# Supplementary material for: CO2-dependent opening of connexin 43 hemichannels
Source: eLife. 2026 Jun 3;14:RP105989. doi: 10.7554/eLife.105989 (PMC13233067; doi:10.7554/eLife.105989)
Supplement: Figure 2—source data 1. [file elife-105989-fig2-data1.xlsx]

## Sheet: 2A Cumulative Probability
20	70	0 Ca			Cum. Prob. 20	Cum. Prob. 70	Cum. Prob. 0 Ca
213.296	599.193	592.585		1	0.00219298	0.00232019	0.00268817
245.983	743.644	631.149		2	0.00438596	0.00464037	0.00537634
298.681	790.799	669.304		3	0.00657895	0.00696056	0.00806452
311.966	797.661	684.338		4	0.00877193	0.00928074	0.0107527
370.801	804.068	758.911		5	0.0109649	0.0116009	0.0134409
404.658	828.238	778.636		6	0.0131579	0.0139211	0.016129
418.521	867.467	784.539		7	0.0153509	0.0162413	0.0188172
424.592	870.095	784.63		8	0.0175439	0.0185615	0.0215054
432.943	881.617	786.501		9	0.0197368	0.0208817	0.0241935
435.356	889.396	803.579		10	0.0219298	0.0232019	0.0268817
436.997	894.218	821.644		11	0.0241228	0.025522	0.0295699
456.869	898.215	826.279		12	0.0263158	0.0278422	0.0322581
473.294	898.273	847.835		13	0.0285088	0.0301624	0.0349462
473.897	899.162	848.777		14	0.0307018	0.0324826	0.0376344
477.727	911.087	879.999		15	0.0328947	0.0348028	0.0403226
489.988	913.595	882.698		16	0.0350877	0.037123	0.0430108
491.346	915.586	893.689		17	0.0372807	0.0394432	0.0456989
505.242	931.681	895.635		18	0.0394737	0.0417633	0.0483871
515.293	966.72	900.163		19	0.0416667	0.0440835	0.0510753
518.057	967.207	904.95		20	0.0438596	0.0464037	0.0537634
521.799	973.32	905.406		21	0.0460526	0.0487239	0.0564516
523.913	978.11	923.439		22	0.0482456	0.0510441	0.0591398
528.155	993.682	925.742		23	0.0504386	0.0533643	0.061828
533.206	999.858	934.253		24	0.0526316	0.0556845	0.0645161
555.256	1007	940.5		25	0.0548246	0.0580046	0.0672043
556.137	1007.85	950.61		26	0.0570175	0.0603248	0.0698925
558.293	1013.21	959.422		27	0.0592105	0.062645	0.0725806
562.431	1024.15	964.446		28	0.0614035	0.0649652	0.0752688
568.499	1032.03	973.711		29	0.0635965	0.0672854	0.077957
572.212	1038.76	983.338		30	0.0657895	0.0696056	0.0806452
572.866	1055.26	1004.28		31	0.0679825	0.0719258	0.0833333
574.377	1078.69	1008.83		32	0.0701754	0.0742459	0.0860215
578.7	1101.83	1010.57		33	0.0723684	0.0765661	0.0887097
581.496	1106.81	1012.75		34	0.0745614	0.0788863	0.0913978
595.84	1111.1	1014.13		35	0.0767544	0.0812065	0.094086
598.901	1111.42	1030.19		36	0.0789474	0.0835267	0.0967742
602.567	1112.37	1045.89		37	0.0811404	0.0858469	0.0994624
609.499	1114.62	1048.26		38	0.0833333	0.0881671	0.102151
611.784	1114.67	1059.26		39	0.0855263	0.0904872	0.104839
613.784	1123.54	1071.37		40	0.0877193	0.0928074	0.107527
615.657	1128.73	1076.03		41	0.0899123	0.0951276	0.110215
618.709	1131.31	1077.19		42	0.0921053	0.0974478	0.112903
620.45	1138.04	1081.69		43	0.0942982	0.099768	0.115591
621.594	1139.4	1088.11		44	0.0964912	0.102088	0.11828
635.288	1139.68	1088.89		45	0.0986842	0.104408	0.120968
636.085	1143.58	1090.21		46	0.100877	0.106729	0.123656
636.229	1164.87	1091.87		47	0.10307	0.109049	0.126344
640.674	1175.61	1092.33		48	0.105263	0.111369	0.129032
643.535	1179.33	1093.29		49	0.107456	0.113689	0.13172
644.796	1181.25	1097.96		50	0.109649	0.116009	0.134409
647.998	1182.58	1102.04		51	0.111842	0.118329	0.137097
653.351	1185.58	1118.91		52	0.114035	0.12065	0.139785
654.641	1196.25	1125.88		53	0.116228	0.12297	0.142473
654.965	1198.84	1132.17		54	0.118421	0.12529	0.145161
655.481	1203.49	1134.25		55	0.120614	0.12761	0.147849
661.135	1205.07	1134.74		56	0.122807	0.12993	0.150538
662.784	1205.43	1141.9		57	0.125	0.132251	0.153226
663.817	1208.99	1145.77		58	0.127193	0.134571	0.155914
664.163	1209.26	1147.73		59	0.129386	0.136891	0.158602
667.227	1210.84	1148.02		60	0.131579	0.139211	0.16129
671.193	1214.55	1148.73		61	0.133772	0.141531	0.163978
673.838	1215.77	1150.69		62	0.135965	0.143852	0.166667
674.655	1219.4	1156.92		63	0.138158	0.146172	0.169355
679.515	1225.98	1158.43		64	0.140351	0.148492	0.172043
680.72	1227.17	1159.47		65	0.142544	0.150812	0.174731
683.129	1232.6	1163.38		66	0.144737	0.153132	0.177419
685.97	1234.7	1168.23		67	0.14693	0.155452	0.180108
686.827	1242.19	1172.12		68	0.149123	0.157773	0.182796
686.926	1249.05	1175.93		69	0.151316	0.160093	0.185484
688.281	1252.24	1183.75		70	0.153509	0.162413	0.188172
690.641	1256.42	1184.76		71	0.155702	0.164733	0.19086
692.37	1256.58	1194.34		72	0.157895	0.167053	0.193548
692.407	1263.79	1200.17		73	0.160088	0.169374	0.196237
692.87	1266.84	1202.43		74	0.162281	0.171694	0.198925
692.989	1270.99	1207.1		75	0.164474	0.174014	0.201613
698.786	1271.21	1237.05		76	0.166667	0.176334	0.204301
700.202	1283.71	1239.81		77	0.16886	0.178654	0.206989
700.729	1299.79	1242.19		78	0.171053	0.180974	0.209677
701.031	1304.91	1242.9		79	0.173246	0.183295	0.212366
701.762	1305.32	1257.57		80	0.175439	0.185615	0.215054
703.928	1313.65	1258.53		81	0.177632	0.187935	0.217742
705.705	1317.65	1260.2		82	0.179825	0.190255	0.22043
707.291	1319.26	1260.4		83	0.182018	0.192575	0.223118
708.936	1327.17	1261.69		84	0.184211	0.194896	0.225806
710.023	1350.46	1264.53		85	0.186404	0.197216	0.228495
710.826	1353.8	1272.04		86	0.188596	0.199536	0.231183
714.927	1354.26	1273.12		87	0.190789	0.201856	0.233871
717.845	1356.08	1278.57		88	0.192982	0.204176	0.236559
718.377	1358.97	1281.85		89	0.195175	0.206497	0.239247
720.59	1368.33	1288.03		90	0.197368	0.208817	0.241935
721.516	1371.52	1294.79		91	0.199561	0.211137	0.244624
724.131	1373.42	1299.08		92	0.201754	0.213457	0.247312
727.592	1384.56	1299.19		93	0.203947	0.215777	0.25
727.853	1384.61	1311.86		94	0.20614	0.218097	0.252688
728.507	1389.01	1313.37		95	0.208333	0.220418	0.255376
728.695	1391.8	1314.92		96	0.210526	0.222738	0.258065
729.448	1394	1316.47		97	0.212719	0.225058	0.260753
729.505	1394.88	1316.96		98	0.214912	0.227378	0.263441
731.865	1395.79	1323.34		99	0.217105	0.229698	0.266129
731.927	1397.2	1326.73		100	0.219298	0.232019	0.268817
733.121	1400.37	1335.59		101	0.221491	0.234339	0.271505
734.542	1420.09	1338.08		102	0.223684	0.236659	0.274194
738.293	1421.26	1338.69		103	0.225877	0.238979	0.276882
739.119	1425.94	1339.19		104	0.22807	0.241299	0.27957
745.26	1432.64	1340.18		105	0.230263	0.243619	0.282258
745.579	1435.37	1342.92		106	0.232456	0.24594	0.284946
747.705	1439.04	1343.49		107	0.234649	0.24826	0.287634
748.184	1450.13	1344.21		108	0.236842	0.25058	0.290323
753.517	1462.37	1359.17		109	0.239035	0.2529	0.293011
755.887	1465.85	1368.81		110	0.241228	0.25522	0.295699
757.876	1468.82	1369.38		111	0.243421	0.257541	0.298387
758.112	1476.96	1371.88		112	0.245614	0.259861	0.301075
761.562	1479.18	1373.66		113	0.247807	0.262181	0.303763
763.635	1481.36	1376.74		114	0.25	0.264501	0.306452
765.618	1483.28	1382.76		115	0.252193	0.266821	0.30914
765.749	1483.45	1382.99		116	0.254386	0.269142	0.311828
769.809	1492.01	1387.14		117	0.256579	0.271462	0.314516
775.567	1496.26	1400.31		118	0.258772	0.273782	0.317204
776.151	1497.36	1400.94		119	0.260965	0.276102	0.319892
777.581	1497.72	1401.37		120	0.263158	0.278422	0.322581
778.444	1502.04	1407.62		121	0.265351	0.280742	0.325269
780.289	1506.42	1411.74		122	0.267544	0.283063	0.327957
780.682	1508.06	1412.97		123	0.269737	0.285383	0.330645
781.027	1512.72	1413.64		124	0.27193	0.287703	0.333333
783.094	1515.03	1417.8		125	0.274123	0.290023	0.336022
783.276	1517	1419.27		126	0.276316	0.292343	0.33871
783.647	1525.25	1421.21		127	0.278509	0.294664	0.341398
786.37	1526.81	1421.94		128	0.280702	0.296984	0.344086
786.748	1530.11	1422.87		129	0.282895	0.299304	0.346774
787.462	1530.29	1425.78		130	0.285088	0.301624	0.349462
788.333	1535.12	1425.93		131	0.287281	0.303944	0.352151
797.399	1538.79	1428.48		132	0.289474	0.306265	0.354839
797.951	1539.14	1437.38		133	0.291667	0.308585	0.357527
801.613	1541.56	1441.12		134	0.29386	0.310905	0.360215
801.709	1547.09	1442.7		135	0.296053	0.313225	0.362903
802.386	1549.52	1443.45		136	0.298246	0.315545	0.365591
804.184	1550.76	1456.98		137	0.300439	0.317865	0.36828
806.334	1552.28	1462.51		138	0.302632	0.320186	0.370968
806.729	1559.75	1463.82		139	0.304825	0.322506	0.373656
807.301	1581	1465.33		140	0.307018	0.324826	0.376344
808.336	1581.18	1471.15		141	0.309211	0.327146	0.379032
808.637	1581.6	1471.35		142	0.311404	0.329466	0.38172
809.579	1583.47	1473.04		143	0.313596	0.331787	0.384409
813.986	1589.61	1473.85		144	0.315789	0.334107	0.387097
814.887	1589.98	1481.98		145	0.317982	0.336427	0.389785
815.205	1590.09	1494.43		146	0.320175	0.338747	0.392473
817.836	1593.06	1500.55		147	0.322368	0.341067	0.395161
821.393	1593.79	1501.73		148	0.324561	0.343387	0.397849
821.615	1597.58	1506.81		149	0.326754	0.345708	0.400538
827.306	1603.83	1508.26		150	0.328947	0.348028	0.403226
829.906	1605.95	1508.81		151	0.33114	0.350348	0.405914
830.173	1607.83	1511.9		152	0.333333	0.352668	0.408602
831.474	1607.97	1513.72		153	0.335526	0.354988	0.41129
837.174	1608.35	1518.08		154	0.337719	0.357309	0.413978
838.327	1615.13	1522.91		155	0.339912	0.359629	0.416667
838.834	1615.59	1524.77		156	0.342105	0.361949	0.419355
840.967	1620.69	1525.77		157	0.344298	0.364269	0.422043
842.864	1626.15	1535.83		158	0.346491	0.366589	0.424731
842.937	1627.44	1538.89		159	0.348684	0.36891	0.427419
844.889	1628.19	1545.63		160	0.350877	0.37123	0.430108
845.191	1629.91	1554.44		161	0.35307	0.37355	0.432796
848.68	1632.14	1558.25		162	0.355263	0.37587	0.435484
848.744	1633.04	1566.03		163	0.357456	0.37819	0.438172
850.893	1635.69	1575.5		164	0.359649	0.38051	0.44086
853.625	1637.27	1581.18		165	0.361842	0.382831	0.443548
856.608	1639.03	1583.26		166	0.364035	0.385151	0.446237
856.655	1646.06	1584.62		167	0.366228	0.387471	0.448925
861.772	1648.52	1584.85		168	0.368421	0.389791	0.451613
862.818	1649.54	1585.46		169	0.370614	0.392111	0.454301
865.704	1651.14	1585.7		170	0.372807	0.394432	0.456989
867.958	1655.85	1587.79		171	0.375	0.396752	0.459677
868.95	1658.45	1588.01		172	0.377193	0.399072	0.462366
869.015	1661.05	1592.62		173	0.379386	0.401392	0.465054
869.935	1661.35	1596.02		174	0.381579	0.403712	0.467742
869.997	1667.72	1604.36		175	0.383772	0.406032	0.47043
879.862	1674.54	1605.59		176	0.385965	0.408353	0.473118
883.407	1675.83	1608.04		177	0.388158	0.410673	0.475806
884.552	1678.09	1615.67		178	0.390351	0.412993	0.478495
885.554	1678.55	1616.23		179	0.392544	0.415313	0.481183
886.33	1681.14	1618.84		180	0.394737	0.417633	0.483871
888.468	1686.65	1629		181	0.39693	0.419954	0.486559
888.897	1687.84	1632.56		182	0.399123	0.422274	0.489247
892.023	1689.13	1633.67		183	0.401316	0.424594	0.491935
892.842	1692.63	1635.89		184	0.403509	0.426914	0.494624
894.405	1693.14	1642.85		185	0.405702	0.429234	0.497312
894.833	1693.85	1649.01		186	0.407895	0.431555	0.5
895.69	1695.08	1649.48		187	0.410088	0.433875	0.502688
898.144	1699.92	1653.81		188	0.412281	0.436195	0.505376
898.84	1699.95	1655.09		189	0.414474	0.438515	0.508065
901.6	1702	1655.34		190	0.416667	0.440835	0.510753
902.612	1702.77	1656.97		191	0.41886	0.443155	0.513441
906.064	1704.76	1659.96		192	0.421053	0.445476	0.516129
907.287	1706.23	1662.46		193	0.423246	0.447796	0.518817
910.106	1708.87	1664.43		194	0.425439	0.450116	0.521505
915.199	1710.15	1666.38		195	0.427632	0.452436	0.524194
916.269	1712.04	1671.98		196	0.429825	0.454756	0.526882
916.898	1717.85	1677.05		197	0.432018	0.457077	0.52957
916.912	1727.23	1679.67		198	0.434211	0.459397	0.532258
919.877	1727.29	1683.4		199	0.436404	0.461717	0.534946
927.411	1729.66	1687.28		200	0.438596	0.464037	0.537634
930.829	1730.32	1689.87		201	0.440789	0.466357	0.540323
931.216	1736.35	1690.33		202	0.442982	0.468677	0.543011
933.549	1736.8	1694.33		203	0.445175	0.470998	0.545699
935.848	1738.38	1694.86		204	0.447368	0.473318	0.548387
939.012	1741.17	1700.27		205	0.449561	0.475638	0.551075
942.092	1748.16	1701.9		206	0.451754	0.477958	0.553763
942.529	1750.04	1713.77		207	0.453947	0.480278	0.556452
943.777	1751.83	1715.2		208	0.45614	0.482599	0.55914
945.083	1757.16	1720.58		209	0.458333	0.484919	0.561828
945.262	1760.85	1721.57		210	0.460526	0.487239	0.564516
948.592	1761.62	1723.35		211	0.462719	0.489559	0.567204
949.542	1773.66	1729.66		212	0.464912	0.491879	0.569892
952.978	1775.07	1735.85		213	0.467105	0.4942	0.572581
953.825	1775.71	1737.38		214	0.469298	0.49652	0.575269
953.944	1777.27	1747.58		215	0.471491	0.49884	0.577957
954.796	1782.15	1755.12		216	0.473684	0.50116	0.580645
956.244	1783.21	1757.2		217	0.475877	0.50348	0.583333
957.864	1785.51	1762.6		218	0.47807	0.5058	0.586022
959.77	1788.42	1765.5		219	0.480263	0.508121	0.58871
960.368	1790.9	1771.77		220	0.482456	0.510441	0.591398
962.817	1791.21	1779.71		221	0.484649	0.512761	0.594086
963.273	1803.94	1790.41		222	0.486842	0.515081	0.596774
963.481	1806.4	1795.17		223	0.489035	0.517401	0.599462
969.907	1812.23	1795.6		224	0.491228	0.519722	0.602151
971.018	1812.58	1798.55		225	0.493421	0.522042	0.604839
973.33	1816.51	1801.85		226	0.495614	0.524362	0.607527
987.712	1818.58	1804.23		227	0.497807	0.526682	0.610215
992.352	1819.49	1815.77		228	0.5	0.529002	0.612903
992.432	1822.8	1818.68		229	0.502193	0.531323	0.615591
993.038	1824.38	1823.49		230	0.504386	0.533643	0.61828
994.014	1827.03	1830.47		231	0.506579	0.535963	0.620968
996.985	1834.52	1841.21		232	0.508772	0.538283	0.623656
997.816	1837.88	1843.18		233	0.510965	0.540603	0.626344
998.056	1847.34	1845.86		234	0.513158	0.542923	0.629032
999.376	1848.26	1849.32		235	0.515351	0.545244	0.63172
1001.93	1852.38	1852.81		236	0.517544	0.547564	0.634409
1003.58	1852.59	1854.81		237	0.519737	0.549884	0.637097
1005.14	1855.01	1855.66		238	0.52193	0.552204	0.639785
1007.18	1862.87	1858.93		239	0.524123	0.554524	0.642473
1007.52	1868.9	1862.05		240	0.526316	0.556845	0.645161
1008.04	1869.05	1872.79		241	0.528509	0.559165	0.647849
1008.71	1869.65	1872.82		242	0.530702	0.561485	0.650538
1008.72	1869.82	1874.7		243	0.532895	0.563805	0.653226
1010.3	1870.68	1877.24		244	0.535088	0.566125	0.655914
1010.77	1872.99	1877.88		245	0.537281	0.568445	0.658602
1016.56	1874.14	1880.65		246	0.539474	0.570766	0.66129
1017.01	1874.79	1902.72		247	0.541667	0.573086	0.663978
1019.24	1878.94	1904.27		248	0.54386	0.575406	0.666667
1019.95	1880.12	1904.85		249	0.546053	0.577726	0.669355
1020.25	1891.63	1904.93		250	0.548246	0.580046	0.672043
1021.73	1891.8	1917.86		251	0.550439	0.582367	0.674731
1022.36	1892.03	1918.34		252	0.552632	0.584687	0.677419
1022.52	1899.48	1924.84		253	0.554825	0.587007	0.680108
1022.63	1900.66	1925.73		254	0.557018	0.589327	0.682796
1025.49	1901.22	1932.69		255	0.559211	0.591647	0.685484
1025.8	1907.83	1950.54		256	0.561404	0.593968	0.688172
1027.56	1913	1952.83		257	0.563596	0.596288	0.69086
1028.02	1919.07	1953.7		258	0.565789	0.598608	0.693548
1030.53	1919.56	1957.68		259	0.567982	0.600928	0.696237
1032	1922.84	1965		260	0.570175	0.603248	0.698925
1032.69	1923.43	1969.5		261	0.572368	0.605568	0.701613
1035.65	1924.08	1975.71		262	0.574561	0.607889	0.704301
1037.64	1925.52	1987.41		263	0.576754	0.610209	0.706989
1038.07	1927.74	1989.8		264	0.578947	0.612529	0.709677
1039.61	1931.37	2000.45		265	0.58114	0.614849	0.712366
1041.13	1938.57	2004.39		266	0.583333	0.617169	0.715054
1042.96	1942.24	2007.83		267	0.585526	0.61949	0.717742
1043.29	1946.63	2013.57		268	0.587719	0.62181	0.72043
1044.94	1949.76	2014.18		269	0.589912	0.62413	0.723118
1052.22	1956.06	2018.49		270	0.592105	0.62645	0.725806
1052.99	1958.03	2023.26		271	0.594298	0.62877	0.728495
1060.49	1958.55	2025.82		272	0.596491	0.63109	0.731183
1063.39	1961.38	2026.84		273	0.598684	0.633411	0.733871
1066.5	1964.32	2028.31		274	0.600877	0.635731	0.736559
1068.02	1967.86	2029.4		275	0.60307	0.638051	0.739247
1071.25	1977.05	2039.16		276	0.605263	0.640371	0.741935
1071.44	1979.55	2060.36		277	0.607456	0.642691	0.744624
1073.33	1986.44	2065.18		278	0.609649	0.645012	0.747312
1080.02	1991.12	2067.92		279	0.611842	0.647332	0.75
1080.79	1994.42	2069.7		280	0.614035	0.649652	0.752688
1081.63	2004.97	2075.02		281	0.616228	0.651972	0.755376
1084.1	2005.95	2087.11		282	0.618421	0.654292	0.758065
1084.33	2007.84	2098.72		283	0.620614	0.656613	0.760753
1085.11	2012.27	2113.15		284	0.622807	0.658933	0.763441
1088.98	2026.67	2117.61		285	0.625	0.661253	0.766129
1089.1	2034.56	2118.85		286	0.627193	0.663573	0.768817
1091.51	2049.14	2123.01		287	0.629386	0.665893	0.771505
1095.02	2049.75	2123.03		288	0.631579	0.668213	0.774194
1096.27	2061.66	2125.72		289	0.633772	0.670534	0.776882
1102.2	2064.6	2127.92		290	0.635965	0.672854	0.77957
1104.7	2066.79	2129.36		291	0.638158	0.675174	0.782258
1109.01	2072.21	2132.98		292	0.640351	0.677494	0.784946
1109.42	2076.87	2138.5		293	0.642544	0.679814	0.787634
1112.88	2085.86	2142.48		294	0.644737	0.682135	0.790323
1114.68	2087.01	2143.48		295	0.64693	0.684455	0.793011
1114.88	2092.61	2148.44		296	0.649123	0.686775	0.795699
1114.89	2095.91	2155.01		297	0.651316	0.689095	0.798387
1115.25	2106.67	2180.77		298	0.653509	0.691415	0.801075
1119.44	2110.57	2207.79		299	0.655702	0.693735	0.803763
1120.36	2114.92	2222.64		300	0.657895	0.696056	0.806452
1123.35	2127.29	2223.55		301	0.660088	0.698376	0.80914
1123.94	2128.83	2224.52		302	0.662281	0.700696	0.811828
1125.81	2136.28	2228.13		303	0.664474	0.703016	0.814516
1129.52	2144.75	2238.4		304	0.666667	0.705336	0.817204
1129.58	2146.61	2244.99		305	0.66886	0.707657	0.819892
1134.09	2147.34	2271.23		306	0.671053	0.709977	0.822581
1134.98	2148.68	2289.12		307	0.673246	0.712297	0.825269
1136.59	2150.96	2293.2		308	0.675439	0.714617	0.827957
1136.88	2154.49	2300.13		309	0.677632	0.716937	0.830645
1142.9	2156.79	2310.15		310	0.679825	0.719258	0.833333
1145.78	2159.28	2337.94		311	0.682018	0.721578	0.836022
1146.76	2169.51	2340.51		312	0.684211	0.723898	0.83871
1148.45	2172.97	2362.84		313	0.686404	0.726218	0.841398
1149.55	2183.02	2363.41		314	0.688596	0.728538	0.844086
1152.08	2188.49	2365.25		315	0.690789	0.730858	0.846774
1158.9	2212.55	2391.26		316	0.692982	0.733179	0.849462
1161.66	2214.69	2392.24		317	0.695175	0.735499	0.852151
1165.16	2220.32	2399.17		318	0.697368	0.737819	0.854839
1166.02	2222.17	2399.6		319	0.699561	0.740139	0.857527
1166.44	2243.2	2414.7		320	0.701754	0.742459	0.860215
1167.92	2249.75	2416.01		321	0.703947	0.74478	0.862903
1170.08	2257.92	2437.27		322	0.70614	0.7471	0.865591
1170.33	2267.38	2478.02		323	0.708333	0.74942	0.86828
1174.91	2275.49	2490.45		324	0.710526	0.75174	0.870968
1175.52	2295.93	2509.71		325	0.712719	0.75406	0.873656
1176.5	2297.41	2512.25		326	0.714912	0.756381	0.876344
1177.34	2300.82	2524.92		327	0.717105	0.758701	0.879032
1181.4	2304.39	2571.8		328	0.719298	0.761021	0.88172
1183.06	2308.09	2574.64		329	0.721491	0.763341	0.884409
1196.73	2324.97	2622.06		330	0.723684	0.765661	0.887097
1198.5	2337.55	2657.2		331	0.725877	0.767981	0.889785
1199.74	2340.42	2662.12		332	0.72807	0.770302	0.892473
1210.53	2343.88	2694.92		333	0.730263	0.772622	0.895161
1216.44	2345.16	2695.82		334	0.732456	0.774942	0.897849
1228.42	2345.58	2707.81		335	0.734649	0.777262	0.900538
1229.33	2345.58	2717.66		336	0.736842	0.779582	0.903226
1229.51	2348.02	2731.98		337	0.739035	0.781903	0.905914
1230.67	2354.84	2838.48		338	0.741228	0.784223	0.908602
1232.67	2371.61	2882.46		339	0.743421	0.786543	0.91129
1243.71	2376.17	2926.95		340	0.745614	0.788863	0.913978
1244.16	2383.21	3014.53		341	0.747807	0.791183	0.916667
1247.15	2400.76	3017.26		342	0.75	0.793503	0.919355
1249.38	2402.13	3019.97		343	0.752193	0.795824	0.922043
1257.19	2402.24	3028.5		344	0.754386	0.798144	0.924731
1260.01	2413.24	3064.85		345	0.756579	0.800464	0.927419
1264.64	2421.7	3066.1		346	0.758772	0.802784	0.930108
1267.3	2434.83	3067.62		347	0.760965	0.805104	0.932796
1269.68	2450.17	3136.82		348	0.763158	0.807425	0.935484
1270.62	2450.85	3196.81		349	0.765351	0.809745	0.938172
1270.7	2451.82	3253.55		350	0.767544	0.812065	0.94086
1275.21	2469.18	3297.05		351	0.769737	0.814385	0.943548
1278.61	2470.41	3300.98		352	0.77193	0.816705	0.946237
1286.49	2470.91	3346.25		353	0.774123	0.819026	0.948925
1291.93	2476.88	3453.36		354	0.776316	0.821346	0.951613
1292.28	2489.66	3456.11		355	0.778509	0.823666	0.954301
1293.63	2489.81	3556.07		356	0.780702	0.825986	0.956989
1299.17	2490.2	3567.21		357	0.782895	0.828306	0.959677
1303.16	2520.17	3580.8		358	0.785088	0.830626	0.962366
1307.23	2525.33	3612.36		359	0.787281	0.832947	0.965054
1313.76	2525.74	3657.4		360	0.789474	0.835267	0.967742
1318.34	2550.83	4076.19		361	0.791667	0.837587	0.97043
1326.14	2560.03	4119.74		362	0.79386	0.839907	0.973118
1326.77	2584.74	4205.61		363	0.796053	0.842227	0.975806
1332.67	2585.65	4288.33		364	0.798246	0.844548	0.978495
1334.53	2621.2	4338.08		365	0.800439	0.846868	0.981183
1337.4	2647.18	4679.92		366	0.802632	0.849188	0.983871
1339.56	2650.28	4699.3		367	0.804825	0.851508	0.986559
1346.39	2654	4746.7		368	0.807018	0.853828	0.989247
1348.67	2658.92	4767.87		369	0.809211	0.856148	0.991935
1353.82	2748.84	4812.22		370	0.811404	0.858469	0.994624
1362.1	2819.61	4919.06		371	0.813596	0.860789	0.997312
1371.97	2828.48	5085.52		372	0.815789	0.863109	1
1377.53	2832.31			373	0.817982	0.865429
1378.18	2845.21			374	0.820175	0.867749
1383.73	2854.78			375	0.822368	0.87007
1383.74	2875.5			376	0.824561	0.87239
1383.86	2898.9			377	0.826754	0.87471
1387.94	2904.97			378	0.828947	0.87703
1394.57	2913.24			379	0.83114	0.87935
1394.98	2918.89			380	0.833333	0.881671
1396.71	2919.21			381	0.835526	0.883991
1407.84	2919.89			382	0.837719	0.886311
1407.93	2959.1			383	0.839912	0.888631
1408.53	2967.25			384	0.842105	0.890951
1411.87	2996.03			385	0.844298	0.893271
1412.19	3011.18			386	0.846491	0.895592
1415.11	3046.76			387	0.848684	0.897912
1415.73	3052.7			388	0.850877	0.900232
1418.34	3063.27			389	0.85307	0.902552
1420.17	3069.59			390	0.855263	0.904872
1420.18	3069.59			391	0.857456	0.907193
1424.59	3078.71			392	0.859649	0.909513
1424.9	3101.88			393	0.861842	0.911833
1430.28	3149.39			394	0.864035	0.914153
1436.11	3172.61			395	0.866228	0.916473
1446.58	3204.69			396	0.868421	0.918794
1449.67	3212.99			397	0.870614	0.921114
1452.9	3224.79			398	0.872807	0.923434
1457.75	3240.93			399	0.875	0.925754
1469.02	3335.93			400	0.877193	0.928074
1474.39	3405.09			401	0.879386	0.930394
1502.13	3424.2			402	0.881579	0.932715
1504.11	3515.36			403	0.883772	0.935035
1507.43	3547.11			404	0.885965	0.937355
1507.59	3548.64			405	0.888158	0.939675
1519.65	3651.52			406	0.890351	0.941995
1532.98	3688.58			407	0.892544	0.944316
1533.12	3701.72			408	0.894737	0.946636
1538.65	3753.6			409	0.89693	0.948956
1538.76	3822.55			410	0.899123	0.951276
1542.66	3839.25			411	0.901316	0.953596
1543.01	3883.91			412	0.903509	0.955916
1559.74	3923.5			413	0.905702	0.958237
1577.71	3958.81			414	0.907895	0.960557
1578.28	3963.57			415	0.910088	0.962877
1594.79	4083.84			416	0.912281	0.965197
1594.96	4122.21			417	0.914474	0.967517
1597.68	4126.24			418	0.916667	0.969838
1625.54	4176.03			419	0.91886	0.972158
1633.57	4181.02			420	0.921053	0.974478
1643.63	4201.07			421	0.923246	0.976798
1684.63	4215.45			422	0.925439	0.979118
1687.55	4402.34			423	0.927632	0.981439
1698.18	4434.72			424	0.929825	0.983759
1710.21	4491.02			425	0.932018	0.986079
1712.99	4558.52			426	0.934211	0.988399
1725.68	4564.97			427	0.936404	0.990719
1730.44	4958.79			428	0.938596	0.993039
1752.64	5051.74			429	0.940789	0.99536
1762.47	5100.67			430	0.942982	0.99768
1767.94	5371.46			431	0.945175	1
1786.76				432	0.947368
1788.14				433	0.949561
1833.1				434	0.951754
1835.54				435	0.953947
1840.29				436	0.95614
1877.83				437	0.958333
1903.03				438	0.960526
1923.28				439	0.962719
1931.74				440	0.964912
1945.78				441	0.967105
2001.67				442	0.969298
2006.83				443	0.971491
2071.49				444	0.973684
2087.61				445	0.975877
2093.59				446	0.97807
2268.72				447	0.980263
2280.36				448	0.982456
2300.16				449	0.984649
2323.78				450	0.986842
2436.17				451	0.989035
2497				452	0.991228
2533.2				453	0.993421
2598.6				454	0.995614
2891.81				455	0.997807
2966.03				456	1

## Sheet: 2A Box Plot
20	70
13.9457	16.8114
9.10632	20.6679
10.4329	18.7414
7.75859	18.6905
9.33211	12.6684

## Sheet: 2B
	Conducatance change (nS)				For graph (changes relative to 20 mmHg)
	35 to 20	35 to 55	35 to 70
	-0.7	1.3	2.2		PCO2	Median	LQ	UQ
	-1.1	1.9	2.1		20	0	0	0
	-0.5		1.3		35	0.8	0.625	1.175
	-1.2	2	2.4		55	3.05	2.65	4.425
	0.1	2.5	1.6		70	3.3	2.925	3.5
	-0.8	6.4	12.4
	-0.6		2.6
	-1.3	3.7	2.7
	-0.8	1.7	3
	-2.1	3.6	2.7
Median	-0.8	2.25	2.5
LQ	-1.175	1.85	2.125
UQ	-0.625	3.625	2.7

## Sheet: 2B Untransfected
	Conducatance change (nS)				For graph (changes relative to 20 mmHg)
	35 to 20	35 to 55	35 to 70
		0.2	1		PCO2	Median	LQ	UQ
	-0.11	0.1	-0.3		20	0	0	0
		-0.2	-0.2		35	0.1	-0.2	0.2
	-0.2	-0.6	1.6		55	0.25	-0.1	0.575
		-0.6			70	1.1	0.1	1.8
		0	-0.2
		-0.2	0.2
	0.2	1.7	5.4
	-0.1	1.2	1.9
	-0.3	1.6	1
	0.25	0.5	0
	0.4	0.2	1.7
	-0.8	0.4	1.4
	-0.1	-0.3	2.6
Median	-0.1	0.15	1
LQ	-0.2	-0.2	0
UQ	0.2	0.475	1.7

## Sheet: 2C Box Plot
35	55	70
1.29014	2.70215	2.69479
1.1818	2.80081	2.81113
0.21869	2.89729	2.13425
0.310092	2.94118	2.08319
0.27423	2.78412	2.02743
-0.169246	2.76937	0.684574
-0.13149	2.56837	0.526665
0.122537	2.10392	3.47702
-0.0094503	1.01938	2.8737
0.00564132	1.46084	3.90765
-0.0014069	1.84466	3.54078
0.0152824	1.41804	3.97847
-0.0374409	2.8981	1.74284
-0.0632179	2.85738	1.89307
1.01729	2.81354	1.05063
1.01262	2.99296	1.17392
-0.0430163	2.45633	1.65908
-0.0201877	2.00814	1.62995
0.609829	2.23315	1.67677
0.798414	2.15855	1.65516
2.84749	2.50342	3.48122
1.66743	2.3759	1.42646

## Sheet: 2D
35	55	70
-0.00609935	-0.121526	0.0374058
-0.00538433	-0.211898	0.00986523
-0.0159928	0.0212287	0.0103594
-0.0270765	0.00830317	0.0173916
-0.0126467	0.161654	-0.163106
-0.00720075	0.0800918	-0.137463
-0.00751644	0.0857769	-0.171283
-0.000260627	0.0409885	-0.220256
-0.00135618	0.18677	-0.153572
-0.000879286	0.143973	0.0908578
-0.00186556	-0.365255	0.0736402
-0.0200831	-0.104016	0.0578631
-0.0374016	-0.0766121	0.059499
-0.0156231	-0.0899399	0.0399228

## Sheet: Figure Supplement 1
55 mmHg	50 mM KCl
2.79619	2.88229
2.7345	3.05146
2.57364	2.90126
3.02694	3.00337
2.92005	2.83249
2.69216	2.95299
2.84139	2.91471
2.68918	2.93964
2.85241	3.02225
3.8022	3.44229
3.78586	3.33174
3.61839	3.28004
3.56292	3.2021
3.80507	3.39355
3.8447	3.56034
3.60914	3.17529
3.62104	3.16875
3.75498	3.22356
2.465	2.21651
2.30656	1.92977
2.45947	2.25439
2.07256	1.89009
2.36306	2.10875
2.20156	2.12787
2.17371	2.23828
2.54449	2.54939
2.26777	2.37189
3.79332	3.50376
3.58879	3.269
3.39402	3.45147
3.67971	3.23849
3.49897	3.22244
2.7631	3.34491
4.76929	3.70507
4.54795	3.42315
4.73162	3.79957
4.70968	4.00039
4.09589	3.43562
4.38584	3.52761
4.52501	3.96541
4.16128	3.6502

## Sheet: Figure Supplement 2
55 mmHg	70 mmHg
-0.0265398	-0.130059
-0.0545957	-0.155479
-0.0243196	-0.126084
-0.02007	-0.162193
-0.0235003	-0.126138
-0.0110957
-0.0041261	-0.117194
-0.033698	-0.098032
-0.0628412	-0.227081
-0.0422008	-0.100103
-0.064854	-0.08141
-0.009098	-0.109002
-0.0145921	-0.15461
-0.0158154	-0.132004
-0.0145193	-0.0849354
-0.012911	-0.108179
-0.045523	-0.09959
-0.0274986	-0.123432
-0.02404	-0.210557
-0.0221428	-0.166758
-0.0450477	-0.0989693
-0.0349348	-0.142388
-0.0223231	-0.195778
-0.0210047	-0.177138
-0.0238361	-0.168374
-0.0109891	-0.0483919
-0.0333707	-0.155699
-0.0169003	-0.10301
-0.0238908	-0.1
-0.0673413	-0.199842

## Sheet: Figure Supplement 3
20 mmHg	55 mmHg	70 mmHg
13	13	14
12	15	15
29	14	18
13	12	12
17	14	13
13		13
