# Supplementary material for: CO2-dependent opening of connexin 43 hemichannels
Source: eLife. 2026 Jun 3;14:RP105989. doi: 10.7554/eLife.105989 (PMC13233067; doi:10.7554/eLife.105989)
Supplement: Figure 3—source data 1. [file elife-105989-fig3-data1.xlsx]

## Sheet: Fig 3A
K105Q
20	70	0 Ca			Cum. Prob. 20	Cum. Prob. 70	Cum. Prob. 0 Ca
361.723	503.72	675.415		1	0.00178571	0.00159236	0.00179211
379.544	516.223	809.374		2	0.00357143	0.00318471	0.00358423
391.005	522.542	819.975		3	0.00535714	0.00477707	0.00537634
397.138	545.021	823.415		4	0.00714286	0.00636943	0.00716846
405.797	570.136	841.047		5	0.00892857	0.00796178	0.00896057
405.822	573.129	866.276		6	0.0107143	0.00955414	0.0107527
411.706	585.782	895.041		7	0.0125	0.0111465	0.0125448
419.335	588.684	900.899		8	0.0142857	0.0127389	0.0143369
419.94	605.452	924.448		9	0.0160714	0.0143312	0.016129
429.276	639.167	924.989		10	0.0178571	0.0159236	0.0179211
433.91	647.55	938.371		11	0.0196429	0.0175159	0.0197133
434.367	653.163	938.485		12	0.0214286	0.0191083	0.0215054
440.026	666.596	946.609		13	0.0232143	0.0207006	0.0232975
460.152	682.783	948.889		14	0.025	0.022293	0.0250896
463.591	697.97	950.407		15	0.0267857	0.0238854	0.0268817
468.01	708.598	965.636		16	0.0285714	0.0254777	0.0286738
469.351	709.14	978.646		17	0.0303571	0.0270701	0.0304659
473.143	725.435	985.711		18	0.0321429	0.0286624	0.0322581
476.173	743.248	992.821		19	0.0339286	0.0302548	0.0340502
481.465	746.455	993.611		20	0.0357143	0.0318471	0.0358423
483.176	752.318	1002.25		21	0.0375	0.0334395	0.0376344
485.204	752.825	1002.38		22	0.0392857	0.0350318	0.0394265
485.35	754.56	1004.97		23	0.0410714	0.0366242	0.0412186
488.127	765.072	1007.7		24	0.0428571	0.0382166	0.0430108
499.942	777.123	1014.52		25	0.0446429	0.0398089	0.0448029
503.941	790.611	1018.31		26	0.0464286	0.0414013	0.046595
511.337	791.402	1024.23		27	0.0482143	0.0429936	0.0483871
512.228	799.639	1028.37		28	0.05	0.044586	0.0501792
512.589	800.421	1032.75		29	0.0517857	0.0461783	0.0519713
521.858	803.638	1034.06		30	0.0535714	0.0477707	0.0537634
531.343	817.439	1040.15		31	0.0553571	0.0493631	0.0555556
531.594	821.299	1045.12		32	0.0571429	0.0509554	0.0573477
532.581	836.058	1049.03		33	0.0589286	0.0525478	0.0591398
539.116	838.591	1049.09		34	0.0607143	0.0541401	0.0609319
539.968	839.217	1051.44		35	0.0625	0.0557325	0.062724
547.629	843.466	1052.23		36	0.0642857	0.0573248	0.0645161
551.374	844.377	1058.87		37	0.0660714	0.0589172	0.0663082
556.404	847.574	1060.75		38	0.0678571	0.0605096	0.0681004
561.398	847.597	1065.02		39	0.0696429	0.0621019	0.0698925
570.684	848.41	1067.24		40	0.0714286	0.0636943	0.0716846
571.584	848.666	1070.34		41	0.0732143	0.0652866	0.0734767
571.936	857.706	1070.93		42	0.075	0.066879	0.0752688
572.733	863.986	1071.39		43	0.0767857	0.0684713	0.0770609
575.109	866.552	1081.96		44	0.0785714	0.0700637	0.078853
575.431	867.545	1083.33		45	0.0803571	0.0716561	0.0806452
578.211	870.7	1083.67		46	0.0821429	0.0732484	0.0824373
580.398	874.056	1089.1		47	0.0839286	0.0748408	0.0842294
584.775	876.278	1090.06		48	0.0857143	0.0764331	0.0860215
585.867	878.237	1092.04		49	0.0875	0.0780255	0.0878136
586.377	879.439	1093.06		50	0.0892857	0.0796178	0.0896057
586.873	883.285	1102.98		51	0.0910714	0.0812102	0.0913978
587.422	884.203	1108.13		52	0.0928571	0.0828025	0.09319
591.55	886.067	1108.73		53	0.0946429	0.0843949	0.0949821
592.566	894.049	1111.5		54	0.0964286	0.0859873	0.0967742
593.572	895.437	1116.04		55	0.0982143	0.0875796	0.0985663
597.155	900.489	1118.6		56	0.1	0.089172	0.100358
598.712	901.518	1122.77		57	0.101786	0.0907643	0.102151
599.951	901.796	1123.82		58	0.103571	0.0923567	0.103943
600.339	902.001	1125.63		59	0.105357	0.093949	0.105735
601.552	903.541	1126.63		60	0.107143	0.0955414	0.107527
603.872	906.537	1127.08		61	0.108929	0.0971338	0.109319
606.353	913.08	1127.09		62	0.110714	0.0987261	0.111111
606.365	916.444	1128.93		63	0.1125	0.100318	0.112903
607.677	919.738	1132.07		64	0.114286	0.101911	0.114695
609.389	924.514	1135.43		65	0.116071	0.103503	0.116487
610.656	925.96	1137.43		66	0.117857	0.105096	0.11828
611.409	927.986	1140.02		67	0.119643	0.106688	0.120072
611.917	929.557	1145.31		68	0.121429	0.10828	0.121864
612.99	933.309	1147.69		69	0.123214	0.109873	0.123656
613.659	933.573	1149.78		70	0.125	0.111465	0.125448
618.838	935.447	1150.01		71	0.126786	0.113057	0.12724
623.985	936.581	1154.07		72	0.128571	0.11465	0.129032
627.343	937.095	1155.94		73	0.130357	0.116242	0.130824
633.571	941.693	1162.49		74	0.132143	0.117834	0.132616
634.536	943.816	1162.97		75	0.133929	0.119427	0.134409
636.964	944.857	1163.36		76	0.135714	0.121019	0.136201
638.367	949.533	1164.82		77	0.1375	0.122611	0.137993
640.477	949.991	1166.09		78	0.139286	0.124204	0.139785
644.613	955.81	1172.01		79	0.141071	0.125796	0.141577
647.13	961.967	1177.45		80	0.142857	0.127389	0.143369
648.43	966.456	1178.87		81	0.144643	0.128981	0.145161
651.804	969.196	1183.27		82	0.146429	0.130573	0.146953
652.366	970.305	1187.41		83	0.148214	0.132166	0.148746
652.477	979.519	1190.53		84	0.15	0.133758	0.150538
663.592	983.022	1190.71		85	0.151786	0.13535	0.15233
667.461	985.06	1191.46		86	0.153571	0.136943	0.154122
667.895	987.046	1192.37		87	0.155357	0.138535	0.155914
668.592	994.208	1193.09		88	0.157143	0.140127	0.157706
669.839	995.945	1193.78		89	0.158929	0.14172	0.159498
674.486	1000.94	1194.06		90	0.160714	0.143312	0.16129
676.398	1002.01	1194.15		91	0.1625	0.144904	0.163082
680.672	1002.27	1195.27		92	0.164286	0.146497	0.164875
682.807	1003.24	1204.48		93	0.166071	0.148089	0.166667
683.288	1004.57	1205.9		94	0.167857	0.149682	0.168459
685.396	1008.46	1206.08		95	0.169643	0.151274	0.170251
688.43	1012.42	1207.36		96	0.171429	0.152866	0.172043
689.921	1017.29	1209.18		97	0.173214	0.154459	0.173835
692.733	1018.55	1210.9		98	0.175	0.156051	0.175627
693.062	1021.17	1214.13		99	0.176786	0.157643	0.177419
693.812	1029.81	1218.03		100	0.178571	0.159236	0.179211
693.947	1030.1	1225.85		101	0.180357	0.160828	0.181004
694.754	1034.83	1228.72		102	0.182143	0.16242	0.182796
695.165	1038.09	1230.5		103	0.183929	0.164013	0.184588
695.82	1041.08	1234.26		104	0.185714	0.165605	0.18638
697.514	1044.2	1236.55		105	0.1875	0.167197	0.188172
699.542	1045.52	1236.73		106	0.189286	0.16879	0.189964
699.607	1046.35	1238.56		107	0.191071	0.170382	0.191756
700.64	1050.03	1239.1		108	0.192857	0.171975	0.193548
700.853	1050.19	1240.82		109	0.194643	0.173567	0.195341
700.866	1050.38	1241.16		110	0.196429	0.175159	0.197133
702.146	1053.75	1242.79		111	0.198214	0.176752	0.198925
702.835	1053.97	1247.22		112	0.2	0.178344	0.200717
703.011	1058.11	1247.29		113	0.201786	0.179936	0.202509
704.909	1058.61	1247.84		114	0.203571	0.181529	0.204301
709.224	1058.83	1248.85		115	0.205357	0.183121	0.206093
715.509	1059.47	1249.05		116	0.207143	0.184713	0.207885
718.17	1061.01	1249.21		117	0.208929	0.186306	0.209677
720.242	1062.25	1254.51		118	0.210714	0.187898	0.21147
722.205	1063.62	1254.84		119	0.2125	0.18949	0.213262
722.762	1065.26	1259.76		120	0.214286	0.191083	0.215054
728.625	1065.71	1261.75		121	0.216071	0.192675	0.216846
730.779	1068.05	1262.5		122	0.217857	0.194268	0.218638
730.79	1069.57	1272.63		123	0.219643	0.19586	0.22043
730.848	1070.1	1274.4		124	0.221429	0.197452	0.222222
731.178	1074.31	1275.2		125	0.223214	0.199045	0.224014
734.021	1075.29	1283.78		126	0.225	0.200637	0.225806
737.342	1075.41	1286.71		127	0.226786	0.202229	0.227599
737.486	1075.62	1287.89		128	0.228571	0.203822	0.229391
738.706	1077.39	1291.54		129	0.230357	0.205414	0.231183
740.19	1082.38	1294.36		130	0.232143	0.207006	0.232975
744.645	1089.4	1294.62		131	0.233929	0.208599	0.234767
745.761	1094.76	1296.89		132	0.235714	0.210191	0.236559
748.335	1097.04	1297.14		133	0.2375	0.211783	0.238351
748.891	1098.39	1298.64		134	0.239286	0.213376	0.240143
750.925	1100.56	1299.3		135	0.241071	0.214968	0.241935
751.065	1103.83	1299.43		136	0.242857	0.216561	0.243728
751.166	1105.76	1299.45		137	0.244643	0.218153	0.24552
753.845	1108.3	1299.58		138	0.246429	0.219745	0.247312
753.955	1109.51	1299.92		139	0.248214	0.221338	0.249104
754.398	1117.06	1302.68		140	0.25	0.22293	0.250896
761.453	1122.67	1305.89		141	0.251786	0.224522	0.252688
762.962	1124.95	1312.76		142	0.253571	0.226115	0.25448
763.685	1126.85	1312.76		143	0.255357	0.227707	0.256272
764.368	1128.5	1318.45		144	0.257143	0.229299	0.258065
764.475	1129.64	1320.12		145	0.258929	0.230892	0.259857
766.641	1131.75	1322.56		146	0.260714	0.232484	0.261649
767.066	1132.59	1323.98		147	0.2625	0.234076	0.263441
769.313	1134.21	1328.35		148	0.264286	0.235669	0.265233
770.337	1136.45	1333.43		149	0.266071	0.237261	0.267025
770.38	1138.85	1336.88		150	0.267857	0.238854	0.268817
771.811	1143.74	1337.45		151	0.269643	0.240446	0.270609
774.622	1144.55	1338.49		152	0.271429	0.242038	0.272401
775.632	1147.86	1338.56		153	0.273214	0.243631	0.274194
779.414	1150.56	1342.13		154	0.275	0.245223	0.275986
781.74	1153.52	1343.8		155	0.276786	0.246815	0.277778
785.858	1156.43	1344.72		156	0.278571	0.248408	0.27957
787.4	1159.29	1346.72		157	0.280357	0.25	0.281362
789.089	1159.74	1350.41		158	0.282143	0.251592	0.283154
790.352	1160.72	1351.15		159	0.283929	0.253185	0.284946
793.36	1163.6	1354.52		160	0.285714	0.254777	0.286738
801.55	1164.36	1356.68		161	0.2875	0.256369	0.28853
802.898	1164.47	1357.05		162	0.289286	0.257962	0.290323
805.472	1166.58	1362.48		163	0.291071	0.259554	0.292115
807.767	1168.41	1363.3		164	0.292857	0.261146	0.293907
809.141	1169.56	1364.11		165	0.294643	0.262739	0.295699
813.783	1170.58	1364.37		166	0.296429	0.264331	0.297491
814.982	1171.07	1365.09		167	0.298214	0.265924	0.299283
818.52	1171.57	1367.24		168	0.3	0.267516	0.301075
819.352	1172.39	1368.49		169	0.301786	0.269108	0.302867
824.114	1176.94	1370.72		170	0.303571	0.270701	0.304659
826.293	1177.56	1372.34		171	0.305357	0.272293	0.306452
827.462	1180.11	1373.03		172	0.307143	0.273885	0.308244
827.898	1180.94	1374.39		173	0.308929	0.275478	0.310036
830.813	1186.43	1374.5		174	0.310714	0.27707	0.311828
831.812	1190.34	1375.77		175	0.3125	0.278662	0.31362
832.101	1192.62	1375.96		176	0.314286	0.280255	0.315412
834.695	1192.66	1376.64		177	0.316071	0.281847	0.317204
837.227	1193.21	1377.05		178	0.317857	0.283439	0.318996
837.713	1198.93	1377.7		179	0.319643	0.285032	0.320789
840.563	1200.84	1380.51		180	0.321429	0.286624	0.322581
843.722	1201.53	1381.5		181	0.323214	0.288217	0.324373
845.617	1202.72	1382.78		182	0.325	0.289809	0.326165
846.834	1206.7	1383.95		183	0.326786	0.291401	0.327957
850.483	1208.2	1384.5		184	0.328571	0.292994	0.329749
851.255	1209.01	1385.56		185	0.330357	0.294586	0.331541
852.48	1211.31	1386.58		186	0.332143	0.296178	0.333333
852.747	1211.61	1386.58		187	0.333929	0.297771	0.335125
853.089	1215.26	1388.2		188	0.335714	0.299363	0.336918
853.97	1217.15	1388.36		189	0.3375	0.300955	0.33871
854.153	1220.32	1388.46		190	0.339286	0.302548	0.340502
855.512	1220.71	1389.57		191	0.341071	0.30414	0.342294
855.717	1224.58	1391.16		192	0.342857	0.305732	0.344086
857.083	1224.79	1391.19		193	0.344643	0.307325	0.345878
857.174	1226.25	1392.18		194	0.346429	0.308917	0.34767
863.434	1229.58	1393.91		195	0.348214	0.31051	0.349462
865.538	1231.69	1395.63		196	0.35	0.312102	0.351254
865.659	1231.78	1396.32		197	0.351786	0.313694	0.353047
870.902	1232.8	1396.77		198	0.353571	0.315287	0.354839
872.177	1233.03	1397.94		199	0.355357	0.316879	0.356631
873.02	1234.68	1400.06		200	0.357143	0.318471	0.358423
873.837	1239.08	1400.21		201	0.358929	0.320064	0.360215
875.23	1240.92	1402.07		202	0.360714	0.321656	0.362007
877.534	1241.1	1405.13		203	0.3625	0.323248	0.363799
878.524	1242.45	1407.95		204	0.364286	0.324841	0.365591
882.473	1243.43	1411.25		205	0.366071	0.326433	0.367384
882.55	1243.81	1411.72		206	0.367857	0.328025	0.369176
885.003	1245.09	1411.87		207	0.369643	0.329618	0.370968
885.552	1245.09	1412.61		208	0.371429	0.33121	0.37276
887.14	1255.78	1413.6		209	0.373214	0.332803	0.374552
889.438	1256.48	1414.44		210	0.375	0.334395	0.376344
890.126	1258.82	1415.05		211	0.376786	0.335987	0.378136
890.171	1259.47	1416.09		212	0.378571	0.33758	0.379928
893.318	1261.95	1417.87		213	0.380357	0.339172	0.38172
894.083	1263.74	1419.76		214	0.382143	0.340764	0.383513
896.821	1267.36	1426.2		215	0.383929	0.342357	0.385305
901.285	1268.58	1426.91		216	0.385714	0.343949	0.387097
901.379	1269.02	1428.63		217	0.3875	0.345541	0.388889
902.466	1269.38	1429.31		218	0.389286	0.347134	0.390681
903.947	1273.58	1431.18		219	0.391071	0.348726	0.392473
904.083	1274.94	1431.85		220	0.392857	0.350318	0.394265
905.037	1277.29	1435.26		221	0.394643	0.351911	0.396057
905.792	1277.37	1439.5		222	0.396429	0.353503	0.397849
907.885	1278.24	1440.53		223	0.398214	0.355096	0.399642
910.245	1278.52	1442.16		224	0.4	0.356688	0.401434
911.679	1286.65	1446.44		225	0.401786	0.35828	0.403226
912.096	1286.9	1449.79		226	0.403571	0.359873	0.405018
913.195	1287.47	1451.6		227	0.405357	0.361465	0.40681
913.353	1288.36	1451.64		228	0.407143	0.363057	0.408602
916.186	1290.14	1452.33		229	0.408929	0.36465	0.410394
916.346	1293.89	1453.13		230	0.410714	0.366242	0.412186
918.421	1296.35	1456.74		231	0.4125	0.367834	0.413978
919.266	1300.09	1458.31		232	0.414286	0.369427	0.415771
919.327	1300.21	1460.56		233	0.416071	0.371019	0.417563
920.316	1302.12	1461.99		234	0.417857	0.372611	0.419355
922.767	1302.71	1462.78		235	0.419643	0.374204	0.421147
922.807	1312.36	1465.02		236	0.421429	0.375796	0.422939
924.426	1312.88	1465.67		237	0.423214	0.377389	0.424731
924.669	1312.99	1467.05		238	0.425	0.378981	0.426523
925.31	1322.8	1467.08		239	0.426786	0.380573	0.428315
926.527	1323.12	1470.16		240	0.428571	0.382166	0.430108
927.002	1332.22	1473.87		241	0.430357	0.383758	0.4319
928.158	1337.22	1474.25		242	0.432143	0.38535	0.433692
931.154	1337.72	1475.93		243	0.433929	0.386943	0.435484
936.896	1340.81	1478.12		244	0.435714	0.388535	0.437276
937.393	1342.98	1478.36		245	0.4375	0.390127	0.439068
940.854	1343.04	1479.79		246	0.439286	0.39172	0.44086
941.791	1343.14	1482.88		247	0.441071	0.393312	0.442652
945.229	1344.13	1488.72		248	0.442857	0.394904	0.444444
946.067	1344.99	1489.77		249	0.444643	0.396497	0.446237
948.205	1351.21	1490.27		250	0.446429	0.398089	0.448029
952.799	1352.81	1491.64		251	0.448214	0.399682	0.449821
953.187	1353.64	1495.38		252	0.45	0.401274	0.451613
953.543	1354.05	1496		253	0.451786	0.402866	0.453405
954.386	1354.5	1498.04		254	0.453571	0.404459	0.455197
954.423	1355.14	1498.43		255	0.455357	0.406051	0.456989
954.669	1359.96	1502.42		256	0.457143	0.407643	0.458781
954.878	1360.53	1502.84		257	0.458929	0.409236	0.460573
955.4	1361.51	1502.96		258	0.460714	0.410828	0.462366
957.36	1368.11	1507.81		259	0.4625	0.41242	0.464158
958.308	1371.15	1507.97		260	0.464286	0.414013	0.46595
958.498	1374.96	1509.73		261	0.466071	0.415605	0.467742
959.952	1377.02	1510.33		262	0.467857	0.417197	0.469534
960.824	1377.27	1512.42		263	0.469643	0.41879	0.471326
962.192	1378.28	1515.22		264	0.471429	0.420382	0.473118
963.297	1378.43	1516.02		265	0.473214	0.421975	0.47491
964.87	1380.95	1519.01		266	0.475	0.423567	0.476703
965.115	1382.94	1519.2		267	0.476786	0.425159	0.478495
966.54	1385.12	1519.74		268	0.478571	0.426752	0.480287
966.716	1387.53	1522.24		269	0.480357	0.428344	0.482079
966.816	1390.07	1522.3		270	0.482143	0.429936	0.483871
967.852	1392.77	1524.62		271	0.483929	0.431529	0.485663
969.955	1396.96	1525.83		272	0.485714	0.433121	0.487455
973.027	1397.32	1526.37		273	0.4875	0.434713	0.489247
973.087	1397.61	1528.23		274	0.489286	0.436306	0.491039
973.739	1399.95	1534.96		275	0.491071	0.437898	0.492832
975.999	1400.22	1535.1		276	0.492857	0.43949	0.494624
978.618	1401.67	1536.77		277	0.494643	0.441083	0.496416
982.867	1401.68	1537.68		278	0.496429	0.442675	0.498208
986.063	1401.83	1537.79		279	0.498214	0.444268	0.5
986.078	1403.44	1538.58		280	0.5	0.44586	0.501792
986.199	1406.08	1538.7		281	0.501786	0.447452	0.503584
986.492	1407.92	1539.33		282	0.503571	0.449045	0.505376
986.953	1408.39	1541.18		283	0.505357	0.450637	0.507168
987.572	1409.57	1542.88		284	0.507143	0.452229	0.508961
995.825	1410	1548.02		285	0.508929	0.453822	0.510753
998.651	1411.53	1548.99		286	0.510714	0.455414	0.512545
1000.1	1415.5	1551.32		287	0.5125	0.457006	0.514337
1005	1415.56	1554.79		288	0.514286	0.458599	0.516129
1006.47	1418.41	1558.69		289	0.516071	0.460191	0.517921
1007.34	1419.65	1561.85		290	0.517857	0.461783	0.519713
1010.28	1422.38	1562.99		291	0.519643	0.463376	0.521505
1012.39	1422.9	1563.34		292	0.521429	0.464968	0.523297
1017.15	1424.17	1564.85		293	0.523214	0.466561	0.52509
1018.34	1424.8	1565.03		294	0.525	0.468153	0.526882
1019.89	1428.7	1566.97		295	0.526786	0.469745	0.528674
1020.87	1431.36	1567.28		296	0.528571	0.471338	0.530466
1020.92	1432.19	1567.6		297	0.530357	0.47293	0.532258
1022.99	1433.6	1570.13		298	0.532143	0.474522	0.53405
1023.1	1433.67	1574.48		299	0.533929	0.476115	0.535842
1023.17	1435.3	1574.55		300	0.535714	0.477707	0.537634
1025.98	1437.21	1575.86		301	0.5375	0.479299	0.539427
1026.02	1438.12	1576.27		302	0.539286	0.480892	0.541219
1030.08	1440.11	1576.46		303	0.541071	0.482484	0.543011
1030.63	1441.02	1579.25		304	0.542857	0.484076	0.544803
1030.66	1442.62	1581.85		305	0.544643	0.485669	0.546595
1033.06	1443.04	1582.5		306	0.546429	0.487261	0.548387
1035.11	1446.3	1585.9		307	0.548214	0.488854	0.550179
1037.77	1451.38	1589.43		308	0.55	0.490446	0.551971
1040.78	1451.9	1589.53		309	0.551786	0.492038	0.553763
1041.33	1454.35	1592.22		310	0.553571	0.493631	0.555556
1044.26	1456.01	1595.65		311	0.555357	0.495223	0.557348
1049.4	1457.96	1597.71		312	0.557143	0.496815	0.55914
1051.75	1458.17	1599.07		313	0.558929	0.498408	0.560932
1052.63	1458.2	1599.1		314	0.560714	0.5	0.562724
1053.05	1460.02	1599.35		315	0.5625	0.501592	0.564516
1053.72	1460.62	1604.04		316	0.564286	0.503185	0.566308
1054.35	1466.06	1604.77		317	0.566071	0.504777	0.5681
1054.44	1468.07	1610.15		318	0.567857	0.506369	0.569892
1064.09	1469.32	1611.49		319	0.569643	0.507962	0.571685
1065.93	1472.28	1616.7		320	0.571429	0.509554	0.573477
1066.22	1474.51	1622.63		321	0.573214	0.511146	0.575269
1067.31	1475.05	1623.29		322	0.575	0.512739	0.577061
1069.2	1481	1623.29		323	0.576786	0.514331	0.578853
1069.62	1484.31	1624.43		324	0.578571	0.515924	0.580645
1070.89	1485.79	1624.43		325	0.580357	0.517516	0.582437
1071.6	1487.08	1624.48		326	0.582143	0.519108	0.584229
1072.49	1487.09	1624.78		327	0.583929	0.520701	0.586022
1072.79	1490.15	1629.87		328	0.585714	0.522293	0.587814
1075.79	1496.04	1632.48		329	0.5875	0.523885	0.589606
1075.79	1496.08	1635.39		330	0.589286	0.525478	0.591398
1076.21	1497.96	1635.88		331	0.591071	0.52707	0.59319
1078.79	1498.19	1638.48		332	0.592857	0.528662	0.594982
1079	1498.28	1638.86		333	0.594643	0.530255	0.596774
1079.53	1503.92	1639.03		334	0.596429	0.531847	0.598566
1082.05	1504.54	1641.94		335	0.598214	0.533439	0.600358
1084.69	1506.12	1642.21		336	0.6	0.535032	0.602151
1085.8	1506.29	1643.77		337	0.601786	0.536624	0.603943
1089.14	1508.12	1645.95		338	0.603571	0.538217	0.605735
1089.65	1512.63	1650.33		339	0.605357	0.539809	0.607527
1091.33	1512.88	1650.56		340	0.607143	0.541401	0.609319
1097.71	1515.75	1651.31		341	0.608929	0.542994	0.611111
1098.12	1518.47	1652.55		342	0.610714	0.544586	0.612903
1098.26	1520.56	1654.41		343	0.6125	0.546178	0.614695
1100.91	1521.28	1654.84		344	0.614286	0.547771	0.616487
1101.31	1522.28	1661.33		345	0.616071	0.549363	0.61828
1105.12	1522.42	1664.18		346	0.617857	0.550955	0.620072
1105.36	1522.8	1667.8		347	0.619643	0.552548	0.621864
1105.68	1526.84	1668.54		348	0.621429	0.55414	0.623656
1107.33	1527.33	1668.88		349	0.623214	0.555732	0.625448
1108.44	1529	1679.52		350	0.625	0.557325	0.62724
1118.23	1529.13	1679.72		351	0.626786	0.558917	0.629032
1119.08	1532.43	1680.11		352	0.628571	0.56051	0.630824
1120.47	1533.81	1681.3		353	0.630357	0.562102	0.632616
1120.53	1535.67	1682.83		354	0.632143	0.563694	0.634409
1120.62	1538.87	1683.61		355	0.633929	0.565287	0.636201
1121.69	1541.9	1688.17		356	0.635714	0.566879	0.637993
1124.54	1542.1	1688.81		357	0.6375	0.568471	0.639785
1124.8	1543.1	1691.64		358	0.639286	0.570064	0.641577
1125.2	1546.08	1693.51		359	0.641071	0.571656	0.643369
1127.68	1547.65	1694.45		360	0.642857	0.573248	0.645161
1129.06	1548.27	1696.46		361	0.644643	0.574841	0.646953
1130.61	1553.39	1696.49		362	0.646429	0.576433	0.648746
1131.47	1557.48	1701.4		363	0.648214	0.578025	0.650538
1135.38	1561.22	1701.88		364	0.65	0.579618	0.65233
1137.42	1563.58	1707.57		365	0.651786	0.58121	0.654122
1139.17	1564.11	1716.78		366	0.653571	0.582803	0.655914
1142.63	1565.37	1717.01		367	0.655357	0.584395	0.657706
1143.41	1570.24	1719.48		368	0.657143	0.585987	0.659498
1143.49	1572.18	1719.98		369	0.658929	0.58758	0.66129
1143.95	1573.91	1722.34		370	0.660714	0.589172	0.663082
1145.16	1578.6	1723.35		371	0.6625	0.590764	0.664875
1146.45	1579.49	1724.9		372	0.664286	0.592357	0.666667
1148.03	1579.8	1728.97		373	0.666071	0.593949	0.668459
1152.85	1587.17	1731.15		374	0.667857	0.595541	0.670251
1156.49	1587.42	1734.82		375	0.669643	0.597134	0.672043
1161.11	1588.57	1738.16		376	0.671429	0.598726	0.673835
1161.99	1589.14	1738.47		377	0.673214	0.600318	0.675627
1163.1	1589.42	1741.77		378	0.675	0.601911	0.677419
1164.9	1589.94	1743.02		379	0.676786	0.603503	0.679211
1167.02	1590.44	1743.07		380	0.678571	0.605096	0.681004
1171.11	1590.58	1743.96		381	0.680357	0.606688	0.682796
1172.72	1590.87	1745.9		382	0.682143	0.60828	0.684588
1177.08	1594.05	1747.02		383	0.683929	0.609873	0.68638
1177.51	1595.61	1747.62		384	0.685714	0.611465	0.688172
1188.74	1597.06	1747.85		385	0.6875	0.613057	0.689964
1190.05	1597.33	1751.51		386	0.689286	0.61465	0.691756
1191.51	1597.64	1758.5		387	0.691071	0.616242	0.693548
1192.84	1598.34	1768.28		388	0.692857	0.617834	0.695341
1193.38	1599.35	1775.06		389	0.694643	0.619427	0.697133
1194.35	1605.83	1775.42		390	0.696429	0.621019	0.698925
1195.48	1605.95	1777.45		391	0.698214	0.622611	0.700717
1195.73	1606.23	1778.45		392	0.7	0.624204	0.702509
1200.92	1606.75	1789.1		393	0.701786	0.625796	0.704301
1205.69	1607.86	1794.18		394	0.703571	0.627389	0.706093
1212.09	1609.38	1797.28		395	0.705357	0.628981	0.707885
1213.74	1611.74	1802.31		396	0.707143	0.630573	0.709677
1214.02	1611.75	1802.62		397	0.708929	0.632166	0.71147
1214.58	1611.79	1804.53		398	0.710714	0.633758	0.713262
1216.08	1614.51	1806.14		399	0.7125	0.63535	0.715054
1217.48	1617	1810.14		400	0.714286	0.636943	0.716846
1217.5	1619.56	1810.66		401	0.716071	0.638535	0.718638
1223.67	1620.46	1811.61		402	0.717857	0.640127	0.72043
1228.64	1621.02	1812.13		403	0.719643	0.64172	0.722222
1231.25	1624.19	1821.18		404	0.721429	0.643312	0.724014
1232.64	1625.84	1826.7		405	0.723214	0.644904	0.725806
1234.29	1626.31	1832.21		406	0.725	0.646497	0.727599
1236.06	1627.74	1834.08		407	0.726786	0.648089	0.729391
1236.31	1628.34	1835.62		408	0.728571	0.649682	0.731183
1236.57	1629.16	1837.04		409	0.730357	0.651274	0.732975
1237.44	1631.75	1844.67		410	0.732143	0.652866	0.734767
1239.42	1635.67	1847.67		411	0.733929	0.654459	0.736559
1239.48	1636.44	1849.94		412	0.735714	0.656051	0.738351
1242.61	1636.8	1851.35		413	0.7375	0.657643	0.740143
1245.66	1637.24	1859.05		414	0.739286	0.659236	0.741935
1247.7	1638	1860.52		415	0.741071	0.660828	0.743728
1249.02	1638.09	1863		416	0.742857	0.66242	0.74552
1249.06	1639.6	1872.3		417	0.744643	0.664013	0.747312
1250.09	1640.79	1882.41		418	0.746429	0.665605	0.749104
1250.85	1648	1886.59		419	0.748214	0.667197	0.750896
1253.53	1654.8	1891.66		420	0.75	0.66879	0.752688
1258.46	1666.01	1893.22		421	0.751786	0.670382	0.75448
1258.97	1666.96	1893.9		422	0.753571	0.671975	0.756272
1259.76	1669.41	1895.34		423	0.755357	0.673567	0.758065
1260.94	1670.45	1899.03		424	0.757143	0.675159	0.759857
1260.98	1670.79	1904.21		425	0.758929	0.676752	0.761649
1265.46	1671.56	1909.68		426	0.760714	0.678344	0.763441
1265.7	1671.67	1912.15		427	0.7625	0.679936	0.765233
1268.82	1678.05	1925.19		428	0.764286	0.681529	0.767025
1268.91	1680.21	1927.17		429	0.766071	0.683121	0.768817
1268.93	1682.17	1929.26		430	0.767857	0.684713	0.770609
1270.04	1683.63	1934.2		431	0.769643	0.686306	0.772401
1270.13	1684.65	1935.31		432	0.771429	0.687898	0.774194
1275.77	1688	1935.34		433	0.773214	0.68949	0.775986
1276.16	1688.7	1938.68		434	0.775	0.691083	0.777778
1276.48	1690.4	1941.45		435	0.776786	0.692675	0.77957
1277.73	1694.32	1943.9		436	0.778571	0.694268	0.781362
1280.08	1694.79	1944.37		437	0.780357	0.69586	0.783154
1280.73	1694.99	1948.39		438	0.782143	0.697452	0.784946
1283.64	1695.41	1949.08		439	0.783929	0.699045	0.786738
1285.06	1699.53	1957.13		440	0.785714	0.700637	0.78853
1286.98	1699.89	1963.43		441	0.7875	0.702229	0.790323
1291.15	1703.01	1972.03		442	0.789286	0.703822	0.792115
1291.62	1704.14	1980.99		443	0.791071	0.705414	0.793907
1291.8	1705.7	1981.27		444	0.792857	0.707006	0.795699
1293.46	1706.17	1987.45		445	0.794643	0.708599	0.797491
1302.79	1708.3	1990.68		446	0.796429	0.710191	0.799283
1303.26	1712.12	1990.87		447	0.798214	0.711783	0.801075
1305.99	1714.64	1994.3		448	0.8	0.713376	0.802867
1313.88	1717.1	1995.5		449	0.801786	0.714968	0.804659
1314.89	1718.99	2002.82		450	0.803571	0.716561	0.806452
1318.08	1722.24	2003.36		451	0.805357	0.718153	0.808244
1320.18	1722.45	2006.85		452	0.807143	0.719745	0.810036
1336.09	1724.25	2014.52		453	0.808929	0.721338	0.811828
1337.83	1729.69	2017.11		454	0.810714	0.72293	0.81362
1337.85	1730.61	2024.51		455	0.8125	0.724522	0.815412
1339.7	1749.81	2025.05		456	0.814286	0.726115	0.817204
1342.83	1753.76	2028.84		457	0.816071	0.727707	0.818996
1343.16	1755.76	2039.34		458	0.817857	0.729299	0.820789
1345.12	1758.12	2041.2		459	0.819643	0.730892	0.822581
1348.21	1765.02	2046.42		460	0.821429	0.732484	0.824373
1349.26	1767.76	2070.35		461	0.823214	0.734076	0.826165
1349.76	1769.1	2071.07		462	0.825	0.735669	0.827957
1356	1769.19	2072.31		463	0.826786	0.737261	0.829749
1360.86	1772.22	2081.19		464	0.828571	0.738854	0.831541
1361.44	1780.17	2084.36		465	0.830357	0.740446	0.833333
1361.68	1781.89	2091.96		466	0.832143	0.742038	0.835125
1363.49	1783.2	2092.36		467	0.833929	0.743631	0.836918
1369.35	1784.6	2094.88		468	0.835714	0.745223	0.83871
1371.89	1792.52	2103.2		469	0.8375	0.746815	0.840502
1372.78	1794.81	2120.32		470	0.839286	0.748408	0.842294
1374.65	1796.85	2130.81		471	0.841071	0.75	0.844086
1374.91	1798.22	2133.18		472	0.842857	0.751592	0.845878
1376.02	1806.19	2134.02		473	0.844643	0.753185	0.84767
1376.07	1806.97	2134.96		474	0.846429	0.754777	0.849462
1376.29	1808.21	2142.1		475	0.848214	0.756369	0.851254
1378.02	1808.7	2147.73		476	0.85	0.757962	0.853047
1378.26	1815.06	2151.86		477	0.851786	0.759554	0.854839
1382.11	1821.34	2159.89		478	0.853571	0.761146	0.856631
1388.56	1823.58	2167.8		479	0.855357	0.762739	0.858423
1389.24	1824.81	2172.91		480	0.857143	0.764331	0.860215
1393.06	1827.1	2176.79		481	0.858929	0.765924	0.862007
1395.98	1827.87	2177.32		482	0.860714	0.767516	0.863799
1396.19	1833.56	2185.39		483	0.8625	0.769108	0.865591
1397.46	1833.62	2191.22		484	0.864286	0.770701	0.867384
1397.61	1853.49	2195.94		485	0.866071	0.772293	0.869176
1408.63	1855.51	2197.25		486	0.867857	0.773885	0.870968
1412.87	1859.24	2198.84		487	0.869643	0.775478	0.87276
1417.33	1863.29	2199.06		488	0.871429	0.77707	0.874552
1417.91	1865.43	2203.48		489	0.873214	0.778662	0.876344
1423.05	1869.76	2207.61		490	0.875	0.780255	0.878136
1425.6	1876.36	2215.75		491	0.876786	0.781847	0.879928
1430.01	1881.83	2220.12		492	0.878571	0.783439	0.88172
1434.5	1883.11	2233.16		493	0.880357	0.785032	0.883513
1441.61	1891.52	2237.86		494	0.882143	0.786624	0.885305
1442.94	1894.18	2239.06		495	0.883929	0.788217	0.887097
1451.4	1900.83	2245.1		496	0.885714	0.789809	0.888889
1454.61	1903.14	2247.3		497	0.8875	0.791401	0.890681
1455.26	1905.99	2249.94		498	0.889286	0.792994	0.892473
1463.28	1910.72	2268.11		499	0.891071	0.794586	0.894265
1467.03	1910.89	2271.86		500	0.892857	0.796178	0.896057
1469.66	1915.44	2277.72		501	0.894643	0.797771	0.897849
1475.51	1917.24	2287.9		502	0.896429	0.799363	0.899642
1476.29	1926.82	2295.21		503	0.898214	0.800955	0.901434
1479.32	1933.25	2299.64		504	0.9	0.802548	0.903226
1483.39	1938.73	2313.28		505	0.901786	0.80414	0.905018
1486.81	1940.62	2318.13		506	0.903571	0.805732	0.90681
1491.02	1940.99	2319.05		507	0.905357	0.807325	0.908602
1492.2	1942.29	2331.43		508	0.907143	0.808917	0.910394
1494.34	1945.17	2346.53		509	0.908929	0.81051	0.912186
1505.41	1948.93	2361.76		510	0.910714	0.812102	0.913978
1515.69	1957.11	2366.7		511	0.9125	0.813694	0.915771
1515.76	1963.84	2372.62		512	0.914286	0.815287	0.917563
1517.79	1964.94	2382.16		513	0.916071	0.816879	0.919355
1525.95	1966.81	2394.14		514	0.917857	0.818471	0.921147
1536.88	1968.73	2397.49		515	0.919643	0.820064	0.922939
1537.46	1968.82	2405.44		516	0.921429	0.821656	0.924731
1539.73	1969.8	2406.85		517	0.923214	0.823248	0.926523
1541.69	1971.34	2418.82		518	0.925	0.824841	0.928315
1548.92	1973.06	2422.01		519	0.926786	0.826433	0.930108
1550.03	1974.45	2423.44		520	0.928571	0.828025	0.9319
1554.29	1976.62	2447.28		521	0.930357	0.829618	0.933692
1554.3	1980.52	2452.76		522	0.932143	0.83121	0.935484
1567.1	1985.71	2466.44		523	0.933929	0.832803	0.937276
1568.79	1989.65	2475.16		524	0.935714	0.834395	0.939068
1589.55	1993.06	2498.2		525	0.9375	0.835987	0.94086
1593.49	1995.68	2506.62		526	0.939286	0.83758	0.942652
1596.82	2000.34	2508.34		527	0.941071	0.839172	0.944444
1597.92	2003.58	2518.06		528	0.942857	0.840764	0.946237
1606.77	2008.36	2522.9		529	0.944643	0.842357	0.948029
1610.73	2008.97	2529.52		530	0.946429	0.843949	0.949821
1613.6	2009.1	2533.08		531	0.948214	0.845541	0.951613
1634.97	2021.71	2574.47		532	0.95	0.847134	0.953405
1638.96	2038.89	2589.33		533	0.951786	0.848726	0.955197
1645.8	2041.74	2630.74		534	0.953571	0.850318	0.956989
1646.2	2042.34	2671.33		535	0.955357	0.851911	0.958781
1646.91	2044.21	2683.95		536	0.957143	0.853503	0.960573
1667.43	2048.7	2705.87		537	0.958929	0.855096	0.962366
1673.73	2056.57	2725.86		538	0.960714	0.856688	0.964158
1675.67	2058.92	2768.06		539	0.9625	0.85828	0.96595
1686.74	2060.21	2775.41		540	0.964286	0.859873	0.967742
1687.77	2069.16	2776.58		541	0.966071	0.861465	0.969534
1687.97	2069.76	2794.05		542	0.967857	0.863057	0.971326
1701.1	2071.2	2845.26		543	0.969643	0.86465	0.973118
1703.14	2074.48	2859.34		544	0.971429	0.866242	0.97491
1708.59	2075.36	2932.26		545	0.973214	0.867834	0.976703
1711.07	2079.09	2968.72		546	0.975	0.869427	0.978495
1747.4	2081.32	2971.36		547	0.976786	0.871019	0.980287
1764.87	2085.72	2972.38		548	0.978571	0.872611	0.982079
1778.08	2086.57	3037.29		549	0.980357	0.874204	0.983871
1783.4	2098.51	3090.47		550	0.982143	0.875796	0.985663
1784.26	2100.06	3095.87		551	0.983929	0.877389	0.987455
1839.59	2101.5	3142.4		552	0.985714	0.878981	0.989247
1851.41	2119.86	3293.53		553	0.9875	0.880573	0.991039
1867.98	2121.27	3356.26		554	0.989286	0.882166	0.992832
1891.47	2124.87	3402.75		555	0.991071	0.883758	0.994624
1891.55	2129.15	3484.27		556	0.992857	0.88535	0.996416
1920.86	2129.8	3605.16		557	0.994643	0.886943	0.998208
2117.04	2131.46	3767.03		558	0.996429	0.888535	1
2303.68	2136.13			559	0.998214	0.890127
2345.38	2139.88			560	1	0.89172
	2144.28			561		0.893312
	2144.91			562		0.894904
	2152.09			563		0.896497
	2159.8			564		0.898089
	2168.23			565		0.899682
	2171.06			566		0.901274
	2180.28			567		0.902866
	2185.24			568		0.904459
	2224.48			569		0.906051
	2224.61			570		0.907643
	2234.88			571		0.909236
	2236.94			572		0.910828
	2237.43			573		0.91242
	2255.37			574		0.914013
	2258.94			575		0.915605
	2260.73			576		0.917197
	2265.82			577		0.91879
	2272.1			578		0.920382
	2275.14			579		0.921975
	2285.01			580		0.923567
	2286.45			581		0.925159
	2288.22			582		0.926752
	2302.47			583		0.928344
	2385.95			584		0.929936
	2386.63			585		0.931529
	2394.11			586		0.933121
	2412.41			587		0.934713
	2465.78			588		0.936306
	2473.43			589		0.937898
	2497.64			590		0.93949
	2525.48			591		0.941083
	2538.35			592		0.942675
	2550.42			593		0.944268
	2551.1			594		0.94586
	2580.36			595		0.947452
	2580.89			596		0.949045
	2584.49			597		0.950637
	2597.58			598		0.952229
	2603.02			599		0.953822
	2609.89			600		0.955414
	2666.38			601		0.957006
	2699.95			602		0.958599
	2721.85			603		0.960191
	2730.54			604		0.961783
	2759.18			605		0.963376
	2765.28			606		0.964968
	2796.31			607		0.966561
	2817.15			608		0.968153
	2824.98			609		0.969745
	2849.34			610		0.971338
	2880.9			611		0.97293
	2887.19			612		0.974522
	2901.82			613		0.976115
	2988.19			614		0.977707
	3003.12			615		0.979299
	3042.48			616		0.980892
	3057.65			617		0.982484
	3079.67			618		0.984076
	3086.63			619		0.985669
	3108.7			620		0.987261
	3122.95			621		0.988854
	3165.11			622		0.990446
	3228.75			623		0.992038
	3377.88			624		0.993631
	3700.49			625		0.995223
	4071.5			626		0.996815
	4157.2			627		0.998408
	4280.8			628		1

## Sheet: Fig 3B
K109Q
20	70	0 Ca			Cum. Prob. 20	Cum. Prob. 70	Cum. Prob. 0 Ca
140.703	652.231	642.495		1	0.002331	0.00242718	0.00186567
240.618	669.821	673.678		2	0.004662	0.00485437	0.00373134
248.345	706.026	711.043		3	0.00699301	0.00728155	0.00559701
256.966	720.586	718.815		4	0.00932401	0.00970874	0.00746269
288.948	737.312	725.189		5	0.011655	0.0121359	0.00932836
335.489	745.351	782.157		6	0.013986	0.0145631	0.011194
344.058	763.627	802.142		7	0.016317	0.0169903	0.0130597
360.19	778.794	812.257		8	0.018648	0.0194175	0.0149254
391.225	793.381	847.008		9	0.020979	0.0218447	0.016791
407.12	853.178	877.399		10	0.02331	0.0242718	0.0186567
407.863	872.716	886.491		11	0.025641	0.026699	0.0205224
410	873.984	904.798		12	0.027972	0.0291262	0.0223881
410.731	889.113	928.051		13	0.030303	0.0315534	0.0242537
413.253	891.47	930.043		14	0.032634	0.0339806	0.0261194
420.973	918.861	934.032		15	0.034965	0.0364078	0.0279851
426.641	923.226	944.967		16	0.037296	0.038835	0.0298507
428.771	930.038	951.355		17	0.039627	0.0412621	0.0317164
434.748	962.383	951.404		18	0.041958	0.0436893	0.0335821
443.447	964.126	955.197		19	0.044289	0.0461165	0.0354478
466.612	969.545	960.795		20	0.04662	0.0485437	0.0373134
484.138	989.136	979.368		21	0.048951	0.0509709	0.0391791
486.222	992.661	992.628		22	0.0512821	0.0533981	0.0410448
500.56	1011.7	995.855		23	0.0536131	0.0558252	0.0429104
504.393	1013.26	998.524		24	0.0559441	0.0582524	0.0447761
512.609	1020.19	1006.57		25	0.0582751	0.0606796	0.0466418
515.419	1029.46	1008.28		26	0.0606061	0.0631068	0.0485075
518.234	1029.96	1016.99		27	0.0629371	0.065534	0.0503731
539.805	1030.38	1019.3		28	0.0652681	0.0679612	0.0522388
545.367	1035.51	1027.17		29	0.0675991	0.0703883	0.0541045
545.634	1043.83	1029.61		30	0.0699301	0.0728155	0.0559701
558.444	1044.85	1042.07		31	0.0722611	0.0752427	0.0578358
561.047	1048.67	1055.63		32	0.0745921	0.0776699	0.0597015
564.492	1051.98	1056.21		33	0.0769231	0.0800971	0.0615672
568.287	1062.69	1061.65		34	0.0792541	0.0825243	0.0634328
572.824	1074.23	1067.18		35	0.0815851	0.0849515	0.0652985
573.189	1081.81	1079.15		36	0.0839161	0.0873786	0.0671642
575.31	1088.11	1086.48		37	0.0862471	0.0898058	0.0690299
576.733	1088.93	1087.36		38	0.0885781	0.092233	0.0708955
577.514	1089.89	1088.11		39	0.0909091	0.0946602	0.0727612
592.048	1100.78	1089.22		40	0.0932401	0.0970874	0.0746269
604.478	1104.82	1091.63		41	0.0955711	0.0995146	0.0764925
606.279	1105.13	1096.87		42	0.0979021	0.101942	0.0783582
606.881	1112.76	1106.22		43	0.100233	0.104369	0.0802239
610.443	1120.36	1107.51		44	0.102564	0.106796	0.0820896
611.634	1126.62	1114.94		45	0.104895	0.109223	0.0839552
613.62	1128.32	1116.76		46	0.107226	0.11165	0.0858209
615.642	1130.05	1117.16		47	0.109557	0.114078	0.0876866
618.962	1135.39	1117.64		48	0.111888	0.116505	0.0895522
621.336	1141.14	1129.79		49	0.114219	0.118932	0.0914179
625.554	1142.77	1131.38		50	0.11655	0.121359	0.0932836
625.651	1147.35	1132.52		51	0.118881	0.123786	0.0951493
632.844	1153.14	1135.36		52	0.121212	0.126214	0.0970149
639.082	1178.87	1148.69		53	0.123543	0.128641	0.0988806
641.986	1179.79	1149.37		54	0.125874	0.131068	0.100746
642.688	1181.88	1154.19		55	0.128205	0.133495	0.102612
648.312	1188.26	1157.87		56	0.130536	0.135922	0.104478
649.748	1192.65	1171.45		57	0.132867	0.13835	0.106343
657.389	1192.75	1176.04		58	0.135198	0.140777	0.108209
660.796	1193.13	1180.57		59	0.137529	0.143204	0.110075
665.675	1196.16	1181.57		60	0.13986	0.145631	0.11194
668.977	1201.44	1184.2		61	0.142191	0.148058	0.113806
674.888	1203.98	1190.62		62	0.144522	0.150485	0.115672
677.051	1209.67	1190.93		63	0.146853	0.152913	0.117537
677.445	1209.85	1192.16		64	0.149184	0.15534	0.119403
679.544	1215.59	1193.04		65	0.151515	0.157767	0.121269
687.335	1217.56	1193.89		66	0.153846	0.160194	0.123134
687.492	1219.77	1195.04		67	0.156177	0.162621	0.125
692.607	1226.23	1197.12		68	0.158508	0.165049	0.126866
694.236	1227.73	1198.84		69	0.160839	0.167476	0.128731
695.954	1235.57	1200.87		70	0.16317	0.169903	0.130597
699.843	1238.86	1202.08		71	0.165501	0.17233	0.132463
710.956	1247.52	1204.61		72	0.167832	0.174757	0.134328
715.169	1259.31	1212.35		73	0.170163	0.177184	0.136194
717.362	1260	1213.38		74	0.172494	0.179612	0.13806
720.193	1274.28	1216.53		75	0.174825	0.182039	0.139925
723.981	1280.26	1222.86		76	0.177156	0.184466	0.141791
726.198	1282.35	1228.97		77	0.179487	0.186893	0.143657
738.018	1284.93	1228.99		78	0.181818	0.18932	0.145522
739.296	1288.08	1229.24		79	0.184149	0.191748	0.147388
739.609	1288.74	1235.09		80	0.18648	0.194175	0.149254
741.393	1291.16	1239.95		81	0.188811	0.196602	0.151119
742.883	1292.4	1251.5		82	0.191142	0.199029	0.152985
745.425	1297.2	1259.87		83	0.193473	0.201456	0.154851
746.569	1304.2	1264.26		84	0.195804	0.203883	0.156716
749.189	1306.76	1267.76		85	0.198135	0.206311	0.158582
752.909	1308.1	1268.31		86	0.200466	0.208738	0.160448
753.586	1317.44	1275.81		87	0.202797	0.211165	0.162313
758.556	1318.14	1284.17		88	0.205128	0.213592	0.164179
759.129	1318.7	1284.3		89	0.207459	0.216019	0.166045
764.488	1324.96	1287.19		90	0.20979	0.218447	0.16791
766.889	1330.35	1287.76		91	0.212121	0.220874	0.169776
776.107	1331.92	1300.77		92	0.214452	0.223301	0.171642
777.942	1336.73	1306.1		93	0.216783	0.225728	0.173507
778.597	1340.49	1311.24		94	0.219114	0.228155	0.175373
781.029	1342.36	1317.69		95	0.221445	0.230583	0.177239
781.769	1344.61	1318.13		96	0.223776	0.23301	0.179104
787.07	1350.82	1318.43		97	0.226107	0.235437	0.18097
788.713	1356.62	1320.29		98	0.228438	0.237864	0.182836
792.889	1360	1323.42		99	0.230769	0.240291	0.184701
794.048	1360.06	1325.44		100	0.2331	0.242718	0.186567
794.519	1364.59	1325.45		101	0.235431	0.245146	0.188433
796.373	1366.17	1327.37		102	0.237762	0.247573	0.190299
797.935	1366.29	1336.75		103	0.240093	0.25	0.192164
798.593	1367.67	1349.84		104	0.242424	0.252427	0.19403
801.406	1372.59	1351.9		105	0.244755	0.254854	0.195896
806.312	1375.31	1359.57		106	0.247086	0.257282	0.197761
808.44	1378.73	1360.51		107	0.249417	0.259709	0.199627
811.516	1379.8	1361.3		108	0.251748	0.262136	0.201493
811.517	1387.68	1361.53		109	0.254079	0.264563	0.203358
813.666	1391.06	1364.32		110	0.25641	0.26699	0.205224
814.007	1396.17	1372.71		111	0.258741	0.269417	0.20709
821.771	1399.38	1375.3		112	0.261072	0.271845	0.208955
824.764	1414.68	1380.51		113	0.263403	0.274272	0.210821
835.784	1418.92	1381.46		114	0.265734	0.276699	0.212687
835.898	1421.22	1382.85		115	0.268065	0.279126	0.214552
837.241	1424.38	1394.17		116	0.270396	0.281553	0.216418
838.285	1429.05	1398.67		117	0.272727	0.283981	0.218284
849.206	1431.91	1401.98		118	0.275058	0.286408	0.220149
850.911	1433.99	1402.29		119	0.277389	0.288835	0.222015
852.439	1435.4	1403.54		120	0.27972	0.291262	0.223881
852.479	1436.82	1403.71		121	0.282051	0.293689	0.225746
854.305	1438.34	1406.64		122	0.284382	0.296117	0.227612
855.352	1438.62	1407.89		123	0.286713	0.298544	0.229478
857.754	1440.01	1414.54		124	0.289044	0.300971	0.231343
867.722	1442.2	1428.44		125	0.291375	0.303398	0.233209
871.907	1443.22	1428.84		126	0.293706	0.305825	0.235075
872.21	1448.94	1436.57		127	0.296037	0.308252	0.23694
874.638	1451.75	1447.68		128	0.298368	0.31068	0.238806
878.625	1452.14	1454.38		129	0.300699	0.313107	0.240672
881.312	1452.34	1457.47		130	0.30303	0.315534	0.242537
882.297	1456.99	1465.81		131	0.305361	0.317961	0.244403
892.749	1457.79	1466.03		132	0.307692	0.320388	0.246269
894.517	1462.21	1470.22		133	0.310023	0.322816	0.248134
895.065	1462.62	1474.19		134	0.312354	0.325243	0.25
895.177	1466.43	1474.58		135	0.314685	0.32767	0.251866
896.706	1471.97	1485.16		136	0.317016	0.330097	0.253731
897.981	1472.74	1487.5		137	0.319347	0.332524	0.255597
899.774	1486.79	1489.56		138	0.321678	0.334951	0.257463
900.252	1491.32	1500.69		139	0.324009	0.337379	0.259328
901.383	1495.47	1507.47		140	0.32634	0.339806	0.261194
906.381	1506.34	1507.81		141	0.328671	0.342233	0.26306
910.908	1511.54	1513.31		142	0.331002	0.34466	0.264925
911.243	1511.57	1517.53		143	0.333333	0.347087	0.266791
912.702	1511.84	1519.15		144	0.335664	0.349515	0.268657
915.417	1512.87	1519.36		145	0.337995	0.351942	0.270522
917.186	1513.96	1531.98		146	0.340326	0.354369	0.272388
919.657	1514.28	1539.12		147	0.342657	0.356796	0.274254
923.446	1516.85	1545.23		148	0.344988	0.359223	0.276119
923.68	1522.52	1551.5		149	0.347319	0.36165	0.277985
923.842	1537.85	1557.38		150	0.34965	0.364078	0.279851
927.297	1570.04	1565.58		151	0.351981	0.366505	0.281716
927.497	1571.5	1569.55		152	0.354312	0.368932	0.283582
930.422	1573.95	1576.94		153	0.356643	0.371359	0.285448
938.92	1590.91	1580.72		154	0.358974	0.373786	0.287313
938.963	1596.47	1590.04		155	0.361305	0.376214	0.289179
942.413	1598.49	1601.79		156	0.363636	0.378641	0.291045
946.231	1603.94	1602.12		157	0.365967	0.381068	0.29291
947.193	1605.39	1606.67		158	0.368298	0.383495	0.294776
956.94	1607.14	1607.25		159	0.370629	0.385922	0.296642
957.735	1610.49	1607.28		160	0.37296	0.38835	0.298507
957.997	1615.14	1608.11		161	0.375291	0.390777	0.300373
958.987	1615.21	1612.76		162	0.377622	0.393204	0.302239
960.679	1621.21	1614.45		163	0.379953	0.395631	0.304104
963.223	1621.84	1616.3		164	0.382284	0.398058	0.30597
973.095	1624.14	1619.83		165	0.384615	0.400485	0.307836
974.711	1626.32	1633		166	0.386946	0.402913	0.309701
977.608	1633.23	1634.51		167	0.389277	0.40534	0.311567
980.224	1649.21	1642.96		168	0.391608	0.407767	0.313433
986.097	1650.55	1643.7		169	0.393939	0.410194	0.315299
986.459	1662.86	1645.74		170	0.39627	0.412621	0.317164
990.823	1664.4	1648.7		171	0.398601	0.415049	0.31903
991.332	1665.81	1650.58		172	0.400932	0.417476	0.320896
992.815	1675.81	1654.83		173	0.403263	0.419903	0.322761
993.764	1683.24	1655.83		174	0.405594	0.42233	0.324627
999.163	1685.28	1656.94		175	0.407925	0.424757	0.326493
1001.34	1687.1	1658.12		176	0.410256	0.427184	0.328358
1001.73	1693.17	1658.23		177	0.412587	0.429612	0.330224
1006.77	1693.22	1663.01		178	0.414918	0.432039	0.33209
1017.83	1693.42	1684.69		179	0.417249	0.434466	0.333955
1021.92	1693.93	1686.08		180	0.41958	0.436893	0.335821
1026.27	1707.55	1687.51		181	0.421911	0.43932	0.337687
1028.36	1709.91	1690.98		182	0.424242	0.441748	0.339552
1028.38	1714.22	1693.01		183	0.426573	0.444175	0.341418
1030.41	1731.22	1695.18		184	0.428904	0.446602	0.343284
1037.59	1734.69	1698.63		185	0.431235	0.449029	0.345149
1040.51	1740.12	1703.83		186	0.433566	0.451456	0.347015
1044.41	1740.98	1712.8		187	0.435897	0.453883	0.348881
1045.62	1747.81	1720.16		188	0.438228	0.456311	0.350746
1047.48	1751.18	1736.88		189	0.440559	0.458738	0.352612
1049	1755.98	1744.62		190	0.44289	0.461165	0.354478
1057.27	1761.81	1761.87		191	0.445221	0.463592	0.356343
1059.77	1764.32	1766.44		192	0.447552	0.466019	0.358209
1061.63	1772.19	1769.08		193	0.449883	0.468447	0.360075
1063.13	1778.32	1770.11		194	0.452214	0.470874	0.36194
1069.78	1778.6	1782.85		195	0.454545	0.473301	0.363806
1069.82	1791.38	1787.49		196	0.456876	0.475728	0.365672
1071.24	1791.78	1800.71		197	0.459207	0.478155	0.367537
1076.42	1795.89	1801.72		198	0.461538	0.480583	0.369403
1076.81	1833.11	1811.13		199	0.463869	0.48301	0.371269
1078.68	1840.11	1816.44		200	0.4662	0.485437	0.373134
1078.95	1858.16	1822.94		201	0.468531	0.487864	0.375
1082.35	1859.01	1823.13		202	0.470862	0.490291	0.376866
1084.5	1869.84	1823.28		203	0.473193	0.492718	0.378731
1085.48	1880.7	1827.8		204	0.475524	0.495146	0.380597
1091.27	1885.61	1829.65		205	0.477855	0.497573	0.382463
1091.68	1888.73	1837.46		206	0.480186	0.5	0.384328
1096.04	1896.89	1837.66		207	0.482517	0.502427	0.386194
1100.38	1902.1	1847.82		208	0.484848	0.504854	0.38806
1102.67	1904.59	1853.49		209	0.487179	0.507282	0.389925
1103.81	1904.9	1853.84		210	0.48951	0.509709	0.391791
1105.84	1907.04	1857.25		211	0.491841	0.512136	0.393657
1107.07	1913.15	1860.93		212	0.494172	0.514563	0.395522
1108.07	1915.74	1863.57		213	0.496503	0.51699	0.397388
1113.28	1920.64	1873.54		214	0.498834	0.519417	0.399254
1115.53	1920.75	1880.86		215	0.501166	0.521845	0.401119
1116.58	1927.95	1885		216	0.503497	0.524272	0.402985
1119.62	1929	1904.19		217	0.505828	0.526699	0.404851
1121.56	1932.75	1905.04		218	0.508159	0.529126	0.406716
1127.75	1937.79	1913.19		219	0.51049	0.531553	0.408582
1128.71	1942.19	1917.92		220	0.512821	0.533981	0.410448
1133.27	1947.08	1921.73		221	0.515152	0.536408	0.412313
1134.5	1964.8	1940.21		222	0.517483	0.538835	0.414179
1135.11	1967.99	1952.07		223	0.519814	0.541262	0.416045
1141.49	1977.15	1958.82		224	0.522145	0.543689	0.41791
1143.94	1983.52	1961.83		225	0.524476	0.546117	0.419776
1146.17	1984.07	1990.02		226	0.526807	0.548544	0.421642
1148.89	1984.99	1991.93		227	0.529138	0.550971	0.423507
1154.74	1985.87	2008.6		228	0.531469	0.553398	0.425373
1156.87	1986.4	2016.72		229	0.5338	0.555825	0.427239
1157.78	1988.38	2022.75		230	0.536131	0.558252	0.429104
1159.45	1995.89	2026.04		231	0.538462	0.56068	0.43097
1159.96	1998.84	2036.72		232	0.540793	0.563107	0.432836
1164.84	2011.42	2037.78		233	0.543124	0.565534	0.434701
1168.55	2027.53	2043.38		234	0.545455	0.567961	0.436567
1171.55	2027.85	2045.59		235	0.547786	0.570388	0.438433
1173.69	2034.47	2055.73		236	0.550117	0.572816	0.440299
1173.75	2035.35	2059.29		237	0.552448	0.575243	0.442164
1174.39	2046.75	2063.5		238	0.554779	0.57767	0.44403
1175.6	2047.97	2065.4		239	0.55711	0.580097	0.445896
1182.56	2052	2087.3		240	0.559441	0.582524	0.447761
1184.36	2055.02	2088.44		241	0.561772	0.584951	0.449627
1184.68	2055.57	2092.12		242	0.564103	0.587379	0.451493
1186.19	2056.43	2101.38		243	0.566434	0.589806	0.453358
1188.01	2061.12	2106.56		244	0.568765	0.592233	0.455224
1199	2063.74	2117.68		245	0.571096	0.59466	0.45709
1202.36	2077.11	2125.79		246	0.573427	0.597087	0.458955
1202.47	2078.21	2155.55		247	0.575758	0.599515	0.460821
1206.24	2079.17	2163.92		248	0.578089	0.601942	0.462687
1212.09	2079.75	2167.47		249	0.58042	0.604369	0.464552
1218.72	2084.11	2171.9		250	0.582751	0.606796	0.466418
1218.93	2088.01	2174.55		251	0.585082	0.609223	0.468284
1221.93	2089.74	2184.26		252	0.587413	0.61165	0.470149
1228.47	2100.89	2186.22		253	0.589744	0.614078	0.472015
1231.26	2104.22	2186.84		254	0.592075	0.616505	0.473881
1234.76	2129.97	2196.99		255	0.594406	0.618932	0.475746
1237.36	2146.65	2197.74		256	0.596737	0.621359	0.477612
1239.95	2147.37	2198.93		257	0.599068	0.623786	0.479478
1240.64	2152.78	2199.1		258	0.601399	0.626214	0.481343
1241.46	2157.68	2201.47		259	0.60373	0.628641	0.483209
1242.42	2159.45	2210.16		260	0.606061	0.631068	0.485075
1246.47	2178.34	2214.54		261	0.608392	0.633495	0.48694
1249.22	2184.09	2215.8		262	0.610723	0.635922	0.488806
1271.14	2184.48	2235.56		263	0.613054	0.63835	0.490672
1272.44	2185.44	2236.28		264	0.615385	0.640777	0.492537
1272.69	2187.91	2257		265	0.617716	0.643204	0.494403
1280.1	2189.08	2264.13		266	0.620047	0.645631	0.496269
1281.6	2209.45	2265.29		267	0.622378	0.648058	0.498134
1285.62	2218.28	2265.53		268	0.624709	0.650485	0.5
1289.21	2219.72	2266.94		269	0.62704	0.652913	0.501866
1290.54	2225.18	2270.06		270	0.629371	0.65534	0.503731
1296.12	2230.45	2274.39		271	0.631702	0.657767	0.505597
1297.14	2241.78	2275.24		272	0.634033	0.660194	0.507463
1306.19	2242.44	2275.74		273	0.636364	0.662621	0.509328
1308.23	2246.65	2279.12		274	0.638695	0.665049	0.511194
1313.36	2247.27	2283.95		275	0.641026	0.667476	0.51306
1314.37	2250.66	2286.89		276	0.643357	0.669903	0.514925
1318.13	2256.38	2291.63		277	0.645688	0.67233	0.516791
1318.16	2258.88	2299.17		278	0.648019	0.674757	0.518657
1320.91	2263.57	2302.18		279	0.65035	0.677184	0.520522
1323.55	2268.64	2309.57		280	0.652681	0.679612	0.522388
1330.27	2276.09	2309.76		281	0.655012	0.682039	0.524254
1331.66	2287.21	2310.63		282	0.657343	0.684466	0.526119
1334.02	2299.4	2313.23		283	0.659674	0.686893	0.527985
1335.79	2310.63	2313.67		284	0.662005	0.68932	0.529851
1341.55	2319.06	2315.31		285	0.664336	0.691748	0.531716
1343.04	2321.49	2337.51		286	0.666667	0.694175	0.533582
1347.89	2323.21	2339.29		287	0.668998	0.696602	0.535448
1362.14	2332.1	2346.42		288	0.671329	0.699029	0.537313
1365.46	2350.33	2352.1		289	0.67366	0.701456	0.539179
1366.62	2363.67	2356.57		290	0.675991	0.703883	0.541045
1370.35	2382.07	2360.29		291	0.678322	0.706311	0.54291
1371.83	2384.84	2367.96		292	0.680653	0.708738	0.544776
1375.69	2395.78	2373.93		293	0.682984	0.711165	0.546642
1384.53	2397.32	2380		294	0.685315	0.713592	0.548507
1386.24	2398.94	2400.95		295	0.687646	0.716019	0.550373
1390.76	2407.27	2408.85		296	0.689977	0.718447	0.552239
1395.89	2409.28	2414.06		297	0.692308	0.720874	0.554104
1415.81	2418.56	2414.38		298	0.694639	0.723301	0.55597
1417.22	2425.15	2414.61		299	0.69697	0.725728	0.557836
1417.78	2430.07	2419.74		300	0.699301	0.728155	0.559701
1426.31	2430.12	2420.61		301	0.701632	0.730583	0.561567
1429.24	2430.28	2427.48		302	0.703963	0.73301	0.563433
1430.48	2440.53	2429.24		303	0.706294	0.735437	0.565299
1435.05	2442.45	2444.92		304	0.708625	0.737864	0.567164
1440.08	2457.38	2448		305	0.710956	0.740291	0.56903
1441.39	2467.02	2456.98		306	0.713287	0.742718	0.570896
1446.45	2468.13	2471.92		307	0.715618	0.745146	0.572761
1447.58	2477.82	2479.66		308	0.717949	0.747573	0.574627
1451.94	2497.17	2480.76		309	0.72028	0.75	0.576493
1453.24	2505.11	2488.78		310	0.722611	0.752427	0.578358
1458.34	2522.2	2495.53		311	0.724942	0.754854	0.580224
1459.3	2531.64	2502.41		312	0.727273	0.757282	0.58209
1461.64	2542.61	2503.89		313	0.729604	0.759709	0.583955
1462.54	2552.43	2507.36		314	0.731935	0.762136	0.585821
1462.54	2553.85	2511.56		315	0.734266	0.764563	0.587687
1465.63	2555.43	2514.41		316	0.736597	0.76699	0.589552
1470.23	2572.11	2514.88		317	0.738928	0.769417	0.591418
1472.05	2582.99	2522.61		318	0.741259	0.771845	0.593284
1475.23	2584.13	2529.73		319	0.74359	0.774272	0.595149
1477.32	2595.24	2532.07		320	0.745921	0.776699	0.597015
1478.57	2596.09	2538.18		321	0.748252	0.779126	0.598881
1480.13	2608.11	2543.44		322	0.750583	0.781553	0.600746
1480.98	2610.77	2552.36		323	0.752914	0.783981	0.602612
1485.05	2614.44	2577.11		324	0.755245	0.786408	0.604478
1500.86	2617.82	2591.82		325	0.757576	0.788835	0.606343
1502.51	2646.43	2594.03		326	0.759907	0.791262	0.608209
1503.52	2660.03	2610.99		327	0.762238	0.793689	0.610075
1514.18	2666.83	2617.34		328	0.764569	0.796117	0.61194
1515.77	2667.08	2622.6		329	0.7669	0.798544	0.613806
1524.16	2668.46	2637.44		330	0.769231	0.800971	0.615672
1544.88	2699.89	2647.13		331	0.771562	0.803398	0.617537
1547.63	2728.24	2653.07		332	0.773893	0.805825	0.619403
1572.95	2730.42	2655.75		333	0.776224	0.808252	0.621269
1576.54	2742.84	2662.93		334	0.778555	0.81068	0.623134
1590.68	2770.36	2669.54		335	0.780886	0.813107	0.625
1593.64	2775.53	2669.88		336	0.783217	0.815534	0.626866
1601.83	2790.36	2679.87		337	0.785548	0.817961	0.628731
1615.14	2824.59	2680.39		338	0.787879	0.820388	0.630597
1616.88	2841.46	2700.72		339	0.79021	0.822816	0.632463
1626.39	2852.5	2703.41		340	0.792541	0.825243	0.634328
1627.89	2858.86	2706.7		341	0.794872	0.82767	0.636194
1628.67	2861.13	2707.48		342	0.797203	0.830097	0.63806
1630.84	2867.47	2710.64		343	0.799534	0.832524	0.639925
1640.27	2871.01	2710.74		344	0.801865	0.834951	0.641791
1643.9	2873.88	2718.11		345	0.804196	0.837379	0.643657
1660.35	2879.88	2719.75		346	0.806527	0.839806	0.645522
1663.79	2883.41	2728.22		347	0.808858	0.842233	0.647388
1689.19	2945.18	2733.05		348	0.811189	0.84466	0.649254
1690.11	2953.15	2733.77		349	0.81352	0.847087	0.651119
1694.1	2956.82	2738.49		350	0.815851	0.849515	0.652985
1697.01	2962.42	2742.45		351	0.818182	0.851942	0.654851
1704.43	2976.93	2749.3		352	0.820513	0.854369	0.656716
1733.32	3001.75	2755.68		353	0.822844	0.856796	0.658582
1736.24	3006.03	2758.33		354	0.825175	0.859223	0.660448
1739.02	3025.99	2758.9		355	0.827506	0.86165	0.662313
1739.93	3026.6	2764		356	0.829837	0.864078	0.664179
1747.91	3039.89	2774.26		357	0.832168	0.866505	0.666045
1769.1	3039.97	2779.71		358	0.834499	0.868932	0.66791
1778.33	3051.3	2782.21		359	0.83683	0.871359	0.669776
1785.76	3055.24	2804.98		360	0.839161	0.873786	0.671642
1799.83	3067.38	2816.39		361	0.841492	0.876214	0.673507
1806.99	3078.82	2823.29		362	0.843823	0.878641	0.675373
1807.38	3093.74	2824.71		363	0.846154	0.881068	0.677239
1808.38	3100.38	2826.72		364	0.848485	0.883495	0.679104
1809.96	3128.01	2838.22		365	0.850816	0.885922	0.68097
1810.44	3189.13	2848.18		366	0.853147	0.88835	0.682836
1816.24	3196.49	2864.84		367	0.855478	0.890777	0.684701
1825.85	3233.7	2900.66		368	0.857809	0.893204	0.686567
1835.21	3239.2	2900.99		369	0.86014	0.895631	0.688433
1836.72	3247.22	2902.79		370	0.862471	0.898058	0.690299
1840.12	3252.18	2914.45		371	0.864802	0.900485	0.692164
1846.05	3302.45	2919.1		372	0.867133	0.902913	0.69403
1862.53	3331.7	2919.95		373	0.869464	0.90534	0.695896
1873.74	3365.78	2926.2		374	0.871795	0.907767	0.697761
1882.45	3373.48	2944.54		375	0.874126	0.910194	0.699627
1888.72	3378.91	2953.4		376	0.876457	0.912621	0.701493
1893.53	3383.48	2963.38		377	0.878788	0.915049	0.703358
1897.33	3406.13	2966.74		378	0.881119	0.917476	0.705224
1916.43	3421.39	2975.75		379	0.88345	0.919903	0.70709
1922.55	3441.08	2986.21		380	0.885781	0.92233	0.708955
1935.22	3445.76	2993.48		381	0.888112	0.924757	0.710821
1954.33	3447.46	2997.71		382	0.890443	0.927184	0.712687
1963.53	3456.22	3005.86		383	0.892774	0.929612	0.714552
1992.45	3458.41	3015.38		384	0.895105	0.932039	0.716418
2004.44	3459.42	3015.64		385	0.897436	0.934466	0.718284
2006.18	3520.74	3025.01		386	0.899767	0.936893	0.720149
2035.17	3542.23	3028.22		387	0.902098	0.93932	0.722015
2041.14	3560.29	3042.33		388	0.904429	0.941748	0.723881
2093.97	3622.7	3057.63		389	0.90676	0.944175	0.725746
2094.29	3662.78	3060.02		390	0.909091	0.946602	0.727612
2099.95	3675.01	3062.38		391	0.911422	0.949029	0.729478
2124.8	3704.57	3078.91		392	0.913753	0.951456	0.731343
2143.62	3706.53	3082.4		393	0.916084	0.953883	0.733209
2144.16	3765.01	3097.03		394	0.918415	0.956311	0.735075
2165.19	3785.38	3105.4		395	0.920746	0.958738	0.73694
2172.53	3787.23	3109.35		396	0.923077	0.961165	0.738806
2185.59	3795.76	3140.42		397	0.925408	0.963592	0.740672
2203.45	3799.26	3140.69		398	0.927739	0.966019	0.742537
2205.71	3843.1	3142.13		399	0.93007	0.968447	0.744403
2214.57	3897.1	3158.61		400	0.932401	0.970874	0.746269
2225.28	3927.25	3183.76		401	0.934732	0.973301	0.748134
2241.2	3957.19	3197.4		402	0.937063	0.975728	0.75
2245.69	4013	3199.05		403	0.939394	0.978155	0.751866
2250.6	4014.07	3205.81		404	0.941725	0.980583	0.753731
2251.4	4107.53	3211.83		405	0.944056	0.98301	0.755597
2271.93	4136.94	3216.82		406	0.946387	0.985437	0.757463
2296.75	4186.6	3218.12		407	0.948718	0.987864	0.759328
2324.82	4369.61	3221.12		408	0.951049	0.990291	0.761194
2335.09	4499.89	3223.84		409	0.95338	0.992718	0.76306
2370.74	4511.74	3226.37		410	0.955711	0.995146	0.764925
2432.3	4553.64	3234.11		411	0.958042	0.997573	0.766791
2459.02	5027.48	3234.44		412	0.960373	1	0.768657
2485.29		3250.38		413	0.962704		0.770522
2524.59		3253.65		414	0.965035		0.772388
2525.26		3262.41		415	0.967366		0.774254
2564.6		3270.94		416	0.969697		0.776119
2610.82		3274.09		417	0.972028		0.777985
2666.18		3274.75		418	0.974359		0.779851
2805.67		3301.82		419	0.97669		0.781716
2807.89		3319.26		420	0.979021		0.783582
2835.82		3321.68		421	0.981352		0.785448
2848.7		3326.75		422	0.983683		0.787313
2917.26		3340.26		423	0.986014		0.789179
3000.78		3341.52		424	0.988345		0.791045
3130.36		3349.74		425	0.990676		0.79291
3549.41		3359.69		426	0.993007		0.794776
3589.68		3375.04		427	0.995338		0.796642
4072.09		3376.27		428	0.997669		0.798507
4294.17		3379.77		429	1		0.800373
		3390.78		430			0.802239
		3403.24		431			0.804104
		3415.13		432			0.80597
		3417.64		433			0.807836
		3424.7		434			0.809701
		3425.97		435			0.811567
		3456.85		436			0.813433
		3472.03		437			0.815299
		3487.41		438			0.817164
		3487.76		439			0.81903
		3491.93		440			0.820896
		3494.36		441			0.822761
		3504.6		442			0.824627
		3514.83		443			0.826493
		3516.43		444			0.828358
		3529.33		445			0.830224
		3533.76		446			0.83209
		3536.85		447			0.833955
		3603.84		448			0.835821
		3610.8		449			0.837687
		3619.89		450			0.839552
		3632.23		451			0.841418
		3657.72		452			0.843284
		3675.2		453			0.845149
		3677.31		454			0.847015
		3682.38		455			0.848881
		3690.86		456			0.850746
		3701.08		457			0.852612
		3702.12		458			0.854478
		3708.02		459			0.856343
		3708.95		460			0.858209
		3709.79		461			0.860075
		3719.51		462			0.86194
		3730.58		463			0.863806
		3741.82		464			0.865672
		3764.42		465			0.867537
		3775.65		466			0.869403
		3798.95		467			0.871269
		3802.58		468			0.873134
		3808.54		469			0.875
		3855.89		470			0.876866
		3872.51		471			0.878731
		3875.12		472			0.880597
		3877.53		473			0.882463
		3894.78		474			0.884328
		3898.76		475			0.886194
		3910.86		476			0.88806
		3915.95		477			0.889925
		3920.09		478			0.891791
		3958.38		479			0.893657
		3963.37		480			0.895522
		3998.85		481			0.897388
		4013.14		482			0.899254
		4034.8		483			0.901119
		4043.23		484			0.902985
		4047.14		485			0.904851
		4052.85		486			0.906716
		4077.97		487			0.908582
		4091.62		488			0.910448
		4143.66		489			0.912313
		4218.45		490			0.914179
		4230.75		491			0.916045
		4240.39		492			0.91791
		4258.33		493			0.919776
		4270.4		494			0.921642
		4284.68		495			0.923507
		4296.3		496			0.925373
		4304.1		497			0.927239
		4312.66		498			0.929104
		4338.52		499			0.93097
		4355.41		500			0.932836
		4390.01		501			0.934701
		4407.48		502			0.936567
		4572.98		503			0.938433
		4591.68		504			0.940299
		4593.74		505			0.942164
		4607.6		506			0.94403
		4681.5		507			0.945896
		4705.45		508			0.947761
		4884.28		509			0.949627
		4926.38		510			0.951493
		5094.9		511			0.953358
		5119.76		512			0.955224
		5143.28		513			0.95709
		5169.69		514			0.958955
		5262.06		515			0.960821
		5285.84		516			0.962687
		5333.56		517			0.964552
		5335.26		518			0.966418
		5343.41		519			0.968284
		5452.88		520			0.970149
		5497.79		521			0.972015
		5501.96		522			0.973881
		5649.63		523			0.975746
		5802.34		524			0.977612
		5833.81		525			0.979478
		5837.08		526			0.981343
		5910.42		527			0.983209
		6012.53		528			0.985075
		6160.28		529			0.98694
		6247.94		530			0.988806
		6434.16		531			0.990672
		6686.85		532			0.992537
		6738.93		533			0.994403
		6812.3		534			0.996269
		6812.34		535			0.998134
		6863.47		536			1

## Sheet: Fig 3C
K144Q
20	70	0 Ca			Cum. Prob. 20	Cum. Prob. 70	Cum. Prob. 0 Ca
226.889	377.504	706.763		1	0.00265252	0.00302115	0.00190476
309.683	399.582	715.568		2	0.00530504	0.0060423	0.00380952
316.953	483.579	776.965		3	0.00795756	0.00906344	0.00571429
382.404	600.763	777.274		4	0.0106101	0.0120846	0.00761905
389.027	644.763	848.54		5	0.0132626	0.0151057	0.00952381
409.862	660.899	895.191		6	0.0159151	0.0181269	0.0114286
417.079	685.38	925.828		7	0.0185676	0.021148	0.0133333
420.467	700.342	929.963		8	0.0212202	0.0241692	0.0152381
423.24	703.206	945.667		9	0.0238727	0.0271903	0.0171429
427.146	718.332	947.391		10	0.0265252	0.0302115	0.0190476
442.183	745.726	991.622		11	0.0291777	0.0332326	0.0209524
446.626	747.221	1026.52		12	0.0318302	0.0362538	0.0228571
455.943	751.089	1047.58		13	0.0344828	0.0392749	0.0247619
459.681	767.769	1051.41		14	0.0371353	0.0422961	0.0266667
481.977	799.138	1067.67		15	0.0397878	0.0453172	0.0285714
482.574	802.182	1073.56		16	0.0424403	0.0483384	0.0304762
492.724	803.387	1074.74		17	0.0450928	0.0513595	0.032381
501.226	804.489	1076.46		18	0.0477454	0.0543807	0.0342857
512.014	815.097	1090.36		19	0.0503979	0.0574018	0.0361905
514.048	819.325	1097.49		20	0.0530504	0.060423	0.0380952
514.229	835.004	1122.38		21	0.0557029	0.0634441	0.04
525.294	844.572	1128.04		22	0.0583554	0.0664653	0.0419048
525.786	848.509	1130.06		23	0.061008	0.0694864	0.0438095
535.997	868.851	1132.06		24	0.0636605	0.0725076	0.0457143
540.009	872.387	1133.36		25	0.066313	0.0755287	0.047619
544.479	876.58	1136.86		26	0.0689655	0.0785498	0.0495238
550.325	887.015	1143.31		27	0.071618	0.081571	0.0514286
567.456	901.848	1146.36		28	0.0742706	0.0845921	0.0533333
581.727	913.384	1146.4		29	0.0769231	0.0876133	0.0552381
594.956	927.399	1152.62		30	0.0795756	0.0906344	0.0571429
599.844	928.931	1152.99		31	0.0822281	0.0936556	0.0590476
605.504	936.462	1162.8		32	0.0848806	0.0966767	0.0609524
615.451	936.912	1162.83		33	0.0875332	0.0996979	0.0628571
618.375	949.027	1165.59		34	0.0901857	0.102719	0.0647619
618.467	951.321	1178.42		35	0.0928382	0.10574	0.0666667
624.679	959.427	1178.83		36	0.0954907	0.108761	0.0685714
626.438	969.006	1179.96		37	0.0981432	0.111782	0.0704762
629.89	988.437	1180.98		38	0.100796	0.114804	0.072381
637.976	989.789	1187.82		39	0.103448	0.117825	0.0742857
638.494	993.122	1189.39		40	0.106101	0.120846	0.0761905
647.493	1004.54	1213.36		41	0.108753	0.123867	0.0780952
652.505	1018.02	1216.56		42	0.111406	0.126888	0.08
653.355	1022.53	1225.29		43	0.114058	0.129909	0.0819048
659.474	1027.92	1231.66		44	0.116711	0.132931	0.0838095
659.602	1033.66	1232.49		45	0.119363	0.135952	0.0857143
659.94	1040.19	1238.64		46	0.122016	0.138973	0.087619
662.855	1051.86	1241.54		47	0.124668	0.141994	0.0895238
682.836	1055.45	1248.05		48	0.127321	0.145015	0.0914286
685.095	1065.18	1252.17		49	0.129973	0.148036	0.0933333
694.634	1065.39	1254.29		50	0.132626	0.151057	0.0952381
697.612	1066.02	1257.34		51	0.135279	0.154079	0.0971429
697.841	1070.36	1257.93		52	0.137931	0.1571	0.0990476
706.657	1073.42	1268.1		53	0.140584	0.160121	0.100952
716.904	1073.75	1275.06		54	0.143236	0.163142	0.102857
719.716	1075	1280.53		55	0.145889	0.166163	0.104762
722.409	1080.7	1283.07		56	0.148541	0.169184	0.106667
722.986	1083.41	1290.74		57	0.151194	0.172205	0.108571
734.237	1085.89	1291.28		58	0.153846	0.175227	0.110476
740.831	1088.55	1294.09		59	0.156499	0.178248	0.112381
746.421	1092.02	1315.28		60	0.159151	0.181269	0.114286
757.673	1100.04	1321.23		61	0.161804	0.18429	0.11619
762.1	1108.89	1338.8		62	0.164456	0.187311	0.118095
762.685	1109.73	1341.46		63	0.167109	0.190332	0.12
763.035	1112.56	1342.64		64	0.169761	0.193353	0.121905
768.664	1127.85	1343.74		65	0.172414	0.196375	0.12381
769.819	1135.06	1348.19		66	0.175066	0.199396	0.125714
780.426	1137.88	1348.23		67	0.177719	0.202417	0.127619
780.657	1138.79	1349.23		68	0.180371	0.205438	0.129524
783.928	1145.68	1354.13		69	0.183024	0.208459	0.131429
788.946	1146.57	1357.91		70	0.185676	0.21148	0.133333
789.683	1152.75	1357.99		71	0.188329	0.214502	0.135238
790.14	1172.43	1363.25		72	0.190981	0.217523	0.137143
794.524	1176.24	1369.72		73	0.193634	0.220544	0.139048
800.188	1177.13	1370.49		74	0.196286	0.223565	0.140952
810.342	1183.13	1372.39		75	0.198939	0.226586	0.142857
814.051	1188.85	1376.13		76	0.201592	0.229607	0.144762
815.002	1195.16	1376.15		77	0.204244	0.232628	0.146667
819.264	1200.96	1380.53		78	0.206897	0.23565	0.148571
829.697	1206.86	1381.8		79	0.209549	0.238671	0.150476
831.125	1209.51	1383.82		80	0.212202	0.241692	0.152381
832.958	1209.6	1387.23		81	0.214854	0.244713	0.154286
839.184	1212.89	1391.74		82	0.217507	0.247734	0.15619
839.727	1213.49	1393.29		83	0.220159	0.250755	0.158095
841.928	1215.38	1393.42		84	0.222812	0.253776	0.16
848.181	1216.11	1396.24		85	0.225464	0.256798	0.161905
853.452	1218.91	1398.38		86	0.228117	0.259819	0.16381
855.63	1225.37	1406.07		87	0.230769	0.26284	0.165714
860.81	1231.49	1406.42		88	0.233422	0.265861	0.167619
861.192	1239.24	1411.48		89	0.236074	0.268882	0.169524
863.844	1245.96	1421.87		90	0.238727	0.271903	0.171429
864.1	1253.81	1428.97		91	0.241379	0.274924	0.173333
867.139	1260.01	1431.71		92	0.244032	0.277946	0.175238
868.367	1260.87	1448.38		93	0.246684	0.280967	0.177143
869.86	1263.99	1453.17		94	0.249337	0.283988	0.179048
873.561	1264.44	1453.48		95	0.251989	0.287009	0.180952
874.973	1264.81	1453.94		96	0.254642	0.29003	0.182857
875.73	1272.34	1457.85		97	0.257294	0.293051	0.184762
877.916	1283.57	1460.29		98	0.259947	0.296073	0.186667
879.621	1291.31	1466.94		99	0.262599	0.299094	0.188571
882.964	1298.58	1468.41		100	0.265252	0.302115	0.190476
887.083	1309.88	1469.21		101	0.267905	0.305136	0.192381
888.563	1322.58	1469.35		102	0.270557	0.308157	0.194286
894.568	1328.32	1470.42		103	0.27321	0.311178	0.19619
895.702	1341.78	1473.46		104	0.275862	0.314199	0.198095
895.71	1351.06	1474.33		105	0.278515	0.317221	0.2
895.998	1351.33	1475.95		106	0.281167	0.320242	0.201905
900.212	1352.06	1476.22		107	0.28382	0.323263	0.20381
908.729	1358.8	1478.74		108	0.286472	0.326284	0.205714
914.062	1367.58	1489.65		109	0.289125	0.329305	0.207619
915.6	1370.97	1494.42		110	0.291777	0.332326	0.209524
917.422	1377.12	1498.08		111	0.29443	0.335347	0.211429
918.241	1378.44	1498.89		112	0.297082	0.338369	0.213333
920.15	1379.07	1499.78		113	0.299735	0.34139	0.215238
929.734	1385.32	1500.78		114	0.302387	0.344411	0.217143
930.953	1388.34	1501.14		115	0.30504	0.347432	0.219048
931.51	1393.1	1504.52		116	0.307692	0.350453	0.220952
941.593	1393.86	1504.88		117	0.310345	0.353474	0.222857
943.224	1399.59	1508.68		118	0.312997	0.356495	0.224762
946.053	1401.3	1516.62		119	0.31565	0.359517	0.226667
951.96	1402.8	1521.34		120	0.318302	0.362538	0.228571
960.373	1406.33	1523.64		121	0.320955	0.365559	0.230476
961.341	1407.67	1536.18		122	0.323607	0.36858	0.232381
966.63	1408.45	1537.25		123	0.32626	0.371601	0.234286
967.577	1413.64	1550.88		124	0.328912	0.374622	0.23619
968.471	1425.72	1553.83		125	0.331565	0.377644	0.238095
973.539	1426.77	1555.2		126	0.334218	0.380665	0.24
983.814	1429.86	1567.67		127	0.33687	0.383686	0.241905
985.522	1435.86	1573.41		128	0.339523	0.386707	0.24381
989.079	1448.73	1573.65		129	0.342175	0.389728	0.245714
991.083	1451.24	1581.59		130	0.344828	0.392749	0.247619
992.212	1451.61	1585.26		131	0.34748	0.39577	0.249524
1003.6	1452.75	1588.32		132	0.350133	0.398792	0.251429
1007.4	1455.45	1589.75		133	0.352785	0.401813	0.253333
1007.93	1461.97	1596.04		134	0.355438	0.404834	0.255238
1010.24	1464.47	1597.81		135	0.35809	0.407855	0.257143
1010.91	1469.69	1605.86		136	0.360743	0.410876	0.259048
1012.88	1470.17	1608.9		137	0.363395	0.413897	0.260952
1013.34	1471.55	1611.7		138	0.366048	0.416918	0.262857
1024.34	1484.04	1613.26		139	0.3687	0.41994	0.264762
1027.11	1486.12	1614.1		140	0.371353	0.422961	0.266667
1029.3	1488.34	1619.79		141	0.374005	0.425982	0.268571
1036.76	1489.24	1621.55		142	0.376658	0.429003	0.270476
1037.8	1501.08	1626.87		143	0.37931	0.432024	0.272381
1043.02	1504.77	1629.73		144	0.381963	0.435045	0.274286
1044.34	1505.85	1629.78		145	0.384615	0.438066	0.27619
1047.49	1507.12	1633.75		146	0.387268	0.441088	0.278095
1051.74	1508.69	1635.09		147	0.38992	0.444109	0.28
1053.01	1515.46	1635.73		148	0.392573	0.44713	0.281905
1056.66	1533.27	1639.65		149	0.395225	0.450151	0.28381
1057.81	1533.3	1641.59		150	0.397878	0.453172	0.285714
1061.96	1545.01	1642.78		151	0.400531	0.456193	0.287619
1072.37	1550.08	1643.43		152	0.403183	0.459215	0.289524
1078.06	1552.16	1648.62		153	0.405836	0.462236	0.291429
1078.97	1557	1653.82		154	0.408488	0.465257	0.293333
1079.86	1559.14	1654.13		155	0.411141	0.468278	0.295238
1080.71	1559.31	1655.72		156	0.413793	0.471299	0.297143
1083.54	1570.21	1657.66		157	0.416446	0.47432	0.299048
1085.57	1577.98	1660.06		158	0.419098	0.477341	0.300952
1089.46	1591.47	1660.21		159	0.421751	0.480363	0.302857
1092.07	1605.99	1662.85		160	0.424403	0.483384	0.304762
1097.76	1608.97	1672		161	0.427056	0.486405	0.306667
1098.08	1609.69	1673.89		162	0.429708	0.489426	0.308571
1104.57	1611.9	1675.57		163	0.432361	0.492447	0.310476
1105.51	1630.01	1676.47		164	0.435013	0.495468	0.312381
1105.93	1634.97	1677.07		165	0.437666	0.498489	0.314286
1106.15	1640.05	1681.37		166	0.440318	0.501511	0.31619
1116.22	1642.08	1683.41		167	0.442971	0.504532	0.318095
1124.54	1648.63	1686.71		168	0.445623	0.507553	0.32
1134.3	1650.13	1688.45		169	0.448276	0.510574	0.321905
1142.44	1662.51	1691.16		170	0.450928	0.513595	0.32381
1142.81	1663.15	1694.55		171	0.453581	0.516616	0.325714
1151.3	1675.29	1699		172	0.456233	0.519637	0.327619
1154.73	1679.77	1702.01		173	0.458886	0.522659	0.329524
1157.4	1681.31	1703.62		174	0.461538	0.52568	0.331429
1157.57	1686.11	1707.82		175	0.464191	0.528701	0.333333
1176.8	1687.18	1708.78		176	0.466844	0.531722	0.335238
1182	1695.1	1709.29		177	0.469496	0.534743	0.337143
1188.88	1697.38	1711.12		178	0.472149	0.537764	0.339048
1190.49	1700.27	1712.19		179	0.474801	0.540785	0.340952
1195.86	1704.68	1713.74		180	0.477454	0.543807	0.342857
1197.87	1716.06	1714.38		181	0.480106	0.546828	0.344762
1202.45	1717.09	1724.72		182	0.482759	0.549849	0.346667
1214.18	1727.76	1726.5		183	0.485411	0.55287	0.348571
1216.18	1729.67	1728.22		184	0.488064	0.555891	0.350476
1219.41	1736.2	1728.23		185	0.490716	0.558912	0.352381
1220.48	1736.59	1729.48		186	0.493369	0.561934	0.354286
1220.72	1738.04	1734.04		187	0.496021	0.564955	0.35619
1222.01	1738.32	1734.99		188	0.498674	0.567976	0.358095
1222.48	1744.43	1735.06		189	0.501326	0.570997	0.36
1223.37	1754.55	1737.19		190	0.503979	0.574018	0.361905
1228.74	1764.29	1737.23		191	0.506631	0.577039	0.36381
1232.31	1764.97	1739.95		192	0.509284	0.58006	0.365714
1233.32	1782.32	1743.69		193	0.511936	0.583082	0.367619
1243.21	1789.81	1746.52		194	0.514589	0.586103	0.369524
1246.31	1794.02	1747.12		195	0.517241	0.589124	0.371429
1247.53	1794.25	1760.55		196	0.519894	0.592145	0.373333
1252.79	1829.22	1763.64		197	0.522546	0.595166	0.375238
1254.11	1845.73	1765.57		198	0.525199	0.598187	0.377143
1256.99	1857.93	1767.41		199	0.527851	0.601208	0.379048
1257.13	1868.52	1770.91		200	0.530504	0.60423	0.380952
1270.91	1877.76	1777.85		201	0.533156	0.607251	0.382857
1271.99	1879.24	1782.53		202	0.535809	0.610272	0.384762
1277.14	1886.4	1784.26		203	0.538462	0.613293	0.386667
1283.6	1886.74	1784.77		204	0.541114	0.616314	0.388571
1288.14	1891.1	1788.69		205	0.543767	0.619335	0.390476
1292.07	1893.79	1791.72		206	0.546419	0.622356	0.392381
1292.97	1902.32	1794.32		207	0.549072	0.625378	0.394286
1304.02	1906.94	1795.94		208	0.551724	0.628399	0.39619
1316.78	1907.43	1797.66		209	0.554377	0.63142	0.398095
1318.31	1911.45	1801.93		210	0.557029	0.634441	0.4
1319.4	1914.82	1802.11		211	0.559682	0.637462	0.401905
1327.8	1916.75	1806.89		212	0.562334	0.640483	0.40381
1331.24	1927	1809.15		213	0.564987	0.643505	0.405714
1337.59	1929.24	1813.44		214	0.567639	0.646526	0.407619
1340.21	1930.01	1813.71		215	0.570292	0.649547	0.409524
1344.24	1934.6	1816.38		216	0.572944	0.652568	0.411429
1344.36	1942.41	1817.94		217	0.575597	0.655589	0.413333
1344.36	1942.8	1818.57		218	0.578249	0.65861	0.415238
1350.3	1967.02	1820.6		219	0.580902	0.661631	0.417143
1353.93	1980.32	1826.37		220	0.583554	0.664653	0.419048
1355.55	1983.37	1830.11		221	0.586207	0.667674	0.420952
1356.73	1985.99	1835.05		222	0.588859	0.670695	0.422857
1356.86	1990.82	1835.15		223	0.591512	0.673716	0.424762
1357.71	1996.51	1837.17		224	0.594164	0.676737	0.426667
1369.43	2003.64	1840.35		225	0.596817	0.679758	0.428571
1376.67	2008.49	1842.38		226	0.599469	0.682779	0.430476
1381.82	2016.14	1847.7		227	0.602122	0.685801	0.432381
1381.86	2032.76	1849.57		228	0.604775	0.688822	0.434286
1382.71	2040.55	1850		229	0.607427	0.691843	0.43619
1382.95	2045.05	1850.35		230	0.61008	0.694864	0.438095
1383.6	2046.32	1858.9		231	0.612732	0.697885	0.44
1385.23	2047.64	1865.12		232	0.615385	0.700906	0.441905
1394.79	2049.44	1865.83		233	0.618037	0.703927	0.44381
1395.58	2051.94	1868.39		234	0.62069	0.706949	0.445714
1396.67	2053.01	1879.17		235	0.623342	0.70997	0.447619
1399.97	2058.8	1884.89		236	0.625995	0.712991	0.449524
1405.67	2080.43	1886.55		237	0.628647	0.716012	0.451429
1407.68	2087.95	1886.81		238	0.6313	0.719033	0.453333
1414.32	2106.41	1887.46		239	0.633952	0.722054	0.455238
1416.15	2110.06	1888.24		240	0.636605	0.725076	0.457143
1430.72	2123.85	1890.05		241	0.639257	0.728097	0.459048
1431.16	2128.97	1890.13		242	0.64191	0.731118	0.460952
1462.15	2131.66	1891.57		243	0.644562	0.734139	0.462857
1473.8	2134.03	1893.77		244	0.647215	0.73716	0.464762
1474.84	2140.69	1906.06		245	0.649867	0.740181	0.466667
1476.86	2155.25	1909.66		246	0.65252	0.743202	0.468571
1487.79	2162.48	1910.23		247	0.655172	0.746224	0.470476
1492.64	2168.89	1914.53		248	0.657825	0.749245	0.472381
1501.83	2186.72	1917.56		249	0.660477	0.752266	0.474286
1503.58	2190.38	1921.78		250	0.66313	0.755287	0.47619
1508.86	2210.42	1924.43		251	0.665782	0.758308	0.478095
1513	2234.91	1929.1		252	0.668435	0.761329	0.48
1516.68	2240.86	1929.57		253	0.671088	0.76435	0.481905
1521.66	2247.81	1931.87		254	0.67374	0.767372	0.48381
1525.23	2250.95	1933.84		255	0.676393	0.770393	0.485714
1528.88	2266.69	1936.39		256	0.679045	0.773414	0.487619
1536.48	2270.11	1940.89		257	0.681698	0.776435	0.489524
1538.04	2299.32	1940.92		258	0.68435	0.779456	0.491429
1544.13	2299.55	1943.76		259	0.687003	0.782477	0.493333
1544.74	2305.83	1944.65		260	0.689655	0.785498	0.495238
1555.64	2321.67	1945.3		261	0.692308	0.78852	0.497143
1559.48	2338.89	1949.82		262	0.69496	0.791541	0.499048
1566.3	2359.98	1953.68		263	0.697613	0.794562	0.500952
1568.48	2360.59	1955.46		264	0.700265	0.797583	0.502857
1577.54	2362.56	1955.47		265	0.702918	0.800604	0.504762
1593.86	2363.1	1955.89		266	0.70557	0.803625	0.506667
1594.83	2369.81	1960.46		267	0.708223	0.806647	0.508571
1596.7	2380.22	1962.46		268	0.710875	0.809668	0.510476
1599.87	2384.27	1968.89		269	0.713528	0.812689	0.512381
1609.25	2394.91	1970.72		270	0.71618	0.81571	0.514286
1609.84	2401.84	1973.46		271	0.718833	0.818731	0.51619
1618.86	2406.11	1975.18		272	0.721485	0.821752	0.518095
1627.92	2434.91	1975.75		273	0.724138	0.824773	0.52
1639.52	2443.72	1981.58		274	0.72679	0.827795	0.521905
1641.53	2449.98	1987.27		275	0.729443	0.830816	0.52381
1647.72	2460.85	1988.39		276	0.732095	0.833837	0.525714
1649.64	2461.96	1989.56		277	0.734748	0.836858	0.527619
1649.7	2477.48	1993.39		278	0.737401	0.839879	0.529524
1654.98	2491.53	1994.32		279	0.740053	0.8429	0.531429
1658.63	2515.64	2000.81		280	0.742706	0.845921	0.533333
1660.87	2528.39	2010.7		281	0.745358	0.848943	0.535238
1663.28	2529.82	2018.01		282	0.748011	0.851964	0.537143
1666.12	2548.11	2018.84		283	0.750663	0.854985	0.539048
1672.9	2561.19	2023.46		284	0.753316	0.858006	0.540952
1673.35	2568.1	2028.31		285	0.755968	0.861027	0.542857
1681.13	2572.22	2031.02		286	0.758621	0.864048	0.544762
1684.22	2576.21	2034.83		287	0.761273	0.867069	0.546667
1689.7	2605.32	2038.55		288	0.763926	0.870091	0.548571
1689.9	2620.85	2043.54		289	0.766578	0.873112	0.550476
1698.49	2621.98	2047.61		290	0.769231	0.876133	0.552381
1708.46	2679.41	2049.65		291	0.771883	0.879154	0.554286
1716.8	2679.55	2053.8		292	0.774536	0.882175	0.55619
1722.58	2746.23	2059.44		293	0.777188	0.885196	0.558095
1726.71	2759.61	2064.89		294	0.779841	0.888218	0.56
1727.19	2773.47	2071.3		295	0.782493	0.891239	0.561905
1729.71	2787.23	2072.79		296	0.785146	0.89426	0.56381
1732.48	2805.42	2077.74		297	0.787798	0.897281	0.565714
1744.64	2816.54	2079.78		298	0.790451	0.900302	0.567619
1750.15	2833.36	2089.16		299	0.793103	0.903323	0.569524
1759.38	2839	2091.66		300	0.795756	0.906344	0.571429
1760.98	2852.64	2094.86		301	0.798408	0.909366	0.573333
1768.04	2884.5	2098.82		302	0.801061	0.912387	0.575238
1771.76	2910.47	2099.24		303	0.803714	0.915408	0.577143
1772.88	2918.66	2107.3		304	0.806366	0.918429	0.579048
1779.63	2925.91	2107.59		305	0.809019	0.92145	0.580952
1786.46	2949.95	2109.75		306	0.811671	0.924471	0.582857
1788.43	3044.49	2109.96		307	0.814324	0.927492	0.584762
1790.2	3048.96	2116.4		308	0.816976	0.930514	0.586667
1794.03	3059.02	2125.8		309	0.819629	0.933535	0.588571
1817.03	3059.82	2125.9		310	0.822281	0.936556	0.590476
1819.16	3069.26	2144.49		311	0.824934	0.939577	0.592381
1820.41	3145.95	2145.8		312	0.827586	0.942598	0.594286
1825.82	3232.72	2146.65		313	0.830239	0.945619	0.59619
1831.83	3240.64	2149.53		314	0.832891	0.94864	0.598095
1849.49	3293.71	2151.04		315	0.835544	0.951662	0.6
1851.97	3313.96	2154.38		316	0.838196	0.954683	0.601905
1888.17	3371.8	2154.74		317	0.840849	0.957704	0.60381
1888.46	3376.87	2157.61		318	0.843501	0.960725	0.605714
1893.61	3378.02	2158.89		319	0.846154	0.963746	0.607619
1899.84	3427.28	2159.81		320	0.848806	0.966767	0.609524
1919.85	3430.18	2170.31		321	0.851459	0.969789	0.611429
1937.21	3430.87	2175.03		322	0.854111	0.97281	0.613333
1944.23	3432.89	2176.26		323	0.856764	0.975831	0.615238
1960.68	3454.9	2177.25		324	0.859416	0.978852	0.617143
1961.83	3524.21	2180.85		325	0.862069	0.981873	0.619048
2005.88	3529.38	2182.52		326	0.864721	0.984894	0.620952
2020.79	3724.14	2184.52		327	0.867374	0.987915	0.622857
2023.74	4005.22	2187.74		328	0.870027	0.990937	0.624762
2029.13	4358.31	2199.11		329	0.872679	0.993958	0.626667
2034.78	4486.27	2199.5		330	0.875332	0.996979	0.628571
2043.49	4585.69	2201.99		331	0.877984	1	0.630476
2049.02		2207.34		332	0.880637		0.632381
2050.29		2211.22		333	0.883289		0.634286
2052.16		2212.29		334	0.885942		0.63619
2054.4		2217.15		335	0.888594		0.638095
2056.02		2219.14		336	0.891247		0.64
2081.46		2221.48		337	0.893899		0.641905
2088.6		2226.12		338	0.896552		0.64381
2108.94		2228.32		339	0.899204		0.645714
2127.14		2233.27		340	0.901857		0.647619
2141.85		2237.82		341	0.904509		0.649524
2142.78		2243.05		342	0.907162		0.651429
2151.76		2243.48		343	0.909814		0.653333
2189.36		2248.24		344	0.912467		0.655238
2194.96		2251.68		345	0.915119		0.657143
2199.25		2254.45		346	0.917772		0.659048
2207.76		2259.51		347	0.920424		0.660952
2208.71		2261.7		348	0.923077		0.662857
2243.28		2267.21		349	0.925729		0.664762
2245.8		2268.53		350	0.928382		0.666667
2256.82		2281.61		351	0.931034		0.668571
2258.86		2283.29		352	0.933687		0.670476
2288.34		2288.64		353	0.93634		0.672381
2288.42		2296.28		354	0.938992		0.674286
2389.87		2305.76		355	0.941645		0.67619
2390.42		2311.03		356	0.944297		0.678095
2431.88		2319.95		357	0.94695		0.68
2438.5		2331.14		358	0.949602		0.681905
2478.39		2333.34		359	0.952255		0.68381
2483.42		2340.54		360	0.954907		0.685714
2525.13		2341.33		361	0.95756		0.687619
2543.26		2343.73		362	0.960212		0.689524
2636.1		2348.29		363	0.962865		0.691429
2711.68		2350.25		364	0.965517		0.693333
2781.32		2351.72		365	0.96817		0.695238
2813.84		2357.58		366	0.970822		0.697143
2822.12		2365.21		367	0.973475		0.699048
2890.23		2367.43		368	0.976127		0.700952
2922.7		2371.11		369	0.97878		0.702857
2969.35		2373.27		370	0.981432		0.704762
3000.93		2379.46		371	0.984085		0.706667
3060.25		2404.86		372	0.986737		0.708571
3076.42		2420.78		373	0.98939		0.710476
3317.08		2440.86		374	0.992042		0.712381
3365.42		2453.36		375	0.994695		0.714286
3385.7		2453.86		376	0.997347		0.71619
4040.93		2457.71		377	1		0.718095
		2460.78		378			0.72
		2461.28		379			0.721905
		2471.41		380			0.72381
		2474.79		381			0.725714
		2477.73		382			0.727619
		2479.34		383			0.729524
		2485.42		384			0.731429
		2493.66		385			0.733333
		2494.24		386			0.735238
		2494.3		387			0.737143
		2495		388			0.739048
		2501.24		389			0.740952
		2501.25		390			0.742857
		2503.02		391			0.744762
		2506.05		392			0.746667
		2507.21		393			0.748571
		2509.35		394			0.750476
		2515.34		395			0.752381
		2519.75		396			0.754286
		2529.33		397			0.75619
		2530.24		398			0.758095
		2535.04		399			0.76
		2535.93		400			0.761905
		2551.7		401			0.76381
		2556.72		402			0.765714
		2560.83		403			0.767619
		2584.59		404			0.769524
		2590.63		405			0.771429
		2592.18		406			0.773333
		2597.27		407			0.775238
		2597.66		408			0.777143
		2602.42		409			0.779048
		2603.74		410			0.780952
		2604.47		411			0.782857
		2609.34		412			0.784762
		2612.83		413			0.786667
		2621.01		414			0.788571
		2622.16		415			0.790476
		2629.7		416			0.792381
		2636.34		417			0.794286
		2638.79		418			0.79619
		2646.65		419			0.798095
		2678.38		420			0.8
		2682.98		421			0.801905
		2688.13		422			0.80381
		2695		423			0.805714
		2699.88		424			0.807619
		2704.76		425			0.809524
		2714.95		426			0.811429
		2720.31		427			0.813333
		2722.57		428			0.815238
		2723.68		429			0.817143
		2726.14		430			0.819048
		2727.49		431			0.820952
		2727.62		432			0.822857
		2728.94		433			0.824762
		2752.35		434			0.826667
		2757.12		435			0.828571
		2760.68		436			0.830476
		2766.5		437			0.832381
		2779.48		438			0.834286
		2785.47		439			0.83619
		2788.15		440			0.838095
		2790.1		441			0.84
		2807.48		442			0.841905
		2823.41		443			0.84381
		2837.89		444			0.845714
		2839.06		445			0.847619
		2840.79		446			0.849524
		2841.15		447			0.851429
		2849.12		448			0.853333
		2856.57		449			0.855238
		2864.35		450			0.857143
		2868.8		451			0.859048
		2869.59		452			0.860952
		2881.36		453			0.862857
		2889.1		454			0.864762
		2903.08		455			0.866667
		2907.05		456			0.868571
		2909.81		457			0.870476
		2911.21		458			0.872381
		2920.94		459			0.874286
		2942.78		460			0.87619
		2944.18		461			0.878095
		2955.82		462			0.88
		2957.12		463			0.881905
		2960.8		464			0.88381
		2968.09		465			0.885714
		2973.31		466			0.887619
		2974.58		467			0.889524
		3001.46		468			0.891429
		3005.64		469			0.893333
		3026.78		470			0.895238
		3039.74		471			0.897143
		3046.89		472			0.899048
		3061.62		473			0.900952
		3068.47		474			0.902857
		3070.98		475			0.904762
		3093.94		476			0.906667
		3102.5		477			0.908571
		3132.56		478			0.910476
		3135.7		479			0.912381
		3137.41		480			0.914286
		3139.69		481			0.91619
		3147.33		482			0.918095
		3147.52		483			0.92
		3169.22		484			0.921905
		3193.77		485			0.92381
		3198.91		486			0.925714
		3205.47		487			0.927619
		3258.28		488			0.929524
		3268.16		489			0.931429
		3294.04		490			0.933333
		3384.7		491			0.935238
		3385.73		492			0.937143
		3424.86		493			0.939048
		3456.44		494			0.940952
		3475.58		495			0.942857
		3501.74		496			0.944762
		3511.93		497			0.946667
		3531.74		498			0.948571
		3537.29		499			0.950476
		3603.23		500			0.952381
		3638.57		501			0.954286
		3646.29		502			0.95619
		3646.97		503			0.958095
		3649.13		504			0.96
		3663.38		505			0.961905
		3697.97		506			0.96381
		3715.47		507			0.965714
		3718.34		508			0.967619
		3750.65		509			0.969524
		3875.2		510			0.971429
		3901.75		511			0.973333
		3943.85		512			0.975238
		4026.78		513			0.977143
		4031.18		514			0.979048
		4100.86		515			0.980952
		4101.14		516			0.982857
		4260.63		517			0.984762
		4279.98		518			0.986667
		4362.94		519			0.988571
		4435.68		520			0.990476
		4453.45		521			0.992381
		4526.63		522			0.994286
		4545.17		523			0.99619
		4924.55		524			0.998095
		5312.27		525			1

## Sheet: Fig 3D
K234Q
20	70	0 Ca				Cum. Prob. 20	Cum. Prob. 70	Cum. Prob. 0 Ca
268.615	218.703	509.106			1	0.002	0.00212314	0.00218341
291.877	235.659	641.189			2	0.004	0.00424628	0.00436681
328.725	240.019	727.819			3	0.006	0.00636943	0.00655022
358.821	259.687	734.733			4	0.008	0.00849257	0.00873362
366.376	261.327	794.45			5	0.01	0.0106157	0.010917
396.159	262.731	809.977			6	0.012	0.0127389	0.0131004
408.259	266.266	812.157			7	0.014	0.014862	0.0152838
435.691	286.658	842.844			8	0.016	0.0169851	0.0174672
440.664	290.752	859.699			9	0.018	0.0191083	0.0196507
443.601	292.535	871.109			10	0.02	0.0212314	0.0218341
450.884	309.367	872.742			11	0.022	0.0233546	0.0240175
459.446	315.976	874.065			12	0.024	0.0254777	0.0262009
466.977	319.923	908.163			13	0.026	0.0276008	0.0283843
469.773	320.378	926.62			14	0.028	0.029724	0.0305677
498.585	321.345	939.273			15	0.03	0.0318471	0.0327511
498.767	322.458	942.389			16	0.032	0.0339703	0.0349345
501.687	326.919	943.848			17	0.034	0.0360934	0.0371179
504.63	335.063	950.873			18	0.036	0.0382166	0.0393013
505.356	355.729	952.455			19	0.038	0.0403397	0.0414847
520.401	357.217	956.256			20	0.04	0.0424628	0.0436681
525.01	359.794	979.06			21	0.042	0.044586	0.0458515
525.093	364.208	983.62			22	0.044	0.0467091	0.0480349
531.246	368.245	1000.62			23	0.046	0.0488323	0.0502183
533.69	368.964	1008.4			24	0.048	0.0509554	0.0524017
537.314	371.34	1009.68			25	0.05	0.0530786	0.0545852
540.137	372.639	1010.78			26	0.052	0.0552017	0.0567686
540.925	374.244	1012.34			27	0.054	0.0573248	0.058952
548.971	374.262	1018.28			28	0.056	0.059448	0.0611354
549.864	376.617	1036.6			29	0.058	0.0615711	0.0633188
552.051	377.842	1040.15			30	0.06	0.0636943	0.0655022
552.94	382.825	1042.88			31	0.062	0.0658174	0.0676856
554.431	384.257	1053.77			32	0.064	0.0679406	0.069869
555.233	385.989	1066.02			33	0.066	0.0700637	0.0720524
555.413	386.578	1076.89			34	0.068	0.0721868	0.0742358
559.309	387.073	1081.71			35	0.07	0.07431	0.0764192
561.623	392.056	1081.85			36	0.072	0.0764331	0.0786026
568.333	393.155	1084.21			37	0.074	0.0785563	0.080786
572.282	397.409	1084.74			38	0.076	0.0806794	0.0829694
572.92	401.367	1085.29			39	0.078	0.0828025	0.0851528
574.788	402.824	1093.05			40	0.08	0.0849257	0.0873362
576.261	403.291	1098.93			41	0.082	0.0870488	0.0895197
577.397	404.891	1109.42			42	0.084	0.089172	0.0917031
580.612	407.58	1113.75			43	0.086	0.0912951	0.0938865
580.902	408.87	1131.88			44	0.088	0.0934183	0.0960699
581.325	412.767	1132.14			45	0.09	0.0955414	0.0982533
590.125	413.001	1134			46	0.092	0.0976645	0.100437
594.849	418.869	1137.18			47	0.094	0.0997877	0.10262
594.957	419.17	1147.03			48	0.096	0.101911	0.104803
596.419	419.871	1153.25			49	0.098	0.104034	0.106987
601.179	424.475	1153.47			50	0.1	0.106157	0.10917
608.007	426.983	1154.4			51	0.102	0.10828	0.111354
610.679	428.921	1156.13			52	0.104	0.110403	0.113537
611.262	429.709	1157.43			53	0.106	0.112527	0.115721
614.207	431.059	1165.68			54	0.108	0.11465	0.117904
614.436	433.023	1170.89			55	0.11	0.116773	0.120087
615.012	433.155	1179.72			56	0.112	0.118896	0.122271
615.282	434.331	1179.95			57	0.114	0.121019	0.124454
619.078	438.985	1183.3			58	0.116	0.123142	0.126638
622.631	439.209	1187.74			59	0.118	0.125265	0.128821
622.677	442.297	1199.06			60	0.12	0.127389	0.131004
629.508	443.311	1203.79			61	0.122	0.129512	0.133188
629.982	443.6	1212.03			62	0.124	0.131635	0.135371
634.023	446.92	1214.66			63	0.126	0.133758	0.137555
634.53	448.982	1219.48			64	0.128	0.135881	0.139738
637.069	449.646	1226.89			65	0.13	0.138004	0.141921
639.326	452.088	1229.43			66	0.132	0.140127	0.144105
641.29	453.135	1234.17			67	0.134	0.142251	0.146288
643.203	454.14	1234.66			68	0.136	0.144374	0.148472
643.999	454.388	1245.74			69	0.138	0.146497	0.150655
645.548	455.182	1249.79			70	0.14	0.14862	0.152838
646.402	455.295	1255.67			71	0.142	0.150743	0.155022
648.322	457.343	1264.89			72	0.144	0.152866	0.157205
651.017	457.764	1265.36			73	0.146	0.154989	0.159389
653.543	461.341	1266.64			74	0.148	0.157113	0.161572
654.674	461.377	1294.68			75	0.15	0.159236	0.163755
656.774	463.502	1294.78			76	0.152	0.161359	0.165939
657.558	466.591	1298.1			77	0.154	0.163482	0.168122
660.771	468.487	1298.2			78	0.156	0.165605	0.170306
660.864	469.107	1299.83			79	0.158	0.167728	0.172489
663.992	470.289	1300.5			80	0.16	0.169851	0.174672
665.42	471.907	1301.43			81	0.162	0.171975	0.176856
665.527	473.455	1309.48			82	0.164	0.174098	0.179039
667.226	473.496	1312.52			83	0.166	0.176221	0.181223
669.16	474.016	1313.79			84	0.168	0.178344	0.183406
669.667	474.745	1334.4			85	0.17	0.180467	0.18559
671.526	475.579	1342.36			86	0.172	0.18259	0.187773
674.225	475.996	1347.06			87	0.174	0.184713	0.189956
676.053	479.227	1348.38			88	0.176	0.186837	0.19214
676.528	483.033	1352.45			89	0.178	0.18896	0.194323
676.898	483.399	1352.87			90	0.18	0.191083	0.196507
677.935	484.116	1355.51			91	0.182	0.193206	0.19869
678.792	484.319	1361.92			92	0.184	0.195329	0.200873
686.323	484.498	1366.75			93	0.186	0.197452	0.203057
690.028	484.922	1372.76			94	0.188	0.199575	0.20524
692.94	487.491	1387.63			95	0.19	0.201699	0.207424
693.114	492.354	1394.66			96	0.192	0.203822	0.209607
693.75	495.866	1396.47			97	0.194	0.205945	0.21179
694.975	495.89	1403.4			98	0.196	0.208068	0.213974
695.644	496.983	1412.14			99	0.198	0.210191	0.216157
698.929	501.652	1412.88			100	0.2	0.212314	0.218341
700.342	502.729	1416.43			101	0.202	0.214437	0.220524
701.281	503.612	1417.13			102	0.204	0.216561	0.222707
705.751	504.773	1426.71			103	0.206	0.218684	0.224891
706.517	505.097	1436.38			104	0.208	0.220807	0.227074
707.911	505.817	1461.96			105	0.21	0.22293	0.229258
710.116	507.097	1463.14			106	0.212	0.225053	0.231441
710.585	507.486	1465.66			107	0.214	0.227176	0.233624
712.807	508.196	1466.39			108	0.216	0.229299	0.235808
713.72	509.855	1471.27			109	0.218	0.231423	0.237991
714.126	510.901	1471.73			110	0.22	0.233546	0.240175
715.566	513.022	1476.85			111	0.222	0.235669	0.242358
716.327	514.119	1478.37			112	0.224	0.237792	0.244541
716.614	519.178	1480.19			113	0.226	0.239915	0.246725
716.842	519.328	1482.01			114	0.228	0.242038	0.248908
717.213	520.939	1499.59			115	0.23	0.244161	0.251092
717.308	526.476	1506.04			116	0.232	0.246285	0.253275
718.14	526.997	1507.48			117	0.234	0.248408	0.255459
720.827	529.686	1508.41			118	0.236	0.250531	0.257642
720.952	531.367	1508.81			119	0.238	0.252654	0.259825
721.707	533.072	1519.26			120	0.24	0.254777	0.262009
723.367	533.282	1519.72			121	0.242	0.2569	0.264192
723.432	534.7	1529.51			122	0.244	0.259023	0.266376
724.738	534.715	1556.83			123	0.246	0.261146	0.268559
725.023	537.036	1563.11			124	0.248	0.26327	0.270742
725.449	537.617	1585.25			125	0.25	0.265393	0.272926
726.818	538.144	1591.33			126	0.252	0.267516	0.275109
727.079	538.927	1605.45			127	0.254	0.269639	0.277293
730.266	539.782	1614.92			128	0.256	0.271762	0.279476
731.552	539.993	1617.34			129	0.258	0.273885	0.281659
733.476	541.262	1634.32			130	0.26	0.276008	0.283843
733.953	543.047	1655.89			131	0.262	0.278132	0.286026
734.52	543.856	1703.06			132	0.264	0.280255	0.28821
735.057	545.807	1712.04			133	0.266	0.282378	0.290393
735.525	546.061	1720.74			134	0.268	0.284501	0.292576
738.767	547.707	1737.74			135	0.27	0.286624	0.29476
739.39	550.295	1743.95			136	0.272	0.288747	0.296943
741.163	550.336	1743.98			137	0.274	0.29087	0.299127
741.409	550.776	1756.65			138	0.276	0.292994	0.30131
743.964	551.319	1761.47			139	0.278	0.295117	0.303493
744.627	551.9	1776.32			140	0.28	0.29724	0.305677
745.321	554.638	1859.31			141	0.282	0.299363	0.30786
747.05	555.987	1877.56			142	0.284	0.301486	0.310044
747.575	557.663	1878.63			143	0.286	0.303609	0.312227
748.176	560.04	1890.57			144	0.288	0.305732	0.31441
749.993	561.931	1890.73			145	0.29	0.307856	0.316594
751.683	564.989	1932.55			146	0.292	0.309979	0.318777
753.968	566.754	1939.38			147	0.294	0.312102	0.320961
754.985	574.459	1939.94			148	0.296	0.314225	0.323144
755.674	576.775	1943.42			149	0.298	0.316348	0.325328
758.695	581.146	1975.87			150	0.3	0.318471	0.327511
759.529	583.085	1982.86			151	0.302	0.320594	0.329694
764.023	589.657	1986.88			152	0.304	0.322718	0.331878
767.353	590.995	1993.2			153	0.306	0.324841	0.334061
767.641	592.028	1995.11			154	0.308	0.326964	0.336245
767.916	592.147	1999.86			155	0.31	0.329087	0.338428
768.578	592.27	2032.59			156	0.312	0.33121	0.340611
771.038	593.065	2041.92			157	0.314	0.333333	0.342795
771.388	593.484	2053.44			158	0.316	0.335456	0.344978
772.346	594.297	2066.77			159	0.318	0.33758	0.347162
772.7	596.564	2073.95			160	0.32	0.339703	0.349345
772.833	599.911	2102.12			161	0.322	0.341826	0.351528
774.266	602.365	2106.08			162	0.324	0.343949	0.353712
774.542	604.675	2127.8			163	0.326	0.346072	0.355895
778.158	605.784	2138.75			164	0.328	0.348195	0.358079
781.084	606.141	2247.57			165	0.33	0.350318	0.360262
782.176	607.812	2272.78			166	0.332	0.352442	0.362445
783.478	609.555	2320.28			167	0.334	0.354565	0.364629
784.685	610.824	2320.68			168	0.336	0.356688	0.366812
784.7	613.143	2324.22			169	0.338	0.358811	0.368996
785.397	614.042	2337.73			170	0.34	0.360934	0.371179
786.922	615.635	2344.28			171	0.342	0.363057	0.373362
787.433	616.265	2358.32			172	0.344	0.36518	0.375546
788.99	617.108	2395.1			173	0.346	0.367304	0.377729
793.055	625.526	2397.57			174	0.348	0.369427	0.379913
793.981	627.931	2405.02			175	0.35	0.37155	0.382096
794.073	631.821	2416.07			176	0.352	0.373673	0.384279
794.107	634.767	2429.9			177	0.354	0.375796	0.386463
794.276	637.42	2440.29			178	0.356	0.377919	0.388646
796.493	643.857	2485.44			179	0.358	0.380042	0.39083
796.695	652.593	2489.67			180	0.36	0.382166	0.393013
798.346	653.48	2549.13			181	0.362	0.384289	0.395197
799.496	655.463	2566.22			182	0.364	0.386412	0.39738
801.491	658.309	2617.11			183	0.366	0.388535	0.399563
803.063	668.941	2676.39			184	0.368	0.390658	0.401747
808.421	670.182	2734.7			185	0.37	0.392781	0.40393
809.374	673.596	2766.72			186	0.372	0.394904	0.406114
810.329	673.775	2774.44			187	0.374	0.397028	0.408297
810.689	674.787	2778.59			188	0.376	0.399151	0.41048
815.251	687.056	2781.62			189	0.378	0.401274	0.412664
816.704	687.811	2786.82			190	0.38	0.403397	0.414847
820.74	690.39	2789.24			191	0.382	0.40552	0.417031
821.498	693.57	2817.48			192	0.384	0.407643	0.419214
824.804	698.671	2829.92			193	0.386	0.409766	0.421397
825.776	718.109	2837.78			194	0.388	0.41189	0.423581
829.386	723.239	2839.77			195	0.39	0.414013	0.425764
829.841	724.564	2843.4			196	0.392	0.416136	0.427948
831.563	724.709	2848.12			197	0.394	0.418259	0.430131
831.685	752.73	2856.26			198	0.396	0.420382	0.432314
833.79	767.012	2861.26			199	0.398	0.422505	0.434498
841.701	779.138	2880.39			200	0.4	0.424628	0.436681
843.878	790.065	2882.86			201	0.402	0.426752	0.438865
846.057	796.585	2888.6			202	0.404	0.428875	0.441048
846.71	804.858	2915.91			203	0.406	0.430998	0.443231
851.687	814.107	2916.83			204	0.408	0.433121	0.445415
853.075	816.176	2917.52			205	0.41	0.435244	0.447598
855.606	818.34	2932.11			206	0.412	0.437367	0.449782
856.695	828.926	2941.46			207	0.414	0.43949	0.451965
857.843	839.591	2983.6			208	0.416	0.441614	0.454148
858.208	844.497	2997.31			209	0.418	0.443737	0.456332
859.21	851.17	3018.72			210	0.42	0.44586	0.458515
860.203	857.123	3027.96			211	0.422	0.447983	0.460699
860.747	875.993	3064.55			212	0.424	0.450106	0.462882
865.941	876.115	3066.53			213	0.426	0.452229	0.465066
866.384	898.638	3080.45			214	0.428	0.454352	0.467249
871.779	900.831	3098.4			215	0.43	0.456476	0.469432
872.119	904.429	3102.43			216	0.432	0.458599	0.471616
875.032	907.684	3130.59			217	0.434	0.460722	0.473799
875.426	907.874	3219.64			218	0.436	0.462845	0.475983
880.546	915.318	3220.06			219	0.438	0.464968	0.478166
881.18	932.989	3226.84			220	0.44	0.467091	0.480349
887.151	937.851	3230.16			221	0.442	0.469214	0.482533
890.046	950.609	3231.57			222	0.444	0.471338	0.484716
893.063	958.475	3231.72			223	0.446	0.473461	0.4869
894.062	968.056	3232.22			224	0.448	0.475584	0.489083
894.297	976.215	3258.98			225	0.45	0.477707	0.491266
896.414	993.628	3270.74			226	0.452	0.47983	0.49345
898.808	999.74	3285.26			227	0.454	0.481953	0.495633
903.332	1025.11	3289.89			228	0.456	0.484076	0.497817
904.517	1103.51	3301.28			229	0.458	0.4862	0.5
920.309	1113.26	3330.97			230	0.46	0.488323	0.502183
922.488	1122.81	3333.61			231	0.462	0.490446	0.504367
927.389	1150.35	3339.21			232	0.464	0.492569	0.50655
928.913	1158.31	3343.24			233	0.466	0.494692	0.508734
929.376	1176.21	3348.84			234	0.468	0.496815	0.510917
931.741	1188.51	3349.55			235	0.47	0.498938	0.5131
933.971	1197.64	3354.35			236	0.472	0.501062	0.515284
934.572	1209.54	3371.45			237	0.474	0.503185	0.517467
935.697	1229.07	3372.53			238	0.476	0.505308	0.519651
939.048	1237.22	3387.8			239	0.478	0.507431	0.521834
940.084	1247.47	3389.41			240	0.48	0.509554	0.524017
947.94	1247.77	3391.3			241	0.482	0.511677	0.526201
949.342	1255.6	3393.26			242	0.484	0.5138	0.528384
956.355	1275.94	3396.03			243	0.486	0.515924	0.530568
958.515	1306.15	3403.96			244	0.488	0.518047	0.532751
959.094	1321.09	3433.7			245	0.49	0.52017	0.534934
960.305	1321.11	3435.24			246	0.492	0.522293	0.537118
960.902	1328.37	3437.48			247	0.494	0.524416	0.539301
967.929	1337.4	3440.32			248	0.496	0.526539	0.541485
971.423	1338.97	3440.85			249	0.498	0.528662	0.543668
973.539	1342.99	3445.09			250	0.5	0.530786	0.545852
993.825	1343.05	3451.3			251	0.502	0.532909	0.548035
998.454	1344.41	3456.36			252	0.504	0.535032	0.550218
999.77	1357.79	3467.76			253	0.506	0.537155	0.552402
1003.36	1366.2	3471.3			254	0.508	0.539278	0.554585
1003.68	1398.3	3481.9			255	0.51	0.541401	0.556769
1006.33	1410.53	3485.59			256	0.512	0.543524	0.558952
1009.67	1415.21	3499.04			257	0.514	0.545648	0.561135
1010.96	1419.98	3539.41			258	0.516	0.547771	0.563319
1017.21	1425.66	3564.96			259	0.518	0.549894	0.565502
1026.9	1445.42	3574.57			260	0.52	0.552017	0.567686
1031.15	1452.42	3588.25			261	0.522	0.55414	0.569869
1036.74	1452.61	3595.34			262	0.524	0.556263	0.572052
1040.25	1456.14	3615.93			263	0.526	0.558386	0.574236
1042.64	1458.53	3628.88			264	0.528	0.56051	0.576419
1049.92	1461.05	3640.31			265	0.53	0.562633	0.578603
1052.01	1461.67	3650.18			266	0.532	0.564756	0.580786
1054.59	1494.92	3662.44			267	0.534	0.566879	0.582969
1058.06	1518.04	3664.14			268	0.536	0.569002	0.585153
1075.42	1530.43	3684.99			269	0.538	0.571125	0.587336
1076.56	1551.44	3703.76			270	0.54	0.573248	0.58952
1077.32	1558.16	3715.39			271	0.542	0.575372	0.591703
1078.39	1584.46	3734.54			272	0.544	0.577495	0.593886
1087.7	1585.2	3742.82			273	0.546	0.579618	0.59607
1109.65	1606.31	3763.47			274	0.548	0.581741	0.598253
1123.62	1613.59	3767.03			275	0.55	0.583864	0.600437
1124.17	1615.08	3773.81			276	0.552	0.585987	0.60262
1132.25	1622.17	3816.58			277	0.554	0.58811	0.604803
1147.49	1656.55	3825.33			278	0.556	0.590234	0.606987
1148.93	1665.8	3833.02			279	0.558	0.592357	0.60917
1155.52	1669.85	3836.14			280	0.56	0.59448	0.611354
1158.03	1669.88	3850.61			281	0.562	0.596603	0.613537
1163.23	1684.47	3857.62			282	0.564	0.598726	0.615721
1164.15	1700.62	3860.28			283	0.566	0.600849	0.617904
1168.82	1716.58	3862.62			284	0.568	0.602972	0.620087
1179.52	1721.47	3885.84			285	0.57	0.605096	0.622271
1190.23	1722.2	3893.66			286	0.572	0.607219	0.624454
1198.79	1751.79	3919.53			287	0.574	0.609342	0.626638
1206.6	1767.38	3924.1			288	0.576	0.611465	0.628821
1226.68	1768.18	3933.31			289	0.578	0.613588	0.631004
1229.4	1769.04	3940.22			290	0.58	0.615711	0.633188
1233.18	1771.16	3941.39			291	0.582	0.617834	0.635371
1235.17	1776.35	3946.09			292	0.584	0.619958	0.637555
1236.47	1787.88	3950.31			293	0.586	0.622081	0.639738
1239.38	1792.6	3960.79			294	0.588	0.624204	0.641921
1246.74	1811.15	3962.64			295	0.59	0.626327	0.644105
1255.82	1823.59	3974.28			296	0.592	0.62845	0.646288
1261.8	1825.87	3977.02			297	0.594	0.630573	0.648472
1263.12	1830	3977.79			298	0.596	0.632696	0.650655
1270.52	1843.32	3980.39			299	0.598	0.63482	0.652838
1276.04	1845.51	4004.2			300	0.6	0.636943	0.655022
1297.02	1848.01	4007.03			301	0.602	0.639066	0.657205
1297.15	1862.65	4013.04			302	0.604	0.641189	0.659389
1313.78	1906.3	4014.59			303	0.606	0.643312	0.661572
1317.2	1908.68	4032.7			304	0.608	0.645435	0.663755
1324.7	1923.85	4038.4			305	0.61	0.647558	0.665939
1334.44	1924.35	4051.25			306	0.612	0.649682	0.668122
1339.63	1925.89	4071.39			307	0.614	0.651805	0.670306
1350.86	1930.36	4074.86			308	0.616	0.653928	0.672489
1355.66	1939.64	4084.89			309	0.618	0.656051	0.674672
1360.71	1948.2	4084.95			310	0.62	0.658174	0.676856
1364.06	1956.1	4087.58			311	0.622	0.660297	0.679039
1369.77	1971.09	4103.05			312	0.624	0.66242	0.681223
1385.04	1997.02	4141.59			313	0.626	0.664544	0.683406
1385.38	1997.93	4144.91			314	0.628	0.666667	0.68559
1395.11	1998.46	4148.02			315	0.63	0.66879	0.687773
1398.55	2002.42	4163.3			316	0.632	0.670913	0.689956
1399.16	2008.16	4166.43			317	0.634	0.673036	0.69214
1404.58	2014.76	4215.53			318	0.636	0.675159	0.694323
1412.66	2020	4253.52			319	0.638	0.677282	0.696507
1433.4	2022.16	4255.84			320	0.64	0.679406	0.69869
1437.63	2023	4258.09			321	0.642	0.681529	0.700873
1468.87	2032.37	4269.64			322	0.644	0.683652	0.703057
1469.64	2048.89	4274.76			323	0.646	0.685775	0.70524
1474.38	2051.22	4283.69			324	0.648	0.687898	0.707424
1474.8	2056.06	4287.51			325	0.65	0.690021	0.709607
1479.12	2057.37	4289.35			326	0.652	0.692144	0.71179
1497.09	2067.47	4292.04			327	0.654	0.694268	0.713974
1497.59	2092.78	4323.7			328	0.656	0.696391	0.716157
1498.96	2116.51	4344.55			329	0.658	0.698514	0.718341
1523.49	2123.98	4353.73			330	0.66	0.700637	0.720524
1526.31	2124.23	4362.7			331	0.662	0.70276	0.722707
1532.89	2134.95	4369.6			332	0.664	0.704883	0.724891
1537.13	2146.46	4370.98			333	0.666	0.707006	0.727074
1538.71	2155.34	4375.45			334	0.668	0.70913	0.729258
1540.08	2174.33	4376.91			335	0.67	0.711253	0.731441
1576.6	2188.23	4395.48			336	0.672	0.713376	0.733624
1604.84	2192.26	4409.04			337	0.674	0.715499	0.735808
1606.14	2193.81	4424.6			338	0.676	0.717622	0.737991
1610.07	2194.93	4425.63			339	0.678	0.719745	0.740175
1611.95	2208.99	4452.23			340	0.68	0.721868	0.742358
1617.49	2232.71	4452.72			341	0.682	0.723992	0.744541
1619.91	2240.27	4462.06			342	0.684	0.726115	0.746725
1628.61	2241.54	4482.33			343	0.686	0.728238	0.748908
1652.55	2249.07	4490.69			344	0.688	0.730361	0.751092
1659.67	2250.26	4492.23			345	0.69	0.732484	0.753275
1679.98	2255.19	4501.29			346	0.692	0.734607	0.755459
1680.87	2274.21	4507.11			347	0.694	0.73673	0.757642
1712.13	2274.86	4511.7			348	0.696	0.738854	0.759825
1712.82	2274.99	4522.34			349	0.698	0.740977	0.762009
1717.33	2285.39	4541.86			350	0.7	0.7431	0.764192
1721.9	2295.53	4551.3			351	0.702	0.745223	0.766376
1732.99	2305.39	4556.79			352	0.704	0.747346	0.768559
1733.34	2313.91	4558.66			353	0.706	0.749469	0.770742
1739.37	2318.79	4562.48			354	0.708	0.751592	0.772926
1743.77	2326.15	4568.36			355	0.71	0.753715	0.775109
1744.56	2340.27	4585.85			356	0.712	0.755839	0.777293
1756.92	2345.8	4596.98			357	0.714	0.757962	0.779476
1760.34	2346.55	4621.45			358	0.716	0.760085	0.781659
1773.61	2368.44	4625.71			359	0.718	0.762208	0.783843
1781.08	2369.53	4626.1			360	0.72	0.764331	0.786026
1785.93	2373.22	4629.31			361	0.722	0.766454	0.78821
1786.23	2376.59	4633.69			362	0.724	0.768577	0.790393
1799.54	2391.83	4644.66			363	0.726	0.770701	0.792576
1806.12	2392.62	4658.85			364	0.728	0.772824	0.79476
1815.98	2393.89	4699.72			365	0.73	0.774947	0.796943
1829.63	2394.54	4720.99			366	0.732	0.77707	0.799127
1839.71	2400.03	4722.15			367	0.734	0.779193	0.80131
1847.28	2400.43	4729.61			368	0.736	0.781316	0.803493
1849.23	2410.67	4742.42			369	0.738	0.783439	0.805677
1870.77	2418.51	4745.6			370	0.74	0.785563	0.80786
1875.79	2425.41	4747.8			371	0.742	0.787686	0.810044
1878.41	2431.43	4750.37			372	0.744	0.789809	0.812227
1879.08	2442.98	4760.63			373	0.746	0.791932	0.81441
1886.28	2448.63	4792.5			374	0.748	0.794055	0.816594
1903.32	2450.86	4825.66			375	0.75	0.796178	0.818777
1907.54	2464.5	4852.44			376	0.752	0.798301	0.820961
1910.29	2468.33	4884.99			377	0.754	0.800425	0.823144
1910.94	2479.21	4893.87			378	0.756	0.802548	0.825328
1912.08	2488.77	4900.86			379	0.758	0.804671	0.827511
1928.11	2494.14	4936.3			380	0.76	0.806794	0.829694
1931.31	2506.35	4951.33			381	0.762	0.808917	0.831878
1945.56	2507.68	4953.9			382	0.764	0.81104	0.834061
1971.12	2509.81	4986.15			383	0.766	0.813163	0.836245
1986.9	2511.76	5021.21			384	0.768	0.815287	0.838428
1998.88	2516.88	5023.56			385	0.77	0.81741	0.840611
2002.88	2539.68	5034.65			386	0.772	0.819533	0.842795
2014.98	2558.15	5064.82			387	0.774	0.821656	0.844978
2016.55	2559.51	5080.64			388	0.776	0.823779	0.847162
2018.91	2582.59	5083.54			389	0.778	0.825902	0.849345
2024.88	2599.67	5099.72			390	0.78	0.828025	0.851528
2047.78	2604.93	5140.97			391	0.782	0.830149	0.853712
2054.65	2611.9	5141.55			392	0.784	0.832272	0.855895
2075.02	2619.16	5151.44			393	0.786	0.834395	0.858079
2089.8	2620.62	5158.18			394	0.788	0.836518	0.860262
2092.65	2640.14	5166.54			395	0.79	0.838641	0.862445
2106.95	2647.58	5169.37			396	0.792	0.840764	0.864629
2113.51	2688.22	5172.03			397	0.794	0.842887	0.866812
2123.53	2688.81	5172.19			398	0.796	0.845011	0.868996
2137.21	2721.81	5176.66			399	0.798	0.847134	0.871179
2144.19	2748.93	5185.37			400	0.8	0.849257	0.873362
2153.99	2754.28	5206.34			401	0.802	0.85138	0.875546
2162.86	2761.87	5217.41			402	0.804	0.853503	0.877729
2165.72	2762.32	5252.98			403	0.806	0.855626	0.879913
2175.3	2802.99	5272.62			404	0.808	0.857749	0.882096
2180.04	2826.69	5290.24			405	0.81	0.859873	0.884279
2189.84	2844.68	5321.68			406	0.812	0.861996	0.886463
2199.11	2845.8	5325.52			407	0.814	0.864119	0.888646
2200.57	2846.39	5338.69			408	0.816	0.866242	0.89083
2204.56	2865.75	5350.05			409	0.818	0.868365	0.893013
2209.7	2955.2	5351.04			410	0.82	0.870488	0.895197
2209.91	2974.14	5397.77			411	0.822	0.872611	0.89738
2213.54	3014.97	5413.24			412	0.824	0.874735	0.899563
2216.26	3020.42	5459.05			413	0.826	0.876858	0.901747
2223.63	3038.64	5573.02			414	0.828	0.878981	0.90393
2240.7	3091.55	5574.49			415	0.83	0.881104	0.906114
2254.1	3129.34	5587.54			416	0.832	0.883227	0.908297
2260.18	3134.05	5589.46			417	0.834	0.88535	0.91048
2269.84	3162.6	5667.26			418	0.836	0.887473	0.912664
2272.04	3165.87	5673.7			419	0.838	0.889597	0.914847
2280.36	3170.66	5676.24			420	0.84	0.89172	0.917031
2306.22	3214.08	5730.02			421	0.842	0.893843	0.919214
2313.51	3214.92	5805.89			422	0.844	0.895966	0.921397
2320.91	3222.91	5809.89			423	0.846	0.898089	0.923581
2333.98	3223.17	5865.17			424	0.848	0.900212	0.925764
2355.19	3281.88	5879.91			425	0.85	0.902335	0.927948
2357.12	3307.14	5916.15			426	0.852	0.904459	0.930131
2375.27	3370.58	5960.53			427	0.854	0.906582	0.932314
2379.11	3387.16	5970.23			428	0.856	0.908705	0.934498
2411.91	3396.36	6056.54			429	0.858	0.910828	0.936681
2415.73	3443.53	6072.23			430	0.86	0.912951	0.938865
2446.83	3467.67	6077.52			431	0.862	0.915074	0.941048
2446.88	3494.09	6121.97			432	0.864	0.917197	0.943231
2451.83	3556.33	6172.39			433	0.866	0.919321	0.945415
2454.9	3558.7	6239.61			434	0.868	0.921444	0.947598
2460.59	3582.56	6351.23			435	0.87	0.923567	0.949782
2464.2	3584.04	6372.81			436	0.872	0.92569	0.951965
2469.23	3607.69	6392.33			437	0.874	0.927813	0.954148
2482.52	3656.9	6398.93			438	0.876	0.929936	0.956332
2486.71	3692.72	6435.79			439	0.878	0.932059	0.958515
2504.28	3722.53	6504.76			440	0.88	0.934183	0.960699
2522.03	3724.93	6520.94			441	0.882	0.936306	0.962882
2525.77	3752.23	6581.11			442	0.884	0.938429	0.965066
2543.61	3767.34	6635.48			443	0.886	0.940552	0.967249
2546.79	3782.72	6691.52			444	0.888	0.942675	0.969432
2550.89	3816.09	6726.33			445	0.89	0.944798	0.971616
2560.37	3834.71	6830.61			446	0.892	0.946921	0.973799
2573.8	3845.83	6923.27			447	0.894	0.949045	0.975983
2575.39	3846.74	7016.99			448	0.896	0.951168	0.978166
2602.97	3855.33	7242.9			449	0.898	0.953291	0.980349
2628.93	3855.34	7410.75			450	0.9	0.955414	0.982533
2634.39	3855.35	7638.79			451	0.902	0.957537	0.984716
2636.51	3884.06	7681.96			452	0.904	0.95966	0.9869
2642.24	3915.57	7749.52			453	0.906	0.961783	0.989083
2663.94	4000.92	7825.61			454	0.908	0.963907	0.991266
2679.01	4107.6	8465.79			455	0.91	0.96603	0.99345
2689.39	4270.99	8661.28			456	0.912	0.968153	0.995633
2752.71	4284.36	8807.75			457	0.914	0.970276	0.997817
2755.89	4311.22	8948.03			458	0.916	0.972399	1
2766.51	4377.88				459	0.918	0.974522
2780.36	4500.81				460	0.92	0.976645
2816.09	4505.6				461	0.922	0.978769
2891.86	4569.8				462	0.924	0.980892
2920.98	4625.56				463	0.926	0.983015
2931.34	4710.95				464	0.928	0.985138
2935.53	4841.75				465	0.93	0.987261
2950.06	5133.6				466	0.932	0.989384
2951.39	5176.37				467	0.934	0.991507
2962.99	5397.38				468	0.936	0.993631
3013.51	5559.11				469	0.938	0.995754
3047.02	5720.63				470	0.94	0.997877
3154.76	6444.72				471	0.942	1
3158.08					472	0.944
3176.59					473	0.946
3201.49					474	0.948
3205.91					475	0.95
3217.68					476	0.952
3218.98					477	0.954
3238.1					478	0.956
3251.59					479	0.958
3280.98					480	0.96
3289.55					481	0.962
3334.64					482	0.964
3364.33					483	0.966
3377.24					484	0.968
3386.38					485	0.97
3455.55					486	0.972
3476.35					487	0.974
3583					488	0.976
3678.2					489	0.978
3707.96					490	0.98
3797.54					491	0.982
3825.82					492	0.984
3857.77					493	0.986
4061.76					494	0.988
4502.58					495	0.99
5918.93					496	0.992
6149.79					497	0.994
6255.59					498	0.996
6282.01					499	0.998
6599.31					500	1

## Sheet: Fig 3F
K105Q 70	K105Q 0 Ca	K109Q 70	K109Q 0 Ca	K144Q 70	K144Q 0 Ca	K234Q 70	K234Q 0 Ca
8.05288	5.93497	7.06589	4.95067	4.34518	6.20245	3.30116	16.8879
3.53222	7.5334	12.2177	19.2954	2.67865	6.46186	10.9301	35.5889
4.97778	6.17102	3.69531	12.1824	4.17486	7.90806	-7.47225	9.55206
4.74723	4.966	12.7118	22.5156	0.145535	2.64868	-0.472205	20.6008
4.49976	6.60501	4.32945	4.03685	6.08908	11.951	-2.32522	5.27433

## Sheet: Figure Supplement 1A
20	70	0 Ca				Cum. Prob. 20	Cum. Prob. 70	Cum. Prob. 0 Ca
311.952	133.687	697.766			1	0.00180505	0.0021322	0.00222717
413.516	364.882	719.309			2	0.00361011	0.00426439	0.00445434
425.994	373.134	774.43			3	0.00541516	0.00639659	0.00668151
464.279	374.919	775.886			4	0.00722022	0.00852878	0.00890869
466.078	402.167	780.676			5	0.00902527	0.010661	0.0111359
500.848	487.755	819.931			6	0.0108303	0.0127932	0.013363
509.649	493.516	858.069			7	0.0126354	0.0149254	0.0155902
510.634	522.713	859.03			8	0.0144404	0.0170576	0.0178174
517.966	559.011	884.687			9	0.0162455	0.0191898	0.0200445
522.575	576.404	900.064			10	0.0180505	0.021322	0.0222717
541.345	583.04	905.356			11	0.0198556	0.0234542	0.0244989
550.95	589.793	909.986			12	0.0216606	0.0255864	0.0267261
565.017	593.998	924.975			13	0.0234657	0.0277186	0.0289532
571.135	617.311	949.73			14	0.0252708	0.0298507	0.0311804
571.694	617.611	955.047			15	0.0270758	0.0319829	0.0334076
573.015	624.113	975.806			16	0.0288809	0.0341151	0.0356347
575.571	624.537	986.304			17	0.0306859	0.0362473	0.0378619
584.348	626.347	1015.26			18	0.032491	0.0383795	0.0400891
584.381	628.871	1032.6			19	0.034296	0.0405117	0.0423163
595.874	632.039	1046.48			20	0.0361011	0.0426439	0.0445434
597.37	634.889	1066.76			21	0.0379061	0.0447761	0.0467706
598.171	642.237	1069.34			22	0.0397112	0.0469083	0.0489978
619.676	645.204	1083.93			23	0.0415162	0.0490405	0.0512249
624.062	654.142	1090.38			24	0.0433213	0.0511727	0.0534521
626.266	657.995	1090.85			25	0.0451264	0.0533049	0.0556793
631.39	660.721	1102.95			26	0.0469314	0.0554371	0.0579065
634.548	660.976	1106.9			27	0.0487365	0.0575693	0.0601336
642.003	662.415	1119.66			28	0.0505415	0.0597015	0.0623608
645.947	663.027	1122.91			29	0.0523466	0.0618337	0.064588
648.918	667.861	1130.76			30	0.0541516	0.0639659	0.0668151
650.073	670.759	1133.27			31	0.0559567	0.0660981	0.0690423
663.333	674.376	1140.4			32	0.0577617	0.0682303	0.0712695
666.363	686.503	1140.6			33	0.0595668	0.0703625	0.0734967
668.572	697.132	1143.85			34	0.0613718	0.0724947	0.0757238
675.608	697.9	1144.39			35	0.0631769	0.0746269	0.077951
679.799	702.66	1145.56			36	0.0649819	0.0767591	0.0801782
683.939	707.216	1157.4			37	0.066787	0.0788913	0.0824053
688.674	709.931	1159.33			38	0.0685921	0.0810235	0.0846325
692.322	711.022	1170.34			39	0.0703971	0.0831557	0.0868597
695.398	711.486	1173.3			40	0.0722022	0.0852878	0.0890869
703.252	713.768	1179.64			41	0.0740072	0.08742	0.091314
704.744	716.426	1193.84			42	0.0758123	0.0895522	0.0935412
706.226	718.594	1200.45			43	0.0776173	0.0916844	0.0957684
709.611	721.197	1201.48			44	0.0794224	0.0938166	0.0979955
713.523	722.698	1204.55			45	0.0812274	0.0959488	0.100223
714.543	729.426	1213.05			46	0.0830325	0.098081	0.10245
715.694	732.309	1230.39			47	0.0848375	0.100213	0.104677
718.671	736.573	1236.84			48	0.0866426	0.102345	0.106904
720.036	737.082	1238.95			49	0.0884477	0.104478	0.109131
728.611	737.618	1240.41			50	0.0902527	0.10661	0.111359
730.815	738.681	1242.1			51	0.0920578	0.108742	0.113586
733.967	739.254	1244.75			52	0.0938628	0.110874	0.115813
736.991	745.879	1246.6			53	0.0956679	0.113006	0.11804
739.665	748.182	1248.39			54	0.0974729	0.115139	0.120267
740.084	749.816	1274.14			55	0.099278	0.117271	0.122494
744.145	755.652	1274.62			56	0.101083	0.119403	0.124722
744.388	756.609	1281.72			57	0.102888	0.121535	0.126949
747.486	757.432	1284.84			58	0.104693	0.123667	0.129176
748.45	760.302	1288.65			59	0.106498	0.1258	0.131403
749.366	761.298	1288.95			60	0.108303	0.127932	0.13363
750.307	764.402	1300.13			61	0.110108	0.130064	0.135857
752.355	771.787	1307.45			62	0.111913	0.132196	0.138085
752.905	777.755	1310.69			63	0.113718	0.134328	0.140312
753.554	778.823	1313.51			64	0.115523	0.136461	0.142539
761.996	779.052	1320.08			65	0.117329	0.138593	0.144766
762.179	779.101	1321.25			66	0.119134	0.140725	0.146993
762.743	782.426	1322.45			67	0.120939	0.142857	0.14922
765.16	782.687	1324.69			68	0.122744	0.144989	0.151448
774.908	783.054	1325.15			69	0.124549	0.147122	0.153675
777.742	786.597	1326.44			70	0.126354	0.149254	0.155902
781.849	788.229	1328.44			71	0.128159	0.151386	0.158129
782.061	788.832	1361.73			72	0.129964	0.153518	0.160356
791.986	789.012	1371.24			73	0.131769	0.15565	0.162584
793.772	789.685	1380.21			74	0.133574	0.157783	0.164811
796.223	799.334	1383.47			75	0.135379	0.159915	0.167038
796.623	802.473	1391.49			76	0.137184	0.162047	0.169265
796.697	807.866	1398.59			77	0.138989	0.164179	0.171492
797.159	808.04	1406.84			78	0.140794	0.166311	0.173719
798.053	808.485	1413.18			79	0.142599	0.168443	0.175947
801.713	809.71	1419.58			80	0.144404	0.170576	0.178174
801.864	811.701	1420.58			81	0.146209	0.172708	0.180401
806.261	815.951	1423.91			82	0.148014	0.17484	0.182628
807.39	823.199	1428.08			83	0.149819	0.176972	0.184855
810.831	824.345	1430.29			84	0.151625	0.179104	0.187082
818.271	826.533	1430.97			85	0.15343	0.181237	0.18931
819.932	827.249	1440.04			86	0.155235	0.183369	0.191537
823.234	830.01	1442.85			87	0.15704	0.185501	0.193764
823.861	830.124	1455.11			88	0.158845	0.187633	0.195991
823.973	830.672	1456.37			89	0.16065	0.189765	0.198218
825.278	831.738	1459.73			90	0.162455	0.191898	0.200445
831.061	832.034	1463.74			91	0.16426	0.19403	0.202673
832.224	834.353	1466.75			92	0.166065	0.196162	0.2049
833.705	835.183	1469.91			93	0.16787	0.198294	0.207127
834.958	839.477	1472.22			94	0.169675	0.200426	0.209354
835.826	845.82	1478.62			95	0.17148	0.202559	0.211581
835.977	852.651	1483.1			96	0.173285	0.204691	0.213808
836.617	856.218	1487			97	0.17509	0.206823	0.216036
838.856	859.297	1490.97			98	0.176895	0.208955	0.218263
842.002	859.901	1496.94			99	0.1787	0.211087	0.22049
842.329	867.837	1497.31			100	0.180505	0.21322	0.222717
844.66	868.907	1500.9			101	0.18231	0.215352	0.224944
845.966	876.451	1503.1			102	0.184116	0.217484	0.227171
847.029	878.809	1509.53			103	0.185921	0.219616	0.229399
852.29	882.603	1516.38			104	0.187726	0.221748	0.231626
856.03	884.978	1523.71			105	0.189531	0.223881	0.233853
856.277	886.964	1524.4			106	0.191336	0.226013	0.23608
858.731	887.546	1526.57			107	0.193141	0.228145	0.238307
859.19	887.952	1526.79			108	0.194946	0.230277	0.240535
859.707	891.167	1526.88			109	0.196751	0.232409	0.242762
864.465	892.196	1529.52			110	0.198556	0.234542	0.244989
865.074	892.203	1540.23			111	0.200361	0.236674	0.247216
865.967	892.262	1543.89			112	0.202166	0.238806	0.249443
867.952	892.765	1547.58			113	0.203971	0.240938	0.25167
868.021	893.145	1563.42			114	0.205776	0.24307	0.253898
869.447	894.341	1565.06			115	0.207581	0.245203	0.256125
873.074	894.896	1565.8			116	0.209386	0.247335	0.258352
875.057	896.65	1569.7			117	0.211191	0.249467	0.260579
875.45	897.379	1570.9			118	0.212996	0.251599	0.262806
877.012	897.59	1572.34			119	0.214801	0.253731	0.265033
877.866	899.614	1573.89			120	0.216606	0.255864	0.267261
877.914	900.888	1578.1			121	0.218412	0.257996	0.269488
878.116	901.132	1580.39			122	0.220217	0.260128	0.271715
878.117	903.755	1605.31			123	0.222022	0.26226	0.273942
878.634	905.116	1612.66			124	0.223827	0.264392	0.276169
880.494	906.049	1614.79			125	0.225632	0.266525	0.278396
883.628	909.132	1617.43			126	0.227437	0.268657	0.280624
884.92	910.508	1618.13			127	0.229242	0.270789	0.282851
885.911	911.879	1623.3			128	0.231047	0.272921	0.285078
885.972	916.172	1624.48			129	0.232852	0.275053	0.287305
890.165	923.651	1629.75			130	0.234657	0.277186	0.289532
892.005	925.075	1640.36			131	0.236462	0.279318	0.291759
893.712	926.199	1640.71			132	0.238267	0.28145	0.293987
893.952	926.508	1640.92			133	0.240072	0.283582	0.296214
894.701	931.613	1644.4			134	0.241877	0.285714	0.298441
894.811	933.944	1645.44			135	0.243682	0.287846	0.300668
896.097	934.592	1645.73			136	0.245487	0.289979	0.302895
896.668	934.86	1651.21			137	0.247292	0.292111	0.305122
897.258	937.153	1655.84			138	0.249097	0.294243	0.30735
897.857	940.518	1657.01			139	0.250903	0.296375	0.309577
898.63	940.74	1657.77			140	0.252708	0.298507	0.311804
898.871	942.148	1670.33			141	0.254513	0.30064	0.314031
900.355	944.616	1678.3			142	0.256318	0.302772	0.316258
900.473	946.012	1680.02			143	0.258123	0.304904	0.318486
901.502	946.497	1680.06			144	0.259928	0.307036	0.320713
903.644	957.088	1696.09			145	0.261733	0.309168	0.32294
905.2	961.9	1704.73			146	0.263538	0.311301	0.325167
905.478	963.209	1707.63			147	0.265343	0.313433	0.327394
907.303	966.075	1715.94			148	0.267148	0.315565	0.329621
913.817	968.61	1717.55			149	0.268953	0.317697	0.331849
913.84	970.494	1719.49			150	0.270758	0.319829	0.334076
914.47	970.589	1722.63			151	0.272563	0.321962	0.336303
916.841	971.33	1727.27			152	0.274368	0.324094	0.33853
920.544	972.741	1727.36			153	0.276173	0.326226	0.340757
921.121	975.157	1729.09			154	0.277978	0.328358	0.342984
922.568	976.168	1734.79			155	0.279783	0.33049	0.345212
924.856	976.7	1738.5			156	0.281588	0.332623	0.347439
927.464	977.635	1739			157	0.283394	0.334755	0.349666
928.021	978.341	1741.07			158	0.285199	0.336887	0.351893
928.343	983.073	1741.69			159	0.287004	0.339019	0.35412
930.298	983.562	1747.07			160	0.288809	0.341151	0.356347
932.086	985.648	1747.25			161	0.290614	0.343284	0.358575
933.845	985.953	1751.28			162	0.292419	0.345416	0.360802
938.498	987.063	1753.47			163	0.294224	0.347548	0.363029
939.191	987.43	1755.13			164	0.296029	0.34968	0.365256
940.683	987.927	1762.55			165	0.297834	0.351812	0.367483
941.391	991.878	1762.72			166	0.299639	0.353945	0.36971
945.776	992.295	1767.33			167	0.301444	0.356077	0.371938
948.574	993.671	1769.16			168	0.303249	0.358209	0.374165
952.736	993.855	1770.07			169	0.305054	0.360341	0.376392
953.341	993.898	1772.44			170	0.306859	0.362473	0.378619
957.591	996.832	1773.92			171	0.308664	0.364606	0.380846
959.485	999.167	1775.62			172	0.310469	0.366738	0.383073
959.901	999.447	1776.49			173	0.312274	0.36887	0.385301
962.165	1000.94	1778.65			174	0.314079	0.371002	0.387528
964.573	1001.23	1779.1			175	0.315884	0.373134	0.389755
965.373	1004.28	1785.78			176	0.31769	0.375267	0.391982
965.659	1004.39	1789.6			177	0.319495	0.377399	0.394209
966.002	1012.96	1793.41			178	0.3213	0.379531	0.396437
968.759	1013.36	1808.99			179	0.323105	0.381663	0.398664
968.955	1015.29	1811.28			180	0.32491	0.383795	0.400891
972.516	1015.32	1816.71			181	0.326715	0.385928	0.403118
975.07	1016.09	1816.92			182	0.32852	0.38806	0.405345
976.103	1018.76	1819.75			183	0.330325	0.390192	0.407572
976.117	1018.86	1821.33			184	0.33213	0.392324	0.4098
980.071	1021.97	1822.69			185	0.333935	0.394456	0.412027
980.695	1022.6	1824.14			186	0.33574	0.396588	0.414254
981.804	1024.15	1825.42			187	0.337545	0.398721	0.416481
985.093	1027.34	1826.16			188	0.33935	0.400853	0.418708
986.316	1028.89	1827.57			189	0.341155	0.402985	0.420935
988.101	1029.42	1828.16			190	0.34296	0.405117	0.423163
988.992	1030.71	1830.38			191	0.344765	0.407249	0.42539
989.485	1030.94	1830.69			192	0.34657	0.409382	0.427617
994.747	1035.32	1832.98			193	0.348375	0.411514	0.429844
996.11	1039.2	1834.55			194	0.350181	0.413646	0.432071
996.441	1040.08	1835.4			195	0.351986	0.415778	0.434298
1003.8	1040.14	1838.79			196	0.353791	0.41791	0.436526
1005.17	1040.41	1847.23			197	0.355596	0.420043	0.438753
1011.44	1040.71	1849.18			198	0.357401	0.422175	0.44098
1015.23	1041.72	1851.17			199	0.359206	0.424307	0.443207
1015.42	1044.04	1863.16			200	0.361011	0.426439	0.445434
1019.25	1044.82	1865.5			201	0.362816	0.428571	0.447661
1022	1047.62	1869.94			202	0.364621	0.430704	0.449889
1022.93	1047.65	1871.48			203	0.366426	0.432836	0.452116
1025.43	1049.26	1873.72			204	0.368231	0.434968	0.454343
1026.19	1050.22	1874.89			205	0.370036	0.4371	0.45657
1029.6	1050.75	1882.13			206	0.371841	0.439232	0.458797
1030.5	1052.25	1887.75			207	0.373646	0.441365	0.461024
1031.56	1053.55	1892.4			208	0.375451	0.443497	0.463252
1032.39	1057.46	1895.56			209	0.377256	0.445629	0.465479
1035.4	1060.95	1897.57			210	0.379061	0.447761	0.467706
1036.21	1061.6	1902.25			211	0.380866	0.449893	0.469933
1036.87	1061.97	1903.54			212	0.382671	0.452026	0.47216
1038.75	1062.71	1906.91			213	0.384477	0.454158	0.474388
1039.24	1065.76	1907.04			214	0.386282	0.45629	0.476615
1040.71	1067.51	1907.24			215	0.388087	0.458422	0.478842
1042.79	1071.36	1909.61			216	0.389892	0.460554	0.481069
1043.04	1072.45	1915.02			217	0.391697	0.462687	0.483296
1044.41	1073.67	1920.07			218	0.393502	0.464819	0.485523
1044.64	1075.77	1920.66			219	0.395307	0.466951	0.487751
1045.13	1078.6	1921.17			220	0.397112	0.469083	0.489978
1047.83	1079.71	1921.51			221	0.398917	0.471215	0.492205
1048.79	1084.47	1922.24			222	0.400722	0.473348	0.494432
1050.57	1084.91	1925.1			223	0.402527	0.47548	0.496659
1051.7	1087.76	1925.55			224	0.404332	0.477612	0.498886
1052.47	1088.57	1925.75			225	0.406137	0.479744	0.501114
1053.19	1090.09	1928.77			226	0.407942	0.481876	0.503341
1053.34	1090.85	1931.17			227	0.409747	0.484009	0.505568
1054.04	1091.78	1936.29			228	0.411552	0.486141	0.507795
1054.52	1091.88	1956.83			229	0.413357	0.488273	0.510022
1055.7	1093.07	1959.84			230	0.415162	0.490405	0.512249
1062.81	1094.24	1960.39			231	0.416968	0.492537	0.514477
1064.09	1095.19	1960.4			232	0.418773	0.49467	0.516704
1066.29	1101.73	1961.39			233	0.420578	0.496802	0.518931
1068.48	1106.25	1980.8			234	0.422383	0.498934	0.521158
1068.57	1110.56	1986.76			235	0.424188	0.501066	0.523385
1069.05	1110.97	1992.77			236	0.425993	0.503198	0.525612
1069.82	1111.2	1992.98			237	0.427798	0.50533	0.52784
1070.87	1111.86	2001.53			238	0.429603	0.507463	0.530067
1073.49	1113.71	2005.77			239	0.431408	0.509595	0.532294
1073.79	1114.93	2008.57			240	0.433213	0.511727	0.534521
1076.33	1115.67	2010.47			241	0.435018	0.513859	0.536748
1077.6	1118.45	2018.89			242	0.436823	0.515991	0.538976
1078.95	1121.19	2021.68			243	0.438628	0.518124	0.541203
1079.51	1121.47	2024.2			244	0.440433	0.520256	0.54343
1080.35	1121.76	2026.39			245	0.442238	0.522388	0.545657
1080.5	1121.79	2030.97			246	0.444043	0.52452	0.547884
1081.27	1121.96	2036.84			247	0.445848	0.526652	0.550111
1082.53	1122.45	2038.85			248	0.447653	0.528785	0.552339
1083.29	1127.1	2046.06			249	0.449458	0.530917	0.554566
1084.05	1127.73	2049.6			250	0.451264	0.533049	0.556793
1086.33	1129.99	2055.72			251	0.453069	0.535181	0.55902
1087.46	1130.61	2061.01			252	0.454874	0.537313	0.561247
1087.5	1131.6	2063.09			253	0.456679	0.539446	0.563474
1087.51	1137.15	2065.41			254	0.458484	0.541578	0.565702
1089.6	1137.73	2069.1			255	0.460289	0.54371	0.567929
1090.04	1139.33	2073.02			256	0.462094	0.545842	0.570156
1090.46	1139.81	2073.97			257	0.463899	0.547974	0.572383
1091.63	1140.79	2074.77			258	0.465704	0.550107	0.57461
1094.84	1141.52	2081.25			259	0.467509	0.552239	0.576837
1096.85	1142.18	2085.52			260	0.469314	0.554371	0.579065
1096.93	1144.96	2087.65			261	0.471119	0.556503	0.581292
1098.04	1145.32	2088.59			262	0.472924	0.558635	0.583519
1098.79	1145.86	2088.85			263	0.474729	0.560768	0.585746
1099.22	1145.93	2093.58			264	0.476534	0.5629	0.587973
1100.03	1145.94	2097.02			265	0.478339	0.565032	0.5902
1100.54	1146.27	2101.37			266	0.480144	0.567164	0.592428
1101.16	1149.28	2112.82			267	0.481949	0.569296	0.594655
1101.39	1149.81	2117.03			268	0.483755	0.571429	0.596882
1102.08	1156.81	2118.91			269	0.48556	0.573561	0.599109
1102.72	1157.73	2119.02			270	0.487365	0.575693	0.601336
1103.36	1159.54	2131.78			271	0.48917	0.577825	0.603563
1104.57	1160.67	2131.81			272	0.490975	0.579957	0.605791
1106.61	1161.6	2132.51			273	0.49278	0.58209	0.608018
1109.61	1161.72	2134.34			274	0.494585	0.584222	0.610245
1110.1	1165.03	2145.29			275	0.49639	0.586354	0.612472
1115.73	1165.48	2146.93			276	0.498195	0.588486	0.614699
1118.52	1169.54	2147.96			277	0.5	0.590618	0.616927
1119.79	1170.24	2151.86			278	0.501805	0.592751	0.619154
1126.12	1170.91	2157.96			279	0.50361	0.594883	0.621381
1127.52	1171.26	2174.66			280	0.505415	0.597015	0.623608
1127.83	1172.07	2174.73			281	0.50722	0.599147	0.625835
1127.98	1172.09	2185.97			282	0.509025	0.601279	0.628062
1131.41	1172.32	2189.51			283	0.51083	0.603412	0.63029
1131.58	1173.89	2195.84			284	0.512635	0.605544	0.632517
1131.76	1178.28	2196.71			285	0.51444	0.607676	0.634744
1133.07	1178.71	2197.53			286	0.516245	0.609808	0.636971
1133.11	1179.68	2212.57			287	0.518051	0.61194	0.639198
1138.49	1181.01	2216.86			288	0.519856	0.614072	0.641425
1140.21	1181.31	2226.86			289	0.521661	0.616205	0.643653
1140.9	1181.63	2230.54			290	0.523466	0.618337	0.64588
1143.09	1186.78	2234.49			291	0.525271	0.620469	0.648107
1143.98	1187.25	2235.26			292	0.527076	0.622601	0.650334
1146.34	1188.46	2237.23			293	0.528881	0.624733	0.652561
1146.71	1189.13	2241.03			294	0.530686	0.626866	0.654788
1147.36	1193.35	2251.04			295	0.532491	0.628998	0.657016
1148.3	1196.5	2259.53			296	0.534296	0.63113	0.659243
1151.23	1200.87	2268.46			297	0.536101	0.633262	0.66147
1152.65	1201.58	2275.47			298	0.537906	0.635394	0.663697
1155.72	1202.52	2278.4			299	0.539711	0.637527	0.665924
1158.49	1210.26	2279.28			300	0.541516	0.639659	0.668151
1160.1	1210.51	2281.16			301	0.543321	0.641791	0.670379
1160.51	1212.19	2298.24			302	0.545126	0.643923	0.672606
1161.23	1212.42	2301.54			303	0.546931	0.646055	0.674833
1163.04	1216.44	2310.2			304	0.548736	0.648188	0.67706
1165.09	1217.69	2313.74			305	0.550542	0.65032	0.679287
1165.42	1217.82	2314.81			306	0.552347	0.652452	0.681514
1165.59	1217.96	2315.28			307	0.554152	0.654584	0.683742
1168.59	1219.44	2318.39			308	0.555957	0.656716	0.685969
1169.16	1224.17	2319.81			309	0.557762	0.658849	0.688196
1172.32	1226.04	2322.6			310	0.559567	0.660981	0.690423
1174.2	1227.03	2325.72			311	0.561372	0.663113	0.69265
1174.63	1229.68	2330.41			312	0.563177	0.665245	0.694878
1177.48	1231.65	2342.81			313	0.564982	0.667377	0.697105
1179.03	1233.3	2348.79			314	0.566787	0.66951	0.699332
1179.97	1236.15	2353.13			315	0.568592	0.671642	0.701559
1181.05	1237.27	2353.96			316	0.570397	0.673774	0.703786
1181.23	1237.28	2358.92			317	0.572202	0.675906	0.706013
1182.13	1238.06	2359.76			318	0.574007	0.678038	0.708241
1182.34	1245.21	2369.02			319	0.575812	0.680171	0.710468
1184.52	1246.29	2370.36			320	0.577617	0.682303	0.712695
1185.37	1249.98	2385.22			321	0.579422	0.684435	0.714922
1187.34	1251.4	2385.54			322	0.581227	0.686567	0.717149
1187.81	1251.41	2388.5			323	0.583032	0.688699	0.719376
1188.46	1252.19	2388.71			324	0.584838	0.690832	0.721604
1189.18	1252.3	2389.97			325	0.586643	0.692964	0.723831
1190.26	1253.64	2397.58			326	0.588448	0.695096	0.726058
1195.85	1255.15	2400.05			327	0.590253	0.697228	0.728285
1197.03	1260.35	2403.01			328	0.592058	0.69936	0.730512
1197.2	1260.48	2409.59			329	0.593863	0.701493	0.732739
1200.61	1262.54	2426.43			330	0.595668	0.703625	0.734967
1200.72	1263.16	2428.65			331	0.597473	0.705757	0.737194
1202.09	1266.5	2429.04			332	0.599278	0.707889	0.739421
1202.2	1268.38	2438.8			333	0.601083	0.710021	0.741648
1202.44	1272.26	2439.4			334	0.602888	0.712154	0.743875
1205.7	1276.59	2444.03			335	0.604693	0.714286	0.746102
1206.7	1277.2	2447.11			336	0.606498	0.716418	0.74833
1211.25	1277.97	2452.09			337	0.608303	0.71855	0.750557
1211.75	1278.3	2457.62			338	0.610108	0.720682	0.752784
1212.96	1285.32	2473.23			339	0.611913	0.722814	0.755011
1213.59	1291.01	2485.89			340	0.613718	0.724947	0.757238
1213.71	1293.66	2507.25			341	0.615523	0.727079	0.759465
1215.99	1296.75	2512.2			342	0.617329	0.729211	0.761693
1220.64	1296.84	2520.3			343	0.619134	0.731343	0.76392
1222.16	1308.15	2525.41			344	0.620939	0.733475	0.766147
1223.06	1308.45	2528.2			345	0.622744	0.735608	0.768374
1223.42	1310.32	2541.38			346	0.624549	0.73774	0.770601
1224.04	1315.19	2545.18			347	0.626354	0.739872	0.772829
1224.46	1320.68	2546.84			348	0.628159	0.742004	0.775056
1226.24	1325.57	2552.03			349	0.629964	0.744136	0.777283
1227.04	1329.55	2570.55			350	0.631769	0.746269	0.77951
1228.35	1332.28	2571.26			351	0.633574	0.748401	0.781737
1228.77	1335.5	2577.91			352	0.635379	0.750533	0.783964
1231.41	1345.11	2579.61			353	0.637184	0.752665	0.786192
1231.87	1348.96	2589.2			354	0.638989	0.754797	0.788419
1233.92	1349.76	2590.28			355	0.640794	0.75693	0.790646
1235.09	1351.37	2610.93			356	0.642599	0.759062	0.792873
1237.28	1352.64	2615.31			357	0.644404	0.761194	0.7951
1239.96	1354.94	2621.42			358	0.646209	0.763326	0.797327
1241.04	1355.98	2621.76			359	0.648014	0.765458	0.799555
1242.3	1363.03	2623.08			360	0.649819	0.767591	0.801782
1243.1	1380.66	2631.05			361	0.651625	0.769723	0.804009
1243.7	1385.99	2636.68			362	0.65343	0.771855	0.806236
1244.05	1386.85	2640.93			363	0.655235	0.773987	0.808463
1246.32	1389.78	2645.61			364	0.65704	0.776119	0.81069
1247	1390.63	2650.46			365	0.658845	0.778252	0.812918
1249.13	1391.89	2653.7			366	0.66065	0.780384	0.815145
1252.43	1397.53	2655.85			367	0.662455	0.782516	0.817372
1253.88	1400.26	2658.14			368	0.66426	0.784648	0.819599
1256.54	1401.89	2660.3			369	0.666065	0.78678	0.821826
1258.78	1405.92	2664.74			370	0.66787	0.788913	0.824053
1262.64	1412.22	2670.56			371	0.669675	0.791045	0.826281
1263.19	1422.31	2677.19			372	0.67148	0.793177	0.828508
1264.69	1430.83	2682.81			373	0.673285	0.795309	0.830735
1267.29	1431.44	2697.92			374	0.67509	0.797441	0.832962
1268.04	1432.15	2701.63			375	0.676895	0.799574	0.835189
1268.56	1433.63	2709.07			376	0.6787	0.801706	0.837416
1271.07	1433.8	2717.21			377	0.680505	0.803838	0.839644
1274	1436.8	2721.11			378	0.68231	0.80597	0.841871
1274.17	1438.86	2730.81			379	0.684116	0.808102	0.844098
1274.35	1440.66	2753.47			380	0.685921	0.810235	0.846325
1274.51	1445.57	2766.72			381	0.687726	0.812367	0.848552
1278.03	1446.63	2767.81			382	0.689531	0.814499	0.85078
1281.46	1448.23	2769.24			383	0.691336	0.816631	0.853007
1281.99	1451.17	2773.86			384	0.693141	0.818763	0.855234
1282.03	1452.54	2776.39			385	0.694946	0.820896	0.857461
1283.99	1462.64	2779.93			386	0.696751	0.823028	0.859688
1284.66	1462.86	2781.79			387	0.698556	0.82516	0.861915
1286.27	1465.37	2782.77			388	0.700361	0.827292	0.864143
1286.4	1467.6	2783.31			389	0.702166	0.829424	0.86637
1286.99	1468.82	2804.49			390	0.703971	0.831557	0.868597
1289.46	1474.67	2811.98			391	0.705776	0.833689	0.870824
1289.68	1475.32	2819.82			392	0.707581	0.835821	0.873051
1292.46	1476.45	2831.67			393	0.709386	0.837953	0.875278
1297.48	1482.16	2857.22			394	0.711191	0.840085	0.877506
1297.76	1483.09	2875.64			395	0.712996	0.842217	0.879733
1299.73	1485.63	2879.97			396	0.714801	0.84435	0.88196
1300.12	1488.8	2893.63			397	0.716606	0.846482	0.884187
1306.29	1496.98	2903.75			398	0.718412	0.848614	0.886414
1307.62	1500.37	2920.26			399	0.720217	0.850746	0.888641
1308.13	1500.98	2926.9			400	0.722022	0.852878	0.890869
1309.15	1503.49	2927.05			401	0.723827	0.855011	0.893096
1312.48	1506.65	2929.75			402	0.725632	0.857143	0.895323
1314.06	1517.76	2933.63			403	0.727437	0.859275	0.89755
1315.1	1524.37	2933.91			404	0.729242	0.861407	0.899777
1315.59	1538.38	2984.97			405	0.731047	0.863539	0.902004
1316.68	1538.59	3004.52			406	0.732852	0.865672	0.904232
1318.29	1539.82	3006.35			407	0.734657	0.867804	0.906459
1322.58	1549.65	3023.33			408	0.736462	0.869936	0.908686
1322.83	1555.2	3042.57			409	0.738267	0.872068	0.910913
1323.31	1555.32	3136.13			410	0.740072	0.8742	0.91314
1327.2	1557.37	3142.38			411	0.741877	0.876333	0.915367
1329.35	1559.97	3143.79			412	0.743682	0.878465	0.917595
1330.64	1564.25	3148.65			413	0.745487	0.880597	0.919822
1332.02	1565.09	3178.88			414	0.747292	0.882729	0.922049
1334.49	1566.19	3191.59			415	0.749097	0.884861	0.924276
1338.82	1570.18	3213.06			416	0.750903	0.886994	0.926503
1342.44	1596	3236.69			417	0.752708	0.889126	0.928731
1343.12	1598.57	3286.98			418	0.754513	0.891258	0.930958
1347.73	1608.26	3296.88			419	0.756318	0.89339	0.933185
1348.11	1616.47	3303.79			420	0.758123	0.895522	0.935412
1351.67	1624.66	3363.62			421	0.759928	0.897655	0.937639
1353.57	1637.8	3404.16			422	0.761733	0.899787	0.939866
1355.11	1640.46	3404.16			423	0.763538	0.901919	0.942094
1359.59	1653.99	3438.64			424	0.765343	0.904051	0.944321
1361.03	1669.92	3484.67			425	0.767148	0.906183	0.946548
1364.09	1684.7	3491.11			426	0.768953	0.908316	0.948775
1365.42	1686.34	3509.08			427	0.770758	0.910448	0.951002
1367.73	1686.51	3528.6			428	0.772563	0.91258	0.953229
1369.3	1692.13	3539.92			429	0.774368	0.914712	0.955457
1370.51	1696.84	3725.89			430	0.776173	0.916844	0.957684
1375.15	1704.88	3745.66			431	0.777978	0.918977	0.959911
1377.74	1710.61	3835.59			432	0.779783	0.921109	0.962138
1377.76	1727.29	3860.67			433	0.781588	0.923241	0.964365
1378.18	1730.33	3864.01			434	0.783394	0.925373	0.966592
1379.14	1731.29	3947.4			435	0.785199	0.927505	0.96882
1382.94	1739.25	4020.75			436	0.787004	0.929638	0.971047
1385.02	1750	4075.58			437	0.788809	0.93177	0.973274
1385.92	1762.73	4129.62			438	0.790614	0.933902	0.975501
1387.79	1764.68	4160.27			439	0.792419	0.936034	0.977728
1388.46	1769.07	4189.16			440	0.794224	0.938166	0.979955
1392.3	1777.68	4253.71			441	0.796029	0.940299	0.982183
1394.37	1814.82	4732.84			442	0.797834	0.942431	0.98441
1394.49	1815.46	4757.66			443	0.799639	0.944563	0.986637
1399.03	1817.62	4814.96			444	0.801444	0.946695	0.988864
1399.92	1855.84	4974.6			445	0.803249	0.948827	0.991091
1404.07	1863.86	5012.81			446	0.805054	0.950959	0.993318
1411.54	1879.85	5425.76			447	0.806859	0.953092	0.995546
1412.94	1905.6	5533.99			448	0.808664	0.955224	0.997773
1413	1924.49	5655.47			449	0.810469	0.957356	1
1413.23	1968.51				450	0.812274	0.959488
1417.46	1996.85				451	0.814079	0.96162
1420.78	2006.31				452	0.815884	0.963753
1423.83	2041.85				453	0.81769	0.965885
1426.58	2094.98				454	0.819495	0.968017
1431.7	2106.63				455	0.8213	0.970149
1435.34	2111.15				456	0.823105	0.972281
1438.74	2113.23				457	0.82491	0.974414
1439.21	2144.97				458	0.826715	0.976546
1439.44	2146.73				459	0.82852	0.978678
1441.09	2151.86				460	0.830325	0.98081
1441.17	2160.55				461	0.83213	0.982942
1441.43	2162.07				462	0.833935	0.985075
1443.89	2183.87				463	0.83574	0.987207
1444.61	2193.55				464	0.837545	0.989339
1453.63	2251.93				465	0.83935	0.991471
1456.71	2282.74				466	0.841155	0.993603
1461.68	2312.95				467	0.84296	0.995736
1465.69	2359.89				468	0.844765	0.997868
1473.14	2844.7				469	0.84657	1
1473.72					470	0.848375
1474.66					471	0.850181
1477.66					472	0.851986
1479.96					473	0.853791
1484.44					474	0.855596
1486.6					475	0.857401
1488.49					476	0.859206
1489.7					477	0.861011
1490.3					478	0.862816
1490.68					479	0.864621
1494.19					480	0.866426
1495.68					481	0.868231
1496.38					482	0.870036
1498.41					483	0.871841
1505.46					484	0.873646
1505.85					485	0.875451
1508.1					486	0.877256
1508.83					487	0.879061
1510.36					488	0.880866
1517.86					489	0.882671
1522.09					490	0.884477
1539.78					491	0.886282
1555.98					492	0.888087
1561.95					493	0.889892
1565.68					494	0.891697
1573.45					495	0.893502
1575.99					496	0.895307
1585.03					497	0.897112
1588.15					498	0.898917
1591.72					499	0.900722
1593.12					500	0.902527
1593.54					501	0.904332
1596.46					502	0.906137
1601.74					503	0.907942
1602.22					504	0.909747
1613.28					505	0.911552
1614.35					506	0.913357
1622.01					507	0.915162
1625.56					508	0.916968
1636.84					509	0.918773
1639.18					510	0.920578
1646.72					511	0.922383
1661.79					512	0.924188
1678.45					513	0.925993
1685.86					514	0.927798
1719.63					515	0.929603
1724.59					516	0.931408
1729.15					517	0.933213
1734.18					518	0.935018
1741.75					519	0.936823
1741.91					520	0.938628
1745.01					521	0.940433
1747					522	0.942238
1754.74					523	0.944043
1757.28					524	0.945848
1763.4					525	0.947653
1766.53					526	0.949458
1801.34					527	0.951264
1804.54					528	0.953069
1806.23					529	0.954874
1812.3					530	0.956679
1830.87					531	0.958484
1841.49					532	0.960289
1857.48					533	0.962094
1861.63					534	0.963899
1864.17					535	0.965704
1869.69					536	0.967509
1876.63					537	0.969314
1879.58					538	0.971119
1894.32					539	0.972924
1969.92					540	0.974729
1999.64					541	0.976534
2011.56					542	0.978339
2013.22					543	0.980144
2050.51					544	0.981949
2092.76					545	0.983755
2105.95					546	0.98556
2142.07					547	0.987365
2177					548	0.98917
2180.87					549	0.990975
2183.16					550	0.99278
2249.94					551	0.994585
2289.52					552	0.99639
2417.5					553	0.998195
2444.07					554	1

## Sheet: Figure Supplement 1B
		Difference from 20
Mutant	Repeat	70	0Ca
WT Cx43	1	286.567	314.266
	2	1156.16	784.233
	3	830.853	834.587
	4	1093.19	857.81
	5	333.629	378.649
K144R	1	-41.2985	687.22
	2	-41.9145	577.169
	3	-114.408	505.36
	4	114.947	905.879
	5	-141.843	1054.56
