# Supplementary material for: CO2-dependent opening of connexin 43 hemichannels
Source: eLife. 2026 Jun 3;14:RP105989. doi: 10.7554/eLife.105989 (PMC13233067; doi:10.7554/eLife.105989)
Supplement: Figure 4—figure supplement 1—source data 1. [file elife-105989-fig4-figsupp1-data1.xlsx]

## Sheet: Sheet1
	Cx43WT	Cx43K105Q	Cx43K109Q	Cx43K144Q
MaxATP (µM)	3.2	4.5	3.2	3.8
K (mmHg)	43	47	30	43
H	10	10	10	4
Ki (mmHg)	75	65	-	75
Hi	6	8	-	6
