# Supplementary material for: CO2-dependent opening of connexin 43 hemichannels
Source: eLife. 2026 Jun 3;14:RP105989. doi: 10.7554/eLife.105989 (PMC13233067; doi:10.7554/eLife.105989)
Supplement: Figure 4—source data 1. [file elife-105989-fig4-data1.xlsx]

## Sheet: Fig 4E
K105Q				K10Q
35	55	70		35	55	70
1.39085	2.86392	1.5341		2.57852	2.78414	3.03819
1.40606	3.4871	2.59808		2.62247	2.91516	2.94594
1.24986	3.90383	3.8152		2.82657	2.82657	2.82657
1.20226	2.54364	2.47027		2.5855	2.5855	2.5855
0.0818311	2.75625	1.57143		2.55399	3.55399	3.55399
1.85854	2.49389	2.22532		3.13982	3.13982	3.13982
1.04838	2.40964	1.86019		2.31262	3.05806	2.39796
1.33674	2.32504	2.90008		2.41634	3.22965	3.57914
0.507385	2.06877	2.50529		2.31992	2.65999	2.48555
0.226464	1.62066	0.522557		4.82313	3.29391	3.88626
-0.0371683	2.53216	1.06996		2.17601	2.87599	3.05929
0.141646	2.93585	2.52332		3.10484	2.91951	2.35521
-0.391935	2.4077	1.19485		2.70047	2.72356	2.9146
-0.388927	2.29514	1.14165		3.61064	3.42105	3.39105
-0.0332109	3.32487	1.28418		3.78215	3.44164	3.25033
-0.0341374	3.23929	1.20506		3.51943	3.29775	3.18576
-0.0573158	3.17565	1.26624		3.413	3.15677	3.12777
-0.0589889	3.31529	0.87685		3.42768	3.15939	3.14358
-0.0632047	3.24169	1.37927		3.48653	3.33254	3.22122
-0.0539796	3.24777	1.2731		3.45705	3.28373	3.23378
-0.0452282	3.05927	1.33655
-0.044606	2.92921	1.39372
-0.058274	3.14054	1.36905

## Sheet: Fig 4F
K144Q				K234Q
35	55	70		55	50mM KCl
1.24256	2.67556	2.26266		0.646059	3.23516
1.25487	3.07085	1.90019		0.353638	2.74533
1.44428	2.11613	1.74297		-0.0733685	2.35743
1.58608	2.2492	1.88082		-0.126382	2.34637
1.55106	2.46497	2.08134		-0.166925	2.74545
1.71472	2.32425	2.01628		-0.081712	2.98567
1.42673	2.16301	1.47048		0.436334	3.23562
1.65497	2.31668	1.80773		-0.105344	3.54231
1.4988	2.26284	1.75076		-0.0783079	2.78957
0.004212	3.00322	1.90003		0.0384924	2.98576
-0.000214	2.66252	2.79939		-0.0285294	3.63422
-0.000575	2.8324	1.45553		-0.0229031	3.53221
				-0.0745634	2.74285
				-0.0637439	2.93253
				-0.051646	3.21363
