# Supplementary material for: CO2-dependent opening of connexin 43 hemichannels
Source: eLife. 2026 Jun 3;14:RP105989. doi: 10.7554/eLife.105989 (PMC13233067; doi:10.7554/eLife.105989)
Supplement: Figure 5—source data 1. [file elife-105989-fig5-data1.xlsx]

## Sheet: Fig 5A
K109Q K144Q
20	70	0 Ca			Cum. Prob. 20	Cum. Prob. 70	Cum. Prob. 0 Ca
136.293	416.964	945.923		1	0.00243309	0.00242131	0.00228311
290.591	607.354	1035.7		2	0.00486618	0.00484262	0.00456621
492.465	613.159	1113.34		3	0.00729927	0.00726392	0.00684932
499.507	644.322	1135.02		4	0.00973236	0.00968523	0.00913242
573.686	649.591	1239.35		5	0.0121655	0.0121065	0.0114155
611.641	662.748	1251.69		6	0.0145985	0.0145278	0.0136986
680.162	668.546	1270.66		7	0.0170316	0.0169492	0.0159817
713.463	671.497	1333.68		8	0.0194647	0.0193705	0.0182648
754.77	689.978	1402.26		9	0.0218978	0.0217918	0.0205479
777.29	692.826	1404.65		10	0.0243309	0.0242131	0.0228311
800.888	734.517	1412.32		11	0.026764	0.0266344	0.0251142
828.749	742.961	1429.79		12	0.0291971	0.0290557	0.0273973
838.601	752.891	1517.92		13	0.0316302	0.031477	0.0296804
844.517	760.602	1557.93		14	0.0340633	0.0338983	0.0319635
852.858	786.573	1592.68		15	0.0364964	0.0363196	0.0342466
859.635	813.267	1672.71		16	0.0389294	0.0387409	0.0365297
884.648	819.463	1682.15		17	0.0413625	0.0411622	0.0388128
896.123	824.158	1770.25		18	0.0437956	0.0435835	0.0410959
909.385	833.356	1797.14		19	0.0462287	0.0460048	0.043379
921.23	859.239	1876.58		20	0.0486618	0.0484262	0.0456621
944.717	860.318	1888.3		21	0.0510949	0.0508475	0.0479452
945.305	883.153	1889.52		22	0.053528	0.0532688	0.0502283
1020.56	886.353	1904.64		23	0.0559611	0.0556901	0.0525114
1032.13	910.616	1905.96		24	0.0583942	0.0581114	0.0547945
1038.68	917.942	1945.06		25	0.0608273	0.0605327	0.0570776
1046.77	925.155	1960.43		26	0.0632603	0.062954	0.0593607
1052.19	930.875	1971.56		27	0.0656934	0.0653753	0.0616438
1057.99	941.967	1978.66		28	0.0681265	0.0677966	0.0639269
1080.46	949.746	1980.52		29	0.0705596	0.0702179	0.06621
1093.69	959.925	2028.76		30	0.0729927	0.0726392	0.0684932
1117.05	963.234	2044.86		31	0.0754258	0.0750605	0.0707763
1119.08	970.513	2058.47		32	0.0778589	0.0774818	0.0730594
1124.93	975.85	2078.63		33	0.080292	0.0799031	0.0753425
1133.16	990.652	2080.41		34	0.0827251	0.0823245	0.0776256
1134.21	1001.56	2099.08		35	0.0851582	0.0847458	0.0799087
1147.42	1004.52	2102.25		36	0.0875912	0.0871671	0.0821918
1154.57	1009.69	2103.03		37	0.0900243	0.0895884	0.0844749
1166.27	1021.12	2122.93		38	0.0924574	0.0920097	0.086758
1185	1028.94	2124.26		39	0.0948905	0.094431	0.0890411
1187.21	1040.38	2129.25		40	0.0973236	0.0968523	0.0913242
1187.89	1051.84	2135.16		41	0.0997567	0.0992736	0.0936073
1191.62	1054.4	2138.68		42	0.10219	0.101695	0.0958904
1192.8	1076.64	2141.13		43	0.104623	0.104116	0.0981735
1198.45	1080.47	2145.07		44	0.107056	0.106538	0.100457
1212.61	1086.35	2153.09		45	0.109489	0.108959	0.10274
1213.04	1095.02	2155.44		46	0.111922	0.11138	0.105023
1215.29	1111.73	2176.12		47	0.114355	0.113801	0.107306
1227.16	1119.41	2182.51		48	0.116788	0.116223	0.109589
1227.69	1122.61	2208.9		49	0.119221	0.118644	0.111872
1238.53	1131.26	2218.14		50	0.121655	0.121065	0.114155
1254.28	1131.37	2220.77		51	0.124088	0.123487	0.116438
1255.45	1139.73	2222.91		52	0.126521	0.125908	0.118721
1261.92	1151.61	2238.57		53	0.128954	0.128329	0.121005
1267.45	1164.27	2244.63		54	0.131387	0.130751	0.123288
1274	1164.48	2252.89		55	0.13382	0.133172	0.125571
1279.31	1164.9	2273.22		56	0.136253	0.135593	0.127854
1283.22	1188.53	2274.54		57	0.138686	0.138015	0.130137
1303.78	1189.5	2275.99		58	0.141119	0.140436	0.13242
1312.24	1197.09	2292.87		59	0.143552	0.142857	0.134703
1338.91	1213.75	2294.95		60	0.145985	0.145278	0.136986
1338.97	1213.85	2295.53		61	0.148418	0.1477	0.139269
1340.57	1225.73	2307.93		62	0.150852	0.150121	0.141553
1358.26	1227.53	2327.57		63	0.153285	0.152542	0.143836
1366.54	1233.54	2327.81		64	0.155718	0.154964	0.146119
1367.57	1236.97	2335.95		65	0.158151	0.157385	0.148402
1372.14	1239.83	2337.4		66	0.160584	0.159806	0.150685
1393.1	1247.6	2338.49		67	0.163017	0.162228	0.152968
1395	1251.67	2343.38		68	0.16545	0.164649	0.155251
1397.11	1254.19	2347.55		69	0.167883	0.16707	0.157534
1398.6	1254.43	2358.64		70	0.170316	0.169492	0.159817
1401.08	1272.56	2362.54		71	0.172749	0.171913	0.1621
1418.11	1283.31	2367.57		72	0.175182	0.174334	0.164384
1420.87	1288.65	2383.25		73	0.177616	0.176755	0.166667
1422.97	1310.7	2386.52		74	0.180049	0.179177	0.16895
1429.2	1317.69	2390.71		75	0.182482	0.181598	0.171233
1434.76	1323.72	2401.5		76	0.184915	0.184019	0.173516
1456.72	1327.18	2415.91		77	0.187348	0.186441	0.175799
1462.6	1331.04	2429.49		78	0.189781	0.188862	0.178082
1493.47	1340.07	2450.26		79	0.192214	0.191283	0.180365
1498.46	1346.72	2453.86		80	0.194647	0.193705	0.182648
1535.74	1365.42	2459.9		81	0.19708	0.196126	0.184932
1545.95	1371.72	2476.97		82	0.199513	0.198547	0.187215
1558.73	1373.04	2498.53		83	0.201946	0.200969	0.189498
1559.12	1376.23	2506.19		84	0.20438	0.20339	0.191781
1561.08	1376.57	2539.68		85	0.206813	0.205811	0.194064
1568.35	1384.51	2547.38		86	0.209246	0.208232	0.196347
1572.67	1387.62	2553.03		87	0.211679	0.210654	0.19863
1573.16	1389.94	2554.64		88	0.214112	0.213075	0.200913
1573.55	1404.08	2581.27		89	0.216545	0.215496	0.203196
1591.42	1436.82	2589.35		90	0.218978	0.217918	0.205479
1597.28	1437.23	2596.73		91	0.221411	0.220339	0.207763
1629.48	1437.88	2597.96		92	0.223844	0.22276	0.210046
1629.93	1458.99	2605.14		93	0.226277	0.225182	0.212329
1630.34	1474.49	2622.09		94	0.22871	0.227603	0.214612
1638.77	1494.76	2631.23		95	0.231144	0.230024	0.216895
1643.93	1500.23	2636.01		96	0.233577	0.232446	0.219178
1646.66	1501.18	2654.72		97	0.23601	0.234867	0.221461
1648.2	1504.52	2657.03		98	0.238443	0.237288	0.223744
1653.03	1507.43	2663.41		99	0.240876	0.239709	0.226027
1671.02	1511.88	2666.55		100	0.243309	0.242131	0.228311
1675.58	1514.43	2673.79		101	0.245742	0.244552	0.230594
1681.37	1526.96	2693.76		102	0.248175	0.246973	0.232877
1690.86	1528.32	2704.82		103	0.250608	0.249395	0.23516
1710.15	1532.74	2719.95		104	0.253041	0.251816	0.237443
1712	1534.48	2728.63		105	0.255474	0.254237	0.239726
1722.94	1544.6	2729.01		106	0.257908	0.256659	0.242009
1751.74	1548	2733.9		107	0.260341	0.25908	0.244292
1752.99	1550.42	2748.97		108	0.262774	0.261501	0.246575
1756.01	1559.36	2755.37		109	0.265207	0.263923	0.248858
1757.4	1575.14	2764.05		110	0.26764	0.266344	0.251142
1769.45	1589.91	2781.36		111	0.270073	0.268765	0.253425
1781.58	1593.37	2784.11		112	0.272506	0.271186	0.255708
1782.57	1593.59	2793.81		113	0.274939	0.273608	0.257991
1793.08	1594.26	2794.23		114	0.277372	0.276029	0.260274
1794.54	1596.7	2809.31		115	0.279805	0.27845	0.262557
1794.59	1599.28	2828.16		116	0.282238	0.280872	0.26484
1799.17	1602.32	2830.83		117	0.284672	0.283293	0.267123
1800.07	1603.92	2835.54		118	0.287105	0.285714	0.269406
1803.45	1609.72	2837.47		119	0.289538	0.288136	0.271689
1807.01	1610.44	2839.21		120	0.291971	0.290557	0.273973
1812.5	1611.11	2846.63		121	0.294404	0.292978	0.276256
1830.38	1630.08	2859.04		122	0.296837	0.2954	0.278539
1833.21	1647.96	2865.93		123	0.29927	0.297821	0.280822
1835.47	1648.03	2868.17		124	0.301703	0.300242	0.283105
1864.82	1649.04	2868.48		125	0.304136	0.302663	0.285388
1872.14	1655.76	2868.67		126	0.306569	0.305085	0.287671
1873.37	1661	2884.52		127	0.309002	0.307506	0.289954
1877.25	1663.19	2888.44		128	0.311436	0.309927	0.292237
1886.31	1675.85	2897.79		129	0.313869	0.312349	0.294521
1886.41	1676.2	2908.32		130	0.316302	0.31477	0.296804
1887.01	1678.54	2916.31		131	0.318735	0.317191	0.299087
1888.39	1680.63	2919.16		132	0.321168	0.319613	0.30137
1892.42	1681.13	2936.94		133	0.323601	0.322034	0.303653
1892.59	1681.36	2939.86		134	0.326034	0.324455	0.305936
1897.7	1682.63	2973.64		135	0.328467	0.326877	0.308219
1904.47	1683.51	2980.13		136	0.3309	0.329298	0.310502
1905.78	1687.36	2998.24		137	0.333333	0.331719	0.312785
1945.45	1689.22	3008.4		138	0.335766	0.33414	0.315068
1947.55	1691.22	3040.73		139	0.3382	0.336562	0.317352
1951.01	1694.31	3043.17		140	0.340633	0.338983	0.319635
1955.21	1695.9	3053.18		141	0.343066	0.341404	0.321918
1982.34	1710.8	3059.95		142	0.345499	0.343826	0.324201
1982.8	1725.87	3064.25		143	0.347932	0.346247	0.326484
1989.92	1728.63	3079.21		144	0.350365	0.348668	0.328767
1994.93	1733.11	3084.72		145	0.352798	0.35109	0.33105
2003.11	1735.01	3086.46		146	0.355231	0.353511	0.333333
2006.57	1739.21	3086.78		147	0.357664	0.355932	0.335616
2006.61	1744.7	3095.71		148	0.360097	0.358354	0.3379
2007.75	1750.29	3096.38		149	0.36253	0.360775	0.340183
2015.83	1755.57	3105.2		150	0.364964	0.363196	0.342466
2019.53	1757.07	3110.11		151	0.367397	0.365617	0.344749
2026.81	1761.2	3118.49		152	0.36983	0.368039	0.347032
2039.76	1776.14	3120.28		153	0.372263	0.37046	0.349315
2045.05	1799.78	3128.24		154	0.374696	0.372881	0.351598
2048.74	1811.4	3139.73		155	0.377129	0.375303	0.353881
2051.97	1812.84	3148.98		156	0.379562	0.377724	0.356164
2052.99	1831.33	3165.72		157	0.381995	0.380145	0.358447
2054.05	1831.73	3169.61		158	0.384428	0.382567	0.360731
2058.57	1835.22	3191.24		159	0.386861	0.384988	0.363014
2069.99	1839.99	3206.47		160	0.389294	0.387409	0.365297
2075.76	1842.09	3218.39		161	0.391727	0.389831	0.36758
2076.97	1864.37	3222		162	0.394161	0.392252	0.369863
2088.92	1887.59	3235.44		163	0.396594	0.394673	0.372146
2090.58	1890.14	3237.32		164	0.399027	0.397094	0.374429
2100.05	1890.34	3244.17		165	0.40146	0.399516	0.376712
2125.86	1897.84	3247.18		166	0.403893	0.401937	0.378995
2138.75	1899.8	3249.72		167	0.406326	0.404358	0.381279
2163.66	1901.88	3249.84		168	0.408759	0.40678	0.383562
2164.43	1905.23	3250.22		169	0.411192	0.409201	0.385845
2165.98	1912.54	3256.19		170	0.413625	0.411622	0.388128
2169.64	1926.47	3261.54		171	0.416058	0.414044	0.390411
2179.06	1927.16	3279.54		172	0.418491	0.416465	0.392694
2180.95	1930.86	3283.65		173	0.420925	0.418886	0.394977
2188.43	1938.48	3296.8		174	0.423358	0.421308	0.39726
2190.78	1940.84	3305.74		175	0.425791	0.423729	0.399543
2193.35	1945.56	3317.03		176	0.428224	0.42615	0.401826
2193.75	1946.13	3318.84		177	0.430657	0.428571	0.40411
2204.33	1951.98	3327.59		178	0.43309	0.430993	0.406393
2207.25	1952.46	3350.61		179	0.435523	0.433414	0.408676
2207.46	1967.58	3358.31		180	0.437956	0.435835	0.410959
2214.76	1970.36	3369.8		181	0.440389	0.438257	0.413242
2229.25	1973.91	3374.88		182	0.442822	0.440678	0.415525
2240.19	1976.05	3376.18		183	0.445255	0.443099	0.417808
2246.51	2002.3	3377.3		184	0.447689	0.445521	0.420091
2273.25	2020.21	3385.73		185	0.450122	0.447942	0.422374
2281.13	2020.66	3391.5		186	0.452555	0.450363	0.424658
2285.71	2031.52	3405.21		187	0.454988	0.452785	0.426941
2285.98	2044.26	3407.35		188	0.457421	0.455206	0.429224
2294.01	2046.18	3421.16		189	0.459854	0.457627	0.431507
2306.68	2048.62	3429.07		190	0.462287	0.460048	0.43379
2308.31	2056.08	3432.92		191	0.46472	0.46247	0.436073
2309.59	2083.57	3436.24		192	0.467153	0.464891	0.438356
2321.98	2087.24	3436.41		193	0.469586	0.467312	0.440639
2324.36	2091.37	3438.57		194	0.472019	0.469734	0.442922
2325.47	2100.53	3444.47		195	0.474453	0.472155	0.445205
2326.86	2101.94	3487.54		196	0.476886	0.474576	0.447489
2338.52	2105.82	3494.77		197	0.479319	0.476998	0.449772
2339.75	2131.86	3499.03		198	0.481752	0.479419	0.452055
2343.17	2135.07	3503.74		199	0.484185	0.48184	0.454338
2349.98	2142.5	3513.62		200	0.486618	0.484262	0.456621
2355.39	2143.62	3518.52		201	0.489051	0.486683	0.458904
2357.27	2156.82	3521.26		202	0.491484	0.489104	0.461187
2381.22	2160.26	3539.78		203	0.493917	0.491525	0.46347
2388.27	2162.66	3540.72		204	0.49635	0.493947	0.465753
2392.04	2163.76	3552.24		205	0.498783	0.496368	0.468037
2392.98	2177.66	3564.84		206	0.501217	0.498789	0.47032
2397.57	2179.02	3573.38		207	0.50365	0.501211	0.472603
2408.13	2194.21	3605.05		208	0.506083	0.503632	0.474886
2409.17	2196.47	3609.2		209	0.508516	0.506053	0.477169
2418.04	2210.42	3616.99		210	0.510949	0.508475	0.479452
2434.96	2223.3	3620.69		211	0.513382	0.510896	0.481735
2435.63	2240	3624.12		212	0.515815	0.513317	0.484018
2438.7	2243.01	3641.36		213	0.518248	0.515738	0.486301
2439.9	2244.43	3642.44		214	0.520681	0.51816	0.488584
2445.62	2275.61	3655.6		215	0.523114	0.520581	0.490868
2446.71	2279.52	3656.32		216	0.525547	0.523002	0.493151
2448.94	2285.65	3658.58		217	0.527981	0.525424	0.495434
2452.83	2292.36	3670.31		218	0.530414	0.527845	0.497717
2461.26	2293.39	3706.62		219	0.532847	0.530266	0.5
2462.8	2301.59	3723.32		220	0.53528	0.532688	0.502283
2464.41	2303.95	3740.03		221	0.537713	0.535109	0.504566
2470.33	2328.36	3742.25		222	0.540146	0.53753	0.506849
2474.56	2333.63	3744.99		223	0.542579	0.539952	0.509132
2479.84	2336.12	3749.38		224	0.545012	0.542373	0.511416
2482.78	2336.97	3759.4		225	0.547445	0.544794	0.513699
2484.41	2345.39	3780.16		226	0.549878	0.547215	0.515982
2492.13	2383.94	3783.47		227	0.552311	0.549637	0.518265
2496.81	2402.03	3788.6		228	0.554745	0.552058	0.520548
2497.31	2408.64	3794		229	0.557178	0.554479	0.522831
2503.34	2409.16	3806.1		230	0.559611	0.556901	0.525114
2504.98	2412.33	3825.9		231	0.562044	0.559322	0.527397
2509.95	2422.49	3835.44		232	0.564477	0.561743	0.52968
2518.57	2426	3836.45		233	0.56691	0.564165	0.531963
2522.41	2444.27	3846.64		234	0.569343	0.566586	0.534247
2524.43	2446.03	3855.79		235	0.571776	0.569007	0.53653
2542.3	2474.43	3873.68		236	0.574209	0.571429	0.538813
2551.75	2481.87	3876.14		237	0.576642	0.57385	0.541096
2570.6	2490.27	3876.42		238	0.579075	0.576271	0.543379
2571.75	2493.23	3920		239	0.581509	0.578692	0.545662
2589.36	2503.62	3932.38		240	0.583942	0.581114	0.547945
2589.36	2515.93	3933.99		241	0.586375	0.583535	0.550228
2590.4	2547.74	3935.66		242	0.588808	0.585956	0.552511
2600.99	2558.95	3939.67		243	0.591241	0.588378	0.554795
2605.48	2576.08	3959.9		244	0.593674	0.590799	0.557078
2623.03	2576.43	4000.89		245	0.596107	0.59322	0.559361
2628.9	2576.43	4013.56		246	0.59854	0.595642	0.561644
2630.25	2590.02	4014.33		247	0.600973	0.598063	0.563927
2650.06	2602.14	4041.7		248	0.603406	0.600484	0.56621
2654.87	2622.31	4047.42		249	0.605839	0.602906	0.568493
2657.22	2648.07	4051.56		250	0.608273	0.605327	0.570776
2659.91	2662.88	4052.99		251	0.610706	0.607748	0.573059
2662.29	2666.25	4067.03		252	0.613139	0.610169	0.575342
2662.83	2674.58	4082.83		253	0.615572	0.612591	0.577626
2662.87	2710.32	4092.06		254	0.618005	0.615012	0.579909
2673.39	2732.34	4092.63		255	0.620438	0.617433	0.582192
2686.51	2772.49	4128.31		256	0.622871	0.619855	0.584475
2699.14	2774.72	4129.83		257	0.625304	0.622276	0.586758
2701.67	2778.03	4132.69		258	0.627737	0.624697	0.589041
2716.88	2780.67	4169.23		259	0.63017	0.627119	0.591324
2719.05	2789.85	4188.23		260	0.632603	0.62954	0.593607
2726.4	2819.09	4191.87		261	0.635036	0.631961	0.59589
2726.59	2844.48	4204.83		262	0.63747	0.634383	0.598174
2735.87	2845.84	4216.92		263	0.639903	0.636804	0.600457
2744.05	2878.04	4219.65		264	0.642336	0.639225	0.60274
2746.01	2878.62	4226.2		265	0.644769	0.641646	0.605023
2749.7	2880.44	4245.4		266	0.647202	0.644068	0.607306
2761.04	2890.87	4249.86		267	0.649635	0.646489	0.609589
2766.53	2900.89	4265.93		268	0.652068	0.64891	0.611872
2773.02	2974.64	4273.34		269	0.654501	0.651332	0.614155
2775.74	2982.89	4277.32		270	0.656934	0.653753	0.616438
2775.82	3008.23	4277.54		271	0.659367	0.656174	0.618721
2776.92	3014.45	4285.64		272	0.6618	0.658596	0.621005
2784.41	3040.19	4300.09		273	0.664234	0.661017	0.623288
2785.23	3049.16	4318.64		274	0.666667	0.663438	0.625571
2792.89	3054.06	4331.15		275	0.6691	0.66586	0.627854
2794.17	3181.71	4331.79		276	0.671533	0.668281	0.630137
2797.04	3232.84	4353.87		277	0.673966	0.670702	0.63242
2803.25	3250.02	4372.86		278	0.676399	0.673123	0.634703
2806.18	3254.17	4374.75		279	0.678832	0.675545	0.636986
2811.41	3256.55	4406.81		280	0.681265	0.677966	0.639269
2812.19	3267.89	4410.32		281	0.683698	0.680387	0.641553
2812.85	3268.95	4411.84		282	0.686131	0.682809	0.643836
2819.3	3286.74	4435.12		283	0.688564	0.68523	0.646119
2822.94	3289.34	4444.75		284	0.690998	0.687651	0.648402
2833.9	3293.59	4451.38		285	0.693431	0.690073	0.650685
2849.41	3307.65	4462.82		286	0.695864	0.692494	0.652968
2855.45	3318.57	4464.15		287	0.698297	0.694915	0.655251
2859.3	3320.21	4484.28		288	0.70073	0.697337	0.657534
2859.99	3323.12	4486.57		289	0.703163	0.699758	0.659817
2866.36	3324.48	4510.89		290	0.705596	0.702179	0.6621
2870.14	3329.31	4522.44		291	0.708029	0.7046	0.664384
2880.12	3334.47	4525.86		292	0.710462	0.707022	0.666667
2900.85	3340.69	4531.65		293	0.712895	0.709443	0.66895
2904.31	3340.88	4560.56		294	0.715328	0.711864	0.671233
2911.36	3347.84	4587.94		295	0.717762	0.714286	0.673516
2914.24	3357.24	4606.94		296	0.720195	0.716707	0.675799
2942.84	3383.29	4608.6		297	0.722628	0.719128	0.678082
2947.78	3409.95	4618.8		298	0.725061	0.72155	0.680365
2948.32	3412.17	4637.6		299	0.727494	0.723971	0.682648
2949.18	3434.11	4652.99		300	0.729927	0.726392	0.684932
2956.74	3435.55	4666.63		301	0.73236	0.728814	0.687215
2964.52	3453.85	4668.18		302	0.734793	0.731235	0.689498
2976.97	3454.65	4670.03		303	0.737226	0.733656	0.691781
2980.24	3481.04	4675.96		304	0.739659	0.736077	0.694064
2987.57	3483.45	4680.44		305	0.742092	0.738499	0.696347
2994.51	3494.32	4701.19		306	0.744526	0.74092	0.69863
3007.55	3496.35	4706.71		307	0.746959	0.743341	0.700913
3008.27	3506.34	4708.85		308	0.749392	0.745763	0.703196
3011.72	3514.49	4711.61		309	0.751825	0.748184	0.705479
3015.89	3514.58	4713.1		310	0.754258	0.750605	0.707763
3016.51	3517.45	4713.37		311	0.756691	0.753027	0.710046
3017.24	3524.39	4719.44		312	0.759124	0.755448	0.712329
3022.06	3526.17	4737.9		313	0.761557	0.757869	0.714612
3036.76	3584.4	4756.37		314	0.76399	0.760291	0.716895
3042.99	3597.9	4777.3		315	0.766423	0.762712	0.719178
3044.3	3603.64	4783.49		316	0.768856	0.765133	0.721461
3046.4	3609.03	4800.27		317	0.77129	0.767554	0.723744
3073.6	3611	4801.52		318	0.773723	0.769976	0.726027
3082.95	3613.3	4813.38		319	0.776156	0.772397	0.728311
3083.65	3627.97	4832.81		320	0.778589	0.774818	0.730594
3086.46	3641.82	4843.79		321	0.781022	0.77724	0.732877
3091.66	3673.53	4883.26		322	0.783455	0.779661	0.73516
3092.41	3690.97	4885.98		323	0.785888	0.782082	0.737443
3095.42	3697.18	4906.26		324	0.788321	0.784504	0.739726
3100.78	3727.81	4911.36		325	0.790754	0.786925	0.742009
3107.39	3735.97	4914.82		326	0.793187	0.789346	0.744292
3116.13	3772.98	4938.83		327	0.79562	0.791768	0.746575
3120.02	3795.67	4952.13		328	0.798054	0.794189	0.748858
3122.45	3807.1	4953.62		329	0.800487	0.79661	0.751142
3135.81	3813.56	4969.75		330	0.80292	0.799031	0.753425
3144.48	3826.8	5026.83		331	0.805353	0.801453	0.755708
3146.41	3834.98	5029.67		332	0.807786	0.803874	0.757991
3153.18	3835.99	5030.96		333	0.810219	0.806295	0.760274
3158.26	3841.76	5041.75		334	0.812652	0.808717	0.762557
3158.28	3845.07	5050.54		335	0.815085	0.811138	0.76484
3171.34	3847.76	5056.34		336	0.817518	0.813559	0.767123
3181.44	3854.08	5060.09		337	0.819951	0.815981	0.769406
3186.22	3879.93	5065.4		338	0.822384	0.818402	0.771689
3213.71	3883.29	5067.85		339	0.824818	0.820823	0.773973
3232.57	3920.57	5074.75		340	0.827251	0.823245	0.776256
3234.65	3921.33	5083.17		341	0.829684	0.825666	0.778539
3245.48	3924.22	5103.18		342	0.832117	0.828087	0.780822
3249.41	3950.22	5111.02		343	0.83455	0.830508	0.783105
3266.66	3985.99	5118.9		344	0.836983	0.83293	0.785388
3305.26	3986.52	5174.16		345	0.839416	0.835351	0.787671
3308.22	4018.37	5191.14		346	0.841849	0.837772	0.789954
3311.52	4050.35	5206.73		347	0.844282	0.840194	0.792237
3320.1	4054.86	5224.28		348	0.846715	0.842615	0.794521
3329	4082.44	5224.58		349	0.849148	0.845036	0.796804
3354.35	4090.25	5251.21		350	0.851582	0.847458	0.799087
3359.69	4096.47	5262.73		351	0.854015	0.849879	0.80137
3360.21	4104.69	5265.6		352	0.856448	0.8523	0.803653
3370.21	4127.05	5297.64		353	0.858881	0.854722	0.805936
3381.67	4134.23	5310.95		354	0.861314	0.857143	0.808219
3384.09	4145.02	5316.15		355	0.863747	0.859564	0.810502
3385.66	4146.5	5337.91		356	0.86618	0.861985	0.812785
3406.05	4191.29	5359.13		357	0.868613	0.864407	0.815068
3437.7	4193.22	5362.15		358	0.871046	0.866828	0.817352
3448.16	4216.48	5382.12		359	0.873479	0.869249	0.819635
3451.55	4231.11	5383.8		360	0.875912	0.871671	0.821918
3453.19	4235.91	5387.97		361	0.878345	0.874092	0.824201
3456.45	4262.28	5400.15		362	0.880779	0.876513	0.826484
3467.48	4393.07	5405.53		363	0.883212	0.878935	0.828767
3468.57	4418.59	5416.41		364	0.885645	0.881356	0.83105
3468.74	4508.57	5427.12		365	0.888078	0.883777	0.833333
3487.22	4522.37	5430.04		366	0.890511	0.886199	0.835616
3490.1	4532.9	5443.12		367	0.892944	0.88862	0.8379
3494.97	4536.23	5476.47		368	0.895377	0.891041	0.840183
3496.06	4558.16	5486.63		369	0.89781	0.893462	0.842466
3499.38	4590.41	5509.45		370	0.900243	0.895884	0.844749
3514.5	4606.06	5520.85		371	0.902676	0.898305	0.847032
3539.65	4612.72	5526.48		372	0.905109	0.900726	0.849315
3584.18	4631	5532.68		373	0.907543	0.903148	0.851598
3598.38	4648.55	5550.76		374	0.909976	0.905569	0.853881
3605.06	4695.61	5571.27		375	0.912409	0.90799	0.856164
3622.25	4753.13	5595.54		376	0.914842	0.910412	0.858447
3622.26	4790.22	5603.01		377	0.917275	0.912833	0.860731
3647.61	4800.51	5625.73		378	0.919708	0.915254	0.863014
3654.41	4813.04	5629.39		379	0.922141	0.917676	0.865297
3661.03	4856.39	5644.71		380	0.924574	0.920097	0.86758
3710.59	4886.32	5652.02		381	0.927007	0.922518	0.869863
3714.46	4893.13	5664.75		382	0.92944	0.924939	0.872146
3719.57	4893.58	5665.04		383	0.931873	0.927361	0.874429
3725.22	4999.88	5683.61		384	0.934307	0.929782	0.876712
3848.23	5002.27	5707.69		385	0.93674	0.932203	0.878995
3851.54	5077.09	5710.72		386	0.939173	0.934625	0.881279
3857.68	5100.82	5718.64		387	0.941606	0.937046	0.883562
3860.8	5122.58	5724.77		388	0.944039	0.939467	0.885845
3901.53	5160.44	5733.13		389	0.946472	0.941889	0.888128
3966.05	5198.65	5756.85		390	0.948905	0.94431	0.890411
4026.62	5252.43	5756.94		391	0.951338	0.946731	0.892694
4056.32	5309.15	5761.06		392	0.953771	0.949153	0.894977
4078.63	5335.27	5767.77		393	0.956204	0.951574	0.89726
4129.84	5383.65	5768.97		394	0.958637	0.953995	0.899543
4136.4	5397.34	5773.62		395	0.961071	0.956416	0.901826
4231.48	5593.33	5776.61		396	0.963504	0.958838	0.90411
4243.42	5626.54	5782.76		397	0.965937	0.961259	0.906393
4250.81	5638.72	5848.68		398	0.96837	0.96368	0.908676
4311.98	5670.34	5897.13		399	0.970803	0.966102	0.910959
4425.44	5697.29	5901.9		400	0.973236	0.968523	0.913242
4425.59	5754.57	5922.64		401	0.975669	0.970944	0.915525
4436.13	5823.84	5928.41		402	0.978102	0.973366	0.917808
4518.26	5847.25	5940.78		403	0.980535	0.975787	0.920091
4536.62	5865.47	5943.33		404	0.982968	0.978208	0.922374
4548.08	6116.8	5978.41		405	0.985401	0.98063	0.924658
4640.82	6231.69	5985.51		406	0.987835	0.983051	0.926941
4661.98	6310.93	5987.23		407	0.990268	0.985472	0.929224
4739.68	6414.83	6000.76		408	0.992701	0.987893	0.931507
4834.31	6474.73	6058.76		409	0.995134	0.990315	0.93379
5070.95	6541.99	6122.17		410	0.997567	0.992736	0.936073
5352.71	6852.85	6167.6		411	1	0.995157	0.938356
	8596.68	6198.12		412		0.997579	0.940639
	10132.8	6234.16		413		1	0.942922
		6263.12		414			0.945205
		6265.37		415			0.947489
		6313.52		416			0.949772
		6376.74		417			0.952055
		6396.86		418			0.954338
		6469.68		419			0.956621
		6514.11		420			0.958904
		6527.82		421			0.961187
		6534		422			0.96347
		6555.26		423			0.965753
		6596.66		424			0.968037
		6608.97		425			0.97032
		6614.03		426			0.972603
		6642.2		427			0.974886
		6663.45		428			0.977169
		6817.44		429			0.979452
		7020.2		430			0.981735
		7073.86		431			0.984018
		7322.73		432			0.986301
		7388.2		433			0.988584
		7449.29		434			0.990868
		7505.7		435			0.993151
		7505.79		436			0.995434
		9036.69		437			0.997717
		9882.26		438			1

## Sheet: Fig 5B
K105Q K144Q
20	70	0 Ca			Cum. Prob. 20	Cum. Prob. 70	Cum. Prob. 0 Ca
175.812	105.91	523.384		1	0.00217391	0.0019802	0.00192308
195.637	228.058	781.914		2	0.00434783	0.0039604	0.00384615
265.356	296.769	800.953		3	0.00652174	0.00594059	0.00576923
344.087	357.62	801.033		4	0.00869565	0.00792079	0.00769231
365.242	380.244	808.164		5	0.0108696	0.00990099	0.00961538
375.508	393.2	812.188		6	0.0130435	0.0118812	0.0115385
405.546	393.511	873.908		7	0.0152174	0.0138614	0.0134615
433.993	396.786	896.007		8	0.0173913	0.0158416	0.0153846
449.426	397.866	900.374		9	0.0195652	0.0178218	0.0173077
453.213	400.022	908.065		10	0.0217391	0.019802	0.0192308
473.014	412.391	940.511		11	0.023913	0.0217822	0.0211538
481.141	413.79	969.103		12	0.026087	0.0237624	0.0230769
484.215	429.093	971.819		13	0.0282609	0.0257426	0.025
525.563	430.493	978.496		14	0.0304348	0.0277228	0.0269231
536.845	454.692	983.366		15	0.0326087	0.029703	0.0288462
543.068	455.531	996.829		16	0.0347826	0.0316832	0.0307692
545.163	457.713	1000.24		17	0.0369565	0.0336634	0.0326923
559.925	457.995	1021.7		18	0.0391304	0.0356436	0.0346154
573.163	460.634	1022.98		19	0.0413043	0.0376238	0.0365385
573.551	461.885	1027.3		20	0.0434783	0.039604	0.0384615
581.917	470.975	1049.32		21	0.0456522	0.0415842	0.0403846
583.03	473.848	1050.19		22	0.0478261	0.0435644	0.0423077
589.786	473.861	1069.23		23	0.05	0.0455446	0.0442308
591.231	479.776	1074.83		24	0.0521739	0.0475248	0.0461538
592.125	482.918	1080.09		25	0.0543478	0.049505	0.0480769
592.513	483.402	1090.78		26	0.0565217	0.0514851	0.05
593.352	495.116	1092.05		27	0.0586957	0.0534653	0.0519231
596.677	495.355	1094.03		28	0.0608696	0.0554455	0.0538462
603.198	499.777	1098.91		29	0.0630435	0.0574257	0.0557692
605.939	502.988	1110.78		30	0.0652174	0.0594059	0.0576923
609.815	513.447	1122.22		31	0.0673913	0.0613861	0.0596154
615.219	518.881	1123.51		32	0.0695652	0.0633663	0.0615385
618.89	525.325	1126.44		33	0.0717391	0.0653465	0.0634615
624.463	538.253	1128		34	0.073913	0.0673267	0.0653846
638.017	538.342	1146.29		35	0.076087	0.0693069	0.0673077
641.216	542.59	1151.11		36	0.0782609	0.0712871	0.0692308
643.17	548.382	1158.81		37	0.0804348	0.0732673	0.0711538
644.124	550.682	1163.96		38	0.0826087	0.0752475	0.0730769
651.447	555.237	1173.88		39	0.0847826	0.0772277	0.075
652.388	555.244	1175.78		40	0.0869565	0.0792079	0.0769231
661.25	556.111	1184.44		41	0.0891304	0.0811881	0.0788462
663.98	558.202	1190.81		42	0.0913043	0.0831683	0.0807692
665.432	566.319	1202.13		43	0.0934783	0.0851485	0.0826923
667.313	570.331	1202.15		44	0.0956522	0.0871287	0.0846154
668.101	571.121	1218.12		45	0.0978261	0.0891089	0.0865385
671.24	572.009	1225.31		46	0.1	0.0910891	0.0884615
676.079	575.167	1226.16		47	0.102174	0.0930693	0.0903846
679.613	579.37	1230.86		48	0.104348	0.0950495	0.0923077
681.478	579.828	1232.03		49	0.106522	0.0970297	0.0942308
688.747	580.69	1232.1		50	0.108696	0.0990099	0.0961538
694.19	586.948	1235.37		51	0.11087	0.10099	0.0980769
696.644	595.458	1237.43		52	0.113043	0.10297	0.1
698.887	610.242	1237.93		53	0.115217	0.10495	0.101923
699.64	614.864	1238.69		54	0.117391	0.106931	0.103846
703.386	615.059	1242.77		55	0.119565	0.108911	0.105769
709.764	619.066	1245.9		56	0.121739	0.110891	0.107692
711.57	629.109	1249.87		57	0.123913	0.112871	0.109615
712.415	633.439	1251.89		58	0.126087	0.114851	0.111538
712.69	635.448	1259.12		59	0.128261	0.116832	0.113462
716.436	641.08	1267.9		60	0.130435	0.118812	0.115385
717.472	643.665	1277.14		61	0.132609	0.120792	0.117308
721.264	646.775	1278.16		62	0.134783	0.122772	0.119231
729.585	650.042	1282.19		63	0.136957	0.124752	0.121154
730.428	652.082	1282.58		64	0.13913	0.126733	0.123077
738.294	653.842	1293.5		65	0.141304	0.128713	0.125
740.152	654.3	1293.97		66	0.143478	0.130693	0.126923
745.62	654.454	1297.73		67	0.145652	0.132673	0.128846
748.865	657	1302.1		68	0.147826	0.134653	0.130769
757.144	658.106	1302.57		69	0.15	0.136634	0.132692
767.392	658.95	1310.09		70	0.152174	0.138614	0.134615
767.985	659.536	1312.48		71	0.154348	0.140594	0.136538
770.68	659.548	1315.75		72	0.156522	0.142574	0.138462
773.417	662.023	1315.9		73	0.158696	0.144554	0.140385
774.744	665.455	1320.7		74	0.16087	0.146535	0.142308
775.793	666.078	1332.37		75	0.163043	0.148515	0.144231
777.061	677.991	1335.63		76	0.165217	0.150495	0.146154
782.445	678.55	1342.17		77	0.167391	0.152475	0.148077
784.281	680.009	1346.23		78	0.169565	0.154455	0.15
789.929	682.645	1346.34		79	0.171739	0.156436	0.151923
793.101	685.975	1347.75		80	0.173913	0.158416	0.153846
794.903	686.846	1349.66		81	0.176087	0.160396	0.155769
795.079	688.514	1350.72		82	0.178261	0.162376	0.157692
795.118	690.721	1351.55		83	0.180435	0.164356	0.159615
797.349	695.821	1364.76		84	0.182609	0.166337	0.161538
798.902	696.646	1366		85	0.184783	0.168317	0.163462
801.714	698.159	1367.15		86	0.186957	0.170297	0.165385
803.152	699.631	1367.24		87	0.18913	0.172277	0.167308
803.703	700.048	1369.34		88	0.191304	0.174257	0.169231
804.248	703.509	1377.15		89	0.193478	0.176238	0.171154
806.409	703.836	1381.32		90	0.195652	0.178218	0.173077
806.637	706.341	1385.36		91	0.197826	0.180198	0.175
806.805	708.351	1385.69		92	0.2	0.182178	0.176923
808.558	712.784	1387.07		93	0.202174	0.184158	0.178846
814.131	713.452	1391.36		94	0.204348	0.186139	0.180769
815.862	714.991	1391.97		95	0.206522	0.188119	0.182692
819.329	716.371	1395.74		96	0.208696	0.190099	0.184615
819.569	717.065	1405.81		97	0.21087	0.192079	0.186538
820.615	717.991	1406.55		98	0.213043	0.194059	0.188462
821.73	718.612	1407.05		99	0.215217	0.19604	0.190385
821.797	718.914	1407.18		100	0.217391	0.19802	0.192308
824.023	726.946	1410.77		101	0.219565	0.2	0.194231
831.693	728.715	1412.88		102	0.221739	0.20198	0.196154
834.709	729.165	1413.88		103	0.223913	0.20396	0.198077
836.263	730.439	1417.42		104	0.226087	0.205941	0.2
844.214	730.865	1424.84		105	0.228261	0.207921	0.201923
845.45	733.674	1425.49		106	0.230435	0.209901	0.203846
856.223	734.731	1426.19		107	0.232609	0.211881	0.205769
858.95	736.89	1430.89		108	0.234783	0.213861	0.207692
859.297	737.617	1434.31		109	0.236957	0.215842	0.209615
859.423	740.04	1438.79		110	0.23913	0.217822	0.211538
859.659	740.954	1447.06		111	0.241304	0.219802	0.213462
860.964	748.224	1449.27		112	0.243478	0.221782	0.215385
862.127	752.281	1451.49		113	0.245652	0.223762	0.217308
862.895	752.827	1451.56		114	0.247826	0.225743	0.219231
864.392	762.11	1454.05		115	0.25	0.227723	0.221154
865.146	769.818	1454.56		116	0.252174	0.229703	0.223077
865.257	770.121	1457.52		117	0.254348	0.231683	0.225
866.32	774.68	1459.87		118	0.256522	0.233663	0.226923
866.682	774.967	1460.77		119	0.258696	0.235644	0.228846
868.445	775.031	1463.46		120	0.26087	0.237624	0.230769
869.005	775.713	1473.14		121	0.263043	0.239604	0.232692
870.177	779.511	1474.82		122	0.265217	0.241584	0.234615
872.482	781.139	1482.44		123	0.267391	0.243564	0.236538
872.942	782.424	1483.25		124	0.269565	0.245545	0.238462
873.417	785.285	1487.94		125	0.271739	0.247525	0.240385
874.993	785.858	1493.52		126	0.273913	0.249505	0.242308
879.692	786.96	1494.28		127	0.276087	0.251485	0.244231
880.115	795.596	1498.81		128	0.278261	0.253465	0.246154
883.934	796.264	1501.6		129	0.280435	0.255446	0.248077
885.753	797.286	1502.17		130	0.282609	0.257426	0.25
887.167	799.009	1504.46		131	0.284783	0.259406	0.251923
888.298	799.202	1506.16		132	0.286957	0.261386	0.253846
888.541	799.509	1510.76		133	0.28913	0.263366	0.255769
888.601	800.702	1511.76		134	0.291304	0.265347	0.257692
891.737	801.74	1512.36		135	0.293478	0.267327	0.259615
892.982	802.194	1514.58		136	0.295652	0.269307	0.261538
902.756	807.659	1516.37		137	0.297826	0.271287	0.263462
902.867	809.172	1517.12		138	0.3	0.273267	0.265385
903.291	810.683	1519.47		139	0.302174	0.275248	0.267308
904.535	811.039	1529.54		140	0.304348	0.277228	0.269231
908.906	812.695	1532.71		141	0.306522	0.279208	0.271154
908.962	815.099	1533.81		142	0.308696	0.281188	0.273077
911.26	818.423	1536.68		143	0.31087	0.283168	0.275
911.703	819.628	1543.84		144	0.313043	0.285149	0.276923
914.296	823.607	1544.38		145	0.315217	0.287129	0.278846
915.033	824.961	1546.45		146	0.317391	0.289109	0.280769
915.741	826.261	1548.03		147	0.319565	0.291089	0.282692
916.901	826.506	1552.07		148	0.321739	0.293069	0.284615
917.558	827.408	1552.97		149	0.323913	0.29505	0.286538
920.76	827.525	1554.43		150	0.326087	0.29703	0.288462
922.073	831.896	1560.73		151	0.328261	0.29901	0.290385
922.499	832.464	1562.95		152	0.330435	0.30099	0.292308
922.738	833.136	1565.68		153	0.332609	0.30297	0.294231
926.799	833.874	1570.54		154	0.334783	0.30495	0.296154
926.951	838.883	1570.9		155	0.336957	0.306931	0.298077
934.493	841.924	1577.33		156	0.33913	0.308911	0.3
937.237	845.078	1578.59		157	0.341304	0.310891	0.301923
939.715	846.49	1580.08		158	0.343478	0.312871	0.303846
939.755	847.898	1584.35		159	0.345652	0.314851	0.305769
941.135	854.406	1586.39		160	0.347826	0.316832	0.307692
941.93	857.223	1587.49		161	0.35	0.318812	0.309615
942.127	866.341	1593.38		162	0.352174	0.320792	0.311538
946.002	866.773	1596.35		163	0.354348	0.322772	0.313462
946.445	867.042	1597.07		164	0.356522	0.324752	0.315385
947.088	867.071	1597.6		165	0.358696	0.326733	0.317308
947.23	870.49	1603.77		166	0.36087	0.328713	0.319231
947.688	871.755	1604.06		167	0.363043	0.330693	0.321154
947.734	873.449	1605.21		168	0.365217	0.332673	0.323077
948.579	873.641	1607.41		169	0.367391	0.334653	0.325
949.247	873.696	1609.31		170	0.369565	0.336634	0.326923
949.631	875.323	1609.61		171	0.371739	0.338614	0.328846
950.3	876.267	1610.82		172	0.373913	0.340594	0.330769
950.45	876.607	1611.64		173	0.376087	0.342574	0.332692
951.893	877.744	1611.91		174	0.378261	0.344554	0.334615
954.915	879.716	1612.27		175	0.380435	0.346535	0.336538
957.776	880.202	1612.45		176	0.382609	0.348515	0.338462
959.073	882.065	1615.41		177	0.384783	0.350495	0.340385
959.439	884.924	1619.84		178	0.386957	0.352475	0.342308
961.081	886.371	1619.98		179	0.38913	0.354455	0.344231
962.805	887.251	1620.56		180	0.391304	0.356436	0.346154
963.018	889.341	1624.97		181	0.393478	0.358416	0.348077
967.781	894.021	1628.38		182	0.395652	0.360396	0.35
969.733	896.138	1628.7		183	0.397826	0.362376	0.351923
972.392	896.442	1631.81		184	0.4	0.364356	0.353846
972.496	897.843	1632.64		185	0.402174	0.366337	0.355769
972.706	899.061	1635.6		186	0.404348	0.368317	0.357692
974.874	899.554	1643.86		187	0.406522	0.370297	0.359615
978.843	900.184	1644.47		188	0.408696	0.372277	0.361538
982.519	904.34	1644.85		189	0.41087	0.374257	0.363462
985.459	906.162	1645.09		190	0.413043	0.376238	0.365385
986.978	907.203	1645.91		191	0.415217	0.378218	0.367308
989.089	907.904	1647.75		192	0.417391	0.380198	0.369231
991.44	912.103	1656.39		193	0.419565	0.382178	0.371154
992.027	914.844	1662.35		194	0.421739	0.384158	0.373077
994.283	915.58	1663.54		195	0.423913	0.386139	0.375
995.091	916.283	1664.28		196	0.426087	0.388119	0.376923
995.275	916.293	1665.12		197	0.428261	0.390099	0.378846
996.911	916.879	1665.71		198	0.430435	0.392079	0.380769
996.931	918.008	1670.62		199	0.432609	0.394059	0.382692
997.325	919.637	1672.8		200	0.434783	0.39604	0.384615
1001.47	919.828	1677.26		201	0.436957	0.39802	0.386538
1002.32	919.92	1678.01		202	0.43913	0.4	0.388462
1003.55	920.504	1678.82		203	0.441304	0.40198	0.390385
1004.65	925.361	1681.24		204	0.443478	0.40396	0.392308
1005.86	925.52	1682.61		205	0.445652	0.405941	0.394231
1006.34	925.527	1683.53		206	0.447826	0.407921	0.396154
1006.58	925.816	1689.66		207	0.45	0.409901	0.398077
1008.93	928.04	1691.12		208	0.452174	0.411881	0.4
1011.37	928.314	1695.04		209	0.454348	0.413861	0.401923
1011.94	930.064	1696.23		210	0.456522	0.415842	0.403846
1012.01	933.737	1697.23		211	0.458696	0.417822	0.405769
1012.41	933.833	1697.3		212	0.46087	0.419802	0.407692
1012.91	936.228	1697.86		213	0.463043	0.421782	0.409615
1013.19	936.663	1701.71		214	0.465217	0.423762	0.411538
1013.63	936.964	1702.35		215	0.467391	0.425743	0.413462
1014.31	943.047	1710.91		216	0.469565	0.427723	0.415385
1014.79	945.64	1717.59		217	0.471739	0.429703	0.417308
1016.84	946.571	1720.75		218	0.473913	0.431683	0.419231
1020.83	947.318	1723.12		219	0.476087	0.433663	0.421154
1022.96	951.875	1724.06		220	0.478261	0.435644	0.423077
1025.57	956.204	1727.53		221	0.480435	0.437624	0.425
1032.37	958.013	1737.88		222	0.482609	0.439604	0.426923
1037.47	958.246	1741.53		223	0.484783	0.441584	0.428846
1038.95	959.156	1744.2		224	0.486957	0.443564	0.430769
1041.84	960.725	1744.27		225	0.48913	0.445545	0.432692
1044.38	961.121	1747.64		226	0.491304	0.447525	0.434615
1044.73	961.748	1748.77		227	0.493478	0.449505	0.436538
1045.01	962.993	1752.13		228	0.495652	0.451485	0.438462
1045.89	963.489	1752.87		229	0.497826	0.453465	0.440385
1047.31	965.126	1759.27		230	0.5	0.455446	0.442308
1047.46	965.486	1759.52		231	0.502174	0.457426	0.444231
1049.72	966.071	1761.23		232	0.504348	0.459406	0.446154
1050.36	966.969	1762.27		233	0.506522	0.461386	0.448077
1054.68	971.124	1766.12		234	0.508696	0.463366	0.45
1058.5	972.028	1767.09		235	0.51087	0.465347	0.451923
1060.44	976.657	1770.99		236	0.513043	0.467327	0.453846
1061.9	977.772	1772.55		237	0.515217	0.469307	0.455769
1063.09	980.383	1772.95		238	0.517391	0.471287	0.457692
1063.24	981.353	1774.35		239	0.519565	0.473267	0.459615
1065.56	981.449	1777.09		240	0.521739	0.475248	0.461538
1066.16	982.108	1778.47		241	0.523913	0.477228	0.463462
1068.18	983.88	1779.6		242	0.526087	0.479208	0.465385
1069.61	984.152	1780.91		243	0.528261	0.481188	0.467308
1070.64	988.701	1781.57		244	0.530435	0.483168	0.469231
1071.11	994.497	1782.79		245	0.532609	0.485149	0.471154
1071.43	995.414	1785.07		246	0.534783	0.487129	0.473077
1072.01	995.416	1791.06		247	0.536957	0.489109	0.475
1074.02	996.318	1801.46		248	0.53913	0.491089	0.476923
1074.45	997.433	1801.7		249	0.541304	0.493069	0.478846
1076.77	1002.5	1810.93		250	0.543478	0.49505	0.480769
1078.81	1002.97	1811.35		251	0.545652	0.49703	0.482692
1079.13	1003	1811.62		252	0.547826	0.49901	0.484615
1079.15	1003.02	1813.34		253	0.55	0.50099	0.486538
1079.39	1004.02	1814		254	0.552174	0.50297	0.488462
1080.96	1006.63	1817.21		255	0.554348	0.50495	0.490385
1083.58	1009.17	1819.41		256	0.556522	0.506931	0.492308
1084.5	1009.49	1822.6		257	0.558696	0.508911	0.494231
1084.62	1010.26	1823.8		258	0.56087	0.510891	0.496154
1085.14	1013.36	1825.1		259	0.563043	0.512871	0.498077
1085.99	1013.61	1828.19		260	0.565217	0.514851	0.5
1088.08	1016.97	1834.87		261	0.567391	0.516832	0.501923
1088.11	1017.49	1835.07		262	0.569565	0.518812	0.503846
1092.88	1017.92	1835.47		263	0.571739	0.520792	0.505769
1093.92	1018.77	1840.96		264	0.573913	0.522772	0.507692
1095.72	1020.23	1844.58		265	0.576087	0.524752	0.509615
1101.24	1021.48	1848.29		266	0.578261	0.526733	0.511538
1101.69	1022.33	1853.08		267	0.580435	0.528713	0.513462
1102.96	1025.31	1853.08		268	0.582609	0.530693	0.515385
1104.91	1027.21	1855.01		269	0.584783	0.532673	0.517308
1108.13	1028.13	1856.62		270	0.586957	0.534653	0.519231
1109.02	1032.02	1857.49		271	0.58913	0.536634	0.521154
1110.56	1032.1	1858.75		272	0.591304	0.538614	0.523077
1113.7	1032.57	1859.61		273	0.593478	0.540594	0.525
1114.61	1033.61	1860.05		274	0.595652	0.542574	0.526923
1115.46	1034.82	1862.68		275	0.597826	0.544554	0.528846
1117.03	1036.73	1864.43		276	0.6	0.546535	0.530769
1117.05	1038.32	1870.82		277	0.602174	0.548515	0.532692
1117.81	1038.32	1871.27		278	0.604348	0.550495	0.534615
1117.82	1040.37	1871.85		279	0.606522	0.552475	0.536538
1119.66	1044.8	1874.95		280	0.608696	0.554455	0.538462
1119.84	1045.77	1876.89		281	0.61087	0.556436	0.540385
1124.31	1048.02	1885.17		282	0.613043	0.558416	0.542308
1127.98	1051.62	1886.03		283	0.615217	0.560396	0.544231
1132.21	1058.93	1887		284	0.617391	0.562376	0.546154
1132.32	1059.4	1887.51		285	0.619565	0.564356	0.548077
1135.07	1060.01	1895.83		286	0.621739	0.566337	0.55
1136.19	1067.75	1902.01		287	0.623913	0.568317	0.551923
1136.97	1068.34	1902.35		288	0.626087	0.570297	0.553846
1137.8	1068.74	1902.54		289	0.628261	0.572277	0.555769
1139.91	1068.97	1903.65		290	0.630435	0.574257	0.557692
1140.65	1071.07	1907.34		291	0.632609	0.576238	0.559615
1141.3	1072.01	1914.71		292	0.634783	0.578218	0.561538
1142.8	1073.25	1914.92		293	0.636957	0.580198	0.563462
1143.32	1074.22	1917.89		294	0.63913	0.582178	0.565385
1144.52	1078.83	1919.73		295	0.641304	0.584158	0.567308
1148.21	1078.93	1921.6		296	0.643478	0.586139	0.569231
1148.49	1080.17	1922.82		297	0.645652	0.588119	0.571154
1150.48	1081.11	1931.45		298	0.647826	0.590099	0.573077
1150.74	1082.89	1932.61		299	0.65	0.592079	0.575
1152.69	1085.04	1932.81		300	0.652174	0.594059	0.576923
1155.59	1087.47	1934.33		301	0.654348	0.59604	0.578846
1156.02	1087.86	1943.25		302	0.656522	0.59802	0.580769
1159.3	1094.71	1944.62		303	0.658696	0.6	0.582692
1160.22	1095.22	1945.45		304	0.66087	0.60198	0.584615
1161.55	1096.02	1946.56		305	0.663043	0.60396	0.586538
1162.49	1098.27	1947.07		306	0.665217	0.605941	0.588462
1162.72	1100.85	1947.16		307	0.667391	0.607921	0.590385
1166.07	1102.41	1947.46		308	0.669565	0.609901	0.592308
1170.29	1104.56	1948.07		309	0.671739	0.611881	0.594231
1170.97	1106.47	1951.75		310	0.673913	0.613861	0.596154
1177.17	1107.55	1954.99		311	0.676087	0.615842	0.598077
1177.26	1109.85	1959.1		312	0.678261	0.617822	0.6
1185.88	1109.87	1961.55		313	0.680435	0.619802	0.601923
1186.99	1112.07	1964.93		314	0.682609	0.621782	0.603846
1187.27	1112.26	1973.06		315	0.684783	0.623762	0.605769
1189.19	1113.74	1977.42		316	0.686957	0.625743	0.607692
1190.82	1116.16	1981.26		317	0.68913	0.627723	0.609615
1192.1	1117.72	1982.3		318	0.691304	0.629703	0.611538
1194.73	1119.75	1983.12		319	0.693478	0.631683	0.613462
1194.99	1122.44	1984.49		320	0.695652	0.633663	0.615385
1195.35	1124.44	1988.22		321	0.697826	0.635644	0.617308
1195.79	1126.87	1990.97		322	0.7	0.637624	0.619231
1195.94	1128.52	1993.99		323	0.702174	0.639604	0.621154
1204.12	1129.49	1996.7		324	0.704348	0.641584	0.623077
1204.28	1129.6	2000.59		325	0.706522	0.643564	0.625
1207.09	1129.82	2001.12		326	0.708696	0.645545	0.626923
1207.34	1133	2007.55		327	0.71087	0.647525	0.628846
1208.36	1135.07	2011.35		328	0.713043	0.649505	0.630769
1209.19	1136.51	2018.42		329	0.715217	0.651485	0.632692
1209.33	1137.1	2023.77		330	0.717391	0.653465	0.634615
1209.75	1139.01	2027.11		331	0.719565	0.655446	0.636538
1211.83	1140.15	2030		332	0.721739	0.657426	0.638462
1213.73	1141.83	2035.28		333	0.723913	0.659406	0.640385
1217.98	1147.14	2036.8		334	0.726087	0.661386	0.642308
1219.71	1147.82	2039.52		335	0.728261	0.663366	0.644231
1224.41	1149.8	2054.48		336	0.730435	0.665347	0.646154
1225.05	1153.6	2056.27		337	0.732609	0.667327	0.648077
1228.73	1157.48	2057.27		338	0.734783	0.669307	0.65
1230.17	1165.68	2066.05		339	0.736957	0.671287	0.651923
1236.23	1166.6	2067.85		340	0.73913	0.673267	0.653846
1241.29	1167.17	2072.69		341	0.741304	0.675248	0.655769
1241.37	1167.46	2077.18		342	0.743478	0.677228	0.657692
1241.85	1167.85	2077.23		343	0.745652	0.679208	0.659615
1247.47	1169.68	2081.57		344	0.747826	0.681188	0.661538
1251.97	1170.18	2081.65		345	0.75	0.683168	0.663462
1253.36	1170.22	2083.21		346	0.752174	0.685149	0.665385
1253.74	1174.11	2084.04		347	0.754348	0.687129	0.667308
1254.66	1175.04	2085.93		348	0.756522	0.689109	0.669231
1255.11	1175.34	2087.16		349	0.758696	0.691089	0.671154
1257.44	1180.79	2087.72		350	0.76087	0.693069	0.673077
1258.72	1182.03	2093.13		351	0.763043	0.69505	0.675
1265.6	1182.49	2094.42		352	0.765217	0.69703	0.676923
1267.47	1182.57	2096.17		353	0.767391	0.69901	0.678846
1270.4	1183.21	2100.6		354	0.769565	0.70099	0.680769
1273.26	1183.86	2103.62		355	0.771739	0.70297	0.682692
1280.92	1186.72	2125.01		356	0.773913	0.70495	0.684615
1283.46	1187.94	2125.99		357	0.776087	0.706931	0.686538
1287.84	1191.22	2126.57		358	0.778261	0.708911	0.688462
1297.61	1192.01	2135.12		359	0.780435	0.710891	0.690385
1300	1201.57	2138.32		360	0.782609	0.712871	0.692308
1303.16	1207.65	2139.44		361	0.784783	0.714851	0.694231
1303.57	1212.53	2147.45		362	0.786957	0.716832	0.696154
1305.71	1213.43	2147.48		363	0.78913	0.718812	0.698077
1307.21	1214.65	2148.96		364	0.791304	0.720792	0.7
1309.89	1215.71	2148.99		365	0.793478	0.722772	0.701923
1312.44	1215.82	2149.72		366	0.795652	0.724752	0.703846
1319.69	1217.45	2152.22		367	0.797826	0.726733	0.705769
1323.06	1219.44	2153.23		368	0.8	0.728713	0.707692
1325.58	1220.26	2154.58		369	0.802174	0.730693	0.709615
1326.08	1222.24	2176.36		370	0.804348	0.732673	0.711538
1328.04	1225.52	2180.28		371	0.806522	0.734653	0.713462
1328.25	1225.97	2180.82		372	0.808696	0.736634	0.715385
1333.17	1231.04	2180.82		373	0.81087	0.738614	0.717308
1334.32	1231.1	2182.03		374	0.813043	0.740594	0.719231
1336.06	1232.49	2185.74		375	0.815217	0.742574	0.721154
1338.42	1233.19	2194.54		376	0.817391	0.744554	0.723077
1339.66	1234.62	2195.52		377	0.819565	0.746535	0.725
1340.24	1235.3	2202.66		378	0.821739	0.748515	0.726923
1340.37	1236.61	2206.11		379	0.823913	0.750495	0.728846
1344.62	1236.98	2208.36		380	0.826087	0.752475	0.730769
1349.18	1236.99	2215.34		381	0.828261	0.754455	0.732692
1351.8	1237.22	2216.22		382	0.830435	0.756436	0.734615
1354.55	1237.46	2219.02		383	0.832609	0.758416	0.736538
1355.94	1239.08	2221.45		384	0.834783	0.760396	0.738462
1360.61	1239.32	2223.37		385	0.836957	0.762376	0.740385
1366.83	1240.53	2228.18		386	0.83913	0.764356	0.742308
1368.96	1242.65	2228.34		387	0.841304	0.766337	0.744231
1374.99	1242.96	2232.52		388	0.843478	0.768317	0.746154
1375.47	1244.72	2235.89		389	0.845652	0.770297	0.748077
1378.63	1252.85	2240.04		390	0.847826	0.772277	0.75
1383.74	1258.35	2241.02		391	0.85	0.774257	0.751923
1385.23	1270.16	2243.73		392	0.852174	0.776238	0.753846
1392.2	1273.78	2244.06		393	0.854348	0.778218	0.755769
1398.71	1277.12	2246.59		394	0.856522	0.780198	0.757692
1401.27	1278.77	2247.48		395	0.858696	0.782178	0.759615
1401.83	1283.54	2257.62		396	0.86087	0.784158	0.761538
1402.33	1287.44	2271.12		397	0.863043	0.786139	0.763462
1412.77	1290.23	2274.3		398	0.865217	0.788119	0.765385
1419.44	1292.34	2276.4		399	0.867391	0.790099	0.767308
1419.94	1295.7	2279.07		400	0.869565	0.792079	0.769231
1420.59	1299.71	2282.61		401	0.871739	0.794059	0.771154
1422.82	1299.87	2289.69		402	0.873913	0.79604	0.773077
1437	1300.23	2306.74		403	0.876087	0.79802	0.775
1451.1	1303.28	2310.92		404	0.878261	0.8	0.776923
1464.88	1304.76	2312.18		405	0.880435	0.80198	0.778846
1475.09	1308.3	2314.31		406	0.882609	0.80396	0.780769
1477.4	1308.89	2316.12		407	0.884783	0.805941	0.782692
1478.03	1310.78	2327.51		408	0.886957	0.807921	0.784615
1507.05	1327.16	2333.47		409	0.88913	0.809901	0.786538
1508.38	1327.82	2343.51		410	0.891304	0.811881	0.788462
1508.86	1328.19	2343.84		411	0.893478	0.813861	0.790385
1510.97	1329.21	2350.81		412	0.895652	0.815842	0.792308
1519.27	1341.04	2366.09		413	0.897826	0.817822	0.794231
1525.46	1342.98	2367.68		414	0.9	0.819802	0.796154
1541.52	1344.36	2387.37		415	0.902174	0.821782	0.798077
1552.58	1346.03	2395.07		416	0.904348	0.823762	0.8
1557.01	1346.5	2403.57		417	0.906522	0.825743	0.801923
1580.62	1356.96	2405.91		418	0.908696	0.827723	0.803846
1596.27	1361.45	2410.52		419	0.91087	0.829703	0.805769
1601.5	1365.77	2414.34		420	0.913043	0.831683	0.807692
1611.67	1373.99	2420.1		421	0.915217	0.833663	0.809615
1618.34	1375.78	2420.25		422	0.917391	0.835644	0.811538
1624.62	1381.24	2426.11		423	0.919565	0.837624	0.813462
1675.22	1386.89	2435.81		424	0.921739	0.839604	0.815385
1681.16	1388.26	2439.66		425	0.923913	0.841584	0.817308
1692.29	1392.59	2449.01		426	0.926087	0.843564	0.819231
1709.29	1400.3	2450.59		427	0.928261	0.845545	0.821154
1715.66	1406.89	2458.25		428	0.930435	0.847525	0.823077
1718.04	1408.81	2463.23		429	0.932609	0.849505	0.825
1718.15	1412	2480.91		430	0.934783	0.851485	0.826923
1768.99	1412.26	2481.24		431	0.936957	0.853465	0.828846
1771.2	1416.47	2483.79		432	0.93913	0.855446	0.830769
1789.37	1419.46	2487.65		433	0.941304	0.857426	0.832692
1808.25	1423.09	2492.53		434	0.943478	0.859406	0.834615
1809.64	1424.28	2510.77		435	0.945652	0.861386	0.836538
1814.7	1427.37	2528.55		436	0.947826	0.863366	0.838462
1837.62	1430.86	2536.09		437	0.95	0.865347	0.840385
1841.95	1431.2	2547.24		438	0.952174	0.867327	0.842308
1849.79	1441.82	2595.39		439	0.954348	0.869307	0.844231
1861.67	1453.03	2604.47		440	0.956522	0.871287	0.846154
1883.93	1454.34	2616.16		441	0.958696	0.873267	0.848077
1885.89	1455.83	2624.49		442	0.96087	0.875248	0.85
1919.46	1457.11	2625.37		443	0.963043	0.877228	0.851923
1919.53	1463.08	2630.54		444	0.965217	0.879208	0.853846
1924.98	1465.73	2631.94		445	0.967391	0.881188	0.855769
1928.89	1476.41	2647.77		446	0.969565	0.883168	0.857692
1937.13	1476.85	2673.79		447	0.971739	0.885149	0.859615
1955.33	1477.85	2676.7		448	0.973913	0.887129	0.861538
1972.3	1485.28	2697.54		449	0.976087	0.889109	0.863462
1976.43	1489.81	2701.2		450	0.978261	0.891089	0.865385
1995.68	1489.84	2713.46		451	0.980435	0.893069	0.867308
2009.77	1522.15	2714.84		452	0.982609	0.89505	0.869231
2021.48	1522.16	2721.35		453	0.984783	0.89703	0.871154
2024.19	1526.15	2727.04		454	0.986957	0.89901	0.873077
2037.32	1527.39	2736.77		455	0.98913	0.90099	0.875
2196.53	1534.84	2741.89		456	0.991304	0.90297	0.876923
2501.48	1548.04	2746.81		457	0.993478	0.90495	0.878846
2662.29	1552.75	2758.5		458	0.995652	0.906931	0.880769
3285.42	1557.21	2758.73		459	0.997826	0.908911	0.882692
4317.12	1564.86	2762.08		460	1	0.910891	0.884615
	1567.94	2788.75		461		0.912871	0.886538
	1573.51	2790.55		462		0.914851	0.888462
	1585.32	2800.6		463		0.916832	0.890385
	1599.16	2801.43		464		0.918812	0.892308
	1603.49	2807.47		465		0.920792	0.894231
	1606.69	2813.91		466		0.922772	0.896154
	1607.94	2842.09		467		0.924752	0.898077
	1609.65	2848.15		468		0.926733	0.9
	1621.25	2851.29		469		0.928713	0.901923
	1631.69	2865.79		470		0.930693	0.903846
	1637.16	2971.55		471		0.932673	0.905769
	1647.57	3003.89		472		0.934653	0.907692
	1654.53	3017.99		473		0.936634	0.909615
	1655.31	3032.74		474		0.938614	0.911538
	1661.87	3058.07		475		0.940594	0.913462
	1677.37	3075.12		476		0.942574	0.915385
	1705.78	3123.72		477		0.944554	0.917308
	1720.67	3140.2		478		0.946535	0.919231
	1722.29	3162.32		479		0.948515	0.921154
	1735.04	3260.1		480		0.950495	0.923077
	1774.18	3271.07		481		0.952475	0.925
	1790.08	3283.75		482		0.954455	0.926923
	1814.33	3291.42		483		0.956436	0.928846
	1816.65	3293.22		484		0.958416	0.930769
	1823.8	3295.53		485		0.960396	0.932692
	1833.65	3302.58		486		0.962376	0.934615
	1849.47	3316.72		487		0.964356	0.936538
	1898.16	3318.62		488		0.966337	0.938462
	1904.78	3419.77		489		0.968317	0.940385
	1920.17	3437.2		490		0.970297	0.942308
	1934.79	3446.33		491		0.972277	0.944231
	1952.15	3474.22		492		0.974257	0.946154
	1993.97	3511.04		493		0.976238	0.948077
	2010.07	3524.95		494		0.978218	0.95
	2090.42	3603.67		495		0.980198	0.951923
	2233.66	3690.44		496		0.982178	0.953846
	2236.95	3696.6		497		0.984158	0.955769
	2253.23	3699.43		498		0.986139	0.957692
	2270.61	3720.3		499		0.988119	0.959615
	2576.61	3739.86		500		0.990099	0.961538
	2605.62	3801.93		501		0.992079	0.963462
	2674.34	3803.1		502		0.994059	0.965385
	2679.14	3922.82		503		0.99604	0.967308
	2932.01	3935.55		504		0.99802	0.969231
	3249.66	3993.84		505		1	0.971154
		4196.03		506			0.973077
		4249.16		507			0.975
		4320.22		508			0.976923
		4370.1		509			0.978846
		4429.66		510			0.980769
		4549.79		511			0.982692
		4660.17		512			0.984615
		4694.89		513			0.986538
		4762.6		514			0.988462
		4966.94		515			0.990385
		5483.14		516			0.992308
		6079.39		517			0.994231
		6151.72		518			0.996154
		6506.25		519			0.998077
		8211.96		520			1

## Sheet: Fig 5C
K105Q K109Q
20	70	0 Ca			Cum. Prob. 20	Cum. Prob. 70	Cum. Prob. 0 Ca
168.532	187.946	588.382		1	0.00294118	0.00298507	0.00283286
169.468	205.751	591.912		2	0.00588235	0.00597015	0.00566572
198.94	215.786	608.751		3	0.00882353	0.00895522	0.00849858
223.543	216.833	617.562		4	0.0117647	0.0119403	0.0113314
224.889	265.512	731.717		5	0.0147059	0.0149254	0.0141643
226.568	273.216	750.177		6	0.0176471	0.0179104	0.0169972
287.762	282.615	788.823		7	0.0205882	0.0208955	0.01983
287.882	289.438	808.957		8	0.0235294	0.0238806	0.0226629
308.359	317.464	834.034		9	0.0264706	0.0268657	0.0254958
309.398	319.509	867.526		10	0.0294118	0.0298507	0.0283286
323.928	324.443	877.792		11	0.0323529	0.0328358	0.0311615
333.734	324.876	894.33		12	0.0352941	0.0358209	0.0339943
337.889	328.869	897.372		13	0.0382353	0.038806	0.0368272
341.37	333.278	901.598		14	0.0411765	0.041791	0.0396601
349.653	349.033	904.94		15	0.0441176	0.0447761	0.0424929
353.704	357.274	909.134		16	0.0470588	0.0477612	0.0453258
365.199	363.066	912.875		17	0.05	0.0507463	0.0481586
369.172	363.892	934.464		18	0.0529412	0.0537313	0.0509915
389.738	367.829	957.128		19	0.0558824	0.0567164	0.0538244
391.59	369.332	977.992		20	0.0588235	0.0597015	0.0566572
406.303	381.007	982.344		21	0.0617647	0.0626866	0.0594901
410.82	390.4	1003.76		22	0.0647059	0.0656716	0.0623229
425.458	392.843	1008.73		23	0.0676471	0.0686567	0.0651558
442.659	402.263	1017.11		24	0.0705882	0.0716418	0.0679887
449.792	406.491	1025.89		25	0.0735294	0.0746269	0.0708215
453.932	415.171	1030.91		26	0.0764706	0.0776119	0.0736544
462.464	420.091	1045.43		27	0.0794118	0.080597	0.0764873
462.831	421.412	1046.2		28	0.0823529	0.0835821	0.0793201
463.45	435.318	1048.58		29	0.0852941	0.0865672	0.082153
474.188	438.737	1068.58		30	0.0882353	0.0895522	0.0849858
479.156	439.475	1093.34		31	0.0911765	0.0925373	0.0878187
479.56	439.726	1108.26		32	0.0941176	0.0955224	0.0906516
481.047	441.664	1110.98		33	0.0970588	0.0985075	0.0934844
486.361	442.253	1130.81		34	0.1	0.101493	0.0963173
487.403	448.57	1145.33		35	0.102941	0.104478	0.0991501
498.526	460.165	1152.38		36	0.105882	0.107463	0.101983
498.939	460.854	1159.53		37	0.108824	0.110448	0.104816
511.858	465.433	1170.3		38	0.111765	0.113433	0.107649
517.929	470.404	1181.11		39	0.114706	0.116418	0.110482
518.311	478.648	1191.61		40	0.117647	0.119403	0.113314
518.395	479.238	1199.33		41	0.120588	0.122388	0.116147
521.8	486.764	1199.54		42	0.123529	0.125373	0.11898
531.095	487.851	1207.89		43	0.126471	0.128358	0.121813
536.145	489.087	1225.5		44	0.129412	0.131343	0.124646
550.125	489.322	1229.5		45	0.132353	0.134328	0.127479
556.365	490.141	1230.38		46	0.135294	0.137313	0.130312
558.712	491.062	1232.35		47	0.138235	0.140299	0.133144
564.71	491.408	1248.18		48	0.141176	0.143284	0.135977
574.442	493.613	1252.33		49	0.144118	0.146269	0.13881
574.444	494.883	1257.71		50	0.147059	0.149254	0.141643
576.372	494.883	1259.63		51	0.15	0.152239	0.144476
581.652	495.291	1265.33		52	0.152941	0.155224	0.147309
582.283	498.441	1275.25		53	0.155882	0.158209	0.150142
585.705	501.629	1276.41		54	0.158824	0.161194	0.152975
586.334	502.507	1278.24		55	0.161765	0.164179	0.155807
586.807	507.673	1290.32		56	0.164706	0.167164	0.15864
589.382	510.793	1292.03		57	0.167647	0.170149	0.161473
589.399	514.371	1299.36		58	0.170588	0.173134	0.164306
589.702	524.526	1312.61		59	0.173529	0.176119	0.167139
595.843	524.719	1313.45		60	0.176471	0.179104	0.169972
596.874	525.133	1324.52		61	0.179412	0.18209	0.172805
599.979	532.602	1324.67		62	0.182353	0.185075	0.175637
601.729	532.958	1330.35		63	0.185294	0.18806	0.17847
602.633	535.44	1343.56		64	0.188235	0.191045	0.181303
605.924	535.596	1375.59		65	0.191176	0.19403	0.184136
607.049	542.797	1376.14		66	0.194118	0.197015	0.186969
610.214	548.079	1388.01		67	0.197059	0.2	0.189802
611.017	552.317	1399.49		68	0.2	0.202985	0.192635
613.935	553.673	1401.56		69	0.202941	0.20597	0.195467
615.68	555.284	1406.29		70	0.205882	0.208955	0.1983
615.682	556.678	1409.86		71	0.208824	0.21194	0.201133
616.127	558.618	1422.14		72	0.211765	0.214925	0.203966
616.238	559.071	1423.41		73	0.214706	0.21791	0.206799
620.133	559.077	1428.39		74	0.217647	0.220896	0.209632
624.873	560.872	1430.91		75	0.220588	0.223881	0.212465
626.112	563.755	1431.02		76	0.223529	0.226866	0.215297
629.218	564.787	1435.57		77	0.226471	0.229851	0.21813
632.138	566.263	1437.5		78	0.229412	0.232836	0.220963
634.614	567.956	1454.84		79	0.232353	0.235821	0.223796
634.684	577.878	1470.43		80	0.235294	0.238806	0.226629
636.009	588.065	1473.86		81	0.238235	0.241791	0.229462
640.477	590.674	1485.27		82	0.241176	0.244776	0.232295
645.697	591.106	1498.59		83	0.244118	0.247761	0.235127
650.383	591.272	1501.76		84	0.247059	0.250746	0.23796
654.639	593.896	1511.66		85	0.25	0.253731	0.240793
656.784	595.43	1513.09		86	0.252941	0.256716	0.243626
657.91	601.704	1517.28		87	0.255882	0.259701	0.246459
658.96	601.79	1531.15		88	0.258824	0.262687	0.249292
659.07	606.619	1537.13		89	0.261765	0.265672	0.252125
660.837	607.451	1538.71		90	0.264706	0.268657	0.254958
663.151	609.202	1561.57		91	0.267647	0.271642	0.25779
665.247	612.591	1567.33		92	0.270588	0.274627	0.260623
666.022	616.21	1575.95		93	0.273529	0.277612	0.263456
667.929	616.992	1584.65		94	0.276471	0.280597	0.266289
671.681	623.199	1588		95	0.279412	0.283582	0.269122
672.505	630.026	1598.59		96	0.282353	0.286567	0.271955
672.738	637.942	1604.96		97	0.285294	0.289552	0.274788
676.951	637.961	1615.33		98	0.288235	0.292537	0.27762
677.336	638.703	1620.53		99	0.291176	0.295522	0.280453
683.283	639.399	1632		100	0.294118	0.298507	0.283286
685.942	641.151	1638.26		101	0.297059	0.301493	0.286119
687.862	645.01	1646.01		102	0.3	0.304478	0.288952
690.628	645.675	1652.37		103	0.302941	0.307463	0.291785
691.132	645.997	1664.97		104	0.305882	0.310448	0.294618
695.022	651.113	1728.96		105	0.308824	0.313433	0.29745
702.398	655.118	1743.36		106	0.311765	0.316418	0.300283
703.578	656.939	1771.91		107	0.314706	0.319403	0.303116
706.221	665.23	1778.83		108	0.317647	0.322388	0.305949
706.756	665.83	1780.45		109	0.320588	0.325373	0.308782
707.965	667.65	1782.41		110	0.323529	0.328358	0.311615
709.011	668.485	1802.7		111	0.326471	0.331343	0.314448
713.97	670.462	1811.95		112	0.329412	0.334328	0.31728
715.929	672.822	1820.73		113	0.332353	0.337313	0.320113
717.189	675.627	1839.44		114	0.335294	0.340299	0.322946
723.756	676.027	1841.6		115	0.338235	0.343284	0.325779
726.142	678.094	1844.59		116	0.341176	0.346269	0.328612
727.528	682.387	1849.21		117	0.344118	0.349254	0.331445
732.567	684.349	1852.5		118	0.347059	0.352239	0.334278
736.645	687.322	1861.4		119	0.35	0.355224	0.33711
736.956	695.745	1862.34		120	0.352941	0.358209	0.339943
739.335	699.308	1868.14		121	0.355882	0.361194	0.342776
742.708	703.216	1869.27		122	0.358824	0.364179	0.345609
746.463	711.398	1871.26		123	0.361765	0.367164	0.348442
749.193	712.04	1885.04		124	0.364706	0.370149	0.351275
750.188	712.917	1897.5		125	0.367647	0.373134	0.354108
753.004	713.702	1906.95		126	0.370588	0.376119	0.356941
753.97	715.393	1908.07		127	0.373529	0.379104	0.359773
754.12	715.666	1915.42		128	0.376471	0.38209	0.362606
755.782	718.211	1916.95		129	0.379412	0.385075	0.365439
756.08	718.681	1928.4		130	0.382353	0.38806	0.368272
761.793	719.346	1943.66		131	0.385294	0.391045	0.371105
776.42	720.84	1964.03		132	0.388235	0.39403	0.373938
780.22	722.043	1966.33		133	0.391176	0.397015	0.376771
781.699	727.868	1986.41		134	0.394118	0.4	0.379603
782.373	731.253	2000.54		135	0.397059	0.402985	0.382436
784.745	738.841	2006.1		136	0.4	0.40597	0.385269
784.839	739.932	2009.04		137	0.402941	0.408955	0.388102
797.257	744.205	2013.22		138	0.405882	0.41194	0.390935
799.582	746.349	2013.54		139	0.408824	0.414925	0.393768
799.963	755.334	2015.16		140	0.411765	0.41791	0.396601
801.177	758.215	2017.96		141	0.414706	0.420896	0.399433
805.99	760.1	2027.19		142	0.417647	0.423881	0.402266
808.479	766.474	2031.77		143	0.420588	0.426866	0.405099
812.534	769.771	2039.43		144	0.423529	0.429851	0.407932
815.3	769.897	2041.28		145	0.426471	0.432836	0.410765
815.534	776.871	2048.22		146	0.429412	0.435821	0.413598
815.674	777.722	2065.49		147	0.432353	0.438806	0.416431
820.777	777.726	2072.39		148	0.435294	0.441791	0.419263
831.482	778.057	2085.26		149	0.438235	0.444776	0.422096
832.165	778.345	2085.99		150	0.441176	0.447761	0.424929
833.039	780.469	2094.29		151	0.444118	0.450746	0.427762
834.782	788.523	2098.41		152	0.447059	0.453731	0.430595
838.281	789.774	2104.11		153	0.45	0.456716	0.433428
839.372	793.524	2124.84		154	0.452941	0.459701	0.436261
841.736	802.402	2169.73		155	0.455882	0.462687	0.439093
842.999	804.344	2174.29		156	0.458824	0.465672	0.441926
846.4	806.002	2176.52		157	0.461765	0.468657	0.444759
847.877	813.439	2182.55		158	0.464706	0.471642	0.447592
853.021	816.789	2182.93		159	0.467647	0.474627	0.450425
854.274	826.876	2191.84		160	0.470588	0.477612	0.453258
854.948	833.979	2199.8		161	0.473529	0.480597	0.456091
858.834	834.499	2204.45		162	0.476471	0.483582	0.458924
863.173	836.816	2226.65		163	0.479412	0.486567	0.461756
865.327	837.305	2233.46		164	0.482353	0.489552	0.464589
874.654	840.355	2236.59		165	0.485294	0.492537	0.467422
877.958	843.471	2238.19		166	0.488235	0.495522	0.470255
880.287	845.795	2239.85		167	0.491176	0.498507	0.473088
890.597	849.243	2241.96		168	0.494118	0.501493	0.475921
891.671	849.25	2254.3		169	0.497059	0.504478	0.478754
896.742	853.776	2261.59		170	0.5	0.507463	0.481586
898.436	855.342	2272.09		171	0.502941	0.510448	0.484419
899.62	855.981	2293.65		172	0.505882	0.513433	0.487252
901.492	857.884	2294.74		173	0.508824	0.516418	0.490085
905.014	860.715	2296.02		174	0.511765	0.519403	0.492918
905.313	862.422	2311.16		175	0.514706	0.522388	0.495751
917.862	864.585	2325.64		176	0.517647	0.525373	0.498584
919.879	871.464	2326.58		177	0.520588	0.528358	0.501416
921.226	872.385	2353.36		178	0.523529	0.531343	0.504249
922.951	874.221	2356.8		179	0.526471	0.534328	0.507082
925.068	874.221	2371.82		180	0.529412	0.537313	0.509915
925.83	878.117	2381.78		181	0.532353	0.540299	0.512748
928.036	878.759	2397.45		182	0.535294	0.543284	0.515581
929.295	878.773	2399.72		183	0.538235	0.546269	0.518414
929.493	879.179	2406.11		184	0.541176	0.549254	0.521246
936.754	888.36	2412.37		185	0.544118	0.552239	0.524079
937.054	888.413	2419.12		186	0.547059	0.555224	0.526912
939.034	894.894	2423.23		187	0.55	0.558209	0.529745
939.505	897.961	2435.76		188	0.552941	0.561194	0.532578
940.67	898.82	2442.38		189	0.555882	0.564179	0.535411
945.159	905.32	2451.41		190	0.558824	0.567164	0.538244
955.747	907.79	2453.03		191	0.561765	0.570149	0.541076
957.058	911.97	2453.94		192	0.564706	0.573134	0.543909
958.282	912.308	2457.82		193	0.567647	0.576119	0.546742
960.158	913.928	2458.61		194	0.570588	0.579104	0.549575
967.229	914.715	2470.12		195	0.573529	0.58209	0.552408
967.247	915.114	2475.68		196	0.576471	0.585075	0.555241
977.495	919.685	2484.49		197	0.579412	0.58806	0.558074
977.908	920.581	2496.84		198	0.582353	0.591045	0.560907
981.856	924.169	2500.84		199	0.585294	0.59403	0.563739
982.864	926.148	2512.57		200	0.588235	0.597015	0.566572
984.85	926.893	2515.53		201	0.591176	0.6	0.569405
987.001	929.616	2516.41		202	0.594118	0.602985	0.572238
987.251	929.974	2516.75		203	0.597059	0.60597	0.575071
987.831	931.499	2528.04		204	0.6	0.608955	0.577904
998.727	936.982	2528.73		205	0.602941	0.61194	0.580737
1002.62	939.441	2528.83		206	0.605882	0.614925	0.583569
1007.74	955.614	2550.29		207	0.608824	0.61791	0.586402
1009.62	955.622	2570.31		208	0.611765	0.620896	0.589235
1016.82	957.844	2571.98		209	0.614706	0.623881	0.592068
1017.14	958.483	2588.75		210	0.617647	0.626866	0.594901
1025.48	958.785	2593.07		211	0.620588	0.629851	0.597734
1028.05	967.511	2603.25		212	0.623529	0.632836	0.600567
1035.08	975.862	2631.18		213	0.626471	0.635821	0.603399
1037.42	976.648	2638.9		214	0.629412	0.638806	0.606232
1040.57	977.056	2650.67		215	0.632353	0.641791	0.609065
1058.46	984.764	2651.45		216	0.635294	0.644776	0.611898
1059.05	985.557	2654.97		217	0.638235	0.647761	0.614731
1061.32	999.893	2656.43		218	0.641176	0.650746	0.617564
1070.91	1003.03	2656.91		219	0.644118	0.653731	0.620397
1074.54	1003.17	2663.46		220	0.647059	0.656716	0.623229
1074.99	1003.59	2666.41		221	0.65	0.659701	0.626062
1077.55	1009.25	2666.8		222	0.652941	0.662687	0.628895
1081.72	1009.98	2680.57		223	0.655882	0.665672	0.631728
1081.89	1010.31	2706.23		224	0.658824	0.668657	0.634561
1087.03	1020.22	2724.34		225	0.661765	0.671642	0.637394
1094.54	1020.89	2730.65		226	0.664706	0.674627	0.640227
1098.75	1021.45	2747.68		227	0.667647	0.677612	0.643059
1099.99	1022.19	2752.26		228	0.670588	0.680597	0.645892
1106.15	1022.4	2763.02		229	0.673529	0.683582	0.648725
1113.34	1022.42	2774.35		230	0.676471	0.686567	0.651558
1128.12	1025.36	2785.3		231	0.679412	0.689552	0.654391
1132	1025.47	2802.51		232	0.682353	0.692537	0.657224
1134.22	1026.97	2809.87		233	0.685294	0.695522	0.660057
1143.78	1034.19	2824.95		234	0.688235	0.698507	0.66289
1144.45	1037.71	2826.5		235	0.691176	0.701493	0.665722
1149.08	1039.24	2828.14		236	0.694118	0.704478	0.668555
1157.43	1047.1	2831.44		237	0.697059	0.707463	0.671388
1160.96	1047.69	2831.84		238	0.7	0.710448	0.674221
1162.92	1051.71	2845.91		239	0.702941	0.713433	0.677054
1164.21	1055.66	2849.04		240	0.705882	0.716418	0.679887
1166.57	1059.04	2854.22		241	0.708824	0.719403	0.68272
1169.36	1060.08	2860.84		242	0.711765	0.722388	0.685552
1172.34	1061.36	2861.55		243	0.714706	0.725373	0.688385
1174.07	1062.76	2886.3		244	0.717647	0.728358	0.691218
1177.73	1066.12	2908.74		245	0.720588	0.731343	0.694051
1182.15	1076.81	2913.51		246	0.723529	0.734328	0.696884
1185.68	1080.6	2931.35		247	0.726471	0.737313	0.699717
1197.93	1081.36	2933.58		248	0.729412	0.740299	0.70255
1199.96	1093.16	2938.59		249	0.732353	0.743284	0.705382
1205.37	1100.7	2944.45		250	0.735294	0.746269	0.708215
1205.65	1108.21	2945.91		251	0.738235	0.749254	0.711048
1213.14	1120.36	2947.39		252	0.741176	0.752239	0.713881
1214.37	1120.71	2954.94		253	0.744118	0.755224	0.716714
1215.48	1122.36	2969.79		254	0.747059	0.758209	0.719547
1215.64	1126.3	2974.79		255	0.75	0.761194	0.72238
1218.76	1132.64	2977.54		256	0.752941	0.764179	0.725212
1223.82	1135.59	2978.58		257	0.755882	0.767164	0.728045
1229.17	1143.68	2987.92		258	0.758824	0.770149	0.730878
1240.29	1150.25	2990.49		259	0.761765	0.773134	0.733711
1243.23	1150.55	3016.95		260	0.764706	0.776119	0.736544
1254.39	1154.48	3034.78		261	0.767647	0.779104	0.739377
1256.55	1158.81	3035.93		262	0.770588	0.78209	0.74221
1263.31	1164.86	3046.64		263	0.773529	0.785075	0.745042
1268.66	1168.69	3084.84		264	0.776471	0.78806	0.747875
1269.57	1177.97	3107.12		265	0.779412	0.791045	0.750708
1270.59	1185	3110.14		266	0.782353	0.79403	0.753541
1272.28	1192.55	3119.33		267	0.785294	0.797015	0.756374
1273.52	1193.56	3127.52		268	0.788235	0.8	0.759207
1277.41	1198.49	3129.24		269	0.791176	0.802985	0.76204
1283.9	1210.53	3129.28		270	0.794118	0.80597	0.764873
1284.61	1211.3	3146.12		271	0.797059	0.808955	0.767705
1285.36	1211.76	3154.11		272	0.8	0.81194	0.770538
1286.39	1217.27	3165.91		273	0.802941	0.814925	0.773371
1289.52	1237.61	3172.94		274	0.805882	0.81791	0.776204
1290.29	1237.65	3202		275	0.808824	0.820896	0.779037
1290.56	1250.19	3211.58		276	0.811765	0.823881	0.78187
1292.2	1254.29	3269.16		277	0.814706	0.826866	0.784703
1292.95	1254.64	3278.28		278	0.817647	0.829851	0.787535
1305.52	1270.51	3280.48		279	0.820588	0.832836	0.790368
1305.55	1280.32	3282.57		280	0.823529	0.835821	0.793201
1315.3	1288.55	3320.97		281	0.826471	0.838806	0.796034
1320.86	1299.37	3323.35		282	0.829412	0.841791	0.798867
1331.09	1319.31	3354.63		283	0.832353	0.844776	0.8017
1331.95	1319.81	3368.09		284	0.835294	0.847761	0.804533
1332.64	1329.2	3376.67		285	0.838235	0.850746	0.807365
1336.76	1356.32	3391.77		286	0.841176	0.853731	0.810198
1340.04	1359.99	3414.73		287	0.844118	0.856716	0.813031
1340.05	1362.53	3414.75		288	0.847059	0.859701	0.815864
1341.18	1364.28	3424.55		289	0.85	0.862687	0.818697
1382.83	1401.41	3428.52		290	0.852941	0.865672	0.82153
1390.56	1418.9	3446.56		291	0.855882	0.868657	0.824363
1404.52	1447.86	3450.6		292	0.858824	0.871642	0.827195
1415.93	1465.23	3457.55		293	0.861765	0.874627	0.830028
1426.24	1473.57	3460.63		294	0.864706	0.877612	0.832861
1433.63	1476.24	3465.26		295	0.867647	0.880597	0.835694
1444.77	1484.66	3472.37		296	0.870588	0.883582	0.838527
1451.73	1510.34	3487.89		297	0.873529	0.886567	0.84136
1460.19	1523.09	3489.64		298	0.876471	0.889552	0.844193
1467.42	1529.05	3496.86		299	0.879412	0.892537	0.847025
1481.78	1532.09	3505.18		300	0.882353	0.895522	0.849858
1488.7	1541.89	3510.88		301	0.885294	0.898507	0.852691
1496.33	1546.14	3526.5		302	0.888235	0.901493	0.855524
1523.22	1551.99	3542.23		303	0.891176	0.904478	0.858357
1535.2	1556.09	3557.48		304	0.894118	0.907463	0.86119
1536.91	1557.29	3588.93		305	0.897059	0.910448	0.864023
1582.72	1573.44	3599.43		306	0.9	0.913433	0.866856
1588.08	1593.26	3649.03		307	0.902941	0.916418	0.869688
1623.22	1596.07	3649.37		308	0.905882	0.919403	0.872521
1625.55	1607.72	3680.16		309	0.908824	0.922388	0.875354
1650.48	1612.22	3693.53		310	0.911765	0.925373	0.878187
1663.53	1614.9	3696.54		311	0.914706	0.928358	0.88102
1678.48	1656.28	3704.72		312	0.917647	0.931343	0.883853
1687.51	1683.92	3739.26		313	0.920588	0.934328	0.886686
1707.55	1739.01	3740.06		314	0.923529	0.937313	0.889518
1780.01	1740.69	3775.95		315	0.926471	0.940299	0.892351
1789.6	1741.13	3793.99		316	0.929412	0.943284	0.895184
1855.9	1752.03	3805.05		317	0.932353	0.946269	0.898017
1856.59	1757.35	3836.66		318	0.935294	0.949254	0.90085
1858.29	1803.2	3908		319	0.938235	0.952239	0.903683
1878.3	1808.07	4023.39		320	0.941176	0.955224	0.906516
1880.92	1817.44	4062.19		321	0.944118	0.958209	0.909348
1883.12	1832.42	4126.61		322	0.947059	0.961194	0.912181
1901.82	1866.53	4150.1		323	0.95	0.964179	0.915014
1905.77	1868.49	4210.83		324	0.952941	0.967164	0.917847
1911.76	1971.88	4218.9		325	0.955882	0.970149	0.92068
1918.5	1986.44	4256.35		326	0.958824	0.973134	0.923513
1936.97	2002.78	4295.8		327	0.961765	0.976119	0.926346
1965.61	2062.03	4304.1		328	0.964706	0.979104	0.929178
2043.42	2275.39	4316.33		329	0.967647	0.98209	0.932011
2083.14	2326.35	4414.06		330	0.970588	0.985075	0.934844
2101.89	2617.08	4447.93		331	0.973529	0.98806	0.937677
2154.28	2637.36	4519.09		332	0.976471	0.991045	0.94051
2235.74	2748.93	4530.72		333	0.979412	0.99403	0.943343
2356.49	2816.16	4549.45		334	0.982353	0.997015	0.946176
2391.07	3667.28	4591.21		335	0.985294	1	0.949008
2423.3		4758.61		336	0.988235		0.951841
2442.44		4854.56		337	0.991176		0.954674
2535.54		4881.32		338	0.994118		0.957507
2878.25		4906.63		339	0.997059		0.96034
2998.92		4995.84		340	1		0.963173
		5046.37		341			0.966006
		5050.64		342			0.968839
		5340.91		343			0.971671
		5397.88		344			0.974504
		5446.24		345			0.977337
		5513.71		346			0.98017
		5520.31		347			0.983003
		5598.97		348			0.985836
		5687.38		349			0.988669
		6278.31		350			0.991501
		6641.8		351			0.994334
		6704.19		352			0.997167
		6881.99		353			1

## Sheet: Fig 5D
K105Q K234Q
20	70	0 Ca			Cum. Prob. 20	Cum. Prob. 70	Cum. Prob. 0 Ca
311.681	55.643	428.771		1	0.0030581	0.00277778	0.00275482
341.054	156.397	709.672		2	0.00611621	0.00555556	0.00550964
356.743	329.831	1003.15		3	0.00917431	0.00833333	0.00826446
368.609	341.184	1024.95		4	0.0122324	0.0111111	0.0110193
400.286	363.56	1064.57		5	0.0152905	0.0138889	0.0137741
400.294	387.517	1080.55		6	0.0183486	0.0166667	0.0165289
404.827	429.659	1107.57		7	0.0214067	0.0194444	0.0192837
424.611	431.88	1137.06		8	0.0244648	0.0222222	0.0220386
430.263	435.229	1159.56		9	0.0275229	0.025	0.0247934
445.788	475.289	1216.33		10	0.030581	0.0277778	0.0275482
447.426	536.688	1225.19		11	0.0336391	0.0305556	0.030303
457.211	542.287	1258.46		12	0.0366972	0.0333333	0.0330579
475.482	562.541	1297.95		13	0.0397554	0.0361111	0.0358127
516.791	580.745	1303.19		14	0.0428135	0.0388889	0.0385675
529.577	588.473	1336.64		15	0.0458716	0.0416667	0.0413223
531.036	615.19	1337.57		16	0.0489297	0.0444444	0.0440771
531.825	617.153	1342.11		17	0.0519878	0.0472222	0.046832
549.377	619.73	1343.83		18	0.0550459	0.05	0.0495868
575.265	620.634	1356.02		19	0.058104	0.0527778	0.0523416
581.78	623.028	1383.47		20	0.0611621	0.0555556	0.0550964
586.396	623.631	1414.73		21	0.0642202	0.0583333	0.0578512
588.908	630.929	1461.84		22	0.0672783	0.0611111	0.0606061
640.885	633.864	1467.75		23	0.0703364	0.0638889	0.0633609
662.427	636.601	1523.22		24	0.0733945	0.0666667	0.0661157
665.83	643.684	1538.7		25	0.0764526	0.0694444	0.0688705
666.541	652.349	1577.56		26	0.0795107	0.0722222	0.0716253
667.046	658.438	1579.12		27	0.0825688	0.075	0.0743802
671.318	659.628	1580.91		28	0.0856269	0.0777778	0.077135
677.9	660.103	1587.38		29	0.088685	0.0805556	0.0798898
689.152	663.444	1598.58		30	0.0917431	0.0833333	0.0826446
690.904	676.356	1627.09		31	0.0948012	0.0861111	0.0853994
695.454	679.772	1627.55		32	0.0978593	0.0888889	0.0881543
708.8	683.512	1640.74		33	0.100917	0.0916667	0.0909091
731.716	721.586	1640.85		34	0.103976	0.0944444	0.0936639
732.118	723.773	1656.65		35	0.107034	0.0972222	0.0964187
750.622	725.286	1680.44		36	0.110092	0.1	0.0991736
754.007	728.008	1682.47		37	0.11315	0.102778	0.101928
767.913	728.706	1687.58		38	0.116208	0.105556	0.104683
774.273	729.543	1695.79		39	0.119266	0.108333	0.107438
776.102	734.03	1704.25		40	0.122324	0.111111	0.110193
781.978	735.945	1714.12		41	0.125382	0.113889	0.112948
783.028	740.05	1714.22		42	0.12844	0.116667	0.115702
794.71	742.754	1718.42		43	0.131498	0.119444	0.118457
799.494	747.13	1739.19		44	0.134557	0.122222	0.121212
801.344	748.872	1744.48		45	0.137615	0.125	0.123967
803.797	755.847	1763.01		46	0.140673	0.127778	0.126722
809.712	756.439	1777.27		47	0.143731	0.130556	0.129477
819.835	758.328	1777.69		48	0.146789	0.133333	0.132231
826.128	758.771	1778.57		49	0.149847	0.136111	0.134986
832.718	759.954	1782.7		50	0.152905	0.138889	0.137741
834.544	766.172	1795.45		51	0.155963	0.141667	0.140496
834.63	768.907	1831.38		52	0.159021	0.144444	0.143251
837.994	776.077	1832.51		53	0.16208	0.147222	0.146006
841.396	777.658	1836.04		54	0.165138	0.15	0.14876
844.097	781.693	1845.05		55	0.168196	0.152778	0.151515
846.082	784.455	1853.9		56	0.171254	0.155556	0.15427
846.318	789.695	1864.64		57	0.174312	0.158333	0.157025
847.475	793.312	1874.03		58	0.17737	0.161111	0.15978
856.763	793.927	1875.12		59	0.180428	0.163889	0.162534
858.192	800.333	1875.67		60	0.183486	0.166667	0.165289
860.022	807.539	1878.7		61	0.186544	0.169444	0.168044
868.106	817.522	1884.25		62	0.189602	0.172222	0.170799
873.156	824.961	1889.67		63	0.192661	0.175	0.173554
878.095	836.748	1890.98		64	0.195719	0.177778	0.176309
887.235	841.827	1891.29		65	0.198777	0.180556	0.179063
887.657	846.435	1891.65		66	0.201835	0.183333	0.181818
888.734	853.177	1893.66		67	0.204893	0.186111	0.184573
890.873	853.299	1907.05		68	0.207951	0.188889	0.187328
891.824	858.319	1919.61		69	0.211009	0.191667	0.190083
893.465	860.85	1930.14		70	0.214067	0.194444	0.192837
895.883	883.444	1934.35		71	0.217125	0.197222	0.195592
902.383	889.987	1949.22		72	0.220183	0.2	0.198347
913.15	902.84	1959.48		73	0.223242	0.202778	0.201102
913.157	919.524	1962.96		74	0.2263	0.205556	0.203857
914.494	932.18	1971.22		75	0.229358	0.208333	0.206612
917.688	942.372	1981.08		76	0.232416	0.211111	0.209366
920.735	943.351	2000.22		77	0.235474	0.213889	0.212121
922.203	954.905	2004.71		78	0.238532	0.216667	0.214876
929.991	956.723	2004.91		79	0.24159	0.219444	0.217631
936.376	960.542	2032.06		80	0.244648	0.222222	0.220386
936.426	961.838	2038.31		81	0.247706	0.225	0.22314
936.911	973.439	2042.75		82	0.250765	0.227778	0.225895
937.799	977.161	2053.47		83	0.253823	0.230556	0.22865
942.244	985.455	2056.93		84	0.256881	0.233333	0.231405
943.034	986.803	2061.8		85	0.259939	0.236111	0.23416
943.556	992.839	2064.16		86	0.262997	0.238889	0.236915
947.865	993.36	2071.8		87	0.266055	0.241667	0.239669
957.599	1000.37	2075.64		88	0.269113	0.244444	0.242424
958.459	1001.45	2082.53		89	0.272171	0.247222	0.245179
958.652	1008.43	2088.76		90	0.275229	0.25	0.247934
966.572	1012.37	2088.9		91	0.278287	0.252778	0.250689
973.18	1013	2098.23		92	0.281346	0.255556	0.253444
988.187	1014.06	2100.74		93	0.284404	0.258333	0.256198
988.905	1014.77	2116.18		94	0.287462	0.261111	0.258953
1001.45	1018.03	2128.02		95	0.29052	0.263889	0.261708
1002.76	1018.48	2128.23		96	0.293578	0.266667	0.264463
1005.02	1025.8	2140.08		97	0.296636	0.269444	0.267218
1010.71	1031.56	2146.68		98	0.299694	0.272222	0.269972
1016.76	1033.98	2162.5		99	0.302752	0.275	0.272727
1016.86	1038.14	2163.83		100	0.30581	0.277778	0.275482
1018.71	1041.33	2164.36		101	0.308869	0.280556	0.278237
1019.39	1055.69	2185.31		102	0.311927	0.283333	0.280992
1021.58	1060.51	2193.58		103	0.314985	0.286111	0.283747
1024.71	1061.17	2196.01		104	0.318043	0.288889	0.286501
1030.42	1077.16	2206.9		105	0.321101	0.291667	0.289256
1046.97	1078.96	2207.74		106	0.324159	0.294444	0.292011
1054.08	1083.33	2211.3		107	0.327217	0.297222	0.294766
1055.19	1093.24	2227		108	0.330275	0.3	0.297521
1057.52	1096.92	2228.56		109	0.333333	0.302778	0.300275
1059.93	1101.6	2237.64		110	0.336391	0.305556	0.30303
1063.76	1103.14	2253.71		111	0.33945	0.308333	0.305785
1065.34	1107.92	2260.76		112	0.342508	0.311111	0.30854
1067.14	1125.66	2270.63		113	0.345566	0.313889	0.311295
1068.33	1125.93	2279.25		114	0.348624	0.316667	0.31405
1071.54	1126.48	2279.87		115	0.351682	0.319444	0.316804
1075.72	1128.23	2283.88		116	0.35474	0.322222	0.319559
1076.94	1129.25	2290.4		117	0.357798	0.325	0.322314
1085.19	1137.77	2312.64		118	0.360856	0.327778	0.325069
1090.55	1152.06	2318.3		119	0.363914	0.330556	0.327824
1092.18	1162.52	2329.69		120	0.366972	0.333333	0.330579
1093.02	1174.69	2332.43		121	0.370031	0.336111	0.333333
1094.68	1174.98	2337.1		122	0.373089	0.338889	0.336088
1095.15	1187.68	2338.31		123	0.376147	0.341667	0.338843
1095.45	1188.09	2349.64		124	0.379205	0.344444	0.341598
1095.63	1197.62	2363.47		125	0.382263	0.347222	0.344353
1097.45	1198.97	2364.21		126	0.385321	0.35	0.347107
1097.82	1215.01	2364.27		127	0.388379	0.352778	0.349862
1102.48	1216.06	2391.2		128	0.391437	0.355556	0.352617
1107.24	1228.18	2394.71		129	0.394495	0.358333	0.355372
1108.36	1232.29	2394.97		130	0.397554	0.361111	0.358127
1115.31	1232.8	2405.96		131	0.400612	0.363889	0.360882
1125.27	1237.27	2410.81		132	0.40367	0.366667	0.363636
1130	1237.94	2412.46		133	0.406728	0.369444	0.366391
1142.61	1239.73	2430.92		134	0.409786	0.372222	0.369146
1149.74	1243.15	2437.44		135	0.412844	0.375	0.371901
1154.95	1245.86	2438.75		136	0.415902	0.377778	0.374656
1155.34	1250.75	2442.8		137	0.41896	0.380556	0.37741
1156.22	1251.6	2446.41		138	0.422018	0.383333	0.380165
1157.06	1263.07	2476.36		139	0.425076	0.386111	0.38292
1164.21	1267.33	2484.84		140	0.428135	0.388889	0.385675
1168.42	1272.8	2489.11		141	0.431193	0.391667	0.38843
1176.3	1273.24	2490.83		142	0.434251	0.394444	0.391185
1185.24	1274.04	2492.59		143	0.437309	0.397222	0.393939
1185.53	1276.47	2498.59		144	0.440367	0.4	0.396694
1189.78	1276.83	2506.67		145	0.443425	0.402778	0.399449
1189.87	1277	2539.39		146	0.446483	0.405556	0.402204
1190.98	1280.27	2546.81		147	0.449541	0.408333	0.404959
1192.1	1285.26	2558.7		148	0.452599	0.411111	0.407713
1200.95	1288.18	2568.07		149	0.455657	0.413889	0.410468
1203.84	1290.41	2568.47		150	0.458716	0.416667	0.413223
1208.86	1292.79	2570.55		151	0.461774	0.419444	0.415978
1217.27	1295.7	2579.54		152	0.464832	0.422222	0.418733
1218.06	1300.67	2581.6		153	0.46789	0.425	0.421488
1220.07	1305.35	2596.56		154	0.470948	0.427778	0.424242
1220.54	1306.28	2596.66		155	0.474006	0.430556	0.426997
1221.65	1311.93	2598.19		156	0.477064	0.433333	0.429752
1224.97	1312.81	2603.16		157	0.480122	0.436111	0.432507
1245.89	1313.66	2611.54		158	0.48318	0.438889	0.435262
1252.41	1318.33	2613.45		159	0.486239	0.441667	0.438017
1257.45	1327.43	2613.64		160	0.489297	0.444444	0.440771
1260.33	1327.68	2616.84		161	0.492355	0.447222	0.443526
1263.49	1329.5	2617.35		162	0.495413	0.45	0.446281
1265.4	1333.07	2633.87		163	0.498471	0.452778	0.449036
1274.68	1342.35	2646.2		164	0.501529	0.455556	0.451791
1288.25	1347.13	2651.86		165	0.504587	0.458333	0.454545
1292.28	1347.45	2667.51		166	0.507645	0.461111	0.4573
1293.49	1348.09	2677.43		167	0.510703	0.463889	0.460055
1294.01	1351.76	2682.96		168	0.513761	0.466667	0.46281
1299.58	1352.47	2693.43		169	0.51682	0.469444	0.465565
1301.53	1363.24	2706.44		170	0.519878	0.472222	0.46832
1308.16	1372.78	2715.91		171	0.522936	0.475	0.471074
1311.13	1379.89	2735.6		172	0.525994	0.477778	0.473829
1311.88	1380.25	2738.51		173	0.529052	0.480556	0.476584
1312.87	1381.83	2740.74		174	0.53211	0.483333	0.479339
1318.48	1392.2	2753.35		175	0.535168	0.486111	0.482094
1325.28	1397.11	2763.62		176	0.538226	0.488889	0.484848
1331.58	1397.76	2770.4		177	0.541284	0.491667	0.487603
1338	1404.2	2773.34		178	0.544343	0.494444	0.490358
1340.25	1404.46	2774.5		179	0.547401	0.497222	0.493113
1341.9	1408.94	2776.29		180	0.550459	0.5	0.495868
1346.12	1411.03	2779.32		181	0.553517	0.502778	0.498623
1349.55	1415.76	2779.95		182	0.556575	0.505556	0.501377
1355.84	1419.41	2788.77		183	0.559633	0.508333	0.504132
1372.1	1422.86	2804.01		184	0.562691	0.511111	0.506887
1382.69	1424.05	2823.28		185	0.565749	0.513889	0.509642
1382.81	1424.35	2824.45		186	0.568807	0.516667	0.512397
1384.11	1440.43	2828.35		187	0.571865	0.519444	0.515152
1384.64	1440.96	2829.68		188	0.574924	0.522222	0.517906
1398.56	1458.54	2840.18		189	0.577982	0.525	0.520661
1399.79	1459.06	2843.07		190	0.58104	0.527778	0.523416
1402.66	1459.45	2846.86		191	0.584098	0.530556	0.526171
1402.84	1476.03	2855.19		192	0.587156	0.533333	0.528926
1404.99	1481.07	2870.2		193	0.590214	0.536111	0.53168
1408.34	1482.5	2876.5		194	0.593272	0.538889	0.534435
1409.31	1489.37	2892.73		195	0.59633	0.541667	0.53719
1414.53	1492.68	2897.79		196	0.599388	0.544444	0.539945
1416.91	1494.44	2908.75		197	0.602446	0.547222	0.5427
1417.16	1495.61	2918.33		198	0.605505	0.55	0.545455
1423.28	1499.76	2923.88		199	0.608563	0.552778	0.548209
1438.76	1507.86	2927.35		200	0.611621	0.555556	0.550964
1444.09	1508.37	2934.53		201	0.614679	0.558333	0.553719
1448.86	1519.08	2935.72		202	0.617737	0.561111	0.556474
1451.93	1519.7	2947.24		203	0.620795	0.563889	0.559229
1460.16	1545.63	2954.31		204	0.623853	0.566667	0.561983
1462.05	1547.63	2967.14		205	0.626911	0.569444	0.564738
1463.68	1562.95	2967.9		206	0.629969	0.572222	0.567493
1473.99	1567.09	2980.52		207	0.633028	0.575	0.570248
1475.1	1576.31	2988.56		208	0.636086	0.577778	0.573003
1478.92	1579.75	2991.04		209	0.639144	0.580556	0.575758
1479.07	1579.98	2998.73		210	0.642202	0.583333	0.578512
1490.88	1595.06	3031.94		211	0.64526	0.586111	0.581267
1491.56	1608.93	3034.21		212	0.648318	0.588889	0.584022
1493.61	1609.94	3041.29		213	0.651376	0.591667	0.586777
1494.48	1611.43	3056.47		214	0.654434	0.594444	0.589532
1502.04	1611.64	3056.82		215	0.657492	0.597222	0.592287
1507.57	1612.62	3059.24		216	0.66055	0.6	0.595041
1518.45	1612.95	3072.15		217	0.663609	0.602778	0.597796
1523.08	1626.72	3083.7		218	0.666667	0.605556	0.600551
1528.28	1628.8	3103.64		219	0.669725	0.608333	0.603306
1529.35	1629.27	3110.51		220	0.672783	0.611111	0.606061
1539.95	1632.66	3124.34		221	0.675841	0.613889	0.608815
1544.88	1639.28	3125.12		222	0.678899	0.616667	0.61157
1555.69	1640.17	3128.41		223	0.681957	0.619444	0.614325
1557.99	1649.1	3128.64		224	0.685015	0.622222	0.61708
1561.65	1664.46	3140.87		225	0.688073	0.625	0.619835
1570.33	1674.54	3159.54		226	0.691131	0.627778	0.62259
1571.49	1677.94	3161.09		227	0.69419	0.630556	0.625344
1574.39	1679.48	3189.13		228	0.697248	0.633333	0.628099
1579.87	1683.41	3189.8		229	0.700306	0.636111	0.630854
1581.32	1691.59	3197.53		230	0.703364	0.638889	0.633609
1590	1695.35	3200.41		231	0.706422	0.641667	0.636364
1593.88	1705.27	3212.59		232	0.70948	0.644444	0.639118
1598.73	1714.17	3216.22		233	0.712538	0.647222	0.641873
1599.11	1715.19	3227.95		234	0.715596	0.65	0.644628
1604.51	1720.69	3231.91		235	0.718654	0.652778	0.647383
1606.42	1725.34	3246.76		236	0.721713	0.655556	0.650138
1608.83	1726.88	3264.35		237	0.724771	0.658333	0.652893
1625.34	1728.52	3265.35		238	0.727829	0.661111	0.655647
1631.75	1734.28	3292.64		239	0.730887	0.663889	0.658402
1631.85	1749.58	3300.88		240	0.733945	0.666667	0.661157
1635.11	1751.13	3306.47		241	0.737003	0.669444	0.663912
1648.26	1751.42	3310.71		242	0.740061	0.672222	0.666667
1654.14	1753.96	3318.61		243	0.743119	0.675	0.669421
1654.2	1761.48	3325.17		244	0.746177	0.677778	0.672176
1658.31	1765.36	3341.56		245	0.749235	0.680556	0.674931
1661.8	1767.52	3341.62		246	0.752294	0.683333	0.677686
1667.24	1773.92	3343.83		247	0.755352	0.686111	0.680441
1683.36	1792.71	3359.54		248	0.75841	0.688889	0.683196
1687.54	1793	3367.76		249	0.761468	0.691667	0.68595
1707.59	1800.21	3371.63		250	0.764526	0.694444	0.688705
1707.9	1808.99	3379		251	0.767584	0.697222	0.69146
1713.09	1810.95	3393.33		252	0.770642	0.7	0.694215
1715.68	1811.91	3393.82		253	0.7737	0.702778	0.69697
1752.52	1818.49	3439.21		254	0.776758	0.705556	0.699725
1755.33	1843.91	3443.49		255	0.779817	0.708333	0.702479
1778	1864.3	3444.88		256	0.782875	0.711111	0.705234
1778.24	1886.9	3466.68		257	0.785933	0.713889	0.707989
1782.36	1888.79	3467.88		258	0.788991	0.716667	0.710744
1782.81	1889.31	3477.55		259	0.792049	0.719444	0.713499
1815.33	1890.22	3491.08		260	0.795107	0.722222	0.716253
1818.88	1890.48	3493.85		261	0.798165	0.725	0.719008
1820.54	1895.11	3522.99		262	0.801223	0.727778	0.721763
1831.86	1901.64	3530.83		263	0.804281	0.730556	0.724518
1832.49	1916.92	3548.04		264	0.807339	0.733333	0.727273
1836.44	1921.15	3548.8		265	0.810398	0.736111	0.730028
1841.11	1923.55	3576.2		266	0.813456	0.738889	0.732782
1846.73	1924.97	3578.49		267	0.816514	0.741667	0.735537
1855.45	1931.44	3612.81		268	0.819572	0.744444	0.738292
1862.16	1935.47	3615.03		269	0.82263	0.747222	0.741047
1863.54	1943.01	3624.54		270	0.825688	0.75	0.743802
1877.81	1951.78	3625.27		271	0.828746	0.752778	0.746556
1897.64	1952.79	3636.23		272	0.831804	0.755556	0.749311
1908.12	1953.1	3654.05		273	0.834862	0.758333	0.752066
1908.54	1972.36	3674.39		274	0.83792	0.761111	0.754821
1913.49	1986.31	3690.31		275	0.840979	0.763889	0.757576
1918.22	2006.81	3692.24		276	0.844037	0.766667	0.760331
1931.35	2019.67	3711.27		277	0.847095	0.769444	0.763085
1942.26	2029.94	3713.86		278	0.850153	0.772222	0.76584
1956.13	2031.44	3714.91		279	0.853211	0.775	0.768595
1974.49	2035.14	3747.61		280	0.856269	0.777778	0.77135
1992.95	2048.44	3766.66		281	0.859327	0.780556	0.774105
2018.8	2055.73	3783.39		282	0.862385	0.783333	0.77686
2049.33	2060.58	3785.38		283	0.865443	0.786111	0.779614
2060.66	2065.11	3799.55		284	0.868502	0.788889	0.782369
2062.46	2066.29	3800.58		285	0.87156	0.791667	0.785124
2069.28	2079.25	3837.31		286	0.874618	0.794444	0.787879
2071.86	2080.2	3843.83		287	0.877676	0.797222	0.790634
2079.4	2081.74	3861		288	0.880734	0.8	0.793388
2079.76	2092.69	3863.35		289	0.883792	0.802778	0.796143
2083.11	2099.73	3867.87		290	0.88685	0.805556	0.798898
2084.92	2118.03	3873.46		291	0.889908	0.808333	0.801653
2090.2	2130.65	3877.83		292	0.892966	0.811111	0.804408
2114.89	2137.77	3878.4		293	0.896024	0.813889	0.807163
2119.65	2150.82	3882.89		294	0.899083	0.816667	0.809917
2139	2173.61	3887.91		295	0.902141	0.819444	0.812672
2150.47	2184.69	3892.1		296	0.905199	0.822222	0.815427
2155.6	2224.59	3907.16		297	0.908257	0.825	0.818182
2161.35	2251.46	3909.49		298	0.911315	0.827778	0.820937
2165.09	2272.3	3952.04		299	0.914373	0.830556	0.823691
2175.94	2277.87	3976.67		300	0.917431	0.833333	0.826446
2219.44	2286.41	3984.14		301	0.920489	0.836111	0.829201
2226.23	2303.34	3998.01		302	0.923547	0.838889	0.831956
2238.9	2307.46	4004.68		303	0.926606	0.841667	0.834711
2246.63	2319.48	4038.05		304	0.929664	0.844444	0.837466
2257.23	2329.46	4041.23		305	0.932722	0.847222	0.84022
2275.16	2349.26	4053.17		306	0.93578	0.85	0.842975
2321.41	2360.85	4058.74		307	0.938838	0.852778	0.84573
2445.25	2384.49	4063.68		308	0.941896	0.855556	0.848485
2446.46	2428.57	4110.95		309	0.944954	0.858333	0.85124
2447.53	2480.85	4146.07		310	0.948012	0.861111	0.853994
2449.42	2481.81	4163.76		311	0.95107	0.863889	0.856749
2455.55	2497.45	4183.47		312	0.954128	0.866667	0.859504
2460.82	2511.83	4184.28		313	0.957187	0.869444	0.862259
2538.07	2520.02	4197.34		314	0.960245	0.872222	0.865014
2560.87	2529.39	4208.95		315	0.963303	0.875	0.867769
2589.72	2533.06	4266.22		316	0.966361	0.877778	0.870523
2595.83	2552.17	4286.3		317	0.969419	0.880556	0.873278
2628.81	2556.03	4297.02		318	0.972477	0.883333	0.876033
2723.44	2565.92	4303.99		319	0.975535	0.886111	0.878788
2735.3	2582.93	4304.62		320	0.978593	0.888889	0.881543
2820.93	2610.74	4324.73		321	0.981651	0.891667	0.884298
3037.97	2649.51	4342.85		322	0.984709	0.894444	0.887052
3279.52	2655.42	4373.68		323	0.987768	0.897222	0.889807
3326.17	2663.82	4409.84		324	0.990826	0.9	0.892562
3493.45	2696.67	4421.98		325	0.993884	0.902778	0.895317
3518.62	2697.01	4474.54		326	0.996942	0.905556	0.898072
4350.44	2703.41	4632.57		327	1	0.908333	0.900826
	2703.83	4634.67		328		0.911111	0.903581
	2742.25	4718.47		329		0.913889	0.906336
	2787.03	4828.32		330		0.916667	0.909091
	2817.4	4834.79		331		0.919444	0.911846
	2820.3	4895.92		332		0.922222	0.914601
	2822.52	4941.8		333		0.925	0.917355
	2824.43	4964.06		334		0.927778	0.92011
	2867.37	5037.29		335		0.930556	0.922865
	2886.52	5091.38		336		0.933333	0.92562
	2907.25	5095.88		337		0.936111	0.928375
	2967.34	5109.88		338		0.938889	0.931129
	2985.72	5207.22		339		0.941667	0.933884
	3028.22	5316.37		340		0.944444	0.936639
	3037.06	5352.47		341		0.947222	0.939394
	3054	5366.83		342		0.95	0.942149
	3071.5	5490.58		343		0.952778	0.944904
	3080.64	5509.76		344		0.955556	0.947658
	3150.53	5517.23		345		0.958333	0.950413
	3166.66	5636.04		346		0.961111	0.953168
	3225.19	5765.16		347		0.963889	0.955923
	3241.85	5945.3		348		0.966667	0.958678
	3286.41	5979.28		349		0.969444	0.961433
	3356.78	5996.34		350		0.972222	0.964187
	3496.64	6063.49		351		0.975	0.966942
	3514.18	6101.67		352		0.977778	0.969697
	3674.6	6377.16		353		0.980556	0.972452
	3856.65	6479.79		354		0.983333	0.975207
	4068.65	6498.7		355		0.986111	0.977961
	4148.67	6745.02		356		0.988889	0.980716
	4177.47	6881.66		357		0.991667	0.983471
	4853.45	7353.78		358		0.994444	0.986226
	4955.88	7525.34		359		0.997222	0.988981
	5351.9	7721.56		360		1	0.991736
		7725.67		361			0.99449
		7776.59		362			0.997245
		9262.64		363			1

## Sheet: Fig 5E
K144Q K234Q
20	70	0 Ca			Cum. Prob. 20	Cum. Prob. 70	Cum. Prob. 0 Ca
483.86	405.785	948.758		1	0.002	0.00250627	0.00156006
494.915	875.532	1267.9		2	0.004	0.00501253	0.00312012
563.997	925.387	1293.84		3	0.006	0.0075188	0.00468019
576.642	927.908	1467.76		4	0.008	0.0100251	0.00624025
640.405	973.58	1553.99		5	0.01	0.0125313	0.00780031
645.247	1071.51	1612.85		6	0.012	0.0150376	0.00936037
670.159	1114.14	1621.88		7	0.014	0.0175439	0.0109204
714.823	1143.28	1660.51		8	0.016	0.0200501	0.0124805
781.373	1155.6	1804.95		9	0.018	0.0225564	0.0140406
794.008	1250.9	1818.27		10	0.02	0.0250627	0.0156006
806.011	1272.05	1822.17		11	0.022	0.0275689	0.0171607
806.613	1301.77	1853.37		12	0.024	0.0300752	0.0187207
819.527	1375.17	1857.79		13	0.026	0.0325815	0.0202808
829.493	1380.5	1923.95		14	0.028	0.0350877	0.0218409
836.278	1398.97	1951.87		15	0.03	0.037594	0.0234009
842.302	1424.87	1996.36		16	0.032	0.0401003	0.024961
847.113	1431.02	2001.49		17	0.034	0.0426065	0.0265211
880.442	1437.51	2089.28		18	0.036	0.0451128	0.0280811
881.386	1476.3	2109.63		19	0.038	0.047619	0.0296412
894.541	1487.84	2114.9		20	0.04	0.0501253	0.0312012
898.648	1502.73	2118.37		21	0.042	0.0526316	0.0327613
938.349	1513.27	2136.57		22	0.044	0.0551378	0.0343214
946.356	1518.78	2136.94		23	0.046	0.0576441	0.0358814
952.958	1520.98	2149.52		24	0.048	0.0601504	0.0374415
957.379	1532.29	2158.73		25	0.05	0.0626566	0.0390016
1000.17	1559.5	2222.39		26	0.052	0.0651629	0.0405616
1008.83	1570.59	2234.75		27	0.054	0.0676692	0.0421217
1012.88	1599.22	2241.75		28	0.056	0.0701754	0.0436817
1016.25	1608.32	2250.97		29	0.058	0.0726817	0.0452418
1036.09	1637.49	2263.94		30	0.06	0.075188	0.0468019
1047.78	1644.75	2266.11		31	0.062	0.0776942	0.0483619
1051.52	1664.99	2292.58		32	0.064	0.0802005	0.049922
1063.42	1665.31	2293.62		33	0.066	0.0827068	0.0514821
1068.79	1671.93	2333.95		34	0.068	0.085213	0.0530421
1072.89	1723.78	2367.84		35	0.07	0.0877193	0.0546022
1077.3	1723.98	2370.96		36	0.072	0.0902256	0.0561622
1084.95	1733.37	2384.43		37	0.074	0.0927318	0.0577223
1086.78	1756.24	2390.75		38	0.076	0.0952381	0.0592824
1099.8	1801.82	2391.98		39	0.078	0.0977444	0.0608424
1103.95	1828.85	2403.49		40	0.08	0.100251	0.0624025
1113.64	1829.4	2411.84		41	0.082	0.102757	0.0639626
1119.79	1833.32	2431.54		42	0.084	0.105263	0.0655226
1127.44	1857.05	2482.46		43	0.086	0.107769	0.0670827
1127.83	1876.74	2494.2		44	0.088	0.110276	0.0686427
1141.61	1893.61	2508.99		45	0.09	0.112782	0.0702028
1165.09	1901.44	2520.28		46	0.092	0.115288	0.0717629
1189.64	1937.38	2525.03		47	0.094	0.117794	0.0733229
1202.4	1939.76	2532.31		48	0.096	0.120301	0.074883
1208.89	1955.01	2548.49		49	0.098	0.122807	0.0764431
1209.29	1956.35	2554.11		50	0.1	0.125313	0.0780031
1213.92	1978.14	2556.17		51	0.102	0.12782	0.0795632
1216.31	1980.6	2578.56		52	0.104	0.130326	0.0811232
1222.72	1988.65	2584.38		53	0.106	0.132832	0.0826833
1242.63	1989.7	2594.62		54	0.108	0.135338	0.0842434
1248.98	1997.01	2603.24		55	0.11	0.137845	0.0858034
1252.34	2006.79	2613.62		56	0.112	0.140351	0.0873635
1274.36	2017.63	2618.72		57	0.114	0.142857	0.0889236
1277.39	2020.44	2625.94		58	0.116	0.145363	0.0904836
1279.94	2033.41	2636.88		59	0.118	0.14787	0.0920437
1280.96	2046.7	2654.45		60	0.12	0.150376	0.0936037
1292.59	2048.68	2666.58		61	0.122	0.152882	0.0951638
1293.22	2060.97	2685.28		62	0.124	0.155388	0.0967239
1299.49	2062.78	2693.91		63	0.126	0.157895	0.0982839
1316.34	2069.68	2698.3		64	0.128	0.160401	0.099844
1318.13	2073.21	2702.69		65	0.13	0.162907	0.101404
1323.12	2092.14	2704.7		66	0.132	0.165414	0.102964
1327.34	2112.94	2719.26		67	0.134	0.16792	0.104524
1332.47	2136	2760.14		68	0.136	0.170426	0.106084
1339.29	2149.98	2794.95		69	0.138	0.172932	0.107644
1353.87	2151.73	2799.55		70	0.14	0.175439	0.109204
1354.19	2156.39	2802.86		71	0.142	0.177945	0.110764
1382.1	2168	2815.37		72	0.144	0.180451	0.112324
1382.63	2169.49	2821.5		73	0.146	0.182957	0.113885
1406.83	2173.99	2821.55		74	0.148	0.185464	0.115445
1407.89	2180.92	2822.84		75	0.15	0.18797	0.117005
1411.08	2181.68	2832.37		76	0.152	0.190476	0.118565
1415.74	2200.34	2837.43		77	0.154	0.192982	0.120125
1418.73	2201.03	2850.51		78	0.156	0.195489	0.121685
1429.08	2204.49	2850.6		79	0.158	0.197995	0.123245
1435.34	2216.02	2854.67		80	0.16	0.200501	0.124805
1445.75	2246.85	2859.14		81	0.162	0.203008	0.126365
1451.64	2302.66	2866.39		82	0.164	0.205514	0.127925
1485.63	2320.72	2869.52		83	0.166	0.20802	0.129485
1490.84	2322.98	2877.07		84	0.168	0.210526	0.131045
1497.24	2324.19	2883.19		85	0.17	0.213033	0.132605
1506.87	2326.38	2892.3		86	0.172	0.215539	0.134165
1511.68	2347.51	2898.56		87	0.174	0.218045	0.135725
1528.31	2347.88	2903.44		88	0.176	0.220551	0.137285
1530.68	2352.3	2908.2		89	0.178	0.223058	0.138846
1553.29	2362.57	2911.75		90	0.18	0.225564	0.140406
1564.49	2376.13	2920.44		91	0.182	0.22807	0.141966
1585.72	2376.19	2921.58		92	0.184	0.230576	0.143526
1592.72	2377.82	2931.36		93	0.186	0.233083	0.145086
1614.09	2378.94	2942.03		94	0.188	0.235589	0.146646
1623.85	2392.64	2942.59		95	0.19	0.238095	0.148206
1635.28	2401.3	2948.82		96	0.192	0.240602	0.149766
1652.01	2404.19	2955.26		97	0.194	0.243108	0.151326
1658	2404.43	2957.13		98	0.196	0.245614	0.152886
1660.71	2408.26	2957.24		99	0.198	0.24812	0.154446
1667.97	2411.45	2958.71		100	0.2	0.250627	0.156006
1675.03	2425.03	2963.59		101	0.202	0.253133	0.157566
1683.03	2436.91	2966.11		102	0.204	0.255639	0.159126
1695.77	2453.41	2975.97		103	0.206	0.258145	0.160686
1701.31	2453.84	2977.26		104	0.208	0.260652	0.162246
1711.46	2466.14	2983.14		105	0.21	0.263158	0.163807
1711.82	2469.04	2984.02		106	0.212	0.265664	0.165367
1712.91	2470.69	2996.18		107	0.214	0.26817	0.166927
1715.53	2480.28	3007.39		108	0.216	0.270677	0.168487
1723.55	2489.03	3008.27		109	0.218	0.273183	0.170047
1723.93	2495.23	3010.95		110	0.22	0.275689	0.171607
1748.86	2496.16	3014.72		111	0.222	0.278195	0.173167
1755.1	2497.95	3015.72		112	0.224	0.280702	0.174727
1758.43	2498.48	3045.99		113	0.226	0.283208	0.176287
1768.81	2502.34	3050.86		114	0.228	0.285714	0.177847
1771.42	2503.02	3053.08		115	0.23	0.288221	0.179407
1776.13	2504.67	3054.72		116	0.232	0.290727	0.180967
1783.64	2505.12	3062.58		117	0.234	0.293233	0.182527
1787.26	2514.77	3065.38		118	0.236	0.295739	0.184087
1789.38	2528.03	3065.53		119	0.238	0.298246	0.185647
1792.09	2528.31	3071.99		120	0.24	0.300752	0.187207
1794.97	2531.45	3074.28		121	0.242	0.303258	0.188768
1802.1	2553.61	3081.89		122	0.244	0.305764	0.190328
1802.81	2560.62	3084.12		123	0.246	0.308271	0.191888
1815.31	2562.95	3091.26		124	0.248	0.310777	0.193448
1823.82	2566.58	3093.16		125	0.25	0.313283	0.195008
1827.83	2571.53	3099.48		126	0.252	0.315789	0.196568
1831.77	2572.92	3103.37		127	0.254	0.318296	0.198128
1845.99	2578.28	3114		128	0.256	0.320802	0.199688
1853.45	2585.75	3119.25		129	0.258	0.323308	0.201248
1858.78	2595.04	3122.32		130	0.26	0.325815	0.202808
1869.3	2595.42	3125.52		131	0.262	0.328321	0.204368
1870.03	2599.29	3135.55		132	0.264	0.330827	0.205928
1870.45	2600.63	3136.37		133	0.266	0.333333	0.207488
1876.59	2607.61	3154.93		134	0.268	0.33584	0.209048
1880.59	2608.85	3155.84		135	0.27	0.338346	0.210608
1904.88	2610.96	3155.85		136	0.272	0.340852	0.212168
1910.03	2614.57	3166.72		137	0.274	0.343358	0.213729
1913.88	2616.41	3167.79		138	0.276	0.345865	0.215289
1917.63	2619.35	3169.09		139	0.278	0.348371	0.216849
1920.95	2623.25	3186.02		140	0.28	0.350877	0.218409
1924.22	2645.92	3195.21		141	0.282	0.353383	0.219969
1924.54	2653.28	3197.15		142	0.284	0.35589	0.221529
1925	2665.92	3206.02		143	0.286	0.358396	0.223089
1926.35	2669.87	3206.36		144	0.288	0.360902	0.224649
1933.46	2675.56	3214.03		145	0.29	0.363409	0.226209
1948.07	2676.94	3216.99		146	0.292	0.365915	0.227769
1948.46	2677.61	3219.91		147	0.294	0.368421	0.229329
1951.32	2678.7	3222.49		148	0.296	0.370927	0.230889
1953.72	2682.93	3224.23		149	0.298	0.373434	0.232449
1954.28	2684.26	3228.83		150	0.3	0.37594	0.234009
1967.73	2684.85	3234.37		151	0.302	0.378446	0.235569
1973.76	2692.07	3243.42		152	0.304	0.380952	0.237129
1984.33	2694.66	3244.89		153	0.306	0.383459	0.23869
1984.82	2698.36	3250.62		154	0.308	0.385965	0.24025
1987.86	2706.09	3256.05		155	0.31	0.388471	0.24181
1992.32	2712.53	3259.25		156	0.312	0.390977	0.24337
1994.92	2723.74	3264.65		157	0.314	0.393484	0.24493
1995.58	2736.07	3269.6		158	0.316	0.39599	0.24649
2002.37	2740.04	3274.01		159	0.318	0.398496	0.24805
2017.42	2756.86	3276.65		160	0.32	0.401003	0.24961
2020.27	2758.17	3279.51		161	0.322	0.403509	0.25117
2033.7	2781.49	3287.01		162	0.324	0.406015	0.25273
2040.92	2782.9	3288.53		163	0.326	0.408521	0.25429
2041.42	2799.97	3290.03		164	0.328	0.411028	0.25585
2043.72	2810.58	3291.08		165	0.33	0.413534	0.25741
2043.96	2821.93	3292.49		166	0.332	0.41604	0.25897
2046.93	2823.87	3307.55		167	0.334	0.418546	0.26053
2049.22	2827.67	3315.4		168	0.336	0.421053	0.26209
2049.89	2830.34	3323.14		169	0.338	0.423559	0.263651
2052.02	2833.63	3324.82		170	0.34	0.426065	0.265211
2053.94	2843.37	3327.18		171	0.342	0.428571	0.266771
2061.23	2846.17	3330.03		172	0.344	0.431078	0.268331
2076.33	2849.02	3337.51		173	0.346	0.433584	0.269891
2084.78	2852.84	3337.84		174	0.348	0.43609	0.271451
2100.44	2855.28	3338.65		175	0.35	0.438596	0.273011
2104.81	2859.83	3339.72		176	0.352	0.441103	0.274571
2112.25	2861.2	3342.03		177	0.354	0.443609	0.276131
2122.64	2868.24	3345.34		178	0.356	0.446115	0.277691
2127.19	2869.94	3347.19		179	0.358	0.448622	0.279251
2127.63	2870.94	3355.77		180	0.36	0.451128	0.280811
2136.27	2879.22	3358.46		181	0.362	0.453634	0.282371
2139.25	2882.12	3358.69		182	0.364	0.45614	0.283931
2144.72	2884.06	3360.51		183	0.366	0.458647	0.285491
2145.86	2884.99	3361.99		184	0.368	0.461153	0.287051
2150.34	2889.38	3363.31		185	0.37	0.463659	0.288612
2156.26	2889.45	3368.45		186	0.372	0.466165	0.290172
2159.22	2890.99	3380.89		187	0.374	0.468672	0.291732
2160.84	2899.68	3381.04		188	0.376	0.471178	0.293292
2176.24	2924.39	3383.5		189	0.378	0.473684	0.294852
2183.25	2924.57	3387.29		190	0.38	0.47619	0.296412
2187.2	2928	3388.14		191	0.382	0.478697	0.297972
2187.54	2932.66	3395.85		192	0.384	0.481203	0.299532
2193.02	2932.81	3398.51		193	0.386	0.483709	0.301092
2197.55	2937.06	3399.44		194	0.388	0.486216	0.302652
2202.35	2941.13	3416.95		195	0.39	0.488722	0.304212
2222.83	2942.07	3417.3		196	0.392	0.491228	0.305772
2228.83	2949.73	3418.91		197	0.394	0.493734	0.307332
2232.86	2951.63	3420.52		198	0.396	0.496241	0.308892
2232.91	2957.78	3421.54		199	0.398	0.498747	0.310452
2241.55	2961.44	3421.84		200	0.4	0.501253	0.312012
2246.07	2962.41	3426.71		201	0.402	0.503759	0.313573
2257.79	2967.58	3433.83		202	0.404	0.506266	0.315133
2259.71	2971.81	3434.74		203	0.406	0.508772	0.316693
2259.95	2971.83	3436.49		204	0.408	0.511278	0.318253
2260.48	2972.98	3439.32		205	0.41	0.513784	0.319813
2279.19	2973.45	3443.61		206	0.412	0.516291	0.321373
2280.14	2976.81	3454.29		207	0.414	0.518797	0.322933
2280.32	2980.56	3459.18		208	0.416	0.521303	0.324493
2283.1	2986.93	3462.72		209	0.418	0.52381	0.326053
2284.98	2994.03	3463.6		210	0.42	0.526316	0.327613
2285.86	3004.09	3465.18		211	0.422	0.528822	0.329173
2287.08	3009.25	3469.57		212	0.424	0.531328	0.330733
2289.53	3010.12	3472.67		213	0.426	0.533835	0.332293
2292.3	3035.29	3480.03		214	0.428	0.536341	0.333853
2292.72	3035.96	3488.71		215	0.43	0.538847	0.335413
2293.16	3038.79	3495.99		216	0.432	0.541353	0.336973
2297.67	3039.54	3496.14		217	0.434	0.54386	0.338534
2299.65	3065.39	3501.05		218	0.436	0.546366	0.340094
2299.78	3072.24	3505.29		219	0.438	0.548872	0.341654
2301.01	3073.58	3511.26		220	0.44	0.551378	0.343214
2303.69	3081.07	3513.28		221	0.442	0.553885	0.344774
2308.14	3082.07	3518.43		222	0.444	0.556391	0.346334
2309.52	3089.86	3526.53		223	0.446	0.558897	0.347894
2312.67	3090.73	3530.07		224	0.448	0.561404	0.349454
2313.68	3105.69	3532.97		225	0.45	0.56391	0.351014
2326.46	3119.93	3536.28		226	0.452	0.566416	0.352574
2327.36	3127.97	3543.99		227	0.454	0.568922	0.354134
2327.77	3136.99	3545.43		228	0.456	0.571429	0.355694
2329.78	3139.34	3549.65		229	0.458	0.573935	0.357254
2330.51	3140.09	3550		230	0.46	0.576441	0.358814
2330.91	3140.72	3554.62		231	0.462	0.578947	0.360374
2338.99	3155.12	3557.89		232	0.464	0.581454	0.361934
2343.07	3156.56	3559.2		233	0.466	0.58396	0.363495
2357.44	3158.53	3560.29		234	0.468	0.586466	0.365055
2360.28	3159.82	3561.23		235	0.47	0.588972	0.366615
2367.04	3164.91	3572.87		236	0.472	0.591479	0.368175
2368.12	3165.97	3579.66		237	0.474	0.593985	0.369735
2369.34	3168.61	3580.93		238	0.476	0.596491	0.371295
2373.31	3176.86	3589.13		239	0.478	0.598997	0.372855
2381.04	3179.01	3589.27		240	0.48	0.601504	0.374415
2383.28	3182.14	3593.48		241	0.482	0.60401	0.375975
2386.13	3184.96	3598.57		242	0.484	0.606516	0.377535
2395.55	3186.02	3605.64		243	0.486	0.609023	0.379095
2401.95	3194.16	3606.03		244	0.488	0.611529	0.380655
2403.74	3205.75	3611.16		245	0.49	0.614035	0.382215
2404.8	3207.88	3626.72		246	0.492	0.616541	0.383775
2425	3209.39	3628.86		247	0.494	0.619048	0.385335
2426.27	3215.23	3640.91		248	0.496	0.621554	0.386895
2428.32	3219.02	3642.81		249	0.498	0.62406	0.388456
2429.79	3254.15	3643.18		250	0.5	0.626566	0.390016
2436.76	3254.81	3644.59		251	0.502	0.629073	0.391576
2449.1	3267.62	3644.83		252	0.504	0.631579	0.393136
2453.85	3269.42	3645.14		253	0.506	0.634085	0.394696
2456.35	3283.55	3650.37		254	0.508	0.636591	0.396256
2458.62	3295.81	3653.47		255	0.51	0.639098	0.397816
2462.82	3297.63	3653.79		256	0.512	0.641604	0.399376
2464.77	3314.91	3655.53		257	0.514	0.64411	0.400936
2469.11	3317.63	3680.32		258	0.516	0.646617	0.402496
2472.21	3321.4	3684.76		259	0.518	0.649123	0.404056
2472.77	3335.98	3688.18		260	0.52	0.651629	0.405616
2485.26	3351.28	3693.93		261	0.522	0.654135	0.407176
2493.7	3360.31	3699.37		262	0.524	0.656642	0.408736
2506.42	3362.49	3704.07		263	0.526	0.659148	0.410296
2510.1	3363.69	3704.45		264	0.528	0.661654	0.411856
2512.07	3364.77	3712.98		265	0.53	0.66416	0.413417
2517.68	3370.37	3716.3		266	0.532	0.666667	0.414977
2518.9	3375.02	3716.66		267	0.534	0.669173	0.416537
2522.13	3382.95	3729.12		268	0.536	0.671679	0.418097
2528.31	3388.47	3731.22		269	0.538	0.674185	0.419657
2539	3392.56	3745.31		270	0.54	0.676692	0.421217
2552.43	3396.01	3752.12		271	0.542	0.679198	0.422777
2552.8	3399.62	3756		272	0.544	0.681704	0.424337
2569.34	3403.35	3766.28		273	0.546	0.684211	0.425897
2590.19	3403.86	3769.36		274	0.548	0.686717	0.427457
2592.99	3407.63	3774.11		275	0.55	0.689223	0.429017
2593.47	3408.8	3785.34		276	0.552	0.691729	0.430577
2599.48	3409.69	3788.62		277	0.554	0.694236	0.432137
2605.92	3415.64	3792.47		278	0.556	0.696742	0.433697
2609.74	3416.13	3795.71		279	0.558	0.699248	0.435257
2610.61	3420.65	3797.38		280	0.56	0.701754	0.436817
2624.31	3424.86	3801.38		281	0.562	0.704261	0.438378
2637.89	3425.18	3806.64		282	0.564	0.706767	0.439938
2639.92	3428.67	3815.97		283	0.566	0.709273	0.441498
2641.4	3440.03	3817.8		284	0.568	0.711779	0.443058
2644.32	3445.8	3819.47		285	0.57	0.714286	0.444618
2657.75	3449.53	3822.15		286	0.572	0.716792	0.446178
2664.57	3452.88	3824.55		287	0.574	0.719298	0.447738
2673.14	3462.24	3825.9		288	0.576	0.721805	0.449298
2679.32	3468.03	3829.59		289	0.578	0.724311	0.450858
2682.07	3468.78	3841.49		290	0.58	0.726817	0.452418
2685.71	3469.22	3848.16		291	0.582	0.729323	0.453978
2686.88	3470.02	3849.39		292	0.584	0.73183	0.455538
2699	3482.47	3849.86		293	0.586	0.734336	0.457098
2706.11	3483.07	3852.18		294	0.588	0.736842	0.458658
2710.17	3490.11	3852.19		295	0.59	0.739348	0.460218
2723.07	3492.5	3862.13		296	0.592	0.741855	0.461778
2723.36	3494.33	3864.37		297	0.594	0.744361	0.463339
2726.26	3498.62	3872.01		298	0.596	0.746867	0.464899
2733.74	3499.27	3872.81		299	0.598	0.749373	0.466459
2737.21	3499.27	3875.96		300	0.6	0.75188	0.468019
2747.38	3501.69	3886.46		301	0.602	0.754386	0.469579
2747.48	3524.77	3886.56		302	0.604	0.756892	0.471139
2747.78	3529.32	3889.12		303	0.606	0.759398	0.472699
2764.06	3533.25	3893.16		304	0.608	0.761905	0.474259
2777.47	3540.54	3894.15		305	0.61	0.764411	0.475819
2804.74	3541.9	3900.36		306	0.612	0.766917	0.477379
2811.77	3545.86	3908.63		307	0.614	0.769424	0.478939
2815.7	3567.76	3916.2		308	0.616	0.77193	0.480499
2819.2	3571.45	3921.02		309	0.618	0.774436	0.482059
2824.41	3602.08	3923.89		310	0.62	0.776942	0.483619
2828.56	3604.75	3926.06		311	0.622	0.779449	0.485179
2844.94	3605.88	3937		312	0.624	0.781955	0.486739
2845.08	3635.57	3938.02		313	0.626	0.784461	0.4883
2845.19	3639.7	3942.53		314	0.628	0.786967	0.48986
2852.94	3640.16	3948.7		315	0.63	0.789474	0.49142
2871.74	3646.79	3948.9		316	0.632	0.79198	0.49298
2871.87	3667.07	3967.01		317	0.634	0.794486	0.49454
2873.46	3699.19	3970.83		318	0.636	0.796992	0.4961
2887.76	3700.52	3973.4		319	0.638	0.799499	0.49766
2888.18	3711.62	3973.88		320	0.64	0.802005	0.49922
2893.66	3719.6	3979.54		321	0.642	0.804511	0.50078
2902.08	3738.27	3990.62		322	0.644	0.807018	0.50234
2906.11	3756.32	3991.03		323	0.646	0.809524	0.5039
2906.38	3760.93	4004.23		324	0.648	0.81203	0.50546
2911.49	3764.88	4006.65		325	0.65	0.814536	0.50702
2918.32	3764.97	4016.7		326	0.652	0.817043	0.50858
2918.89	3782.75	4017.25		327	0.654	0.819549	0.51014
2920.51	3812.23	4021.5		328	0.656	0.822055	0.5117
2924.44	3813.56	4021.82		329	0.658	0.824561	0.513261
2933.08	3830.26	4022.18		330	0.66	0.827068	0.514821
2937.51	3852.08	4027.55		331	0.662	0.829574	0.516381
2940.72	3853.26	4047.14		332	0.664	0.83208	0.517941
2941.41	3856.56	4047.78		333	0.666	0.834586	0.519501
2943.26	3879.18	4048.39		334	0.668	0.837093	0.521061
2943.31	3891.6	4051.74		335	0.67	0.839599	0.522621
2955.23	3898.01	4055.38		336	0.672	0.842105	0.524181
2957.02	3903.8	4064.58		337	0.674	0.844612	0.525741
2965.44	3918.23	4073.73		338	0.676	0.847118	0.527301
2980.9	3928.02	4077.55		339	0.678	0.849624	0.528861
2982.39	3956.46	4080.52		340	0.68	0.85213	0.530421
2991.65	3964.64	4093.04		341	0.682	0.854637	0.531981
3002.33	3969.78	4095.97		342	0.684	0.857143	0.533541
3005.97	3983.25	4101.55		343	0.686	0.859649	0.535101
3008.4	3993.12	4103.9		344	0.688	0.862155	0.536661
3009.7	4029.07	4105.52		345	0.69	0.864662	0.538222
3012.49	4039.5	4111.57		346	0.692	0.867168	0.539782
3026.91	4047.65	4112.43		347	0.694	0.869674	0.541342
3029.2	4060.36	4131.23		348	0.696	0.87218	0.542902
3033.97	4062.44	4132.37		349	0.698	0.874687	0.544462
3045.71	4100.21	4139.41		350	0.7	0.877193	0.546022
3048.47	4103.04	4142.1		351	0.702	0.879699	0.547582
3070.13	4120.77	4142.35		352	0.704	0.882206	0.549142
3083.57	4140.07	4144.31		353	0.706	0.884712	0.550702
3086.67	4143.96	4144.85		354	0.708	0.887218	0.552262
3098.07	4146.77	4148.14		355	0.71	0.889724	0.553822
3103.31	4178.85	4156.93		356	0.712	0.892231	0.555382
3109.79	4184.05	4162.94		357	0.714	0.894737	0.556942
3113.18	4190.42	4163.69		358	0.716	0.897243	0.558502
3125.34	4202.92	4168.98		359	0.718	0.899749	0.560062
3147.57	4262.73	4173.99		360	0.72	0.902256	0.561622
3149.41	4265.27	4181.98		361	0.722	0.904762	0.563183
3153.63	4276.96	4190.19		362	0.724	0.907268	0.564743
3159.8	4278.17	4191.08		363	0.726	0.909774	0.566303
3177.59	4322.43	4196.04		364	0.728	0.912281	0.567863
3195.92	4327.46	4204.73		365	0.73	0.914787	0.569423
3210.86	4349.3	4205.9		366	0.732	0.917293	0.570983
3218.42	4361.54	4211.81		367	0.734	0.919799	0.572543
3229.68	4393.26	4214.61		368	0.736	0.922306	0.574103
3236.09	4425	4217.06		369	0.738	0.924812	0.575663
3244.41	4458.82	4239.68		370	0.74	0.927318	0.577223
3251.95	4478.14	4240.08		371	0.742	0.929825	0.578783
3254.23	4498.2	4245.68		372	0.744	0.932331	0.580343
3258.85	4615.97	4246.33		373	0.746	0.934837	0.581903
3264.13	4635.29	4246.47		374	0.748	0.937343	0.583463
3270.81	4644.03	4254.42		375	0.75	0.93985	0.585023
3291.21	4650.25	4254.9		376	0.752	0.942356	0.586583
3296.74	4689.1	4261.61		377	0.754	0.944862	0.588144
3320.28	4689.49	4265.63		378	0.756	0.947368	0.589704
3330.55	4770.21	4272.79		379	0.758	0.949875	0.591264
3334.28	4783.9	4278.28		380	0.76	0.952381	0.592824
3340.75	4813.73	4284.45		381	0.762	0.954887	0.594384
3344.65	4840.36	4289.22		382	0.764	0.957393	0.595944
3350.32	4850.84	4294.4		383	0.766	0.9599	0.597504
3356.35	4893.21	4297.94		384	0.768	0.962406	0.599064
3370.05	4952.01	4305.67		385	0.77	0.964912	0.600624
3381.92	5010.42	4306.46		386	0.772	0.967419	0.602184
3382.45	5100.27	4312.29		387	0.774	0.969925	0.603744
3383.64	5106.56	4314.56		388	0.776	0.972431	0.605304
3387.75	5236.07	4323.9		389	0.778	0.974937	0.606864
3398.91	5274.04	4331.32		390	0.78	0.977444	0.608424
3402.39	5515.01	4340.86		391	0.782	0.97995	0.609984
3405.28	5568.05	4344.59		392	0.784	0.982456	0.611544
3411.17	5775.04	4352.78		393	0.786	0.984962	0.613105
3411.65	5945.33	4355.07		394	0.788	0.987469	0.614665
3416.58	6156.07	4355.3		395	0.79	0.989975	0.616225
3425.29	6192.95	4363.54		396	0.792	0.992481	0.617785
3429.57	6266.33	4370.83		397	0.794	0.994987	0.619345
3450.07	6424.12	4372.31		398	0.796	0.997494	0.620905
3457.16	6981.83	4372.74		399	0.798	1	0.622465
3459.29		4375.31		400	0.8		0.624025
3467.95		4384.86		401	0.802		0.625585
3483.8		4385.95		402	0.804		0.627145
3498.12		4387.45		403	0.806		0.628705
3498.46		4401.39		404	0.808		0.630265
3505.89		4413.66		405	0.81		0.631825
3506.52		4415.82		406	0.812		0.633385
3506.87		4416.53		407	0.814		0.634945
3528.38		4417.73		408	0.816		0.636505
3565.85		4418.22		409	0.818		0.638066
3594.21		4425.32		410	0.82		0.639626
3608.57		4428.8		411	0.822		0.641186
3613.89		4429.51		412	0.824		0.642746
3644.98		4438.48		413	0.826		0.644306
3649.24		4444.68		414	0.828		0.645866
3651.56		4446.3		415	0.83		0.647426
3677.41		4465.81		416	0.832		0.648986
3679.57		4468.72		417	0.834		0.650546
3684.5		4472		418	0.836		0.652106
3686.74		4476.2		419	0.838		0.653666
3686.91		4481.2		420	0.84		0.655226
3711.5		4488.76		421	0.842		0.656786
3731.12		4499.01		422	0.844		0.658346
3745.76		4502.69		423	0.846		0.659906
3779.75		4502.94		424	0.848		0.661466
3788.56		4506.63		425	0.85		0.663027
3791.47		4520.32		426	0.852		0.664587
3845.04		4520.44		427	0.854		0.666147
3896.87		4523.8		428	0.856		0.667707
3941.32		4530.54		429	0.858		0.669267
3944.26		4530.69		430	0.86		0.670827
3958.49		4531.28		431	0.862		0.672387
3976.6		4532.64		432	0.864		0.673947
4012.93		4538.21		433	0.866		0.675507
4013.12		4539.15		434	0.868		0.677067
4042.42		4542.56		435	0.87		0.678627
4044.74		4543.38		436	0.872		0.680187
4052.9		4544.94		437	0.874		0.681747
4070.87		4547.98		438	0.876		0.683307
4081.55		4549.05		439	0.878		0.684867
4093.73		4554.64		440	0.88		0.686427
4099.79		4562.06		441	0.882		0.687988
4103.38		4569.4		442	0.884		0.689548
4112.1		4579.15		443	0.886		0.691108
4135.59		4579.92		444	0.888		0.692668
4136.92		4583.27		445	0.89		0.694228
4138.43		4593.51		446	0.892		0.695788
4139.83		4596.62		447	0.894		0.697348
4193.28		4599.02		448	0.896		0.698908
4235.57		4599.78		449	0.898		0.700468
4237.75		4600.06		450	0.9		0.702028
4268.99		4607.31		451	0.902		0.703588
4276.07		4626.5		452	0.904		0.705148
4288.48		4629		453	0.906		0.706708
4297.51		4648.82		454	0.908		0.708268
4305.34		4649.69		455	0.91		0.709828
4308.81		4652.35		456	0.912		0.711388
4346.21		4652.82		457	0.914		0.712949
4358.12		4663.2		458	0.916		0.714509
4376.79		4666.21		459	0.918		0.716069
4415.72		4672.29		460	0.92		0.717629
4421.82		4684.73		461	0.922		0.719189
4429.35		4687.44		462	0.924		0.720749
4434.82		4687.58		463	0.926		0.722309
4449.73		4691.62		464	0.928		0.723869
4530.89		4693.76		465	0.93		0.725429
4535.02		4696.21		466	0.932		0.726989
4573.62		4697.16		467	0.934		0.728549
4613.44		4699.14		468	0.936		0.730109
4626.92		4715.53		469	0.938		0.731669
4637.77		4720.77		470	0.94		0.733229
4687.85		4725.3		471	0.942		0.734789
4703.81		4730.74		472	0.944		0.736349
4713.83		4735.52		473	0.946		0.73791
4774		4736.97		474	0.948		0.73947
4817.38		4741.93		475	0.95		0.74103
4824.56		4744.2		476	0.952		0.74259
4856.03		4751.51		477	0.954		0.74415
4883.5		4760.33		478	0.956		0.74571
4906.27		4769.42		479	0.958		0.74727
4908.98		4774.92		480	0.96		0.74883
4926.19		4790.64		481	0.962		0.75039
4940.26		4794.64		482	0.964		0.75195
4940.33		4801.69		483	0.966		0.75351
5070.98		4806.07		484	0.968		0.75507
5088		4817.05		485	0.97		0.75663
5143.59		4817.92		486	0.972		0.75819
5148.32		4839.34		487	0.974		0.75975
5172.09		4842.49		488	0.976		0.76131
5217.07		4843.71		489	0.978		0.762871
5318.72		4848.55		490	0.98		0.764431
5361.21		4850.95		491	0.982		0.765991
5424.19		4854.89		492	0.984		0.767551
5436.26		4862.35		493	0.986		0.769111
5498.22		4877.81		494	0.988		0.770671
5598.15		4902.24		495	0.99		0.772231
5610.04		4927.2		496	0.992		0.773791
5723.35		4933.83		497	0.994		0.775351
5753.03		4936.56		498	0.996		0.776911
6421.21		4937.6		499	0.998		0.778471
6671.88		4938.84		500	1		0.780031
		4940.85		501			0.781591
		4942.29		502			0.783151
		4950.27		503			0.784711
		4951.45		504			0.786271
		4955.56		505			0.787832
		4959.28		506			0.789392
		4963		507			0.790952
		4964.98		508			0.792512
		4965.85		509			0.794072
		4969.2		510			0.795632
		4969.65		511			0.797192
		4971.57		512			0.798752
		4982.11		513			0.800312
		4986.35		514			0.801872
		4990.97		515			0.803432
		4993.48		516			0.804992
		4998.66		517			0.806552
		5000		518			0.808112
		5021.56		519			0.809672
		5044.88		520			0.811232
		5073.65		521			0.812793
		5077.4		522			0.814353
		5084.59		523			0.815913
		5092.95		524			0.817473
		5093.27		525			0.819033
		5093.38		526			0.820593
		5116.97		527			0.822153
		5120.25		528			0.823713
		5128.35		529			0.825273
		5133.69		530			0.826833
		5137.25		531			0.828393
		5141.29		532			0.829953
		5159.55		533			0.831513
		5161.6		534			0.833073
		5185.65		535			0.834633
		5189.04		536			0.836193
		5222.54		537			0.837754
		5231.24		538			0.839314
		5232.31		539			0.840874
		5240.83		540			0.842434
		5240.98		541			0.843994
		5241.95		542			0.845554
		5244.28		543			0.847114
		5256.98		544			0.848674
		5260.78		545			0.850234
		5264		546			0.851794
		5264.27		547			0.853354
		5272.52		548			0.854914
		5286.77		549			0.856474
		5294.35		550			0.858034
		5309.02		551			0.859594
		5321.23		552			0.861154
		5325.05		553			0.862715
		5329.73		554			0.864275
		5338.15		555			0.865835
		5349.62		556			0.867395
		5351.41		557			0.868955
		5356.43		558			0.870515
		5361.45		559			0.872075
		5370.05		560			0.873635
		5378.75		561			0.875195
		5387.01		562			0.876755
		5391.25		563			0.878315
		5393.31		564			0.879875
		5402.76		565			0.881435
		5403.78		566			0.882995
		5416.13		567			0.884555
		5417.42		568			0.886115
		5449.76		569			0.887676
		5455.03		570			0.889236
		5456.89		571			0.890796
		5474.2		572			0.892356
		5478.53		573			0.893916
		5533.73		574			0.895476
		5547.06		575			0.897036
		5547.21		576			0.898596
		5583.82		577			0.900156
		5586.76		578			0.901716
		5606.53		579			0.903276
		5621.21		580			0.904836
		5625.8		581			0.906396
		5626.75		582			0.907956
		5682.54		583			0.909516
		5684.18		584			0.911076
		5691.78		585			0.912637
		5692.45		586			0.914197
		5708.73		587			0.915757
		5722.72		588			0.917317
		5746.49		589			0.918877
		5751.41		590			0.920437
		5759.73		591			0.921997
		5768.21		592			0.923557
		5782.29		593			0.925117
		5787.15		594			0.926677
		5805.43		595			0.928237
		5808.96		596			0.929797
		5816.27		597			0.931357
		5840.08		598			0.932917
		5876.5		599			0.934477
		5891		600			0.936037
		6011.82		601			0.937598
		6047.09		602			0.939158
		6147.04		603			0.940718
		6175.91		604			0.942278
		6216.72		605			0.943838
		6303.14		606			0.945398
		6357.6		607			0.946958
		6382.3		608			0.948518
		6391.54		609			0.950078
		6392.74		610			0.951638
		6414.71		611			0.953198
		6420.49		612			0.954758
		6428.15		613			0.956318
		6433.44		614			0.957878
		6448.29		615			0.959438
		6524.26		616			0.960998
		6563.37		617			0.962559
		6592.46		618			0.964119
		6594.82		619			0.965679
		6603.08		620			0.967239
		6637.48		621			0.968799
		6671.41		622			0.970359
		6690.92		623			0.971919
		6732.67		624			0.973479
		6749.98		625			0.975039
		6792.23		626			0.976599
		6891.01		627			0.978159
		6911.19		628			0.979719
		6913.57		629			0.981279
		7037.99		630			0.982839
		7113.34		631			0.984399
		7131.49		632			0.985959
		7190.29		633			0.98752
		7671.17		634			0.98908
		7683.13		635			0.99064
		7942.87		636			0.9922
		8422.64		637			0.99376
		8611.03		638			0.99532
		9293.27		639			0.99688
		10252.1		640			0.99844
		10493.5		641			1

## Sheet: Fig 5F
K109Q K144Q 70	K109Q K144Q 0Ca	K105Q K144Q 70	K105Q K144Q 0Ca	K105Q K109Q 70	K105Q K109Q 0Ca
-2.79019	11.3719	1.39605	7.19467	1.12886	5.63197
1.23552	17.4063	0.049465	6.74697	0.84914	19.8571
-4.83408	7.28242	0.90569	17.095	-1.80164	8.44888
-2.02411	17.659	-0.81623	8.48946	-0.898505	19.5982
9.72903	17.5314	-0.4224	6.76805	-3.23076	17.039

## Sheet: Fig 5F Box Plot 2
K105Q K234Q 70	K105Q K234Q 0Ca	K144Q K234Q 70	K144Q K234Q 0Ca
0.314395	24.6114	3.8294	11.3629
0.838305	13.6214	5.63716	13.877
6.5879	14.828	5.72733	16.1586
-0.260805	15.1435	2.33777	7.66533
1.94562	11.0932	-0.64775	9.97968
