# Supplementary material for: CO2-dependent opening of connexin 43 hemichannels
Source: eLife. 2026 Jun 3;14:RP105989. doi: 10.7554/eLife.105989 (PMC13233067; doi:10.7554/eLife.105989)
Supplement: Figure 6—source data 1. [file elife-105989-fig6-data1.xlsx]

## Sheet: Fig 6F
K105Q K144Q	K105Q K144Q KCl	K109Q K144Q 55	K109Q K144Q KCl	K105Q K234Q 55	K105Q K234Q KCl
-0.220256	2.01688	-0.243521	2.16176	-0.07738	2.57061
-0.171283	2.54391	-0.232241	2.56941	-0.0683423	2.67169
-0.163106	2.5576	0.00940024	2.82581	-0.0649572	2.76709
-0.153572	2.58216	0.0185654	2.84816	-0.044132	2.77817
-0.137463	2.63923	0.426367	3.05647	-0.0417751	2.79099
0.00986523	2.67104	0.565924	3.09549	-0.0364036	2.83412
0.0103594	2.70043	0.598974	3.43242	0.0170575	2.898
0.0173916	2.73713	0.626597	3.62668	0.032603	2.95634
0.0374058	2.75504	0.629683	3.96635	0.0423392	3.00958
0.0399228	2.77568	0.675278	4.00551	0.0423605	3.02229
0.0528615	2.78556	0.733946	4.15295	0.0567649	3.15848
0.0578631	2.89103	0.878408	4.91265	0.0570444	3.64945
0.059499	2.96493	0.0425025	3.44782	0.0624355	3.68733
0.0641829	3.49046	0.0265133	3.40557	0.0800482	3.71433
0.0736402	4.41403	0.0944263	4.31486	0.166246	3.81481
0.0801622	4.54248	0.0692927	3.35594	0.210434	3.901
0.0908578	4.61915	0.0476553	3.65886	0.244954	4.02751
0.0977148	4.86018	0.037548	3.44063
-0.0558462	3.09854	0.0450789	3.44423
-0.118657	2.93988
-0.0996288	3.06127
-0.0228473	3.04551
-0.0352681	3.14533

## Sheet: Fig 6G
K105Q K109Q 55	K105Q K109Q KCl	K144Q K234Q 55	K144Q K234Q KCl
-0.891552	2.67589	-0.232241	2.32574
-0.40874	2.81726	0.00940024	2.35574
-0.382162	2.88367	0.0185654	2.37696
-0.144073	2.93988	0.0801622	2.40254
-0.122404	3.04551	0.0977148	2.44522
-0.118657	3.06127	0.145469	2.50283
-0.0996288	3.09854	0.19529	2.57361
-0.0558462	3.14533	0.426367	2.67133
-0.043562	3.20743	0.565924	2.77608
-0.0357472	3.33754	0.629683	2.89184
-0.0352681	3.42439	0.675278	2.95266
-0.026437	3.45582	0.703027	2.98592
-0.0234883	3.54111	0.878408	3.00958
-0.0228473	3.72689
-0.00726717	3.94176
0.011921	3.99304
