# Supplementary material for: CO2-dependent opening of connexin 43 hemichannels
Source: eLife. 2026 Jun 3;14:RP105989. doi: 10.7554/eLife.105989 (PMC13233067; doi:10.7554/eLife.105989)
Supplement: Figure 7—source data 1. [file elife-105989-fig7-data1.xlsx]

## Sheet: Fig 7A
K105E
20	70	0 Ca			Cum. Prob. 20	Cum. Prob. 70	Cum. Prob. 0 Ca
351.733	571.923	462.033		1	0.0017331	0.00171233	0.00147059
597.194	620.009	469.788		2	0.0034662	0.00342466	0.00294118
621.304	620.959	491.13		3	0.00519931	0.00513699	0.00441176
704.431	624.361	537.354		4	0.00693241	0.00684932	0.00588235
732.655	679.496	565.784		5	0.00866551	0.00856164	0.00735294
737.433	696.548	656.765		6	0.0103986	0.010274	0.00882353
738.671	702.599	666.698		7	0.0121317	0.0119863	0.0102941
807.201	703.072	711.293		8	0.0138648	0.0136986	0.0117647
819.155	718.211	749.483		9	0.0155979	0.015411	0.0132353
828.069	726.299	756.083		10	0.017331	0.0171233	0.0147059
840.664	734.428	760.657		11	0.0190641	0.0188356	0.0161765
850.458	756.806	796.448		12	0.0207972	0.0205479	0.0176471
871.385	757.373	804.418		13	0.0225303	0.0222603	0.0191176
878.67	766.005	815.946		14	0.0242634	0.0239726	0.0205882
907.915	773.902	845.579		15	0.0259965	0.0256849	0.0220588
910.422	783.412	853.588		16	0.0277296	0.0273973	0.0235294
913.194	783.971	883.949		17	0.0294627	0.0291096	0.025
919.793	806.533	900.155		18	0.0311958	0.0308219	0.0264706
929.949	816.098	901.798		19	0.0329289	0.0325342	0.0279412
930.382	818.618	908.158		20	0.034662	0.0342466	0.0294118
941.073	828.942	910.093		21	0.0363951	0.0359589	0.0308824
943.266	829.145	927.071		22	0.0381282	0.0376712	0.0323529
945.964	834.838	935.015		23	0.0398614	0.0393836	0.0338235
949.091	835.376	942.602		24	0.0415945	0.0410959	0.0352941
950.727	861.069	945.374		25	0.0433276	0.0428082	0.0367647
952.131	864.581	947.597		26	0.0450607	0.0445205	0.0382353
958.895	876.822	955.167		27	0.0467938	0.0462329	0.0397059
971.523	877.688	965.485		28	0.0485269	0.0479452	0.0411765
973.16	889.527	966.87		29	0.05026	0.0496575	0.0426471
974.474	892.275	972.474		30	0.0519931	0.0513699	0.0441176
982.955	897.094	975.311		31	0.0537262	0.0530822	0.0455882
984.443	900.3	975.365		32	0.0554593	0.0547945	0.0470588
984.744	900.493	980.319		33	0.0571924	0.0565068	0.0485294
985.705	903.235	981.65		34	0.0589255	0.0582192	0.05
1004.38	909.754	997.737		35	0.0606586	0.0599315	0.0514706
1017.82	911.617	1000.21		36	0.0623917	0.0616438	0.0529412
1028.91	918.71	1003.28		37	0.0641248	0.0633562	0.0544118
1034.68	926.125	1011.41		38	0.0658579	0.0650685	0.0558824
1035.65	939.421	1023.81		39	0.067591	0.0667808	0.0573529
1038.64	942.111	1026.23		40	0.0693241	0.0684932	0.0588235
1042.61	944.882	1043.76		41	0.0710572	0.0702055	0.0602941
1051.64	952.032	1044.35		42	0.0727903	0.0719178	0.0617647
1054.89	959.851	1045.8		43	0.0745234	0.0736301	0.0632353
1059.01	962.802	1047.42		44	0.0762565	0.0753425	0.0647059
1070.04	965.46	1050.05		45	0.0779896	0.0770548	0.0661765
1070.66	966.539	1050.39		46	0.0797227	0.0787671	0.0676471
1077.21	970.88	1052.25		47	0.0814558	0.0804795	0.0691176
1078.35	972.449	1059.02		48	0.0831889	0.0821918	0.0705882
1079.78	979.068	1063.87		49	0.084922	0.0839041	0.0720588
1093.87	980.413	1064.02		50	0.0866551	0.0856164	0.0735294
1100.02	985.357	1077.76		51	0.0883882	0.0873288	0.075
1100.06	996.562	1078.18		52	0.0901213	0.0890411	0.0764706
1104.31	1002.66	1087.05		53	0.0918544	0.0907534	0.0779412
1109.69	1003.64	1088.79		54	0.0935875	0.0924658	0.0794118
1128.03	1015.54	1089.29		55	0.0953206	0.0941781	0.0808824
1128.1	1020.75	1096.58		56	0.0970537	0.0958904	0.0823529
1132.94	1020.87	1099.05		57	0.0987868	0.0976027	0.0838235
1133.14	1025.8	1106.65		58	0.10052	0.0993151	0.0852941
1134.69	1027.25	1110.53		59	0.102253	0.101027	0.0867647
1138.56	1029.79	1111.66		60	0.103986	0.10274	0.0882353
1143.21	1037.19	1118.04		61	0.105719	0.104452	0.0897059
1149.61	1037.89	1122.14		62	0.107452	0.106164	0.0911765
1150.83	1047.78	1123.25		63	0.109185	0.107877	0.0926471
1153.86	1051.77	1127.59		64	0.110919	0.109589	0.0941176
1156.15	1053.59	1131.37		65	0.112652	0.111301	0.0955882
1158.11	1065.05	1132.44		66	0.114385	0.113014	0.0970588
1164.12	1069.65	1135.55		67	0.116118	0.114726	0.0985294
1168.65	1070.08	1137.84		68	0.117851	0.116438	0.1
1176.88	1074.49	1140.1		69	0.119584	0.118151	0.101471
1185.36	1081.83	1144.33		70	0.121317	0.119863	0.102941
1187.02	1092.59	1145.11		71	0.12305	0.121575	0.104412
1187.32	1096.79	1150.02		72	0.124783	0.123288	0.105882
1187.41	1097.76	1154.92		73	0.126516	0.125	0.107353
1207.85	1099.39	1160.4		74	0.12825	0.126712	0.108824
1209.85	1106.99	1160.41		75	0.129983	0.128425	0.110294
1210.37	1114.65	1162		76	0.131716	0.130137	0.111765
1212.87	1115.02	1172.42		77	0.133449	0.131849	0.113235
1216.14	1120.13	1173.24		78	0.135182	0.133562	0.114706
1226.67	1120.68	1173.74		79	0.136915	0.135274	0.116176
1226.67	1123.78	1177.2		80	0.138648	0.136986	0.117647
1233.91	1125.29	1177.79		81	0.140381	0.138699	0.119118
1235.58	1133.14	1177.82		82	0.142114	0.140411	0.120588
1236.69	1134.35	1178.76		83	0.143847	0.142123	0.122059
1241.38	1134.89	1179.53		84	0.145581	0.143836	0.123529
1246.6	1136.95	1179.76		85	0.147314	0.145548	0.125
1246.77	1137.45	1191.93		86	0.149047	0.14726	0.126471
1251.81	1139.69	1193.67		87	0.15078	0.148973	0.127941
1251.81	1142.72	1195.37		88	0.152513	0.150685	0.129412
1253.3	1144.21	1199.92		89	0.154246	0.152397	0.130882
1253.39	1145.28	1208.36		90	0.155979	0.15411	0.132353
1255.46	1146.49	1220.11		91	0.157712	0.155822	0.133824
1260.27	1156.55	1225.8		92	0.159445	0.157534	0.135294
1261.22	1158.47	1229.21		93	0.161179	0.159247	0.136765
1263.27	1159.08	1231.67		94	0.162912	0.160959	0.138235
1269.33	1164.1	1234.4		95	0.164645	0.162671	0.139706
1273.53	1168.38	1234.87		96	0.166378	0.164384	0.141176
1277.99	1169.31	1236.59		97	0.168111	0.166096	0.142647
1280.07	1171.45	1242.04		98	0.169844	0.167808	0.144118
1286.34	1179.5	1244.81		99	0.171577	0.169521	0.145588
1292.58	1185.51	1248.15		100	0.17331	0.171233	0.147059
1296.82	1185.53	1259.34		101	0.175043	0.172945	0.148529
1296.98	1185.69	1260.96		102	0.176776	0.174658	0.15
1301.77	1186.16	1261.89		103	0.17851	0.17637	0.151471
1302.34	1188.63	1264.86		104	0.180243	0.178082	0.152941
1302.56	1191.12	1265.36		105	0.181976	0.179795	0.154412
1311.28	1195.46	1269.29		106	0.183709	0.181507	0.155882
1314.74	1198.58	1269.82		107	0.185442	0.183219	0.157353
1317.95	1202.58	1272.26		108	0.187175	0.184932	0.158824
1319.67	1205.59	1278.92		109	0.188908	0.186644	0.160294
1324.57	1211.5	1282.71		110	0.190641	0.188356	0.161765
1326.37	1213.96	1283.95		111	0.192374	0.190068	0.163235
1326.37	1217.03	1288.93		112	0.194107	0.191781	0.164706
1339.49	1217.42	1293.9		113	0.195841	0.193493	0.166176
1339.56	1219.82	1302.96		114	0.197574	0.195205	0.167647
1342.76	1221.99	1312.72		115	0.199307	0.196918	0.169118
1344.45	1227.08	1313.42		116	0.20104	0.19863	0.170588
1345.62	1228.86	1314.61		117	0.202773	0.200342	0.172059
1350.33	1233.71	1317.48		118	0.204506	0.202055	0.173529
1350.35	1234.09	1329.02		119	0.206239	0.203767	0.175
1352.21	1237.39	1329.11		120	0.207972	0.205479	0.176471
1355.48	1238.32	1329.96		121	0.209705	0.207192	0.177941
1357.49	1243.81	1345.47		122	0.211438	0.208904	0.179412
1359.62	1250.42	1349.59		123	0.213172	0.210616	0.180882
1364.03	1251.37	1350.46		124	0.214905	0.212329	0.182353
1370.94	1256.04	1351.86		125	0.216638	0.214041	0.183824
1379.96	1256.32	1353.1		126	0.218371	0.215753	0.185294
1383.13	1262.07	1357.03		127	0.220104	0.217466	0.186765
1384.05	1273.49	1358.91		128	0.221837	0.219178	0.188235
1390.6	1275.24	1361.33		129	0.22357	0.22089	0.189706
1400	1278	1363.73		130	0.225303	0.222603	0.191176
1401.35	1278.7	1364.29		131	0.227036	0.224315	0.192647
1403.11	1279.15	1367.48		132	0.228769	0.226027	0.194118
1409.87	1284.19	1367.94		133	0.230503	0.22774	0.195588
1411.21	1284.49	1371.53		134	0.232236	0.229452	0.197059
1411.35	1285.06	1372.53		135	0.233969	0.231164	0.198529
1418.21	1286.81	1387.12		136	0.235702	0.232877	0.2
1422.66	1289.28	1390.15		137	0.237435	0.234589	0.201471
1422.73	1290.71	1391.39		138	0.239168	0.236301	0.202941
1424.39	1293.38	1392.75		139	0.240901	0.238014	0.204412
1428.55	1294.79	1393.37		140	0.242634	0.239726	0.205882
1433.56	1297.6	1398		141	0.244367	0.241438	0.207353
1437.08	1300.3	1405.54		142	0.246101	0.243151	0.208824
1439.46	1301.09	1410.4		143	0.247834	0.244863	0.210294
1439.85	1301.94	1414.92		144	0.249567	0.246575	0.211765
1443.19	1305.33	1420.23		145	0.2513	0.248288	0.213235
1451.16	1311.65	1420.7		146	0.253033	0.25	0.214706
1452.31	1312.31	1425.7		147	0.254766	0.251712	0.216176
1453.1	1314.32	1428.13		148	0.256499	0.253425	0.217647
1455.02	1315.33	1428.48		149	0.258232	0.255137	0.219118
1457.65	1317.48	1435.81		150	0.259965	0.256849	0.220588
1458.05	1319.92	1436.8		151	0.261698	0.258562	0.222059
1458.92	1323.74	1437.14		152	0.263432	0.260274	0.223529
1460.85	1327.36	1438.22		153	0.265165	0.261986	0.225
1471.96	1327.6	1439.64		154	0.266898	0.263699	0.226471
1475.23	1332.16	1441.09		155	0.268631	0.265411	0.227941
1475.28	1342.32	1444.85		156	0.270364	0.267123	0.229412
1486.16	1351.98	1449.18		157	0.272097	0.268836	0.230882
1486.22	1352.57	1455.71		158	0.27383	0.270548	0.232353
1493.58	1355.17	1455.78		159	0.275563	0.27226	0.233824
1505.53	1356.38	1456.31		160	0.277296	0.273973	0.235294
1506.35	1359.07	1457.34		161	0.279029	0.275685	0.236765
1507.52	1359.28	1464.01		162	0.280763	0.277397	0.238235
1510.33	1363	1466.69		163	0.282496	0.27911	0.239706
1511.66	1366.52	1471.15		164	0.284229	0.280822	0.241176
1511.7	1377.46	1471.85		165	0.285962	0.282534	0.242647
1516.55	1377.62	1483.84		166	0.287695	0.284247	0.244118
1517.3	1388.46	1492.39		167	0.289428	0.285959	0.245588
1522.23	1390.37	1495.78		168	0.291161	0.287671	0.247059
1523.45	1392.88	1498.04		169	0.292894	0.289384	0.248529
1523.74	1393.72	1498.08		170	0.294627	0.291096	0.25
1527.04	1395.92	1498.33		171	0.29636	0.292808	0.251471
1529.52	1400.07	1498.93		172	0.298094	0.294521	0.252941
1532.38	1402.14	1499.91		173	0.299827	0.296233	0.254412
1536.27	1406.2	1502.9		174	0.30156	0.297945	0.255882
1536.71	1406.53	1509.32		175	0.303293	0.299658	0.257353
1540.16	1412.98	1511.11		176	0.305026	0.30137	0.258824
1541.59	1425.33	1513.97		177	0.306759	0.303082	0.260294
1541.83	1428.21	1514.82		178	0.308492	0.304795	0.261765
1552.84	1429.56	1519.61		179	0.310225	0.306507	0.263235
1554.08	1430.5	1522.64		180	0.311958	0.308219	0.264706
1554.58	1432.86	1523.09		181	0.313692	0.309932	0.266176
1561.15	1437.23	1523.4		182	0.315425	0.311644	0.267647
1561.83	1438.45	1527.04		183	0.317158	0.313356	0.269118
1561.91	1442.05	1528.16		184	0.318891	0.315068	0.270588
1562.78	1449.72	1537.47		185	0.320624	0.316781	0.272059
1567.46	1453.34	1538.64		186	0.322357	0.318493	0.273529
1578.04	1453.64	1541.66		187	0.32409	0.320205	0.275
1580.4	1456.37	1545.04		188	0.325823	0.321918	0.276471
1581.61	1458.19	1548.49		189	0.327556	0.32363	0.277941
1583.7	1459.97	1550.99		190	0.329289	0.325342	0.279412
1590.62	1462.72	1551.78		191	0.331023	0.327055	0.280882
1597.82	1467.25	1552.81		192	0.332756	0.328767	0.282353
1602.02	1474.15	1554.63		193	0.334489	0.330479	0.283824
1602.02	1474.55	1554.64		194	0.336222	0.332192	0.285294
1608.1	1477.82	1563.53		195	0.337955	0.333904	0.286765
1624.18	1480.4	1570.36		196	0.339688	0.335616	0.288235
1626.4	1481.77	1570.61		197	0.341421	0.337329	0.289706
1626.4	1484.97	1571.59		198	0.343154	0.339041	0.291176
1628.33	1495.79	1573.79		199	0.344887	0.340753	0.292647
1639.93	1498.78	1575.11		200	0.34662	0.342466	0.294118
1642.64	1506.22	1577.22		201	0.348354	0.344178	0.295588
1644.38	1508.37	1579.59		202	0.350087	0.34589	0.297059
1647.24	1509.93	1590.16		203	0.35182	0.347603	0.298529
1654.74	1515.34	1590.16		204	0.353553	0.349315	0.3
1660.88	1518.17	1592.8		205	0.355286	0.351027	0.301471
1661.16	1519.09	1597.05		206	0.357019	0.35274	0.302941
1663.82	1519.54	1597.54		207	0.358752	0.354452	0.304412
1672.64	1521.83	1597.75		208	0.360485	0.356164	0.305882
1675.37	1523.99	1599.4		209	0.362218	0.357877	0.307353
1679.22	1526.18	1605.42		210	0.363951	0.359589	0.308824
1682.13	1529.67	1609.66		211	0.365685	0.361301	0.310294
1685.59	1537.46	1612.36		212	0.367418	0.363014	0.311765
1690.84	1538.49	1615.87		213	0.369151	0.364726	0.313235
1700.35	1538.56	1630.27		214	0.370884	0.366438	0.314706
1700.43	1542.22	1636.2		215	0.372617	0.368151	0.316176
1702.77	1545.11	1639.84		216	0.37435	0.369863	0.317647
1703.63	1561.29	1651.19		217	0.376083	0.371575	0.319118
1708.7	1564.34	1651.7		218	0.377816	0.373288	0.320588
1709.44	1564.8	1655.44		219	0.379549	0.375	0.322059
1710.54	1566.05	1665.59		220	0.381282	0.376712	0.323529
1710.74	1569.81	1676.8		221	0.383016	0.378425	0.325
1713.81	1570.61	1685.33		222	0.384749	0.380137	0.326471
1715.54	1581.5	1690.27		223	0.386482	0.381849	0.327941
1715.54	1592.73	1690.8		224	0.388215	0.383562	0.329412
1719.76	1595.35	1694.29		225	0.389948	0.385274	0.330882
1727.73	1597.98	1694.31		226	0.391681	0.386986	0.332353
1728.78	1608.22	1695.38		227	0.393414	0.388699	0.333824
1730.65	1614.87	1699.33		228	0.395147	0.390411	0.335294
1732.06	1617.43	1699.43		229	0.39688	0.392123	0.336765
1735.22	1625.88	1708.28		230	0.398614	0.393836	0.338235
1742.36	1627.93	1715.6		231	0.400347	0.395548	0.339706
1744.41	1628.86	1717.57		232	0.40208	0.39726	0.341176
1753.66	1628.93	1728.12		233	0.403813	0.398973	0.342647
1762.06	1636.19	1736.17		234	0.405546	0.400685	0.344118
1767.16	1641.78	1737.36		235	0.407279	0.402397	0.345588
1771.16	1644.47	1738.83		236	0.409012	0.40411	0.347059
1771.6	1646.78	1739.53		237	0.410745	0.405822	0.348529
1772.38	1648.96	1739.93		238	0.412478	0.407534	0.35
1774.68	1653.4	1745.77		239	0.414211	0.409247	0.351471
1777	1657.36	1746.21		240	0.415945	0.410959	0.352941
1777.93	1659.95	1751.43		241	0.417678	0.412671	0.354412
1782.31	1662.4	1752.9		242	0.419411	0.414384	0.355882
1789.86	1663.46	1754.91		243	0.421144	0.416096	0.357353
1796.17	1664.44	1764.1		244	0.422877	0.417808	0.358824
1805.18	1671.7	1780.07		245	0.42461	0.419521	0.360294
1809.07	1675.85	1784.63		246	0.426343	0.421233	0.361765
1809.94	1676.45	1789.77		247	0.428076	0.422945	0.363235
1813.13	1677.02	1793.24		248	0.429809	0.424658	0.364706
1814.13	1688.15	1797.33		249	0.431542	0.42637	0.366176
1820.38	1702.3	1799.13		250	0.433276	0.428082	0.367647
1823.92	1711.75	1804.86		251	0.435009	0.429795	0.369118
1833.1	1713.7	1804.91		252	0.436742	0.431507	0.370588
1835.38	1713.77	1814.54		253	0.438475	0.433219	0.372059
1844.36	1722.23	1816.62		254	0.440208	0.434932	0.373529
1848.55	1725.12	1818.1		255	0.441941	0.436644	0.375
1848.93	1736.34	1824.71		256	0.443674	0.438356	0.376471
1850.65	1747.19	1825.29		257	0.445407	0.440068	0.377941
1854.59	1750.25	1831.32		258	0.44714	0.441781	0.379412
1861.02	1758.02	1835.92		259	0.448873	0.443493	0.380882
1863.76	1765.16	1843.31		260	0.450607	0.445205	0.382353
1868.96	1765.36	1846.78		261	0.45234	0.446918	0.383824
1872.7	1778.56	1852.69		262	0.454073	0.44863	0.385294
1874.89	1797.75	1853.3		263	0.455806	0.450342	0.386765
1880.41	1816.41	1862.38		264	0.457539	0.452055	0.388235
1885.09	1825.68	1864.51		265	0.459272	0.453767	0.389706
1895.19	1827.02	1869.67		266	0.461005	0.455479	0.391176
1907.47	1828.22	1874.8		267	0.462738	0.457192	0.392647
1913.32	1830.66	1884.7		268	0.464471	0.458904	0.394118
1923.42	1858.98	1884.89		269	0.466205	0.460616	0.395588
1923.61	1859.6	1885.97		270	0.467938	0.462329	0.397059
1936.79	1866.11	1886.88		271	0.469671	0.464041	0.398529
1939.14	1872.22	1892.85		272	0.471404	0.465753	0.4
1939.99	1879.38	1894.32		273	0.473137	0.467466	0.401471
1945.61	1898.21	1894.43		274	0.47487	0.469178	0.402941
1947.06	1899.1	1894.99		275	0.476603	0.47089	0.404412
1958.66	1905.17	1897.71		276	0.478336	0.472603	0.405882
1959.05	1906.42	1908.69		277	0.480069	0.474315	0.407353
1959.39	1911.24	1910.58		278	0.481802	0.476027	0.408824
1960.69	1911.86	1912.69		279	0.483536	0.47774	0.410294
1968.13	1912.18	1918.91		280	0.485269	0.479452	0.411765
1978.02	1917.63	1920.62		281	0.487002	0.481164	0.413235
1980.3	1932.5	1923.12		282	0.488735	0.482877	0.414706
1985.96	1932.5	1928.08		283	0.490468	0.484589	0.416176
1987.38	1932.92	1930.6		284	0.492201	0.486301	0.417647
1991.14	1941.48	1950.84		285	0.493934	0.488014	0.419118
1997.44	1959.72	1953.07		286	0.495667	0.489726	0.420588
1997.6	1982.49	1957.17		287	0.4974	0.491438	0.422059
1998.03	2036.62	1961.89		288	0.499133	0.493151	0.423529
2002.66	2037.34	1968.51		289	0.500867	0.494863	0.425
2004.27	2046.79	1969.06		290	0.5026	0.496575	0.426471
2007.37	2052.05	1974.88		291	0.504333	0.498288	0.427941
2010.74	2054.75	1976.87		292	0.506066	0.5	0.429412
2014.09	2059.67	1988.18		293	0.507799	0.501712	0.430882
2034.63	2061.38	1992.11		294	0.509532	0.503425	0.432353
2040.64	2077.28	1995.8		295	0.511265	0.505137	0.433824
2043.55	2094.59	2010.8		296	0.512998	0.506849	0.435294
2047.07	2097.21	2014.4		297	0.514731	0.508562	0.436765
2047.54	2099.94	2031.78		298	0.516464	0.510274	0.438235
2049.17	2107.59	2040.91		299	0.518198	0.511986	0.439706
2049.59	2108.89	2041.86		300	0.519931	0.513699	0.441176
2050.68	2122.01	2044.25		301	0.521664	0.515411	0.442647
2053.24	2154.3	2051.6		302	0.523397	0.517123	0.444118
2077.68	2173.43	2057.58		303	0.52513	0.518836	0.445588
2078.38	2180.93	2057.6		304	0.526863	0.520548	0.447059
2085.46	2187.19	2059.44		305	0.528596	0.52226	0.448529
2085.46	2194.64	2074.8		306	0.530329	0.523973	0.45
2089.35	2236.95	2075.13		307	0.532062	0.525685	0.451471
2095.24	2243.1	2075.48		308	0.533795	0.527397	0.452941
2102.98	2244.49	2077.53		309	0.535529	0.52911	0.454412
2112.53	2284.64	2084.43		310	0.537262	0.530822	0.455882
2126.13	2299.19	2091.3		311	0.538995	0.532534	0.457353
2130.34	2301.83	2092.24		312	0.540728	0.534247	0.458824
2130.96	2308.19	2103.25		313	0.542461	0.535959	0.460294
2135.39	2308.48	2103.7		314	0.544194	0.537671	0.461765
2145.91	2309.64	2128.52		315	0.545927	0.539384	0.463235
2146.07	2316.29	2129.77		316	0.54766	0.541096	0.464706
2156.84	2324.62	2159.18		317	0.549393	0.542808	0.466176
2159.05	2330.07	2161.53		318	0.551127	0.544521	0.467647
2163.83	2336.69	2162.74		319	0.55286	0.546233	0.469118
2173.16	2343.54	2173.64		320	0.554593	0.547945	0.470588
2175.88	2343.8	2187.06		321	0.556326	0.549658	0.472059
2176.06	2379.54	2192.42		322	0.558059	0.55137	0.473529
2176.27	2391.79	2199.47		323	0.559792	0.553082	0.475
2179.14	2407.05	2209.2		324	0.561525	0.554795	0.476471
2182.13	2421.07	2213.42		325	0.563258	0.556507	0.477941
2182.13	2423.09	2229.86		326	0.564991	0.558219	0.479412
2189.04	2438.97	2231.51		327	0.566724	0.559932	0.480882
2194.22	2439.32	2235.05		328	0.568458	0.561644	0.482353
2198.31	2464.25	2236.08		329	0.570191	0.563356	0.483824
2201.3	2500.51	2241.8		330	0.571924	0.565068	0.485294
2204	2510.43	2253.44		331	0.573657	0.566781	0.486765
2214.38	2513.25	2264.81		332	0.57539	0.568493	0.488235
2215.41	2513.8	2267.36		333	0.577123	0.570205	0.489706
2220.63	2535.83	2267.36		334	0.578856	0.571918	0.491176
2226.1	2536.43	2284.26		335	0.580589	0.57363	0.492647
2249.47	2536.51	2291.84		336	0.582322	0.575342	0.494118
2261.88	2540.53	2298.18		337	0.584055	0.577055	0.495588
2267.64	2563.86	2309.28		338	0.585789	0.578767	0.497059
2273.75	2577.33	2310.07		339	0.587522	0.580479	0.498529
2278.57	2584.84	2316.04		340	0.589255	0.582192	0.5
2281.3	2598.99	2317.74		341	0.590988	0.583904	0.501471
2296.62	2600.34	2326.82		342	0.592721	0.585616	0.502941
2296.77	2600.34	2337.66		343	0.594454	0.587329	0.504412
2301.09	2602.09	2358.99		344	0.596187	0.589041	0.505882
2309.7	2608.82	2364.61		345	0.59792	0.590753	0.507353
2312.14	2612.15	2367.32		346	0.599653	0.592466	0.508824
2317.33	2641.35	2367.78		347	0.601386	0.594178	0.510294
2319.63	2643.95	2369.06		348	0.60312	0.59589	0.511765
2325.04	2653.92	2388.04		349	0.604853	0.597603	0.513235
2333.18	2659.7	2390.8		350	0.606586	0.599315	0.514706
2338.94	2664.21	2405.12		351	0.608319	0.601027	0.516176
2346.26	2672.63	2417.22		352	0.610052	0.60274	0.517647
2348.89	2684.58	2433.16		353	0.611785	0.604452	0.519118
2355.48	2685.63	2438.71		354	0.613518	0.606164	0.520588
2361.74	2693.54	2446.48		355	0.615251	0.607877	0.522059
2367.33	2702.07	2446.99		356	0.616984	0.609589	0.523529
2368.71	2703.61	2462.9		357	0.618718	0.611301	0.525
2380.8	2706.97	2462.93		358	0.620451	0.613014	0.526471
2384.82	2740.69	2471.48		359	0.622184	0.614726	0.527941
2388.79	2749.02	2484.74		360	0.623917	0.616438	0.529412
2393.83	2760.28	2486.76		361	0.62565	0.618151	0.530882
2395.93	2779.01	2488.28		362	0.627383	0.619863	0.532353
2401.35	2817.84	2490.47		363	0.629116	0.621575	0.533824
2404.22	2817.96	2501.11		364	0.630849	0.623288	0.535294
2412.7	2821.92	2503.43		365	0.632582	0.625	0.536765
2414.89	2851.23	2507.26		366	0.634315	0.626712	0.538235
2428.54	2862.94	2522.91		367	0.636049	0.628425	0.539706
2429.2	2895.95	2531.08		368	0.637782	0.630137	0.541176
2433.22	2905.06	2549.51		369	0.639515	0.631849	0.542647
2434.08	2915.78	2559.07		370	0.641248	0.633562	0.544118
2450.32	2918.74	2565.52		371	0.642981	0.635274	0.545588
2452.21	2921.86	2571.68		372	0.644714	0.636986	0.547059
2452.8	2926.99	2592.98		373	0.646447	0.638699	0.548529
2466.27	2987.29	2593.78		374	0.64818	0.640411	0.55
2468.9	2993.25	2597.62		375	0.649913	0.642123	0.551471
2477.03	2996.99	2616.21		376	0.651646	0.643836	0.552941
2483.18	3016.35	2622.18		377	0.65338	0.645548	0.554412
2491.85	3037.85	2623.44		378	0.655113	0.64726	0.555882
2497.35	3044.47	2633.35		379	0.656846	0.648973	0.557353
2500.63	3044.48	2650.94		380	0.658579	0.650685	0.558824
2506.12	3048.84	2651.29		381	0.660312	0.652397	0.560294
2516.52	3058.18	2654.02		382	0.662045	0.65411	0.561765
2526.23	3091.57	2654.93		383	0.663778	0.655822	0.563235
2532.89	3093.45	2655.31		384	0.665511	0.657534	0.564706
2535.77	3097.65	2656.54		385	0.667244	0.659247	0.566176
2536.74	3103.84	2657.72		386	0.668977	0.660959	0.567647
2538.47	3112.97	2668.04		387	0.670711	0.662671	0.569118
2541.52	3112.97	2675.73		388	0.672444	0.664384	0.570588
2544.65	3138.76	2680.68		389	0.674177	0.666096	0.572059
2552.66	3141.43	2687.02		390	0.67591	0.667808	0.573529
2560.7	3145.66	2695.3		391	0.677643	0.669521	0.575
2564.44	3150.45	2701.32		392	0.679376	0.671233	0.576471
2572.17	3189.17	2702.21		393	0.681109	0.672945	0.577941
2576.16	3211.82	2703.2		394	0.682842	0.674658	0.579412
2576.91	3213.2	2704.43		395	0.684575	0.67637	0.580882
2586.57	3231.71	2710.06		396	0.686308	0.678082	0.582353
2587.78	3259.08	2717.88		397	0.688042	0.679795	0.583824
2589.48	3260.91	2730.4		398	0.689775	0.681507	0.585294
2590.61	3288.8	2732.86		399	0.691508	0.683219	0.586765
2599.93	3292.01	2750.55		400	0.693241	0.684932	0.588235
2610.45	3292.1	2760.17		401	0.694974	0.686644	0.589706
2610.72	3298.28	2764.74		402	0.696707	0.688356	0.591176
2611.93	3317.05	2765.47		403	0.69844	0.690068	0.592647
2611.93	3319.19	2766.83		404	0.700173	0.691781	0.594118
2628.08	3329	2776.06		405	0.701906	0.693493	0.595588
2637.48	3330.89	2778.49		406	0.70364	0.695205	0.597059
2640.57	3344.2	2780.51		407	0.705373	0.696918	0.598529
2646.86	3350.31	2801.23		408	0.707106	0.69863	0.6
2647.22	3352.32	2803.92		409	0.708839	0.700342	0.601471
2649.26	3356.73	2806.46		410	0.710572	0.702055	0.602941
2653.96	3362.93	2810.24		411	0.712305	0.703767	0.604412
2660.86	3395.17	2816.41		412	0.714038	0.705479	0.605882
2661.98	3398.5	2825.99		413	0.715771	0.707192	0.607353
2674.42	3402.25	2828.52		414	0.717504	0.708904	0.608824
2675.64	3404.88	2829.78		415	0.719237	0.710616	0.610294
2675.77	3410.16	2832.85		416	0.720971	0.712329	0.611765
2676.32	3416.33	2833.68		417	0.722704	0.714041	0.613235
2676.57	3416.63	2848.59		418	0.724437	0.715753	0.614706
2678.21	3427.04	2855.23		419	0.72617	0.717466	0.616176
2678.51	3453.35	2865.79		420	0.727903	0.719178	0.617647
2679.05	3463.84	2866.55		421	0.729636	0.72089	0.619118
2683.52	3472.25	2868.63		422	0.731369	0.722603	0.620588
2688.12	3473.8	2884.19		423	0.733102	0.724315	0.622059
2706.35	3480.36	2901.36		424	0.734835	0.726027	0.623529
2715.5	3503.43	2905.91		425	0.736568	0.72774	0.625
2721.61	3507.3	2907.46		426	0.738302	0.729452	0.626471
2730.92	3508.94	2914.69		427	0.740035	0.731164	0.627941
2749.32	3511.62	2923.75		428	0.741768	0.732877	0.629412
2753.83	3511.84	2925.65		429	0.743501	0.734589	0.630882
2757.14	3524.53	2936.78		430	0.745234	0.736301	0.632353
2759.36	3529.56	2943.08		431	0.746967	0.738014	0.633824
2766.82	3551.3	2953.21		432	0.7487	0.739726	0.635294
2773.66	3551.96	2962.09		433	0.750433	0.741438	0.636765
2787.49	3556.73	2967.37		434	0.752166	0.743151	0.638235
2790.76	3574.33	2975.95		435	0.753899	0.744863	0.639706
2803.02	3589.91	2977.22		436	0.755633	0.746575	0.641176
2809.55	3618.86	2984.57		437	0.757366	0.748288	0.642647
2819.23	3630.4	2993.71		438	0.759099	0.75	0.644118
2823.18	3636.51	2997		439	0.760832	0.751712	0.645588
2842.21	3638.86	3001.47		440	0.762565	0.753425	0.647059
2844.75	3644.79	3002.24		441	0.764298	0.755137	0.648529
2846.49	3651.88	3016.69		442	0.766031	0.756849	0.65
2854.5	3655.02	3021.3		443	0.767764	0.758562	0.651471
2857.08	3674.55	3025.06		444	0.769497	0.760274	0.652941
2863.83	3675.48	3039.93		445	0.771231	0.761986	0.654412
2870.91	3687.63	3048.4		446	0.772964	0.763699	0.655882
2872.07	3691.48	3065.97		447	0.774697	0.765411	0.657353
2875.5	3693.87	3070.47		448	0.77643	0.767123	0.658824
2878.37	3711.69	3073.59		449	0.778163	0.768836	0.660294
2887.77	3715.79	3083.22		450	0.779896	0.770548	0.661765
2899.4	3718.12	3092.44		451	0.781629	0.77226	0.663235
2903.1	3725.39	3099.7		452	0.783362	0.773973	0.664706
2909.18	3734.81	3102.68		453	0.785095	0.775685	0.666176
2924.11	3738.55	3106.01		454	0.786828	0.777397	0.667647
2926.63	3751.92	3113.79		455	0.788562	0.77911	0.669118
2931.64	3752.68	3114.05		456	0.790295	0.780822	0.670588
2937.04	3757.88	3121.61		457	0.792028	0.782534	0.672059
2941.11	3765.12	3128.85		458	0.793761	0.784247	0.673529
2941.25	3765.51	3130.32		459	0.795494	0.785959	0.675
2943.45	3765.7	3133.03		460	0.797227	0.787671	0.676471
2945.15	3767.09	3136.95		461	0.79896	0.789384	0.677941
2945.93	3783.31	3140.84		462	0.800693	0.791096	0.679412
2953.55	3786.91	3167.74		463	0.802426	0.792808	0.680882
2960.83	3811.46	3182.34		464	0.804159	0.794521	0.682353
2973.58	3818.56	3186.05		465	0.805893	0.796233	0.683824
2975.64	3821.86	3200.22		466	0.807626	0.797945	0.685294
2982.33	3823.66	3201.53		467	0.809359	0.799658	0.686765
2998.35	3850.92	3207.66		468	0.811092	0.80137	0.688235
3002.41	3855.17	3209.17		469	0.812825	0.803082	0.689706
3009.76	3871.36	3213.64		470	0.814558	0.804795	0.691176
3019.51	3876.02	3215.33		471	0.816291	0.806507	0.692647
3039.38	3876.02	3224.55		472	0.818024	0.808219	0.694118
3045.96	3877.84	3226.28		473	0.819757	0.809932	0.695588
3046.34	3878.32	3241.93		474	0.82149	0.811644	0.697059
3048.16	3884.58	3242.76		475	0.823224	0.813356	0.698529
3053.65	3901.12	3246.19		476	0.824957	0.815068	0.7
3061.07	3912.43	3249.19		477	0.82669	0.816781	0.701471
3061.94	3919.4	3252.07		478	0.828423	0.818493	0.702941
3071.56	3922.22	3260.33		479	0.830156	0.820205	0.704412
3085.64	3923.32	3261.25		480	0.831889	0.821918	0.705882
3093.72	3923.9	3285.88		481	0.833622	0.82363	0.707353
3095.08	3924.79	3287.64		482	0.835355	0.825342	0.708824
3095.28	3934.99	3292.08		483	0.837088	0.827055	0.710294
3095.64	3942.9	3294.38		484	0.838821	0.828767	0.711765
3119.47	3947.41	3302.23		485	0.840555	0.830479	0.713235
3124.27	3952.59	3302.24		486	0.842288	0.832192	0.714706
3144.03	3952.61	3302.97		487	0.844021	0.833904	0.716176
3149.75	3973.42	3304.54		488	0.845754	0.835616	0.717647
3154.57	4034.6	3307.85		489	0.847487	0.837329	0.719118
3156.85	4035.28	3312.88		490	0.84922	0.839041	0.720588
3165.28	4036.83	3331.67		491	0.850953	0.840753	0.722059
3171.49	4079.12	3333.93		492	0.852686	0.842466	0.723529
3173.07	4098.06	3337.02		493	0.854419	0.844178	0.725
3177.2	4101.72	3352.54		494	0.856153	0.84589	0.726471
3180.45	4105.54	3352.62		495	0.857886	0.847603	0.727941
3184.19	4114.99	3356.91		496	0.859619	0.849315	0.729412
3187.63	4119.8	3357.31		497	0.861352	0.851027	0.730882
3204.17	4129.3	3358.19		498	0.863085	0.85274	0.732353
3210.74	4164.5	3387.25		499	0.864818	0.854452	0.733824
3215.33	4188.68	3388.8		500	0.866551	0.856164	0.735294
3217.65	4189.19	3389.78		501	0.868284	0.857877	0.736765
3230.62	4193.04	3398.01		502	0.870017	0.859589	0.738235
3240.72	4209.95	3399.77		503	0.87175	0.861301	0.739706
3241.78	4219.12	3400.24		504	0.873484	0.863014	0.741176
3277.2	4226.05	3404.18		505	0.875217	0.864726	0.742647
3277.25	4230	3410.28		506	0.87695	0.866438	0.744118
3287.27	4230.1	3413.11		507	0.878683	0.868151	0.745588
3288.36	4230.94	3420.29		508	0.880416	0.869863	0.747059
3288.74	4233.82	3420.41		509	0.882149	0.871575	0.748529
3290.25	4234.25	3422.38		510	0.883882	0.873288	0.75
3298.1	4259.71	3422.88		511	0.885615	0.875	0.751471
3310.34	4280.09	3431.13		512	0.887348	0.876712	0.752941
3313.15	4302.22	3436.27		513	0.889081	0.878425	0.754412
3316.03	4311.56	3456.66		514	0.890815	0.880137	0.755882
3317.77	4317.49	3458.89		515	0.892548	0.881849	0.757353
3319.98	4385.49	3461.72		516	0.894281	0.883562	0.758824
3329.35	4387.52	3463.12		517	0.896014	0.885274	0.760294
3330.11	4395.56	3468.45		518	0.897747	0.886986	0.761765
3334.3	4401.6	3473.14		519	0.89948	0.888699	0.763235
3360.65	4419.77	3474.25		520	0.901213	0.890411	0.764706
3377.18	4421.19	3475.43		521	0.902946	0.892123	0.766176
3390.16	4427.5	3479.85		522	0.904679	0.893836	0.767647
3394.31	4430.32	3501.24		523	0.906412	0.895548	0.769118
3399.54	4433.38	3504.8		524	0.908146	0.89726	0.770588
3428.97	4444.41	3506.87		525	0.909879	0.898973	0.772059
3431.88	4449.96	3510.01		526	0.911612	0.900685	0.773529
3437.09	4461.69	3511.7		527	0.913345	0.902397	0.775
3443.45	4474.89	3535.59		528	0.915078	0.90411	0.776471
3444.75	4478.27	3543.18		529	0.916811	0.905822	0.777941
3497.27	4479.84	3545.66		530	0.918544	0.907534	0.779412
3505.76	4489.46	3546.07		531	0.920277	0.909247	0.780882
3521.56	4493.71	3547.7		532	0.92201	0.910959	0.782353
3523.04	4495.21	3548.55		533	0.923744	0.912671	0.783824
3524.91	4507.85	3553.34		534	0.925477	0.914384	0.785294
3527.49	4520.01	3553.4		535	0.92721	0.916096	0.786765
3542.17	4522.01	3558.86		536	0.928943	0.917808	0.788235
3548.2	4534.22	3562.09		537	0.930676	0.919521	0.789706
3555.51	4540.19	3565.26		538	0.932409	0.921233	0.791176
3563.65	4565.4	3568.41		539	0.934142	0.922945	0.792647
3567.29	4597.65	3574.29		540	0.935875	0.924658	0.794118
3568.73	4599.45	3584.23		541	0.937608	0.92637	0.795588
3584.84	4617.77	3586.01		542	0.939341	0.928082	0.797059
3589.99	4618.44	3606.95		543	0.941075	0.929795	0.798529
3620.06	4622.03	3624.43		544	0.942808	0.931507	0.8
3644.82	4658.06	3628.95		545	0.944541	0.933219	0.801471
3659.81	4665.77	3641.35		546	0.946274	0.934932	0.802941
3683.44	4673.18	3653.81		547	0.948007	0.936644	0.804412
3686.63	4687.16	3661.57		548	0.94974	0.938356	0.805882
3688.86	4755.01	3664.22		549	0.951473	0.940068	0.807353
3696.94	4784.33	3664.37		550	0.953206	0.941781	0.808824
3721.89	4820.34	3667.88		551	0.954939	0.943493	0.810294
3750.99	4860.37	3677.98		552	0.956672	0.945205	0.811765
3811.25	4907.69	3690.04		553	0.958406	0.946918	0.813235
3832.31	4910.34	3695.21		554	0.960139	0.94863	0.814706
3841.99	4954.49	3699.31		555	0.961872	0.950342	0.816176
3848.93	4977.85	3700.2		556	0.963605	0.952055	0.817647
3907.42	4993.98	3706.2		557	0.965338	0.953767	0.819118
3915.05	5003.49	3710.64		558	0.967071	0.955479	0.820588
3926.61	5052.73	3713.3		559	0.968804	0.957192	0.822059
3947.9	5074.31	3720.28		560	0.970537	0.958904	0.823529
4100.27	5135.59	3751.91		561	0.97227	0.960616	0.825
4118.76	5206.42	3752.13		562	0.974003	0.962329	0.826471
4124.12	5215.48	3755.28		563	0.975737	0.964041	0.827941
4132.7	5218.73	3757.86		564	0.97747	0.965753	0.829412
4150.98	5254.39	3767.47		565	0.979203	0.967466	0.830882
4217.36	5337.94	3767.63		566	0.980936	0.969178	0.832353
4235.14	5352.24	3778.35		567	0.982669	0.97089	0.833824
4239.71	5364.09	3779.74		568	0.984402	0.972603	0.835294
4267.43	5437.28	3785.66		569	0.986135	0.974315	0.836765
4291.8	5463.2	3787.45		570	0.987868	0.976027	0.838235
4348.6	5597.17	3793.46		571	0.989601	0.97774	0.839706
4427.29	5648.8	3811.27		572	0.991334	0.979452	0.841176
4450.4	5680.03	3817.87		573	0.993068	0.981164	0.842647
4496.56	5737.11	3832.96		574	0.994801	0.982877	0.844118
4511.04	5858.85	3833.97		575	0.996534	0.984589	0.845588
4548.45	6148.8	3836.12		576	0.998267	0.986301	0.847059
5366.31	6244.1	3871.58		577	1	0.988014	0.848529
	6244.1	3889.36		578		0.989726	0.85
	6290.24	3894.83		579		0.991438	0.851471
	6479.13	3900.58		580		0.993151	0.852941
	6887.76	3908.64		581		0.994863	0.854412
	7012.94	3912.35		582		0.996575	0.855882
	9243.73	3924.13		583		0.998288	0.857353
	10284.6	3936.8		584		1	0.858824
		3944.32		585			0.860294
		3949.99		586			0.861765
		3951.54		587			0.863235
		3961.14		588			0.864706
		3971.24		589			0.866176
		3972.72		590			0.867647
		4026.91		591			0.869118
		4027.08		592			0.870588
		4031.34		593			0.872059
		4068.89		594			0.873529
		4069.43		595			0.875
		4069.65		596			0.876471
		4072.75		597			0.877941
		4080.45		598			0.879412
		4096.15		599			0.880882
		4096.88		600			0.882353
		4112.02		601			0.883824
		4138.88		602			0.885294
		4140.69		603			0.886765
		4147.58		604			0.888235
		4171.31		605			0.889706
		4182.67		606			0.891176
		4187.64		607			0.892647
		4191.33		608			0.894118
		4204.22		609			0.895588
		4206.04		610			0.897059
		4207.23		611			0.898529
		4208.05		612			0.9
		4224.79		613			0.901471
		4275.76		614			0.902941
		4281.07		615			0.904412
		4306.26		616			0.905882
		4307.61		617			0.907353
		4314.98		618			0.908824
		4329.14		619			0.910294
		4399.47		620			0.911765
		4400.14		621			0.913235
		4419.98		622			0.914706
		4435.41		623			0.916176
		4454.98		624			0.917647
		4464.97		625			0.919118
		4483.68		626			0.920588
		4499.86		627			0.922059
		4501.83		628			0.923529
		4501.95		629			0.925
		4527.31		630			0.926471
		4547.67		631			0.927941
		4562.2		632			0.929412
		4562.83		633			0.930882
		4572.5		634			0.932353
		4584.72		635			0.933824
		4602.62		636			0.935294
		4603.45		637			0.936765
		4617.54		638			0.938235
		4671.75		639			0.939706
		4688.25		640			0.941176
		4689.33		641			0.942647
		4689.45		642			0.944118
		4725.74		643			0.945588
		4743.68		644			0.947059
		4767.62		645			0.948529
		4833.67		646			0.95
		4868.98		647			0.951471
		4872.59		648			0.952941
		4894.36		649			0.954412
		4897.08		650			0.955882
		4900.22		651			0.957353
		4911.44		652			0.958824
		4988.88		653			0.960294
		4998.01		654			0.961765
		5047.29		655			0.963235
		5065.75		656			0.964706
		5067.52		657			0.966176
		5079.48		658			0.967647
		5083.85		659			0.969118
		5101.7		660			0.970588
		5162.6		661			0.972059
		5219.57		662			0.973529
		5237.35		663			0.975
		5422.85		664			0.976471
		5523.07		665			0.977941
		5582.08		666			0.979412
		5612.59		667			0.980882
		5639.01		668			0.982353
		6019.59		669			0.983824
		6029.81		670			0.985294
		6170.83		671			0.986765
		6426.43		672			0.988235
		6519.89		673			0.989706
		6531.28		674			0.991176
		6660.39		675			0.992647
		6822.42		676			0.994118
		6958.51		677			0.995588
		6991.24		678			0.997059
		7098.53		679			0.998529
		7752.37		680			1

## Sheet: Fig 7B
K144E
20	70	0Ca			Cum. Prob. 20	Cum. Prob. 70	Cum. Prob. 0 Ca
341.905	360.598	890.05		1	0.00177936	0.00234192	0.00240385
451.101	389.795	951.087		2	0.00355872	0.00468384	0.00480769
468.243	407.248	975.579		3	0.00533808	0.00702576	0.00721154
485.171	424.453	1020.46		4	0.00711744	0.00936768	0.00961538
500.409	446.528	1110.46		5	0.0088968	0.0117096	0.0120192
527.88	460.392	1145.76		6	0.0106762	0.0140515	0.0144231
528.288	475.745	1147.69		7	0.0124555	0.0163934	0.0168269
542.65	478.084	1166.59		8	0.0142349	0.0187354	0.0192308
551.382	479.262	1169.59		9	0.0160142	0.0210773	0.0216346
559.468	482.465	1183.36		10	0.0177936	0.0234192	0.0240385
562.402	486.393	1258.01		11	0.019573	0.0257611	0.0264423
566.055	491.248	1271.88		12	0.0213523	0.028103	0.0288462
569.492	500.61	1294.94		13	0.0231317	0.030445	0.03125
573.324	510.58	1295.2		14	0.024911	0.0327869	0.0336538
583.571	522.956	1301.22		15	0.0266904	0.0351288	0.0360577
583.585	528.525	1305.65		16	0.0284698	0.0374707	0.0384615
592.884	529.936	1306.71		17	0.0302491	0.0398126	0.0408654
597.134	532.342	1312.56		18	0.0320285	0.0421546	0.0432692
603.62	533.985	1325.55		19	0.0338078	0.0444965	0.0456731
604.435	540.57	1339.08		20	0.0355872	0.0468384	0.0480769
606.177	545.404	1346.75		21	0.0373665	0.0491803	0.0504808
606.737	545.415	1351.21		22	0.0391459	0.0515222	0.0528846
607.33	547.427	1359.95		23	0.0409253	0.0538642	0.0552885
608.902	550.517	1366.73		24	0.0427046	0.0562061	0.0576923
614.367	560.898	1372.11		25	0.044484	0.058548	0.0600962
620.101	570.384	1380.61		26	0.0462633	0.0608899	0.0625
627.031	593.658	1385.26		27	0.0480427	0.0632319	0.0649038
627.08	597.149	1403.97		28	0.0498221	0.0655738	0.0673077
629.925	599.257	1408.82		29	0.0516014	0.0679157	0.0697115
633.698	600.308	1414.01		30	0.0533808	0.0702576	0.0721154
634.456	601.066	1414.71		31	0.0551601	0.0725995	0.0745192
637.478	610.092	1417.6		32	0.0569395	0.0749415	0.0769231
645.138	615.459	1423.48		33	0.0587189	0.0772834	0.0793269
647.941	624.582	1436.05		34	0.0604982	0.0796253	0.0817308
649.655	627.102	1445.79		35	0.0622776	0.0819672	0.0841346
651.659	627.26	1456.44		36	0.0640569	0.0843091	0.0865385
657.5	628.091	1462.15		37	0.0658363	0.0866511	0.0889423
657.753	632.218	1470.57		38	0.0676157	0.088993	0.0913462
662.305	636.495	1470.67		39	0.069395	0.0913349	0.09375
665.326	640.99	1479.77		40	0.0711744	0.0936768	0.0961538
667.912	646.561	1482.11		41	0.0729537	0.0960187	0.0985577
668.587	647.032	1482.23		42	0.0747331	0.0983607	0.100962
670.421	647.756	1492.86		43	0.0765125	0.100703	0.103365
670.866	652.811	1500.93		44	0.0782918	0.103044	0.105769
671.145	654.343	1509.74		45	0.0800712	0.105386	0.108173
672.778	654.957	1515.33		46	0.0818505	0.107728	0.110577
679.257	655.685	1517.04		47	0.0836299	0.11007	0.112981
679.958	657.082	1523.63		48	0.0854093	0.112412	0.115385
681.803	657.213	1527.2		49	0.0871886	0.114754	0.117788
683.06	659.967	1546.62		50	0.088968	0.117096	0.120192
684.958	661.653	1549.48		51	0.0907473	0.119438	0.122596
688.072	661.741	1562.97		52	0.0925267	0.12178	0.125
690.021	662.918	1564.37		53	0.094306	0.124122	0.127404
691.536	681.617	1571.6		54	0.0960854	0.126464	0.129808
693.099	681.775	1572.65		55	0.0978648	0.128806	0.132212
699.697	682.493	1578.5		56	0.0996441	0.131148	0.134615
702.424	688.601	1579.9		57	0.101423	0.133489	0.137019
704.066	691.987	1588.09		58	0.103203	0.135831	0.139423
706.47	692.605	1589.89		59	0.104982	0.138173	0.141827
708.357	694.306	1594.05		60	0.106762	0.140515	0.144231
709.232	695.647	1594.05		61	0.108541	0.142857	0.146635
710.853	696.172	1597.68		62	0.11032	0.145199	0.149038
712.172	697.619	1597.75		63	0.1121	0.147541	0.151442
714.51	699.453	1597.84		64	0.113879	0.149883	0.153846
716.503	699.504	1602.88		65	0.115658	0.152225	0.15625
720.32	699.643	1603.47		66	0.117438	0.154567	0.158654
721.261	701.095	1608.85		67	0.119217	0.156909	0.161058
724.112	701.879	1610.18		68	0.120996	0.159251	0.163462
725.832	704.596	1613.72		69	0.122776	0.161593	0.165865
731.205	708.122	1618.96		70	0.124555	0.163934	0.168269
731.346	708.661	1619.26		71	0.126335	0.166276	0.170673
731.666	712.514	1619.94		72	0.128114	0.168618	0.173077
732.375	717.856	1658.49		73	0.129893	0.17096	0.175481
733.164	717.981	1660.7		74	0.131673	0.173302	0.177885
734.926	719.765	1664.64		75	0.133452	0.175644	0.180288
735.935	720.102	1670.76		76	0.135231	0.177986	0.182692
736.888	720.827	1688.56		77	0.137011	0.180328	0.185096
739.826	722.03	1698.37		78	0.13879	0.18267	0.1875
740.144	726.685	1720.37		79	0.140569	0.185012	0.189904
742.163	732.329	1724.5		80	0.142349	0.187354	0.192308
743.86	737.786	1729.05		81	0.144128	0.189696	0.194712
744.201	739.777	1741.76		82	0.145907	0.192037	0.197115
745.598	743.993	1747.66		83	0.147687	0.194379	0.199519
746.524	745.856	1749.95		84	0.149466	0.196721	0.201923
746.989	749.47	1764.55		85	0.151246	0.199063	0.204327
748.046	756.249	1766.63		86	0.153025	0.201405	0.206731
749.172	762.569	1766.83		87	0.154804	0.203747	0.209135
749.635	768.562	1771.72		88	0.156584	0.206089	0.211538
750.291	770.999	1772.28		89	0.158363	0.208431	0.213942
750.485	772.072	1791.11		90	0.160142	0.210773	0.216346
751.196	774.827	1807.74		91	0.161922	0.213115	0.21875
751.423	775.123	1821.19		92	0.163701	0.215457	0.221154
751.666	778.812	1849.87		93	0.16548	0.217799	0.223558
753.903	780.076	1850.8		94	0.16726	0.220141	0.225962
754.913	780.45	1851.65		95	0.169039	0.222482	0.228365
757.418	786.575	1858.65		96	0.170819	0.224824	0.230769
763.521	786.912	1861.22		97	0.172598	0.227166	0.233173
767.288	789.626	1864.02		98	0.174377	0.229508	0.235577
771.11	793.128	1865.83		99	0.176157	0.23185	0.237981
771.431	793.3	1883.78		100	0.177936	0.234192	0.240385
773.571	797.484	1887.07		101	0.179715	0.236534	0.242788
774.128	799.178	1891.7		102	0.181495	0.238876	0.245192
774.775	801.982	1896.7		103	0.183274	0.241218	0.247596
776.141	802.055	1901.54		104	0.185053	0.24356	0.25
781.92	803.011	1901.72		105	0.186833	0.245902	0.252404
782.058	806.811	1902.41		106	0.188612	0.248244	0.254808
789.107	807.356	1911.76		107	0.190391	0.250585	0.257212
790.418	809.772	1913.94		108	0.192171	0.252927	0.259615
792.011	813.82	1918.88		109	0.19395	0.255269	0.262019
792.125	814.929	1926.75		110	0.19573	0.257611	0.264423
793.012	817.884	1926.85		111	0.197509	0.259953	0.266827
794.381	818.183	1945.44		112	0.199288	0.262295	0.269231
794.647	818.469	1947.37		113	0.201068	0.264637	0.271635
794.726	820.705	1950.86		114	0.202847	0.266979	0.274038
795.452	820.824	1952.04		115	0.204626	0.269321	0.276442
796.354	830.679	1964.62		116	0.206406	0.271663	0.278846
798.088	832.609	1972.98		117	0.208185	0.274005	0.28125
799.287	832.826	1975.48		118	0.209964	0.276347	0.283654
799.82	833.188	1986.93		119	0.211744	0.278689	0.286058
800.688	833.63	1987.27		120	0.213523	0.28103	0.288462
800.948	834.628	1993.89		121	0.215302	0.283372	0.290865
801.008	835.555	2001.23		122	0.217082	0.285714	0.293269
801.835	837.93	2003.64		123	0.218861	0.288056	0.295673
803.874	839.551	2004.23		124	0.220641	0.290398	0.298077
804.701	841.122	2004.36		125	0.22242	0.29274	0.300481
805.533	841.247	2016.07		126	0.224199	0.295082	0.302885
806.816	843.54	2018.84		127	0.225979	0.297424	0.305288
807.583	844.022	2022.92		128	0.227758	0.299766	0.307692
807.768	844.33	2025.91		129	0.229537	0.302108	0.310096
809.278	844.558	2029.32		130	0.231317	0.30445	0.3125
810.676	846.792	2037.07		131	0.233096	0.306792	0.314904
811.942	847.288	2042.52		132	0.234875	0.309133	0.317308
814.99	848.792	2046.73		133	0.236655	0.311475	0.319712
824.64	849.627	2050.93		134	0.238434	0.313817	0.322115
824.764	851.617	2056.66		135	0.240214	0.316159	0.324519
825.893	854.309	2061.27		136	0.241993	0.318501	0.326923
828.677	857.35	2065.3		137	0.243772	0.320843	0.329327
829.593	859.588	2065.69		138	0.245552	0.323185	0.331731
831.566	860.372	2067.08		139	0.247331	0.325527	0.334135
832.191	861.664	2071.61		140	0.24911	0.327869	0.336538
835.039	862.982	2072.99		141	0.25089	0.330211	0.338942
835.122	863.785	2075.73		142	0.252669	0.332553	0.341346
835.522	864.546	2082.27		143	0.254448	0.334895	0.34375
836.64	865.822	2088.77		144	0.256228	0.337237	0.346154
836.994	868.584	2090.9		145	0.258007	0.339578	0.348558
839.712	871.694	2093.45		146	0.259786	0.34192	0.350962
841.169	873.401	2095.42		147	0.261566	0.344262	0.353365
842.442	873.649	2096.37		148	0.263345	0.346604	0.355769
842.533	875.398	2099.82		149	0.265125	0.348946	0.358173
844.446	878.366	2099.84		150	0.266904	0.351288	0.360577
844.636	878.73	2103.6		151	0.268683	0.35363	0.362981
845.956	885.211	2109.89		152	0.270463	0.355972	0.365385
846.66	885.242	2110.2		153	0.272242	0.358314	0.367788
849.908	885.293	2112.34		154	0.274021	0.360656	0.370192
851.288	886.165	2114.44		155	0.275801	0.362998	0.372596
852.762	889.595	2126.19		156	0.27758	0.36534	0.375
855.512	890.203	2140.54		157	0.279359	0.367681	0.377404
856.503	894.022	2140.63		158	0.281139	0.370023	0.379808
857.916	896.896	2146.12		159	0.282918	0.372365	0.382212
858.158	898.153	2147.97		160	0.284698	0.374707	0.384615
858.672	898.566	2155.08		161	0.286477	0.377049	0.387019
859.402	899.228	2175.31		162	0.288256	0.379391	0.389423
859.408	904.23	2175.49		163	0.290036	0.381733	0.391827
861.119	907.097	2178.91		164	0.291815	0.384075	0.394231
862.17	907.375	2179.28		165	0.293594	0.386417	0.396635
862.645	907.788	2186.26		166	0.295374	0.388759	0.399038
862.958	908.109	2188.21		167	0.297153	0.391101	0.401442
863.275	909.096	2190.8		168	0.298932	0.393443	0.403846
865.819	909.205	2194.99		169	0.300712	0.395785	0.40625
867.443	915.167	2195.94		170	0.302491	0.398126	0.408654
870.048	916.96	2197.36		171	0.30427	0.400468	0.411058
872.31	917.217	2197.62		172	0.30605	0.40281	0.413462
873.554	919.489	2203.43		173	0.307829	0.405152	0.415865
873.763	920.106	2207.61		174	0.309609	0.407494	0.418269
873.834	921.998	2207.82		175	0.311388	0.409836	0.420673
876.698	930.416	2221.45		176	0.313167	0.412178	0.423077
878.733	930.602	2222.97		177	0.314947	0.41452	0.425481
881.612	930.656	2223.22		178	0.316726	0.416862	0.427885
881.691	931.49	2224.27		179	0.318505	0.419204	0.430288
883.082	931.693	2226.38		180	0.320285	0.421546	0.432692
883.116	933.829	2232.27		181	0.322064	0.423888	0.435096
883.569	934.593	2246.42		182	0.323843	0.42623	0.4375
883.974	939.935	2248.68		183	0.325623	0.428571	0.439904
887.059	947.99	2251.91		184	0.327402	0.430913	0.442308
887.64	948.383	2262.33		185	0.329181	0.433255	0.444712
887.781	949.37	2263.61		186	0.330961	0.435597	0.447115
888.6	953.884	2266.64		187	0.33274	0.437939	0.449519
888.809	957.338	2270.07		188	0.33452	0.440281	0.451923
889.631	958.38	2273.34		189	0.336299	0.442623	0.454327
890.668	959.944	2273.36		190	0.338078	0.444965	0.456731
890.836	961.378	2287.93		191	0.339858	0.447307	0.459135
891.086	962.246	2292.48		192	0.341637	0.449649	0.461538
891.238	965.06	2295.28		193	0.343416	0.451991	0.463942
892.168	966.251	2303.21		194	0.345196	0.454333	0.466346
892.181	970.694	2304.84		195	0.346975	0.456674	0.46875
892.541	973.627	2309.57		196	0.348754	0.459016	0.471154
893.047	974.606	2310.36		197	0.350534	0.461358	0.473558
894.01	976.461	2311.22		198	0.352313	0.4637	0.475962
894.353	976.563	2316.65		199	0.354093	0.466042	0.478365
895.336	976.675	2318.52		200	0.355872	0.468384	0.480769
896.681	980.026	2322.58		201	0.357651	0.470726	0.483173
897.783	985.72	2327.15		202	0.359431	0.473068	0.485577
899.456	987.016	2329.14		203	0.36121	0.47541	0.487981
900.159	987.312	2332.06		204	0.362989	0.477752	0.490385
901.089	993.233	2343.03		205	0.364769	0.480094	0.492788
901.305	994.392	2352.03		206	0.366548	0.482436	0.495192
902.426	995.319	2352.24		207	0.368327	0.484778	0.497596
902.94	999.44	2358.79		208	0.370107	0.487119	0.5
902.965	1001.52	2371.44		209	0.371886	0.489461	0.502404
903.072	1003.35	2374.47		210	0.373665	0.491803	0.504808
903.15	1005.16	2374.92		211	0.375445	0.494145	0.507212
903.363	1007.55	2374.94		212	0.377224	0.496487	0.509615
904.276	1008.98	2383.42		213	0.379004	0.498829	0.512019
904.993	1009.38	2385.67		214	0.380783	0.501171	0.514423
905.834	1009.99	2401.32		215	0.382562	0.503513	0.516827
907.543	1010.2	2402.13		216	0.384342	0.505855	0.519231
909.626	1013.63	2405.05		217	0.386121	0.508197	0.521635
910.367	1014.96	2410.78		218	0.3879	0.510539	0.524038
910.809	1015.36	2416.46		219	0.38968	0.512881	0.526442
910.921	1017.12	2418.05		220	0.391459	0.515222	0.528846
912.39	1018.88	2424.22		221	0.393238	0.517564	0.53125
915.411	1024.65	2425.82		222	0.395018	0.519906	0.533654
918.426	1025.13	2426.34		223	0.396797	0.522248	0.536058
920.129	1028.01	2435.34		224	0.398577	0.52459	0.538462
920.173	1028.58	2437.31		225	0.400356	0.526932	0.540865
922.447	1033.49	2439.28		226	0.402135	0.529274	0.543269
923.269	1033.79	2447.99		227	0.403915	0.531616	0.545673
923.366	1036.62	2458.59		228	0.405694	0.533958	0.548077
925.158	1038.6	2464.22		229	0.407473	0.5363	0.550481
926.6	1042	2464.77		230	0.409253	0.538642	0.552885
926.811	1046.51	2477.72		231	0.411032	0.540984	0.555288
929.327	1046.56	2478		232	0.412811	0.543326	0.557692
930.048	1047.53	2483.49		233	0.414591	0.545667	0.560096
930.05	1047.9	2486.15		234	0.41637	0.548009	0.5625
930.93	1048	2488.95		235	0.418149	0.550351	0.564904
931.059	1049.52	2499.3		236	0.419929	0.552693	0.567308
931.375	1051.65	2507.12		237	0.421708	0.555035	0.569712
931.383	1051.83	2511.1		238	0.423488	0.557377	0.572115
931.512	1052.38	2513.8		239	0.425267	0.559719	0.574519
932.839	1056.64	2515.94		240	0.427046	0.562061	0.576923
935.674	1058.74	2519.87		241	0.428826	0.564403	0.579327
937.652	1061.69	2520.48		242	0.430605	0.566745	0.581731
940.886	1063.56	2525.77		243	0.432384	0.569087	0.584135
942.004	1066.09	2525.84		244	0.434164	0.571429	0.586538
942.033	1066.14	2533.13		245	0.435943	0.57377	0.588942
943.27	1066.8	2534.82		246	0.437722	0.576112	0.591346
944.541	1067.01	2534.99		247	0.439502	0.578454	0.59375
944.66	1069.76	2549.13		248	0.441281	0.580796	0.596154
944.795	1069.76	2554.57		249	0.44306	0.583138	0.598558
946.278	1069.81	2558.84		250	0.44484	0.58548	0.600962
946.857	1071	2560.17		251	0.446619	0.587822	0.603365
947.435	1071.37	2561.62		252	0.448399	0.590164	0.605769
948.537	1072.13	2562.79		253	0.450178	0.592506	0.608173
948.665	1072.77	2568.59		254	0.451957	0.594848	0.610577
950.69	1076.44	2577.97		255	0.453737	0.59719	0.612981
951.943	1079.57	2583.21		256	0.455516	0.599532	0.615385
953.013	1081.73	2590.67		257	0.457295	0.601874	0.617788
953.784	1081.76	2601.61		258	0.459075	0.604215	0.620192
963.55	1082.34	2603.89		259	0.460854	0.606557	0.622596
963.712	1086.35	2633.46		260	0.462633	0.608899	0.625
963.716	1086.77	2641		261	0.464413	0.611241	0.627404
963.946	1087.24	2647.13		262	0.466192	0.613583	0.629808
967.778	1088.69	2651.47		263	0.467972	0.615925	0.632212
969.799	1090.21	2661.41		264	0.469751	0.618267	0.634615
972.333	1092.02	2662.26		265	0.47153	0.620609	0.637019
972.552	1093.16	2663.73		266	0.47331	0.622951	0.639423
972.624	1094.52	2668.38		267	0.475089	0.625293	0.641827
973.783	1094.62	2674.13		268	0.476868	0.627635	0.644231
975.198	1097.23	2676.49		269	0.478648	0.629977	0.646635
975.944	1098.37	2690.36		270	0.480427	0.632319	0.649038
976.11	1098.68	2694.39		271	0.482206	0.63466	0.651442
976.128	1107.06	2700.01		272	0.483986	0.637002	0.653846
977.335	1108.74	2701.18		273	0.485765	0.639344	0.65625
979.75	1109.96	2714.04		274	0.487544	0.641686	0.658654
980.696	1110.25	2718.78		275	0.489324	0.644028	0.661058
983.143	1112.46	2720.8		276	0.491103	0.64637	0.663462
985.504	1112.79	2721.75		277	0.492883	0.648712	0.665865
987.116	1113.34	2723.09		278	0.494662	0.651054	0.668269
988.83	1114.49	2723.85		279	0.496441	0.653396	0.670673
990.657	1115.04	2737.38		280	0.498221	0.655738	0.673077
990.956	1115.91	2741.36		281	0.5	0.65808	0.675481
991.092	1115.93	2741.7		282	0.501779	0.660422	0.677885
992.204	1118.42	2743.28		283	0.503559	0.662763	0.680288
992.35	1121.24	2751.18		284	0.505338	0.665105	0.682692
993.363	1121.46	2764.22		285	0.507117	0.667447	0.685096
993.51	1126.4	2771.07		286	0.508897	0.669789	0.6875
996.836	1129.38	2771.91		287	0.510676	0.672131	0.689904
996.972	1131.8	2777.55		288	0.512456	0.674473	0.692308
998.435	1132.24	2789.4		289	0.514235	0.676815	0.694712
1004.02	1138.13	2792.1		290	0.516014	0.679157	0.697115
1004.88	1142.44	2793.51		291	0.517794	0.681499	0.699519
1009.41	1143.04	2793.88		292	0.519573	0.683841	0.701923
1010.55	1143.89	2794.83		293	0.521352	0.686183	0.704327
1010.97	1145.03	2802.71		294	0.523132	0.688525	0.706731
1011.64	1145.53	2808.33		295	0.524911	0.690867	0.709135
1012.68	1151.13	2831.74		296	0.52669	0.693208	0.711538
1015.34	1154.15	2835.09		297	0.52847	0.69555	0.713942
1016.99	1154.54	2848.18		298	0.530249	0.697892	0.716346
1018.17	1156.98	2852.24		299	0.532028	0.700234	0.71875
1018.23	1160.54	2853.02		300	0.533808	0.702576	0.721154
1018.5	1163.88	2871.18		301	0.535587	0.704918	0.723558
1019.26	1165.94	2882.36		302	0.537367	0.70726	0.725962
1019.41	1165.99	2887.76		303	0.539146	0.709602	0.728365
1019.99	1167.51	2899.19		304	0.540925	0.711944	0.730769
1020.54	1169.37	2901.47		305	0.542705	0.714286	0.733173
1021.25	1173	2907.39		306	0.544484	0.716628	0.735577
1022.28	1173.21	2923.06		307	0.546263	0.71897	0.737981
1023.78	1178.77	2929.9		308	0.548043	0.721311	0.740385
1024.37	1181.47	2936.1		309	0.549822	0.723653	0.742788
1025.84	1182.78	2951.22		310	0.551601	0.725995	0.745192
1028.49	1183.66	2951.37		311	0.553381	0.728337	0.747596
1028.7	1188.25	2952.97		312	0.55516	0.730679	0.75
1029.53	1196.79	2956.03		313	0.55694	0.733021	0.752404
1030.12	1196.89	2969.53		314	0.558719	0.735363	0.754808
1030.52	1199.48	2975.92		315	0.560498	0.737705	0.757212
1031.47	1200.98	2988.7		316	0.562278	0.740047	0.759615
1031.63	1206.82	2989.73		317	0.564057	0.742389	0.762019
1031.75	1208.19	3002.1		318	0.565836	0.744731	0.764423
1032.01	1219.13	3002.11		319	0.567616	0.747073	0.766827
1032.49	1223.59	3002.55		320	0.569395	0.749415	0.769231
1032.85	1234.97	3002.99		321	0.571174	0.751756	0.771635
1033.08	1239.79	3003.11		322	0.572954	0.754098	0.774038
1033.42	1245.58	3008.94		323	0.574733	0.75644	0.776442
1037.93	1246.02	3010.64		324	0.576512	0.758782	0.778846
1038.65	1250.95	3026.94		325	0.578292	0.761124	0.78125
1038.66	1252.53	3027.51		326	0.580071	0.763466	0.783654
1040.53	1252.61	3047.13		327	0.581851	0.765808	0.786058
1040.6	1260.09	3052.66		328	0.58363	0.76815	0.788462
1040.82	1260.22	3053.76		329	0.585409	0.770492	0.790865
1044.47	1267.01	3064.32		330	0.587189	0.772834	0.793269
1044.62	1267.65	3067.61		331	0.588968	0.775176	0.795673
1044.74	1268.94	3069.94		332	0.590747	0.777518	0.798077
1044.76	1275.37	3079.45		333	0.592527	0.779859	0.800481
1046.34	1276.33	3082.74		334	0.594306	0.782201	0.802885
1053.28	1277.69	3085.51		335	0.596085	0.784543	0.805288
1054.18	1278.82	3085.55		336	0.597865	0.786885	0.807692
1054.83	1286.94	3088.87		337	0.599644	0.789227	0.810096
1056.54	1287.63	3097.76		338	0.601423	0.791569	0.8125
1056.96	1288.77	3121.37		339	0.603203	0.793911	0.814904
1060.46	1290.72	3126.75		340	0.604982	0.796253	0.817308
1060.67	1296.39	3126.81		341	0.606762	0.798595	0.819712
1061.2	1303.34	3132.94		342	0.608541	0.800937	0.822115
1061.27	1304.81	3135.34		343	0.61032	0.803279	0.824519
1061.57	1310.83	3140.39		344	0.6121	0.805621	0.826923
1066.21	1318.71	3144.08		345	0.613879	0.807963	0.829327
1066.56	1318.73	3148.95		346	0.615658	0.810304	0.831731
1067.71	1320.09	3156.33		347	0.617438	0.812646	0.834135
1067.94	1325.21	3157.76		348	0.619217	0.814988	0.836538
1071.62	1326.64	3161.85		349	0.620996	0.81733	0.838942
1071.98	1330.6	3161.88		350	0.622776	0.819672	0.841346
1076.12	1331.63	3162.15		351	0.624555	0.822014	0.84375
1076.86	1336.92	3162.27		352	0.626335	0.824356	0.846154
1078.39	1346.29	3173.18		353	0.628114	0.826698	0.848558
1078.93	1370.93	3204.56		354	0.629893	0.82904	0.850962
1079.89	1371.72	3216.22		355	0.631673	0.831382	0.853365
1081.7	1373.9	3296.82		356	0.633452	0.833724	0.855769
1082.1	1376.59	3308.1		357	0.635231	0.836066	0.858173
1085.69	1378.04	3310.97		358	0.637011	0.838407	0.860577
1086.09	1378.45	3313.03		359	0.63879	0.840749	0.862981
1087.1	1382.67	3335.18		360	0.640569	0.843091	0.865385
1088.04	1383.09	3354.62		361	0.642349	0.845433	0.867788
1088.21	1383.25	3358.95		362	0.644128	0.847775	0.870192
1088.32	1383.45	3368.46		363	0.645907	0.850117	0.872596
1091.89	1389.55	3368.78		364	0.647687	0.852459	0.875
1094.65	1391.53	3377.76		365	0.649466	0.854801	0.877404
1095.95	1391.77	3385.86		366	0.651246	0.857143	0.879808
1096.49	1392.72	3391.22		367	0.653025	0.859485	0.882212
1097.78	1393.05	3403.03		368	0.654804	0.861827	0.884615
1097.78	1397.91	3405.06		369	0.656584	0.864169	0.887019
1098.23	1398.47	3408.28		370	0.658363	0.866511	0.889423
1098.7	1400.99	3411.35		371	0.660142	0.868852	0.891827
1100.74	1409.82	3412.18		372	0.661922	0.871194	0.894231
1100.92	1410.02	3422.97		373	0.663701	0.873536	0.896635
1101.99	1416.76	3423.04		374	0.66548	0.875878	0.899038
1103.08	1419.73	3462.47		375	0.66726	0.87822	0.901442
1103.59	1426.75	3481.1		376	0.669039	0.880562	0.903846
1104.16	1436.36	3483.38		377	0.670819	0.882904	0.90625
1105.78	1444.91	3547.11		378	0.672598	0.885246	0.908654
1107.01	1445.37	3549.79		379	0.674377	0.887588	0.911058
1111.01	1467.33	3576.18		380	0.676157	0.88993	0.913462
1118.2	1476.3	3584.85		381	0.677936	0.892272	0.915865
1118.53	1487.15	3587.09		382	0.679715	0.894614	0.918269
1121.21	1493.22	3630.56		383	0.681495	0.896956	0.920673
1121.24	1504.06	3632.72		384	0.683274	0.899297	0.923077
1122.75	1509.11	3646.44		385	0.685053	0.901639	0.925481
1125.75	1513.16	3676.72		386	0.686833	0.903981	0.927885
1126.72	1525.48	3683.41		387	0.688612	0.906323	0.930288
1127.02	1528.15	3709.23		388	0.690391	0.908665	0.932692
1129.1	1535.12	3712.58		389	0.692171	0.911007	0.935096
1131.39	1537.61	3757.54		390	0.69395	0.913349	0.9375
1131.98	1557.51	3760.64		391	0.69573	0.915691	0.939904
1132.34	1572.09	3761.62		392	0.697509	0.918033	0.942308
1132.44	1573.86	3772.51		393	0.699288	0.920375	0.944712
1133.29	1580.54	3783.82		394	0.701068	0.922717	0.947115
1135.84	1585.94	3803.51		395	0.702847	0.925059	0.949519
1136.34	1593.06	3815.73		396	0.704626	0.9274	0.951923
1137.08	1600.69	3851.05		397	0.706406	0.929742	0.954327
1138.33	1629.24	3858.17		398	0.708185	0.932084	0.956731
1138.37	1636.62	3868.26		399	0.709964	0.934426	0.959135
1141.97	1660.96	3920.64		400	0.711744	0.936768	0.961538
1142.16	1673.31	3950.07		401	0.713523	0.93911	0.963942
1143.29	1686.43	3961.69		402	0.715302	0.941452	0.966346
1144.74	1706.81	4000.88		403	0.717082	0.943794	0.96875
1145.65	1718.07	4046.27		404	0.718861	0.946136	0.971154
1146.85	1720.97	4052.28		405	0.720641	0.948478	0.973558
1147.15	1723.18	4095.72		406	0.72242	0.95082	0.975962
1148.22	1736.4	4100.36		407	0.724199	0.953162	0.978365
1148.73	1763.22	4108.2		408	0.725979	0.955504	0.980769
1149.3	1773.74	4181.63		409	0.727758	0.957845	0.983173
1150.3	1782.23	4225.34		410	0.729537	0.960187	0.985577
1151.12	1791.76	4290.05		411	0.731317	0.962529	0.987981
1152.01	1795.87	4309.64		412	0.733096	0.964871	0.990385
1163.39	1816.89	4376.12		413	0.734875	0.967213	0.992788
1165.84	1824.96	4413.15		414	0.736655	0.969555	0.995192
1166.47	1853.44	4427.15		415	0.738434	0.971897	0.997596
1167.06	1889.83	4457.37		416	0.740214	0.974239	1
1172.26	1904.06			417	0.741993	0.976581
1175.52	1922.22			418	0.743772	0.978923
1176.58	2010.76			419	0.745552	0.981265
1179.68	2029.45			420	0.747331	0.983607
1180.31	2081.45			421	0.74911	0.985948
1185	2146.84			422	0.75089	0.98829
1186.84	2151.26			423	0.752669	0.990632
1191.77	2172.98			424	0.754448	0.992974
1192.67	2230.62			425	0.756228	0.995316
1195.95	2249.7			426	0.758007	0.997658
1197.8	2934.47			427	0.759786	1
1202.12				428	0.761566
1202.21				429	0.763345
1207.11				430	0.765125
1209.75				431	0.766904
1211.31				432	0.768683
1212.79				433	0.770463
1214.44				434	0.772242
1214.61				435	0.774021
1216.01				436	0.775801
1219.45				437	0.77758
1221.07				438	0.779359
1225.29				439	0.781139
1226.64				440	0.782918
1235.05				441	0.784698
1235.72				442	0.786477
1240.99				443	0.788256
1246.22				444	0.790036
1246.27				445	0.791815
1252.58				446	0.793594
1253.87				447	0.795374
1253.93				448	0.797153
1256.32				449	0.798932
1257.27				450	0.800712
1257.64				451	0.802491
1258.92				452	0.80427
1260.44				453	0.80605
1263.83				454	0.807829
1270.75				455	0.809609
1276.83				456	0.811388
1277.44				457	0.813167
1279.11				458	0.814947
1279.29				459	0.816726
1280.16				460	0.818505
1281.88				461	0.820285
1282.93				462	0.822064
1289.85				463	0.823843
1291.24				464	0.825623
1293.78				465	0.827402
1295.47				466	0.829181
1299.34				467	0.830961
1302.16				468	0.83274
1302.65				469	0.83452
1306.44				470	0.836299
1307.57				471	0.838078
1310.08				472	0.839858
1310.61				473	0.841637
1313.77				474	0.843416
1317.51				475	0.845196
1318.6				476	0.846975
1319.71				477	0.848754
1322.56				478	0.850534
1322.77				479	0.852313
1329.98				480	0.854093
1336.99				481	0.855872
1337.12				482	0.857651
1339.67				483	0.859431
1345.46				484	0.86121
1353.84				485	0.862989
1355.74				486	0.864769
1358.56				487	0.866548
1361.76				488	0.868327
1362.11				489	0.870107
1362.54				490	0.871886
1362.95				491	0.873665
1364.15				492	0.875445
1364.38				493	0.877224
1372.02				494	0.879004
1374.02				495	0.880783
1374.23				496	0.882562
1379.27				497	0.884342
1380.88				498	0.886121
1381.4				499	0.8879
1382.92				500	0.88968
1385.83				501	0.891459
1389.46				502	0.893238
1392.65				503	0.895018
1397.14				504	0.896797
1397.82				505	0.898577
1399.21				506	0.900356
1403.22				507	0.902135
1408.76				508	0.903915
1417.51				509	0.905694
1421.16				510	0.907473
1431.67				511	0.909253
1433.23				512	0.911032
1436.83				513	0.912811
1438.12				514	0.914591
1438.81				515	0.91637
1447.68				516	0.918149
1452.27				517	0.919929
1453.98				518	0.921708
1465.87				519	0.923488
1469.38				520	0.925267
1470.53				521	0.927046
1477.76				522	0.928826
1478.97				523	0.930605
1482.33				524	0.932384
1492.11				525	0.934164
1492.78				526	0.935943
1500.52				527	0.937722
1509.56				528	0.939502
1511.02				529	0.941281
1512.34				530	0.94306
1527.98				531	0.94484
1534.51				532	0.946619
1536.2				533	0.948399
1540.76				534	0.950178
1541.64				535	0.951957
1547.45				536	0.953737
1550.77				537	0.955516
1553.89				538	0.957295
1554.65				539	0.959075
1557.48				540	0.960854
1558.5				541	0.962633
1562.46				542	0.964413
1595.53				543	0.966192
1597.42				544	0.967972
1604.83				545	0.969751
1606.14				546	0.97153
1626.88				547	0.97331
1627.3				548	0.975089
1646.55				549	0.976868
1669.28				550	0.978648
1670.89				551	0.980427
1682.24				552	0.982206
1728.82				553	0.983986
1776.81				554	0.985765
1783.7				555	0.987544
1837.55				556	0.989324
1859.03				557	0.991103
1871.49				558	0.992883
1930.98				559	0.994662
1932.47				560	0.996441
1991.02				561	0.998221
2018.99				562	1

## Sheet: Fig 7C
K234E
20	70	0 Ca			Cum. Prob. 20	Cum. Prob. 70	Cum. Prob. 0 Ca
142.173	330.864	682.158		1	0.00309598	0.00277778	0.00318471
219.635	395.741	691.02		2	0.00619195	0.00555556	0.00636943
273.93	448.282	731.534		3	0.00928793	0.00833333	0.00955414
305.974	460.927	773.909		4	0.0123839	0.0111111	0.0127389
350.865	480.676	811.936		5	0.0154799	0.0138889	0.0159236
389.171	511.747	832.317		6	0.0185759	0.0166667	0.0191083
427.988	512.758	851.096		7	0.0216718	0.0194444	0.022293
436.63	531.855	906.037		8	0.0247678	0.0222222	0.0254777
445.164	559.123	908.589		9	0.0278638	0.025	0.0286624
475.479	633.005	919.585		10	0.0309598	0.0277778	0.0318471
487.859	639.679	949.294		11	0.0340557	0.0305556	0.0350318
496.667	679.297	967.429		12	0.0371517	0.0333333	0.0382166
515.093	712.856	969.849		13	0.0402477	0.0361111	0.0414013
516.562	720.082	1031.13		14	0.0433437	0.0388889	0.044586
547.052	720.944	1045.54		15	0.0464396	0.0416667	0.0477707
563.988	737.527	1067.18		16	0.0495356	0.0444444	0.0509554
564.835	763.608	1068.37		17	0.0526316	0.0472222	0.0541401
572.999	764.122	1077.6		18	0.0557276	0.05	0.0573248
579.442	776.669	1098.02		19	0.0588235	0.0527778	0.0605096
583.483	821.595	1101.04		20	0.0619195	0.0555556	0.0636943
583.926	822.018	1125.72		21	0.0650155	0.0583333	0.066879
596.514	832.286	1146.79		22	0.0681115	0.0611111	0.0700637
597.061	841.839	1147.7		23	0.0712074	0.0638889	0.0732484
600.317	846.733	1170.87		24	0.0743034	0.0666667	0.0764331
616.034	847.239	1195.15		25	0.0773994	0.0694444	0.0796178
616.576	855.731	1202.55		26	0.0804954	0.0722222	0.0828025
625.605	857.021	1221.44		27	0.0835913	0.075	0.0859873
635.156	871.257	1232.66		28	0.0866873	0.0777778	0.089172
643.564	892.097	1267.43		29	0.0897833	0.0805556	0.0923567
654.041	911.532	1283.23		30	0.0928793	0.0833333	0.0955414
664.432	924.206	1287.83		31	0.0959752	0.0861111	0.0987261
675.744	942.705	1296.1		32	0.0990712	0.0888889	0.101911
677.218	961.164	1298.98		33	0.102167	0.0916667	0.105096
682.787	980.887	1305.9		34	0.105263	0.0944444	0.10828
687.286	981.795	1314.73		35	0.108359	0.0972222	0.111465
694.868	987.431	1335.17		36	0.111455	0.1	0.11465
715.137	988.419	1353.09		37	0.114551	0.102778	0.117834
719.469	1007.41	1359.18		38	0.117647	0.105556	0.121019
721.803	1012.98	1375.61		39	0.120743	0.108333	0.124204
727.747	1019.11	1386.42		40	0.123839	0.111111	0.127389
729.288	1023.23	1391.79		41	0.126935	0.113889	0.130573
741.35	1032.37	1430.81		42	0.130031	0.116667	0.133758
750.85	1033.06	1452.4		43	0.133127	0.119444	0.136943
751.069	1033.65	1474.96		44	0.136223	0.122222	0.140127
751.447	1042.73	1478.42		45	0.139319	0.125	0.143312
764.271	1043.99	1483.96		46	0.142415	0.127778	0.146497
769.812	1044.82	1522.8		47	0.145511	0.130556	0.149682
769.928	1051.89	1526.85		48	0.148607	0.133333	0.152866
777.475	1060.5	1528.23		49	0.151703	0.136111	0.156051
779.311	1079.96	1534.86		50	0.154799	0.138889	0.159236
780.247	1081.23	1537.47		51	0.157895	0.141667	0.16242
789.725	1091.73	1554.29		52	0.160991	0.144444	0.165605
794.072	1094.6	1602.12		53	0.164087	0.147222	0.16879
794.67	1094.69	1603.73		54	0.167183	0.15	0.171975
803.207	1105.22	1628.05		55	0.170279	0.152778	0.175159
804.225	1114.42	1628.21		56	0.173375	0.155556	0.178344
810.51	1115.11	1637.52		57	0.176471	0.158333	0.181529
814.395	1119.81	1645.77		58	0.179567	0.161111	0.184713
817.726	1128.52	1651.28		59	0.182663	0.163889	0.187898
831.944	1143.06	1665.33		60	0.185759	0.166667	0.191083
835.447	1165.21	1665.35		61	0.188854	0.169444	0.194268
836.474	1165.3	1667.95		62	0.19195	0.172222	0.197452
844.876	1166.58	1670.13		63	0.195046	0.175	0.200637
845.511	1169.79	1681.61		64	0.198142	0.177778	0.203822
845.849	1178.19	1692.78		65	0.201238	0.180556	0.207006
850.185	1185.85	1720.26		66	0.204334	0.183333	0.210191
851.49	1196.99	1724.37		67	0.20743	0.186111	0.213376
854.212	1199.34	1724.68		68	0.210526	0.188889	0.216561
868.752	1200.89	1743.38		69	0.213622	0.191667	0.219745
871.22	1221.93	1749.35		70	0.216718	0.194444	0.22293
876.68	1222.89	1768.64		71	0.219814	0.197222	0.226115
879.807	1223.32	1776.74		72	0.22291	0.2	0.229299
882.736	1226.85	1786.06		73	0.226006	0.202778	0.232484
887.774	1242.06	1802.05		74	0.229102	0.205556	0.235669
890.421	1249.54	1813.35		75	0.232198	0.208333	0.238854
902.957	1269.31	1825.78		76	0.235294	0.211111	0.242038
903.495	1273	1827.47		77	0.23839	0.213889	0.245223
905.086	1276.44	1841.81		78	0.241486	0.216667	0.248408
909.647	1300.81	1851.15		79	0.244582	0.219444	0.251592
910.412	1301.01	1855.7		80	0.247678	0.222222	0.254777
911.895	1326.13	1862.27		81	0.250774	0.225	0.257962
915.246	1326.21	1869.32		82	0.25387	0.227778	0.261146
915.996	1330.11	1880.99		83	0.256966	0.230556	0.264331
917.009	1333.93	1881.39		84	0.260062	0.233333	0.267516
917.184	1338.94	1897.9		85	0.263158	0.236111	0.270701
932.507	1339.62	1902.81		86	0.266254	0.238889	0.273885
933.083	1340.39	1908.71		87	0.26935	0.241667	0.27707
934.356	1341.01	1917.51		88	0.272446	0.244444	0.280255
949.973	1343.91	1927.92		89	0.275542	0.247222	0.283439
957.235	1352.51	1948.68		90	0.278638	0.25	0.286624
978.755	1363.18	1951.11		91	0.281734	0.252778	0.289809
981.2	1376.41	1954.45		92	0.28483	0.255556	0.292994
985.531	1381.32	1979.5		93	0.287926	0.258333	0.296178
986.092	1385.99	1986.06		94	0.291022	0.261111	0.299363
986.725	1404.1	1986.85		95	0.294118	0.263889	0.302548
988.843	1412.77	1995.02		96	0.297214	0.266667	0.305732
991.725	1426.81	2019.54		97	0.30031	0.269444	0.308917
1001.66	1426.88	2034.37		98	0.303406	0.272222	0.312102
1002.19	1431.48	2035.25		99	0.306502	0.275	0.315287
1005.1	1431.96	2037.81		100	0.309598	0.277778	0.318471
1006.69	1438.12	2043.43		101	0.312693	0.280556	0.321656
1007.79	1440.98	2047.77		102	0.315789	0.283333	0.324841
1010.74	1454.85	2058.9		103	0.318885	0.286111	0.328025
1011.17	1460.51	2073.76		104	0.321981	0.288889	0.33121
1015.83	1460.69	2081.34		105	0.325077	0.291667	0.334395
1016.1	1467.64	2082.7		106	0.328173	0.294444	0.33758
1023.98	1470.09	2084.23		107	0.331269	0.297222	0.340764
1040.71	1472.97	2085.4		108	0.334365	0.3	0.343949
1041.12	1473.86	2088.93		109	0.337461	0.302778	0.347134
1046.37	1476.37	2105.36		110	0.340557	0.305556	0.350318
1057.53	1483.25	2110.29		111	0.343653	0.308333	0.353503
1060.06	1486.25	2112.21		112	0.346749	0.311111	0.356688
1063.23	1487.01	2134.34		113	0.349845	0.313889	0.359873
1066.29	1518.76	2151.98		114	0.352941	0.316667	0.363057
1067.16	1520.55	2158.5		115	0.356037	0.319444	0.366242
1068.93	1523.67	2159.95		116	0.359133	0.322222	0.369427
1070.35	1525.73	2164.63		117	0.362229	0.325	0.372611
1073.6	1526.9	2164.77		118	0.365325	0.327778	0.375796
1074.54	1542.75	2171.03		119	0.368421	0.330556	0.378981
1079.03	1544.82	2177.27		120	0.371517	0.333333	0.382166
1079.95	1551.33	2188.25		121	0.374613	0.336111	0.38535
1083.2	1565.4	2191.18		122	0.377709	0.338889	0.388535
1089.41	1569.55	2192.93		123	0.380805	0.341667	0.39172
1095.55	1573.01	2202.2		124	0.383901	0.344444	0.394904
1097.36	1584.73	2222.97		125	0.386997	0.347222	0.398089
1102.07	1590.54	2223.68		126	0.390093	0.35	0.401274
1102.71	1601.89	2225.59		127	0.393189	0.352778	0.404459
1118.42	1602.59	2232.55		128	0.396285	0.355556	0.407643
1118.73	1603.2	2233.45		129	0.399381	0.358333	0.410828
1122.09	1604.02	2234.38		130	0.402477	0.361111	0.414013
1123.39	1605.14	2238.15		131	0.405573	0.363889	0.417197
1141.44	1609.94	2248.71		132	0.408669	0.366667	0.420382
1148.96	1610.58	2248.73		133	0.411765	0.369444	0.423567
1156.71	1612.84	2254.55		134	0.414861	0.372222	0.426752
1156.74	1618.42	2259.05		135	0.417957	0.375	0.429936
1156.89	1627.97	2259.57		136	0.421053	0.377778	0.433121
1157.66	1628.34	2268.18		137	0.424149	0.380556	0.436306
1164.74	1631.56	2283.4		138	0.427245	0.383333	0.43949
1170.09	1641.03	2288.09		139	0.430341	0.386111	0.442675
1172.58	1645.18	2308.05		140	0.433437	0.388889	0.44586
1174.3	1651.45	2311.08		141	0.436533	0.391667	0.449045
1175.13	1651.63	2312.57		142	0.439628	0.394444	0.452229
1179.54	1652.86	2319.96		143	0.442724	0.397222	0.455414
1189.15	1661.64	2322.84		144	0.44582	0.4	0.458599
1194.92	1661.89	2327.19		145	0.448916	0.402778	0.461783
1194.98	1672.09	2340.48		146	0.452012	0.405556	0.464968
1198.26	1678.66	2363.73		147	0.455108	0.408333	0.468153
1198.9	1687.77	2366.42		148	0.458204	0.411111	0.471338
1209.87	1693.12	2366.87		149	0.4613	0.413889	0.474522
1212.19	1694.99	2369.21		150	0.464396	0.416667	0.477707
1213.82	1695.85	2370.32		151	0.467492	0.419444	0.480892
1224.87	1700.14	2377.99		152	0.470588	0.422222	0.484076
1228.67	1704.26	2384.74		153	0.473684	0.425	0.487261
1232.81	1707.93	2395.55		154	0.47678	0.427778	0.490446
1233.97	1714.78	2396.28		155	0.479876	0.430556	0.493631
1235.25	1719.61	2406.9		156	0.482972	0.433333	0.496815
1236.27	1726.16	2423.47		157	0.486068	0.436111	0.5
1236.42	1736.58	2432.28		158	0.489164	0.438889	0.503185
1249.18	1737.23	2434.48		159	0.49226	0.441667	0.506369
1252.55	1744.91	2435.82		160	0.495356	0.444444	0.509554
1255.32	1751.41	2449.05		161	0.498452	0.447222	0.512739
1261.17	1753.56	2474.91		162	0.501548	0.45	0.515924
1285.41	1755.21	2484.56		163	0.504644	0.452778	0.519108
1290.35	1762.19	2515.89		164	0.50774	0.455556	0.522293
1296.2	1777.96	2516.98		165	0.510836	0.458333	0.525478
1298.62	1796.59	2521.8		166	0.513932	0.461111	0.528662
1307.66	1806	2527.95		167	0.517028	0.463889	0.531847
1317.96	1809.26	2530.46		168	0.520124	0.466667	0.535032
1318.16	1809.37	2548.39		169	0.52322	0.469444	0.538217
1326.87	1810.57	2577.19		170	0.526316	0.472222	0.541401
1331.95	1819.59	2583.09		171	0.529412	0.475	0.544586
1338.69	1822.79	2597.33		172	0.532508	0.477778	0.547771
1341.26	1834.15	2602.68		173	0.535604	0.480556	0.550955
1343.68	1838.8	2602.83		174	0.5387	0.483333	0.55414
1345.58	1849.36	2606.67		175	0.541796	0.486111	0.557325
1352.23	1856.12	2616.22		176	0.544892	0.488889	0.56051
1355.75	1859.45	2623.76		177	0.547988	0.491667	0.563694
1355.76	1860.02	2638.22		178	0.551084	0.494444	0.566879
1366.86	1861.64	2648.39		179	0.55418	0.497222	0.570064
1369.25	1863.82	2649.6		180	0.557276	0.5	0.573248
1370.81	1902.05	2653.49		181	0.560372	0.502778	0.576433
1386.68	1902.85	2655.68		182	0.563467	0.505556	0.579618
1387.71	1905.9	2661.75		183	0.566563	0.508333	0.582803
1407.17	1916.77	2680.67		184	0.569659	0.511111	0.585987
1409.78	1931.48	2680.82		185	0.572755	0.513889	0.589172
1411.05	1935.29	2686.57		186	0.575851	0.516667	0.592357
1411.78	1954.56	2692.2		187	0.578947	0.519444	0.595541
1419.32	1957.05	2716.1		188	0.582043	0.522222	0.598726
1422.87	1980.5	2721.08		189	0.585139	0.525	0.601911
1438.1	1999.98	2721.97		190	0.588235	0.527778	0.605096
1440.26	2010.66	2726.05		191	0.591331	0.530556	0.60828
1441.89	2013.22	2751.97		192	0.594427	0.533333	0.611465
1444.6	2017.32	2754.73		193	0.597523	0.536111	0.61465
1453.36	2038.3	2764.91		194	0.600619	0.538889	0.617834
1454.1	2055.34	2766.91		195	0.603715	0.541667	0.621019
1459.16	2056.53	2769.52		196	0.606811	0.544444	0.624204
1463.29	2066.61	2781.42		197	0.609907	0.547222	0.627389
1473.22	2070.64	2781.47		198	0.613003	0.55	0.630573
1478.62	2081.49	2784.3		199	0.616099	0.552778	0.633758
1481.72	2083.19	2785.39		200	0.619195	0.555556	0.636943
1499.19	2083.95	2799.39		201	0.622291	0.558333	0.640127
1504.48	2084.64	2801.45		202	0.625387	0.561111	0.643312
1509.81	2089.15	2803.03		203	0.628483	0.563889	0.646497
1511.77	2097.97	2809.69		204	0.631579	0.566667	0.649682
1515.19	2100.41	2809.83		205	0.634675	0.569444	0.652866
1518.94	2102.83	2821.94		206	0.637771	0.572222	0.656051
1522.09	2114.15	2835.51		207	0.640867	0.575	0.659236
1524.16	2124.39	2886.28		208	0.643963	0.577778	0.66242
1525.57	2138.31	2887.31		209	0.647059	0.580556	0.665605
1528.21	2147.05	2922.44		210	0.650155	0.583333	0.66879
1537.03	2148.11	2939.09		211	0.653251	0.586111	0.671975
1538.46	2150.41	2959.15		212	0.656347	0.588889	0.675159
1539.76	2153.56	2975.93		213	0.659443	0.591667	0.678344
1554.35	2157.7	2999.81		214	0.662539	0.594444	0.681529
1560.79	2169.34	3010.09		215	0.665635	0.597222	0.684713
1566.75	2172.88	3023.96		216	0.668731	0.6	0.687898
1570.23	2175.48	3057.38		217	0.671827	0.602778	0.691083
1570.6	2180.08	3075.58		218	0.674923	0.605556	0.694268
1581.56	2184.42	3077.82		219	0.678019	0.608333	0.697452
1595.03	2187.07	3082.18		220	0.681115	0.611111	0.700637
1604.48	2193.24	3083.88		221	0.684211	0.613889	0.703822
1607.52	2197.57	3085.1		222	0.687307	0.616667	0.707006
1621.71	2209.81	3090.81		223	0.690402	0.619444	0.710191
1630.4	2211.12	3093.89		224	0.693498	0.622222	0.713376
1632.44	2211.59	3102.58		225	0.696594	0.625	0.716561
1634.65	2223.82	3103.64		226	0.69969	0.627778	0.719745
1638.76	2229.31	3124.11		227	0.702786	0.630556	0.72293
1645.58	2230.16	3125.46		228	0.705882	0.633333	0.726115
1656.35	2234.63	3140.16		229	0.708978	0.636111	0.729299
1662.66	2254.28	3140.24		230	0.712074	0.638889	0.732484
1674.37	2255.53	3141.08		231	0.71517	0.641667	0.735669
1698.88	2263.34	3145.64		232	0.718266	0.644444	0.738854
1708.84	2263.47	3148.57		233	0.721362	0.647222	0.742038
1725.12	2269.24	3152.46		234	0.724458	0.65	0.745223
1739.66	2280.4	3160.05		235	0.727554	0.652778	0.748408
1741.8	2286.82	3168.37		236	0.73065	0.655556	0.751592
1743.92	2292.97	3193.25		237	0.733746	0.658333	0.754777
1747.42	2297.12	3195.4		238	0.736842	0.661111	0.757962
1751.45	2298.64	3200.16		239	0.739938	0.663889	0.761146
1761.42	2304.89	3222.61		240	0.743034	0.666667	0.764331
1767.92	2324.27	3235.13		241	0.74613	0.669444	0.767516
1786.71	2330.16	3245.02		242	0.749226	0.672222	0.770701
1791.59	2335.65	3258.88		243	0.752322	0.675	0.773885
1809.03	2342.78	3262.65		244	0.755418	0.677778	0.77707
1809.38	2352.49	3286.91		245	0.758514	0.680556	0.780255
1831.14	2389.17	3305		246	0.76161	0.683333	0.783439
1834.69	2391.51	3318.16		247	0.764706	0.686111	0.786624
1837.63	2393.87	3334.78		248	0.767802	0.688889	0.789809
1843.04	2398.77	3337.81		249	0.770898	0.691667	0.792994
1852.73	2401.05	3348.58		250	0.773994	0.694444	0.796178
1876.17	2419.69	3367.9		251	0.77709	0.697222	0.799363
1876.23	2420.89	3377.65		252	0.780186	0.7	0.802548
1882.91	2426.16	3411.96		253	0.783282	0.702778	0.805732
1884.3	2431.47	3473.51		254	0.786378	0.705556	0.808917
1916.79	2434.17	3476.18		255	0.789474	0.708333	0.812102
1923.62	2438.16	3501.6		256	0.79257	0.711111	0.815287
1927.54	2453.86	3508.26		257	0.795666	0.713889	0.818471
1941.92	2461.85	3527.9		258	0.798762	0.716667	0.821656
1950.08	2491.19	3554.2		259	0.801858	0.719444	0.824841
1954.03	2501.66	3577.36		260	0.804954	0.722222	0.828025
1962.61	2509.13	3580.18		261	0.80805	0.725	0.83121
1966.58	2520.88	3620.71		262	0.811146	0.727778	0.834395
1982.26	2523.09	3636.27		263	0.814241	0.730556	0.83758
1992.05	2545.26	3636.32		264	0.817337	0.733333	0.840764
1993.8	2557.31	3658.7		265	0.820433	0.736111	0.843949
1998.67	2559.61	3678		266	0.823529	0.738889	0.847134
2017.66	2580.86	3693.61		267	0.826625	0.741667	0.850318
2020.86	2589.19	3719.06		268	0.829721	0.744444	0.853503
2021.71	2590.05	3734.58		269	0.832817	0.747222	0.856688
2025.41	2600.11	3738.99		270	0.835913	0.75	0.859873
2048.95	2602.01	3756.15		271	0.839009	0.752778	0.863057
2078.97	2628.24	3773.09		272	0.842105	0.755556	0.866242
2083.36	2640.72	3788.3		273	0.845201	0.758333	0.869427
2093.16	2645.61	3789.97		274	0.848297	0.761111	0.872611
2108.89	2649.44	3811.24		275	0.851393	0.763889	0.875796
2125.07	2652.31	3833.33		276	0.854489	0.766667	0.878981
2130.54	2666.89	3834.24		277	0.857585	0.769444	0.882166
2142.99	2669.55	3846.2		278	0.860681	0.772222	0.88535
2144.22	2701.65	3869.05		279	0.863777	0.775	0.888535
2148.57	2717.24	3888.7		280	0.866873	0.777778	0.89172
2175.32	2722.14	3896		281	0.869969	0.780556	0.894904
2189.91	2722.16	3929.03		282	0.873065	0.783333	0.898089
2194.13	2766.3	4050.86		283	0.876161	0.786111	0.901274
2201.44	2766.44	4065.2		284	0.879257	0.788889	0.904459
2224.88	2768.52	4070.31		285	0.882353	0.791667	0.907643
2245.85	2773.14	4092.3		286	0.885449	0.794444	0.910828
2256.36	2780.44	4108.07		287	0.888545	0.797222	0.914013
2266.16	2783.85	4266.65		288	0.891641	0.8	0.917197
2266.26	2800.84	4362.35		289	0.894737	0.802778	0.920382
2267.06	2817.05	4365.86		290	0.897833	0.805556	0.923567
2290.65	2853.49	4370.98		291	0.900929	0.808333	0.926752
2293.99	2865.94	4458.91		292	0.904025	0.811111	0.929936
2313.17	2871.86	4460.97		293	0.907121	0.813889	0.933121
2322.84	2880.14	4463.46		294	0.910217	0.816667	0.936306
2324.51	2888.6	4478.8		295	0.913313	0.819444	0.93949
2401.65	2890.44	4504.55		296	0.916409	0.822222	0.942675
2407.29	2902.55	4540.76		297	0.919505	0.825	0.94586
2458.1	2903.88	4572.8		298	0.922601	0.827778	0.949045
2459.02	2908.65	4708.74		299	0.925697	0.830556	0.952229
2471.5	2920.42	4753.49		300	0.928793	0.833333	0.955414
2540.02	2965.78	4859.02		301	0.931889	0.836111	0.958599
2548.8	2983.77	4898.94		302	0.934985	0.838889	0.961783
2617.27	2996.68	5000.53		303	0.93808	0.841667	0.964968
2630.21	3014.76	5304.79		304	0.941176	0.844444	0.968153
2631.11	3021.03	5319.78		305	0.944272	0.847222	0.971338
2679.77	3022.84	5811.44		306	0.947368	0.85	0.974522
2806.75	3060.87	5936.51		307	0.950464	0.852778	0.977707
2892.52	3062.88	5939.92		308	0.95356	0.855556	0.980892
2915.22	3075.01	5963.1		309	0.956656	0.858333	0.984076
2946.28	3078.1	5968.15		310	0.959752	0.861111	0.987261
2985.18	3089.02	6019.94		311	0.962848	0.863889	0.990446
3069.99	3108.64	6106.77		312	0.965944	0.866667	0.993631
3127.89	3134.14	6585.41		313	0.96904	0.869444	0.996815
3130.1	3144.95	6662.47		314	0.972136	0.872222	1
3401.81	3153.89			315	0.975232	0.875
3420.35	3190.02			316	0.978328	0.877778
3469.12	3196.5			317	0.981424	0.880556
3483.55	3294.99			318	0.98452	0.883333
3516.44	3328.05			319	0.987616	0.886111
3663.83	3351.04			320	0.990712	0.888889
3701.43	3378.61			321	0.993808	0.891667
3779.75	3387.37			322	0.996904	0.894444
3802.69	3421.22			323	1	0.897222
	3434.25			324		0.9
	3455.53			325		0.902778
	3470.18			326		0.905556
	3488.4			327		0.908333
	3490.38			328		0.911111
	3502.78			329		0.913889
	3515.58			330		0.916667
	3536.32			331		0.919444
	3538.03			332		0.922222
	3544.05			333		0.925
	3636.01			334		0.927778
	3654.09			335		0.930556
	3679.04			336		0.933333
	3723.45			337		0.936111
	3723.88			338		0.938889
	3768.43			339		0.941667
	3818.02			340		0.944444
	3877.5			341		0.947222
	3883.53			342		0.95
	3910.09			343		0.952778
	3936.03			344		0.955556
	4045			345		0.958333
	4199.4			346		0.961111
	4250.54			347		0.963889
	4260.77			348		0.966667
	4332.25			349		0.969444
	4510.76			350		0.972222
	4588.73			351		0.975
	4645.81			352		0.977778
	4670.03			353		0.980556
	4734.97			354		0.983333
	4793.75			355		0.986111
	4817.19			356		0.988889
	4904.27			357		0.991667
	5104.1			358		0.994444
	5888.04			359		0.997222
	6022.45			360		1

## Sheet: Fig 7D
K105E 70	K105E 0Ca	K144E 70	K144E 0Ca	K234E 70	K234E 0Ca
10.9828	7.02039	0.314245	16.7078	10.9499	16.5017
7.70147	5.30101	0.78453	6.46369	-0.647905	7.73489
-1.59954	-0.3706	0.721995	16.8534	10.9837	7.28426
-1.32338	-0.31442	-1.76602	15.9191	4.37354	14.1508
-0.7306	0.855125	-0.57497	9.51093	5.57004	12.0446
