# Supplementary material for: CO2-dependent opening of connexin 43 hemichannels
Source: eLife. 2026 Jun 3;14:RP105989. doi: 10.7554/eLife.105989 (PMC13233067; doi:10.7554/eLife.105989)
Supplement: Figure 8—source data 1. [file elife-105989-fig8-data1.xlsx]

## Sheet: Fig 8A
K105E
55	KCl
-0.182763	2.63452
-0.0652991	2.80946
-0.0661183	3.32452
-1.49148	2.34535
-1.36275	3.12345
-1.31784	2.33246
-1.30629	2.46735
-0.447795	2.43674
0.202342	2.74356
0.00342316	2.43572
0.0471649	3.63424
-0.0810186	3.43212
-0.0668212	2.78435
0.249178	2.76545
0.301787	3.32546
0.06388	3.07583
0.0805793	3.24979
0.0591156	3.47694

## Sheet: Fig 8B
K144E
55	KCl
-0.144272	2.50283
-0.167509	2.35574
-0.136838	2.32574
-0.223177	2.37696
-0.600791	2.44522
-0.731527	2.40254
-0.560588	2.57361
-0.49835	2.67133
-0.59965	2.77608
0.0290314	2.95266
0.0198411	2.89184
0.01182	3.00958
0.01887	2.98592
-0.0357472	3.72689
0.167003	4.94315
-0.0860223	4.48437
-0.144073	3.54111

## Sheet: Fig 8C
K234E
55	KCl
0.0523177	4.03594
0.147809	3.45679
0.06388	3.07583
0.0805793	3.24979
0.121012	3.70778
0.0591156	3.47694
0.027192	2.94325
0.0453947	3.2604
0.033959	3.27983
0.0326488	3.31204
-0.0088034	3.39966
-0.00572318	3.30498
-0.000961122	3.4768
