# Supplementary material for: CO2-dependent opening of connexin 43 hemichannels
Source: eLife. 2026 Jun 3;14:RP105989. doi: 10.7554/eLife.105989 (PMC13233067; doi:10.7554/eLife.105989)
Supplement: Figure 9—source data 1. [file elife-105989-fig9-data1.xlsx]

## Sheet: Fig 9A
K105E K109E
20	70	0 Ca			Cum. Prob. 20	Cum. Prob. 70	Cum. Prob. 0 Ca
943.78	1168.71	889.931		1	0.00362319	0.00348432	0.002849
1090.01	1188.33	928.693		2	0.00724638	0.00696864	0.00569801
1152.71	1194.41	1080.06		3	0.0108696	0.010453	0.00854701
1179.37	1215.76	1124.62		4	0.0144928	0.0139373	0.011396
1231.81	1262.13	1167.53		5	0.0181159	0.0174216	0.014245
1288.22	1283.3	1168.18		6	0.0217391	0.0209059	0.017094
1314.16	1289.31	1194.74		7	0.0253623	0.0243902	0.019943
1327.13	1338.83	1208.58		8	0.0289855	0.0278746	0.022792
1341.44	1368.42	1252.07		9	0.0326087	0.0313589	0.025641
1372.18	1387.21	1283.05		10	0.0362319	0.0348432	0.02849
1381.56	1387.35	1326.76		11	0.0398551	0.0383275	0.031339
1467.8	1389.16	1331.31		12	0.0434783	0.0418118	0.034188
1487.51	1393.34	1348.72		13	0.0471014	0.0452962	0.037037
1494.97	1419.49	1379.75		14	0.0507246	0.0487805	0.039886
1505.12	1431.1	1396.52		15	0.0543478	0.0522648	0.042735
1511.81	1471.78	1397.68		16	0.057971	0.0557491	0.045584
1514.67	1476.04	1420.62		17	0.0615942	0.0592334	0.048433
1528	1480.41	1471.09		18	0.0652174	0.0627178	0.0512821
1528.29	1500.6	1471.41		19	0.0688406	0.0662021	0.0541311
1564.7	1515.63	1482.34		20	0.0724638	0.0696864	0.0569801
1571.97	1565.07	1482.55		21	0.076087	0.0731707	0.0598291
1585.03	1568.48	1530.55		22	0.0797101	0.0766551	0.0626781
1585.71	1569.31	1535.84		23	0.0833333	0.0801394	0.0655271
1636.92	1597.54	1568.54		24	0.0869565	0.0836237	0.0683761
1643.11	1656.38	1614.09		25	0.0905797	0.087108	0.0712251
1648.11	1657.77	1618.34		26	0.0942029	0.0905923	0.0740741
1687.59	1681.24	1635.84		27	0.0978261	0.0940767	0.0769231
1705.07	1694.49	1666.28		28	0.101449	0.097561	0.0797721
1714.21	1732.66	1672.76		29	0.105072	0.101045	0.0826211
1722.88	1743.3	1703.1		30	0.108696	0.10453	0.0854701
1743.76	1746.09	1727.02		31	0.112319	0.108014	0.0883191
1763.36	1748.2	1727.22		32	0.115942	0.111498	0.0911681
1764.14	1759.83	1740.66		33	0.119565	0.114983	0.0940171
1764.71	1797.6	1755.15		34	0.123188	0.118467	0.0968661
1778.34	1812.71	1760.86		35	0.126812	0.121951	0.0997151
1844.93	1815.02	1766.97		36	0.130435	0.125436	0.102564
1862.8	1848.52	1767.5		37	0.134058	0.12892	0.105413
1881.12	1856.88	1771.63		38	0.137681	0.132404	0.108262
1882.95	1865.07	1774.54		39	0.141304	0.135889	0.111111
1942.31	1872.94	1774.86		40	0.144928	0.139373	0.11396
1958.23	1881.48	1774.86		41	0.148551	0.142857	0.116809
1962.55	1882.63	1775.86		42	0.152174	0.146341	0.119658
1965.03	1890.24	1811.68		43	0.155797	0.149826	0.122507
1967.65	1914.61	1832.03		44	0.15942	0.15331	0.125356
1967.82	1915.3	1910.47		45	0.163043	0.156794	0.128205
1972.19	1933.78	1914.63		46	0.166667	0.160279	0.131054
1992.97	1934.98	1923.81		47	0.17029	0.163763	0.133903
2004.31	1939.25	1924.1		48	0.173913	0.167247	0.136752
2012.52	1973.92	1926.34		49	0.177536	0.170732	0.139601
2016.17	1976.37	1934.2		50	0.181159	0.174216	0.14245
2034.46	1978.81	1938.11		51	0.184783	0.1777	0.145299
2075.93	2012.35	1948.03		52	0.188406	0.181185	0.148148
2081.74	2032.27	1959.88		53	0.192029	0.184669	0.150997
2090.66	2039.52	1962.9		54	0.195652	0.188153	0.153846
2091.4	2052.99	1967.89		55	0.199275	0.191638	0.156695
2093.62	2056.69	1978.39		56	0.202899	0.195122	0.159544
2096.76	2063.49	1994.53		57	0.206522	0.198606	0.162393
2097.55	2088.45	1996.2		58	0.210145	0.202091	0.165242
2098.71	2096.03	2001.32		59	0.213768	0.205575	0.168091
2099.04	2111.84	2043.46		60	0.217391	0.209059	0.17094
2101.11	2137.32	2048.38		61	0.221014	0.212544	0.173789
2112.43	2141.37	2057.5		62	0.224638	0.216028	0.176638
2113.24	2142.05	2064.02		63	0.228261	0.219512	0.179487
2120.95	2166.05	2072.32		64	0.231884	0.222997	0.182336
2121.05	2177.78	2079.07		65	0.235507	0.226481	0.185185
2133.36	2182.04	2091.44		66	0.23913	0.229965	0.188034
2136.51	2198.71	2098.01		67	0.242754	0.233449	0.190883
2149.93	2221.66	2110.06		68	0.246377	0.236934	0.193732
2150.44	2242.35	2117.91		69	0.25	0.240418	0.196581
2153.34	2242.4	2117.91		70	0.253623	0.243902	0.19943
2166.25	2251.27	2121.02		71	0.257246	0.247387	0.202279
2176.28	2254.18	2129.89		72	0.26087	0.250871	0.205128
2213.63	2260.28	2154.2		73	0.264493	0.254355	0.207977
2217.36	2265.11	2158.34		74	0.268116	0.25784	0.210826
2225.74	2293.97	2159.64		75	0.271739	0.261324	0.213675
2230.16	2294.32	2164.18		76	0.275362	0.264808	0.216524
2236.51	2297.63	2167.46		77	0.278986	0.268293	0.219373
2240.09	2306.73	2168.12		78	0.282609	0.271777	0.222222
2270.38	2307.93	2177.05		79	0.286232	0.275261	0.225071
2270.72	2316.57	2186.06		80	0.289855	0.278746	0.22792
2271.12	2318.77	2211.28		81	0.293478	0.28223	0.230769
2279.07	2325.78	2219.72		82	0.297101	0.285714	0.233618
2281.71	2326.29	2221.9		83	0.300725	0.289199	0.236467
2283.05	2326.42	2225.19		84	0.304348	0.292683	0.239316
2296.05	2340.03	2249.91		85	0.307971	0.296167	0.242165
2299.26	2356.38	2252.49		86	0.311594	0.299652	0.245014
2313.56	2357.24	2261.07		87	0.315217	0.303136	0.247863
2315.4	2357.35	2269.01		88	0.318841	0.30662	0.250712
2321.86	2364.23	2273.21		89	0.322464	0.310105	0.253561
2325.13	2366.58	2284.7		90	0.326087	0.313589	0.25641
2330.61	2402.47	2293.94		91	0.32971	0.317073	0.259259
2353.75	2405.5	2303.03		92	0.333333	0.320557	0.262108
2355.57	2418.78	2308.89		93	0.336957	0.324042	0.264957
2366.02	2430.73	2317.61		94	0.34058	0.327526	0.267806
2378.65	2465.29	2327.21		95	0.344203	0.33101	0.270655
2383.88	2471.57	2365.93		96	0.347826	0.334495	0.273504
2383.9	2485.24	2371.62		97	0.351449	0.337979	0.276353
2433.14	2499.81	2393.77		98	0.355072	0.341463	0.279202
2441.6	2522.77	2396.61		99	0.358696	0.344948	0.282051
2461.31	2528.99	2397.7		100	0.362319	0.348432	0.2849
2464.81	2552.49	2423.31		101	0.365942	0.351916	0.287749
2471.74	2561.77	2423.75		102	0.369565	0.355401	0.290598
2475.84	2562.78	2426.23		103	0.373188	0.358885	0.293447
2483.14	2567.48	2428.51		104	0.376812	0.362369	0.296296
2485.73	2567.67	2430.75		105	0.380435	0.365854	0.299145
2487.54	2572.49	2432.38		106	0.384058	0.369338	0.301994
2492.1	2584.36	2435.93		107	0.387681	0.372822	0.304843
2498.99	2593.98	2440.48		108	0.391304	0.376307	0.307692
2506.72	2603.62	2452.47		109	0.394928	0.379791	0.310541
2507.29	2621.94	2455.41		110	0.398551	0.383275	0.31339
2522.86	2623.21	2464.27		111	0.402174	0.38676	0.316239
2524.5	2623.78	2464.29		112	0.405797	0.390244	0.319088
2536.78	2623.91	2486.42		113	0.40942	0.393728	0.321937
2537.33	2648.49	2512.84		114	0.413043	0.397213	0.324786
2544.11	2652.52	2525.79		115	0.416667	0.400697	0.327635
2551.86	2655.02	2526.81		116	0.42029	0.404181	0.330484
2582.1	2655.39	2532.8		117	0.423913	0.407666	0.333333
2587.36	2668.05	2548.34		118	0.427536	0.41115	0.336182
2593.1	2674.28	2573.56		119	0.431159	0.414634	0.339031
2598.39	2681.12	2580.14		120	0.434783	0.418118	0.34188
2604.04	2682.24	2592.3		121	0.438406	0.421603	0.344729
2626.27	2691.13	2610.73		122	0.442029	0.425087	0.347578
2629.28	2705.24	2631.85		123	0.445652	0.428571	0.350427
2635.51	2707.33	2658.16		124	0.449275	0.432056	0.353276
2649.57	2708.37	2661.98		125	0.452899	0.43554	0.356125
2659	2712.04	2664.72		126	0.456522	0.439024	0.358974
2660.91	2724.6	2669.29		127	0.460145	0.442509	0.361823
2666.28	2725.11	2679.49		128	0.463768	0.445993	0.364672
2666.9	2728.92	2688.88		129	0.467391	0.449477	0.367521
2672.22	2749.21	2698.92		130	0.471014	0.452962	0.37037
2687.22	2757.47	2704.91		131	0.474638	0.456446	0.373219
2694.64	2773.61	2709.74		132	0.478261	0.45993	0.376068
2699.84	2778.8	2710.91		133	0.481884	0.463415	0.378917
2717.34	2783.07	2723.52		134	0.485507	0.466899	0.381766
2731.14	2783.17	2729.25		135	0.48913	0.470383	0.384615
2736.42	2783.4	2729.76		136	0.492754	0.473868	0.387464
2749.47	2788.53	2743.11		137	0.496377	0.477352	0.390313
2750.42	2789.84	2754.32		138	0.5	0.480836	0.393162
2752.59	2794.89	2784.8		139	0.503623	0.484321	0.396011
2766.44	2795.67	2821.66		140	0.507246	0.487805	0.39886
2766.66	2805.32	2826.24		141	0.51087	0.491289	0.401709
2774.37	2806.58	2839.45		142	0.514493	0.494774	0.404558
2775.36	2815.39	2844.71		143	0.518116	0.498258	0.407407
2778.45	2818.75	2846.8		144	0.521739	0.501742	0.410256
2778.77	2830.44	2846.92		145	0.525362	0.505226	0.413105
2812.69	2832.89	2850.07		146	0.528986	0.508711	0.415954
2814.97	2842.45	2860.04		147	0.532609	0.512195	0.418803
2854.49	2849.54	2860.51		148	0.536232	0.515679	0.421652
2866.03	2856.26	2865.4		149	0.539855	0.519164	0.424501
2895.47	2875.22	2873.46		150	0.543478	0.522648	0.42735
2911.2	2876.65	2879.24		151	0.547101	0.526132	0.430199
2936.36	2890.11	2881.3		152	0.550725	0.529617	0.433048
2940.16	2895.72	2905.08		153	0.554348	0.533101	0.435897
2943.47	2900.8	2909.42		154	0.557971	0.536585	0.438746
2950.19	2910.37	2909.8		155	0.561594	0.54007	0.441595
2962.4	2920.39	2912.59		156	0.565217	0.543554	0.444444
2994.66	2921.67	2937.14		157	0.568841	0.547038	0.447293
2995.35	2926.7	2955.5		158	0.572464	0.550523	0.450142
2996.32	2930.51	2963.34		159	0.576087	0.554007	0.452991
2999.43	2934.13	2988.66		160	0.57971	0.557491	0.45584
3003.32	2936.8	2992.99		161	0.583333	0.560976	0.458689
3006.34	2938.91	2995.83		162	0.586957	0.56446	0.461538
3008.26	2939.08	3001.08		163	0.59058	0.567944	0.464387
3009.6	2940.64	3005.18		164	0.594203	0.571429	0.467236
3014.62	2957.8	3014.73		165	0.597826	0.574913	0.470085
3020.91	2965.1	3019.58		166	0.601449	0.578397	0.472934
3030.54	2981.73	3023.47		167	0.605072	0.581882	0.475783
3047.08	2989.54	3040.34		168	0.608696	0.585366	0.478632
3083.85	3000.8	3044.68		169	0.612319	0.58885	0.481481
3111.07	3023.01	3044.82		170	0.615942	0.592334	0.48433
3115.62	3053.84	3051.57		171	0.619565	0.595819	0.487179
3119.86	3054.98	3071.56		172	0.623188	0.599303	0.490028
3123.61	3056.92	3073.88		173	0.626812	0.602787	0.492877
3139.65	3078.93	3076.34		174	0.630435	0.606272	0.495726
3140.41	3079.95	3082.71		175	0.634058	0.609756	0.498575
3149.08	3109.08	3090.79		176	0.637681	0.61324	0.501425
3149.98	3137.07	3093.49		177	0.641304	0.616725	0.504274
3153.93	3157.28	3102.06		178	0.644928	0.620209	0.507123
3160.68	3161.43	3120.96		179	0.648551	0.623693	0.509972
3162.98	3176.42	3128.5		180	0.652174	0.627178	0.512821
3163.11	3184.4	3129.62		181	0.655797	0.630662	0.51567
3164.81	3209.88	3148.31		182	0.65942	0.634146	0.518519
3174.28	3211.18	3148.73		183	0.663043	0.637631	0.521368
3177.62	3217.84	3175.14		184	0.666667	0.641115	0.524217
3185.55	3222.13	3179.81		185	0.67029	0.644599	0.527066
3188.78	3231.47	3182.84		186	0.673913	0.648084	0.529915
3190.61	3232.59	3185.01		187	0.677536	0.651568	0.532764
3200.39	3233.46	3220.09		188	0.681159	0.655052	0.535613
3232.33	3235.38	3225.98		189	0.684783	0.658537	0.538462
3233.08	3256.2	3233.71		190	0.688406	0.662021	0.541311
3234.31	3256.25	3239.95		191	0.692029	0.665505	0.54416
3251.79	3263.48	3249.67		192	0.695652	0.66899	0.547009
3265.74	3263.71	3258.11		193	0.699275	0.672474	0.549858
3269.38	3266.99	3258.89		194	0.702899	0.675958	0.552707
3273.02	3285.38	3259.84		195	0.706522	0.679443	0.555556
3299.87	3286.29	3264.7		196	0.710145	0.682927	0.558405
3308.68	3297.29	3265.51		197	0.713768	0.686411	0.561254
3322.81	3303.89	3270.74		198	0.717391	0.689895	0.564103
3342.33	3304.97	3273.46		199	0.721014	0.69338	0.566952
3344.4	3305.9	3274.65		200	0.724638	0.696864	0.569801
3347.54	3329.57	3291.89		201	0.728261	0.700348	0.57265
3354.68	3329.83	3321.47		202	0.731884	0.703833	0.575499
3357.24	3334.79	3322.45		203	0.735507	0.707317	0.578348
3360.63	3346.28	3331.3		204	0.73913	0.710801	0.581197
3365.47	3347.97	3334.46		205	0.742754	0.714286	0.584046
3382.37	3353.37	3345.4		206	0.746377	0.71777	0.586895
3398.15	3359.92	3348.72		207	0.75	0.721254	0.589744
3404.89	3363.87	3385.54		208	0.753623	0.724739	0.592593
3412.9	3385.98	3407.16		209	0.757246	0.728223	0.595442
3440.31	3386.35	3449.24		210	0.76087	0.731707	0.598291
3441.99	3397.28	3459.44		211	0.764493	0.735192	0.60114
3465.86	3418.91	3461.77		212	0.768116	0.738676	0.603989
3489.17	3438.93	3502.61		213	0.771739	0.74216	0.606838
3516.59	3450.09	3515.07		214	0.775362	0.745645	0.609687
3534.87	3466.85	3526.24		215	0.778986	0.749129	0.612536
3537.36	3493.11	3541.33		216	0.782609	0.752613	0.615385
3539.84	3505.4	3545.8		217	0.786232	0.756098	0.618234
3582.28	3510.9	3564.64		218	0.789855	0.759582	0.621083
3606.3	3515.42	3564.8		219	0.793478	0.763066	0.623932
3618.97	3528.4	3570.1		220	0.797101	0.766551	0.626781
3628.98	3554.49	3585.86		221	0.800725	0.770035	0.62963
3655.42	3556.3	3591.32		222	0.804348	0.773519	0.632479
3707.03	3568.47	3607.32		223	0.807971	0.777003	0.635328
3713.19	3575.46	3609.71		224	0.811594	0.780488	0.638177
3714.83	3596.86	3616.18		225	0.815217	0.783972	0.641026
3722.76	3602.48	3626.58		226	0.818841	0.787456	0.643875
3741.25	3610.66	3637.04		227	0.822464	0.790941	0.646724
3749.58	3637.97	3649.81		228	0.826087	0.794425	0.649573
3784.22	3653.4	3660.29		229	0.82971	0.797909	0.652422
3784.75	3694.84	3662.47		230	0.833333	0.801394	0.655271
3797.41	3697.3	3673.09		231	0.836957	0.804878	0.65812
3827.98	3752.31	3722.9		232	0.84058	0.808362	0.660969
3830.62	3755.76	3742.83		233	0.844203	0.811847	0.663818
3838.91	3759.41	3745.94		234	0.847826	0.815331	0.666667
3859.95	3784.03	3746.86		235	0.851449	0.818815	0.669516
3887.39	3812.91	3753.84		236	0.855072	0.8223	0.672365
3894.9	3849.19	3761.89		237	0.858696	0.825784	0.675214
3895.37	3860.81	3776.43		238	0.862319	0.829268	0.678063
3896.11	3867.48	3785.64		239	0.865942	0.832753	0.680912
3913.98	3869.37	3814.68		240	0.869565	0.836237	0.683761
3925.56	3911.44	3816.06		241	0.873188	0.839721	0.68661
3952.99	3922.82	3829.17		242	0.876812	0.843206	0.689459
3958.84	3941.16	3841.65		243	0.880435	0.84669	0.692308
3964.44	3943.12	3849.4		244	0.884058	0.850174	0.695157
3977.91	3959.13	3850.16		245	0.887681	0.853659	0.698006
4013.05	3969.27	3854.31		246	0.891304	0.857143	0.700855
4013.71	3977.03	3860.5		247	0.894928	0.860627	0.703704
4019.52	3984.13	3879.22		248	0.898551	0.864111	0.706553
4019.84	4007.24	3894.62		249	0.902174	0.867596	0.709402
4032.6	4166.98	3906.17		250	0.905797	0.87108	0.712251
4045.8	4187.94	3921.7		251	0.90942	0.874564	0.7151
4067.56	4201.9	3925.39		252	0.913043	0.878049	0.717949
4086.68	4219.74	3933.37		253	0.916667	0.881533	0.720798
4100.49	4233.52	3937.33		254	0.92029	0.885017	0.723647
4171.47	4285.9	3944.86		255	0.923913	0.888502	0.726496
4177.28	4288.19	3951.35		256	0.927536	0.891986	0.729345
4192.53	4311.26	3953.42		257	0.931159	0.89547	0.732194
4196.53	4342.74	3971.1		258	0.934783	0.898955	0.735043
4198.77	4385.53	3989.66		259	0.938406	0.902439	0.737892
4269.67	4447.63	4002.79		260	0.942029	0.905923	0.740741
4285.33	4469.51	4015.55		261	0.945652	0.909408	0.74359
4313.37	4517.42	4032.97		262	0.949275	0.912892	0.746439
4327.87	4520.88	4049.9		263	0.952899	0.916376	0.749288
4387.3	4524.47	4073.86		264	0.956522	0.919861	0.752137
4436.83	4565.89	4087.33		265	0.960145	0.923345	0.754986
4473.19	4628.15	4102.76		266	0.963768	0.926829	0.757835
4483.23	4631.28	4142.44		267	0.967391	0.930314	0.760684
4492.3	4668.52	4151.46		268	0.971014	0.933798	0.763533
4526.22	4742.48	4151.49		269	0.974638	0.937282	0.766382
4624.35	4750.77	4166.88		270	0.978261	0.940767	0.769231
4760.03	4751.03	4172.61		271	0.981884	0.944251	0.77208
4793.07	4764.56	4193.8		272	0.985507	0.947735	0.774929
4833.1	4788.05	4197.98		273	0.98913	0.95122	0.777778
4857.02	4793.73	4211.92		274	0.992754	0.954704	0.780627
5052.36	4796.09	4215.25		275	0.996377	0.958188	0.783476
5687.81	4820.64	4228.53		276	1	0.961672	0.786325
	4928.03	4245.15		277		0.965157	0.789174
	5079.69	4245.56		278		0.968641	0.792023
	5180.44	4291.24		279		0.972125	0.794872
	5288.76	4306.07		280		0.97561	0.797721
	5288.77	4333.13		281		0.979094	0.80057
	5304.08	4355.02		282		0.982578	0.803419
	5340.26	4365.95		283		0.986063	0.806268
	5620.36	4387.57		284		0.989547	0.809117
	5632.26	4388.44		285		0.993031	0.811966
	5972.12	4395.24		286		0.996516	0.814815
	6859.3	4419.66		287		1	0.817664
		4464.77		288			0.820513
		4505.81		289			0.823362
		4534.26		290			0.826211
		4535.6		291			0.82906
		4536.28		292			0.831909
		4570		293			0.834758
		4571.6		294			0.837607
		4609.81		295			0.840456
		4680.86		296			0.843305
		4681.04		297			0.846154
		4725.65		298			0.849003
		4727.49		299			0.851852
		4754.27		300			0.854701
		4807.37		301			0.85755
		4809.4		302			0.860399
		4815.37		303			0.863248
		4886.81		304			0.866097
		4888.55		305			0.868946
		4891.24		306			0.871795
		4902.93		307			0.874644
		4919.45		308			0.877493
		4923.29		309			0.880342
		4936.19		310			0.883191
		4942.75		311			0.88604
		4943.18		312			0.888889
		4952.13		313			0.891738
		4967.24		314			0.894587
		4996.03		315			0.897436
		5031.72		316			0.900285
		5040.83		317			0.903134
		5041.99		318			0.905983
		5052.01		319			0.908832
		5065.95		320			0.911681
		5084.44		321			0.91453
		5093.61		322			0.917379
		5111.64		323			0.920228
		5158.63		324			0.923077
		5255.31		325			0.925926
		5262.01		326			0.928775
		5288.37		327			0.931624
		5314.64		328			0.934473
		5337.6		329			0.937322
		5364.21		330			0.940171
		5373.14		331			0.94302
		5433.35		332			0.945869
		5441.94		333			0.948718
		5513.07		334			0.951567
		5540.21		335			0.954416
		5628.78		336			0.957265
		5642.79		337			0.960114
		5798.12		338			0.962963
		5967.16		339			0.965812
		5990.23		340			0.968661
		6005.67		341			0.97151
		6054.34		342			0.974359
		6095.18		343			0.977208
		6300.8		344			0.980057
		6358.74		345			0.982906
		6422.52		346			0.985755
		6472.21		347			0.988604
		6606.11		348			0.991453
		6672.88		349			0.994302
		6766.89		350			0.997151
		6807.66		351			1

## Sheet: Fig 9B
K105E K109E
20 LaCl	20
281	826.921		1	0.000972763	0.000902527
304	929.124		2	0.00194553	0.00180505
373	1347.69		3	0.00291829	0.00270758
381	1386.11		4	0.00389105	0.00361011
444	1411.68		5	0.00486381	0.00451264
464	1527.26		6	0.00583658	0.00541516
467	1578.12		7	0.00680934	0.00631769
498	1585.64		8	0.0077821	0.00722022
547	1608.97		9	0.00875486	0.00812274
555	1625.95		10	0.00972763	0.00902527
555	1638.29		11	0.0107004	0.0099278
582.448	1645.79		12	0.0116732	0.0108303
633.279	1673.22		13	0.0126459	0.0117329
639	1678.72		14	0.0136187	0.0126354
690	1686.8		15	0.0145914	0.0135379
725	1696.76		16	0.0155642	0.0144404
740	1755.13		17	0.016537	0.015343
743.166	1758.95		18	0.0175097	0.0162455
808	1793.17		19	0.0184825	0.017148
810	1794.39		20	0.0194553	0.0180505
846	1800.37		21	0.020428	0.0189531
862	1805.14		22	0.0214008	0.0198556
866.552	1826.16		23	0.0223735	0.0207581
892.111	1852.15		24	0.0233463	0.0216606
909.926	1863.16		25	0.0243191	0.0225632
921	1868.92		26	0.0252918	0.0234657
927.678	1879.97		27	0.0262646	0.0243682
941	1887.91		28	0.0272374	0.0252708
952.043	1900.57		29	0.0282101	0.0261733
956	1901.53		30	0.0291829	0.0270758
959	1905.32		31	0.0301556	0.0279783
960.416	1910.36		32	0.0311284	0.0288809
975.386	1911.49		33	0.0321012	0.0297834
977.496	1926.44		34	0.0330739	0.0306859
991	1937.57		35	0.0340467	0.0315884
1000	1956.51		36	0.0350195	0.032491
1012.29	1957.49		37	0.0359922	0.0333935
1019	1959.03		38	0.036965	0.034296
1023	1968.26		39	0.0379377	0.0351986
1043.08	1978.4		40	0.0389105	0.0361011
1057.76	1978.89		41	0.0398833	0.0370036
1105	1979.04		42	0.040856	0.0379061
1105.58	1984.59		43	0.0418288	0.0388087
1108.45	1987.69		44	0.0428016	0.0397112
1120	1991.73		45	0.0437743	0.0406137
1133.25	1993.17		46	0.0447471	0.0415162
1138.71	1993.71		47	0.0457198	0.0424188
1141.79	2018.4		48	0.0466926	0.0433213
1151	2020.76		49	0.0476654	0.0442238
1151.84	2040.6		50	0.0486381	0.0451264
1153.37	2048.28		51	0.0496109	0.0460289
1158	2052.89		52	0.0505837	0.0469314
1162.86	2054.78		53	0.0515564	0.0478339
1164	2057		54	0.0525292	0.0487365
1171.23	2060.51		55	0.0535019	0.049639
1177	2065.51		56	0.0544747	0.0505415
1182.44	2071.13		57	0.0554475	0.051444
1185.02	2083.44		58	0.0564202	0.0523466
1196.31	2086.67		59	0.057393	0.0532491
1203	2089.9		60	0.0583658	0.0541516
1215.36	2107.3		61	0.0593385	0.0550542
1216	2112.27		62	0.0603113	0.0559567
1218	2114.28		63	0.061284	0.0568592
1221.2	2116.03		64	0.0622568	0.0577617
1228.11	2120.38		65	0.0632296	0.0586643
1232.96	2121.99		66	0.0642023	0.0595668
1246	2122.77		67	0.0651751	0.0604693
1260.6	2126.27		68	0.0661479	0.0613718
1266	2140.74		69	0.0671206	0.0622744
1268.46	2140.79		70	0.0680934	0.0631769
1268.8	2143.67		71	0.0690661	0.0640794
1272	2157.83		72	0.0700389	0.0649819
1272.42	2160.38		73	0.0710117	0.0658845
1273.67	2168.22		74	0.0719844	0.066787
1295.94	2169.3		75	0.0729572	0.0676895
1309.13	2179.81		76	0.07393	0.0685921
1311.85	2189.37		77	0.0749027	0.0694946
1313.64	2191.63		78	0.0758755	0.0703971
1313.82	2196.54		79	0.0768482	0.0712996
1315.38	2200.74		80	0.077821	0.0722022
1320.11	2201.17		81	0.0787938	0.0731047
1324.27	2213.87		82	0.0797665	0.0740072
1327	2219.67		83	0.0807393	0.0749097
1328.12	2220.21		84	0.0817121	0.0758123
1333.32	2220.81		85	0.0826848	0.0767148
1335.17	2223.18		86	0.0836576	0.0776173
1336.45	2226.99		87	0.0846304	0.0785199
1341	2230.8		88	0.0856031	0.0794224
1343	2233.48		89	0.0865759	0.0803249
1349.94	2233.84		90	0.0875486	0.0812274
1353.09	2234.49		91	0.0885214	0.08213
1355.15	2235.78		92	0.0894942	0.0830325
1366	2238.79		93	0.0904669	0.083935
1367.77	2241.57		94	0.0914397	0.0848375
1367.99	2259.47		95	0.0924125	0.0857401
1369	2262		96	0.0933852	0.0866426
1374	2272.53		97	0.094358	0.0875451
1376.9	2273.7		98	0.0953307	0.0884477
1377.96	2284.07		99	0.0963035	0.0893502
1381.56	2294.96		100	0.0972763	0.0902527
1389.5	2299.55		101	0.098249	0.0911552
1395	2303.36		102	0.0992218	0.0920578
1395.77	2304.03		103	0.100195	0.0929603
1396.05	2305.26		104	0.101167	0.0938628
1402.58	2312.23		105	0.10214	0.0947653
1405.82	2316.48		106	0.103113	0.0956679
1411.79	2320.42		107	0.104086	0.0965704
1412.11	2322.81		108	0.105058	0.0974729
1418	2327.46		109	0.106031	0.0983755
1421.98	2345.09		110	0.107004	0.099278
1424.1	2359.5		111	0.107977	0.100181
1434	2366.45		112	0.108949	0.101083
1434.16	2372.41		113	0.109922	0.101986
1439.74	2373.73		114	0.110895	0.102888
1440.02	2374.66		115	0.111868	0.103791
1440.27	2385.19		116	0.11284	0.104693
1441.04	2385.61		117	0.113813	0.105596
1446.59	2387.66		118	0.114786	0.106498
1449.41	2396.02		119	0.115759	0.107401
1462.22	2397.81		120	0.116732	0.108303
1464.57	2398.63		121	0.117704	0.109206
1472.85	2400.52		122	0.118677	0.110108
1481.96	2401.34		123	0.11965	0.111011
1484.46	2402.82		124	0.120623	0.111913
1486.98	2408.08		125	0.121595	0.112816
1495	2415.44		126	0.122568	0.113718
1499.06	2416.38		127	0.123541	0.114621
1506.83	2428.33		128	0.124514	0.115523
1506.98	2435.06		129	0.125486	0.116426
1510	2453.66		130	0.126459	0.117329
1510.9	2455.56		131	0.127432	0.118231
1516.5	2462.05		132	0.128405	0.119134
1518.2	2465.83		133	0.129377	0.120036
1519.71	2466.61		134	0.13035	0.120939
1521.34	2467.84		135	0.131323	0.121841
1524.35	2470.95		136	0.132296	0.122744
1526.93	2472.73		137	0.133268	0.123646
1529.55	2475.6		138	0.134241	0.124549
1531.25	2490.81		139	0.135214	0.125451
1532.45	2491.75		140	0.136187	0.126354
1532.87	2496.38		141	0.13716	0.127256
1533.39	2498.32		142	0.138132	0.128159
1536.99	2499.61		143	0.139105	0.129061
1542.15	2500.45		144	0.140078	0.129964
1552.01	2504.33		145	0.141051	0.130866
1560.13	2509.36		146	0.142023	0.131769
1565.03	2514.54		147	0.142996	0.132671
1568.09	2514.89		148	0.143969	0.133574
1568.8	2515.09		149	0.144942	0.134477
1577.37	2515.72		150	0.145914	0.135379
1579.12	2520.11		151	0.146887	0.136282
1580.62	2521.79		152	0.14786	0.137184
1584	2524.09		153	0.148833	0.138087
1591.33	2524.18		154	0.149805	0.138989
1594.35	2525.7		155	0.150778	0.139892
1596.04	2529.14		156	0.151751	0.140794
1596.31	2533.77		157	0.152724	0.141697
1596.35	2538.56		158	0.153696	0.142599
1607.1	2540.93		159	0.154669	0.143502
1607.49	2548.36		160	0.155642	0.144404
1607.67	2554		161	0.156615	0.145307
1608.16	2558.49		162	0.157588	0.146209
1611.44	2560.39		163	0.15856	0.147112
1615.2	2564.26		164	0.159533	0.148014
1615.26	2566.61		165	0.160506	0.148917
1616.75	2567.66		166	0.161479	0.149819
1620.39	2568.88		167	0.162451	0.150722
1624.56	2569.41		168	0.163424	0.151625
1626	2570.36		169	0.164397	0.152527
1630.68	2576.88		170	0.16537	0.15343
1631.26	2580.87		171	0.166342	0.154332
1631.46	2582.18		172	0.167315	0.155235
1648.41	2583.74		173	0.168288	0.156137
1650.59	2587.01		174	0.169261	0.15704
1654.24	2587.09		175	0.170233	0.157942
1655.68	2590.27		176	0.171206	0.158845
1656.98	2590.71		177	0.172179	0.159747
1661.07	2597.4		178	0.173152	0.16065
1662.4	2601.5		179	0.174125	0.161552
1671.42	2608.55		180	0.175097	0.162455
1672.68	2609.56		181	0.17607	0.163357
1675.02	2610.73		182	0.177043	0.16426
1675.25	2611.22		183	0.178016	0.165162
1675.75	2613.62		184	0.178988	0.166065
1678.06	2618.01		185	0.179961	0.166968
1679.42	2623.53		186	0.180934	0.16787
1679.66	2624.81		187	0.181907	0.168773
1681.57	2625		188	0.182879	0.169675
1684	2625.31		189	0.183852	0.170578
1688.17	2627.2		190	0.184825	0.17148
1688.73	2627.32		191	0.185798	0.172383
1691.31	2637.15		192	0.18677	0.173285
1692.04	2641.54		193	0.187743	0.174188
1694.88	2643.5		194	0.188716	0.17509
1695.33	2644.16		195	0.189689	0.175993
1706.32	2647.02		196	0.190661	0.176895
1708	2647.14		197	0.191634	0.177798
1711.76	2656.95		198	0.192607	0.1787
1713.4	2657.9		199	0.19358	0.179603
1717.06	2663.96		200	0.194553	0.180505
1724.89	2666.19		201	0.195525	0.181408
1729.47	2669.12		202	0.196498	0.18231
1733.59	2670.27		203	0.197471	0.183213
1745.43	2671.32		204	0.198444	0.184116
1749.13	2672.26		205	0.199416	0.185018
1749.83	2674.15		206	0.200389	0.185921
1755.48	2674.51		207	0.201362	0.186823
1766.33	2678.3		208	0.202335	0.187726
1767	2680.09		209	0.203307	0.188628
1770.09	2687.57		210	0.20428	0.189531
1770.19	2689.35		211	0.205253	0.190433
1772.58	2697.98		212	0.206226	0.191336
1774.01	2698.87		213	0.207198	0.192238
1775.88	2699.63		214	0.208171	0.193141
1783.47	2701.44		215	0.209144	0.194043
1783.63	2703.28		216	0.210117	0.194946
1787.8	2707.39		217	0.211089	0.195848
1788.69	2709.69		218	0.212062	0.196751
1790.98	2720.22		219	0.213035	0.197653
1791.96	2721.41		220	0.214008	0.198556
1792.26	2721.63		221	0.214981	0.199458
1792.28	2721.71		222	0.215953	0.200361
1797.53	2723.51		223	0.216926	0.201264
1797.6	2724.73		224	0.217899	0.202166
1800.55	2727.38		225	0.218872	0.203069
1803.9	2728.09		226	0.219844	0.203971
1804.88	2728.37		227	0.220817	0.204874
1805.18	2738.42		228	0.22179	0.205776
1808.55	2738.57		229	0.222763	0.206679
1811	2739.36		230	0.223735	0.207581
1812.15	2741.2		231	0.224708	0.208484
1815.13	2749.97		232	0.225681	0.209386
1816.56	2750.64		233	0.226654	0.210289
1822.73	2751.15		234	0.227626	0.211191
1824	2756.4		235	0.228599	0.212094
1825.97	2761.37		236	0.229572	0.212996
1826.22	2763.63		237	0.230545	0.213899
1832.24	2764.26		238	0.231518	0.214801
1833.71	2764.62		239	0.23249	0.215704
1834.15	2766.38		240	0.233463	0.216606
1838.03	2769.91		241	0.234436	0.217509
1845.51	2770.02		242	0.235409	0.218412
1848.1	2770.6		243	0.236381	0.219314
1852.86	2770.61		244	0.237354	0.220217
1853.64	2778.37		245	0.238327	0.221119
1855.76	2782.41		246	0.2393	0.222022
1858.36	2787.8		247	0.240272	0.222924
1860.08	2788.18		248	0.241245	0.223827
1860.3	2789.69		249	0.242218	0.224729
1862.97	2793.95		250	0.243191	0.225632
1864.81	2793.98		251	0.244163	0.226534
1872.4	2796.13		252	0.245136	0.227437
1873.44	2796.82		253	0.246109	0.228339
1874.67	2797.37		254	0.247082	0.229242
1877.05	2798.64		255	0.248054	0.230144
1878.04	2799.28		256	0.249027	0.231047
1878.71	2801.49		257	0.25	0.231949
1879.81	2807.56		258	0.250973	0.232852
1882.24	2811.77		259	0.251946	0.233755
1885.03	2816.93		260	0.252918	0.234657
1887.85	2822.79		261	0.253891	0.23556
1889.2	2822.81		262	0.254864	0.236462
1890.26	2826.65		263	0.255837	0.237365
1892.9	2833.12		264	0.256809	0.238267
1895.81	2835.73		265	0.257782	0.23917
1896.15	2836.83		266	0.258755	0.240072
1897.05	2837.2		267	0.259728	0.240975
1900.09	2838.64		268	0.2607	0.241877
1902	2848.42		269	0.261673	0.24278
1903.5	2848.72		270	0.262646	0.243682
1905.19	2852.57		271	0.263619	0.244585
1910.37	2855.14		272	0.264591	0.245487
1912.77	2856.92		273	0.265564	0.24639
1913.44	2862.71		274	0.266537	0.247292
1918.13	2871.16		275	0.26751	0.248195
1920.03	2871.28		276	0.268482	0.249097
1920.7	2873.06		277	0.269455	0.25
1924.95	2875.97		278	0.270428	0.250903
1926.51	2876.31		279	0.271401	0.251805
1927	2878.55		280	0.272374	0.252708
1928.5	2879.34		281	0.273346	0.25361
1932.44	2886.7		282	0.274319	0.254513
1934.53	2893.47		283	0.275292	0.255415
1936.31	2899.14		284	0.276265	0.256318
1942.07	2904.24		285	0.277237	0.25722
1948.93	2909.56		286	0.27821	0.258123
1949.16	2915.67		287	0.279183	0.259025
1950.05	2922.55		288	0.280156	0.259928
1950.42	2923.68		289	0.281128	0.26083
1952.65	2925.93		290	0.282101	0.261733
1953.9	2927.86		291	0.283074	0.262635
1959	2930.72		292	0.284047	0.263538
1961.82	2930.73		293	0.285019	0.26444
1970.44	2931.74		294	0.285992	0.265343
1971.9	2931.88		295	0.286965	0.266245
1973.07	2933.32		296	0.287938	0.267148
1973.44	2935.37		297	0.288911	0.268051
1976.59	2936.66		298	0.289883	0.268953
1978.22	2939.39		299	0.290856	0.269856
1979.18	2941.01		300	0.291829	0.270758
1980.89	2945.47		301	0.292802	0.271661
1985.73	2945.63		302	0.293774	0.272563
1992.67	2945.8		303	0.294747	0.273466
1995.31	2947.87		304	0.29572	0.274368
1997.69	2950.84		305	0.296693	0.275271
1998.14	2957.59		306	0.297665	0.276173
2000.86	2962.7		307	0.298638	0.277076
2000.87	2962.82		308	0.299611	0.277978
2002.29	2964.58		309	0.300584	0.278881
2004.59	2964.88		310	0.301556	0.279783
2004.92	2970.35		311	0.302529	0.280686
2005.58	2975.35		312	0.303502	0.281588
2006.52	2978.31		313	0.304475	0.282491
2008.57	2983.53		314	0.305447	0.283394
2009.24	2984.35		315	0.30642	0.284296
2011.14	2987.79		316	0.307393	0.285199
2023.15	2993.26		317	0.308366	0.286101
2023.36	2996.08		318	0.309339	0.287004
2024.87	3000.5		319	0.310311	0.287906
2025.7	3003.15		320	0.311284	0.288809
2031.28	3003.82		321	0.312257	0.289711
2032.62	3006.76		322	0.31323	0.290614
2032.81	3014.35		323	0.314202	0.291516
2034.27	3018.14		324	0.315175	0.292419
2036.45	3018.61		325	0.316148	0.293321
2040.03	3025.64		326	0.317121	0.294224
2040.32	3026.44		327	0.318093	0.295126
2040.82	3026.45		328	0.319066	0.296029
2042.67	3026.68		329	0.320039	0.296931
2044.28	3029.26		330	0.321012	0.297834
2046.96	3033.94		331	0.321984	0.298736
2048.78	3034.21		332	0.322957	0.299639
2049.32	3035.44		333	0.32393	0.300542
2053.65	3035.96		334	0.324903	0.301444
2054.89	3038.58		335	0.325875	0.302347
2055.79	3038.75		336	0.326848	0.303249
2057.27	3039.91		337	0.327821	0.304152
2059.59	3045.07		338	0.328794	0.305054
2061.66	3045.73		339	0.329767	0.305957
2062.45	3045.93		340	0.330739	0.306859
2065.53	3046.87		341	0.331712	0.307762
2066.28	3047.65		342	0.332685	0.308664
2067.24	3048.95		343	0.333658	0.309567
2068.09	3049.12		344	0.33463	0.310469
2068.59	3049.34		345	0.335603	0.311372
2069.05	3056.19		346	0.336576	0.312274
2069.68	3056.61		347	0.337549	0.313177
2070.33	3061.26		348	0.338521	0.314079
2072.17	3067.11		349	0.339494	0.314982
2078.63	3067.82		350	0.340467	0.315884
2086.77	3069.85		351	0.34144	0.316787
2087.49	3070.86		352	0.342412	0.31769
2088.69	3071.89		353	0.343385	0.318592
2089.38	3073.62		354	0.344358	0.319495
2091.72	3074.18		355	0.345331	0.320397
2092.18	3074.67		356	0.346304	0.3213
2097.18	3076.73		357	0.347276	0.322202
2097.45	3077.13		358	0.348249	0.323105
2100.64	3078.38		359	0.349222	0.324007
2101	3082.36		360	0.350195	0.32491
2101.81	3082.84		361	0.351167	0.325812
2103.6	3083.25		362	0.35214	0.326715
2104.27	3089.07		363	0.353113	0.327617
2105.84	3089.86		364	0.354086	0.32852
2106.82	3091.67		365	0.355058	0.329422
2109.78	3092.7		366	0.356031	0.330325
2115.98	3092.72		367	0.357004	0.331227
2116.25	3095.89		368	0.357977	0.33213
2117.1	3096.91		369	0.358949	0.333032
2122.04	3098.66		370	0.359922	0.333935
2127.16	3103.99		371	0.360895	0.334838
2130.62	3107.64		372	0.361868	0.33574
2133.41	3108.07		373	0.36284	0.336643
2134.84	3110.57		374	0.363813	0.337545
2136.32	3112.23		375	0.364786	0.338448
2137.37	3113.4		376	0.365759	0.33935
2139.51	3113.58		377	0.366732	0.340253
2140.3	3113.72		378	0.367704	0.341155
2141.92	3114		379	0.368677	0.342058
2147.16	3116.49		380	0.36965	0.34296
2148.62	3119.61		381	0.370623	0.343863
2149.75	3120.59		382	0.371595	0.344765
2155.01	3124.92		383	0.372568	0.345668
2155.03	3126.51		384	0.373541	0.34657
2159.97	3127.49		385	0.374514	0.347473
2161.64	3129.55		386	0.375486	0.348375
2161.99	3132.43		387	0.376459	0.349278
2166.65	3132.64		388	0.377432	0.350181
2168.58	3135.33		389	0.378405	0.351083
2169.88	3138.9		390	0.379377	0.351986
2172.59	3140.18		391	0.38035	0.352888
2173.13	3141.49		392	0.381323	0.353791
2176.47	3145.63		393	0.382296	0.354693
2178.32	3152.99		394	0.383268	0.355596
2178.75	3155.97		395	0.384241	0.356498
2179.36	3159.07		396	0.385214	0.357401
2181.64	3160.18		397	0.386187	0.358303
2182.01	3161.2		398	0.38716	0.359206
2182.38	3164.01		399	0.388132	0.360108
2183.55	3164.43		400	0.389105	0.361011
2184.2	3164.88		401	0.390078	0.361913
2190.77	3164.91		402	0.391051	0.362816
2194	3165.49		403	0.392023	0.363718
2194.96	3165.91		404	0.392996	0.364621
2198.53	3166.54		405	0.393969	0.365523
2201.08	3167.41		406	0.394942	0.366426
2203.87	3169.05		407	0.395914	0.367329
2204.32	3170.93		408	0.396887	0.368231
2213.93	3171.14		409	0.39786	0.369134
2218.9	3171.74		410	0.398833	0.370036
2219.66	3178.13		411	0.399805	0.370939
2219.98	3179.67		412	0.400778	0.371841
2223.46	3181.58		413	0.401751	0.372744
2228.39	3182.82		414	0.402724	0.373646
2229.88	3183.09		415	0.403696	0.374549
2231.73	3187.5		416	0.404669	0.375451
2232.88	3188.01		417	0.405642	0.376354
2235.19	3188.17		418	0.406615	0.377256
2238.97	3191.66		419	0.407588	0.378159
2239.13	3193.76		420	0.40856	0.379061
2240.23	3193.88		421	0.409533	0.379964
2241.42	3193.99		422	0.410506	0.380866
2244.89	3194.8		423	0.411479	0.381769
2246.96	3194.9		424	0.412451	0.382671
2247.03	3196.71		425	0.413424	0.383574
2247.07	3200.55		426	0.414397	0.384477
2247.76	3201.07		427	0.41537	0.385379
2248.41	3204.58		428	0.416342	0.386282
2254.21	3205.99		429	0.417315	0.387184
2254.47	3208.61		430	0.418288	0.388087
2258.58	3211.36		431	0.419261	0.388989
2259.1	3214.49		432	0.420233	0.389892
2260.62	3215.66		433	0.421206	0.390794
2260.65	3215.95		434	0.422179	0.391697
2260.83	3217.32		435	0.423152	0.392599
2262.8	3219.47		436	0.424125	0.393502
2263.79	3220.66		437	0.425097	0.394404
2264.32	3223.24		438	0.42607	0.395307
2265.85	3224.31		439	0.427043	0.396209
2274.9	3229.54		440	0.428016	0.397112
2275.68	3233.39		441	0.428988	0.398014
2276.42	3235.87		442	0.429961	0.398917
2278.91	3239.04		443	0.430934	0.399819
2279.36	3240.84		444	0.431907	0.400722
2284.15	3240.95		445	0.432879	0.401625
2284.66	3246.04		446	0.433852	0.402527
2285.38	3246.34		447	0.434825	0.40343
2286.74	3248.16		448	0.435798	0.404332
2290.68	3248.86		449	0.43677	0.405235
2292.2	3250.54		450	0.437743	0.406137
2295.55	3253.93		451	0.438716	0.40704
2298.66	3262.32		452	0.439689	0.407942
2302.28	3262.47		453	0.440661	0.408845
2302.97	3264.09		454	0.441634	0.409747
2303.27	3265.16		455	0.442607	0.41065
2305.64	3267.45		456	0.44358	0.411552
2306.97	3269.86		457	0.444553	0.412455
2308.32	3272.6		458	0.445525	0.413357
2312.91	3276.74		459	0.446498	0.41426
2314.6	3276.75		460	0.447471	0.415162
2323.86	3277.44		461	0.448444	0.416065
2324.13	3277.68		462	0.449416	0.416968
2328.24	3280.76		463	0.450389	0.41787
2329.23	3280.79		464	0.451362	0.418773
2332.2	3280.84		465	0.452335	0.419675
2334.33	3281.64		466	0.453307	0.420578
2337.43	3282.23		467	0.45428	0.42148
2338.69	3282.99		468	0.455253	0.422383
2339.42	3286.62		469	0.456226	0.423285
2346.45	3286.66		470	0.457198	0.424188
2347.56	3288.58		471	0.458171	0.42509
2350.95	3288.77		472	0.459144	0.425993
2351.63	3290.44		473	0.460117	0.426895
2351.69	3290.49		474	0.461089	0.427798
2352.07	3291.16		475	0.462062	0.4287
2352.34	3291.72		476	0.463035	0.429603
2353.85	3292.36		477	0.464008	0.430505
2356.79	3293.98		478	0.464981	0.431408
2359.79	3295.38		479	0.465953	0.43231
2360.2	3295.61		480	0.466926	0.433213
2360.62	3299.21		481	0.467899	0.434116
2364.95	3301.61		482	0.468872	0.435018
2371.43	3302.84		483	0.469844	0.435921
2374.53	3302.93		484	0.470817	0.436823
2376.1	3307.08		485	0.47179	0.437726
2377.09	3308.98		486	0.472763	0.438628
2378.56	3309.12		487	0.473735	0.439531
2381.56	3310.48		488	0.474708	0.440433
2382.1	3314.06		489	0.475681	0.441336
2382.55	3315.62		490	0.476654	0.442238
2383.09	3322.7		491	0.477626	0.443141
2384.34	3322.87		492	0.478599	0.444043
2385.14	3332.3		493	0.479572	0.444946
2390.86	3332.57		494	0.480545	0.445848
2391.68	3334.45		495	0.481518	0.446751
2392.79	3336.97		496	0.48249	0.447653
2395.32	3337.26		497	0.483463	0.448556
2395.95	3337.66		498	0.484436	0.449458
2399.96	3338.82		499	0.485409	0.450361
2404.4	3345.1		500	0.486381	0.451264
2408.17	3346.9		501	0.487354	0.452166
2408.29	3346.9		502	0.488327	0.453069
2408.52	3347.3		503	0.4893	0.453971
2416.15	3347.49		504	0.490272	0.454874
2417.13	3354.53		505	0.491245	0.455776
2419.21	3357.12		506	0.492218	0.456679
2420.33	3357.13		507	0.493191	0.457581
2421.24	3357.62		508	0.494163	0.458484
2421.89	3359.51		509	0.495136	0.459386
2423.09	3363.11		510	0.496109	0.460289
2423.22	3364.87		511	0.497082	0.461191
2425.97	3364.93		512	0.498054	0.462094
2427.03	3365.08		513	0.499027	0.462996
2429.53	3366.45		514	0.5	0.463899
2431.46	3366.55		515	0.500973	0.464801
2432.16	3382.21		516	0.501946	0.465704
2439.4	3383.11		517	0.502918	0.466606
2440.76	3387.46		518	0.503891	0.467509
2444.7	3390.44		519	0.504864	0.468412
2446.94	3393.25		520	0.505837	0.469314
2449.84	3393.38		521	0.506809	0.470217
2449.94	3393.79		522	0.507782	0.471119
2453.31	3394.42		523	0.508755	0.472022
2457.08	3395.96		524	0.509728	0.472924
2466.58	3396.21		525	0.5107	0.473827
2467.01	3400.79		526	0.511673	0.474729
2469.52	3403.24		527	0.512646	0.475632
2471.15	3408.31		528	0.513619	0.476534
2474.85	3408.47		529	0.514591	0.477437
2474.95	3408.97		530	0.515564	0.478339
2476.62	3409.67		531	0.516537	0.479242
2477.9	3413.62		532	0.51751	0.480144
2483.13	3417.71		533	0.518482	0.481047
2483.53	3419.62		534	0.519455	0.481949
2483.62	3423.29		535	0.520428	0.482852
2490.23	3423.4		536	0.521401	0.483755
2490.87	3424.75		537	0.522374	0.484657
2491.27	3424.98		538	0.523346	0.48556
2491.58	3425.15		539	0.524319	0.486462
2494.5	3430.9		540	0.525292	0.487365
2495.92	3431.13		541	0.526265	0.488267
2496.35	3435.74		542	0.527237	0.48917
2496.45	3436.57		543	0.52821	0.490072
2496.85	3440.86		544	0.529183	0.490975
2499.48	3440.91		545	0.530156	0.491877
2506.79	3443.61		546	0.531128	0.49278
2507.28	3444.7		547	0.532101	0.493682
2510.35	3445		548	0.533074	0.494585
2511.08	3446.23		549	0.534047	0.495487
2515.66	3448.6		550	0.535019	0.49639
2516.62	3448.61		551	0.535992	0.497292
2518.45	3448.68		552	0.536965	0.498195
2522.21	3453.38		553	0.537938	0.499097
2523.18	3454.47		554	0.538911	0.5
2527.28	3462.84		555	0.539883	0.500903
2527.36	3465.67		556	0.540856	0.501805
2529.18	3466.03		557	0.541829	0.502708
2531.72	3467.09		558	0.542802	0.50361
2531.93	3467.53		559	0.543774	0.504513
2531.97	3468.03		560	0.544747	0.505415
2532.06	3469.87		561	0.54572	0.506318
2534.16	3470.07		562	0.546693	0.50722
2538.41	3472.86		563	0.547665	0.508123
2540.7	3475.99		564	0.548638	0.509025
2541.65	3478.04		565	0.549611	0.509928
2544.27	3478.43		566	0.550584	0.51083
2544.51	3481.8		567	0.551556	0.511733
2545.27	3483.63		568	0.552529	0.512635
2546.91	3483.86		569	0.553502	0.513538
2550.9	3485.97		570	0.554475	0.51444
2554.75	3488.23		571	0.555447	0.515343
2555.02	3488.26		572	0.55642	0.516245
2559.49	3488.44		573	0.557393	0.517148
2566.88	3488.87		574	0.558366	0.518051
2567.78	3489.72		575	0.559339	0.518953
2569.88	3491.52		576	0.560311	0.519856
2572.72	3491.86		577	0.561284	0.520758
2575.27	3493.63		578	0.562257	0.521661
2578.65	3494.08		579	0.56323	0.522563
2579.01	3494.09		580	0.564202	0.523466
2581.53	3497.85		581	0.565175	0.524368
2583.83	3500.69		582	0.566148	0.525271
2587.87	3501.96		583	0.567121	0.526173
2588.41	3502.6		584	0.568093	0.527076
2588.56	3503.04		585	0.569066	0.527978
2589.66	3506.93		586	0.570039	0.528881
2590.82	3509.33		587	0.571012	0.529783
2591.88	3511.81		588	0.571984	0.530686
2592.43	3513.75		589	0.572957	0.531588
2593.55	3515.53		590	0.57393	0.532491
2593.92	3517.13		591	0.574903	0.533394
2596.37	3523.46		592	0.575875	0.534296
2597.16	3524.21		593	0.576848	0.535199
2598.31	3525.43		594	0.577821	0.536101
2598.97	3527.15		595	0.578794	0.537004
2601.63	3528.5		596	0.579767	0.537906
2605.26	3530.17		597	0.580739	0.538809
2605.7	3530.48		598	0.581712	0.539711
2606.82	3530.56		599	0.582685	0.540614
2611.25	3530.63		600	0.583658	0.541516
2616.26	3530.68		601	0.58463	0.542419
2616.95	3531.8		602	0.585603	0.543321
2618.38	3534.87		603	0.586576	0.544224
2621.62	3538.68		604	0.587549	0.545126
2622.41	3539.41		605	0.588521	0.546029
2622.71	3547.03		606	0.589494	0.546931
2623.09	3547.7		607	0.590467	0.547834
2625.09	3547.72		608	0.59144	0.548736
2626.88	3547.91		609	0.592412	0.549639
2627.44	3548.1		610	0.593385	0.550542
2628.82	3549.98		611	0.594358	0.551444
2629.31	3551.21		612	0.595331	0.552347
2633.06	3555.35		613	0.596304	0.553249
2633.75	3556.89		614	0.597276	0.554152
2634.69	3559.99		615	0.598249	0.555054
2634.85	3561.63		616	0.599222	0.555957
2634.95	3562.69		617	0.600195	0.556859
2635.99	3568.87		618	0.601167	0.557762
2640.29	3571.96		619	0.60214	0.558664
2640.7	3574.77		620	0.603113	0.559567
2641.29	3575.99		621	0.604086	0.560469
2641.33	3579.4		622	0.605058	0.561372
2645.23	3580.44		623	0.606031	0.562274
2645.3	3582.81		624	0.607004	0.563177
2647.31	3586.79		625	0.607977	0.564079
2648.68	3587.09		626	0.608949	0.564982
2649.13	3590.67		627	0.609922	0.565884
2651.4	3591.33		628	0.610895	0.566787
2651.4	3591.91		629	0.611868	0.56769
2651.9	3591.91		630	0.61284	0.568592
2652.78	3594.47		631	0.613813	0.569495
2654.2	3594.56		632	0.614786	0.570397
2664.26	3595.19		633	0.615759	0.5713
2664.28	3595.62		634	0.616732	0.572202
2665.99	3595.68		635	0.617704	0.573105
2669.57	3598.83		636	0.618677	0.574007
2675.6	3598.84		637	0.61965	0.57491
2687.93	3599.35		638	0.620623	0.575812
2688.64	3600.14		639	0.621595	0.576715
2692.25	3600.56		640	0.622568	0.577617
2693.84	3606.37		641	0.623541	0.57852
2697.5	3608.5		642	0.624514	0.579422
2703.96	3614.66		643	0.625486	0.580325
2704.12	3619.13		644	0.626459	0.581227
2712.14	3626.15		645	0.627432	0.58213
2715.57	3626.84		646	0.628405	0.583032
2719.35	3629.53		647	0.629377	0.583935
2721.11	3633.45		648	0.63035	0.584838
2725.09	3638.03		649	0.631323	0.58574
2725.57	3639.13		650	0.632296	0.586643
2726.18	3640.39		651	0.633268	0.587545
2732.4	3641.92		652	0.634241	0.588448
2733.11	3643.05		653	0.635214	0.58935
2733.84	3644.23		654	0.636187	0.590253
2734.65	3648.24		655	0.63716	0.591155
2750.28	3649.44		656	0.638132	0.592058
2752.38	3650.91		657	0.639105	0.59296
2755.39	3656.04		658	0.640078	0.593863
2756.11	3660.68		659	0.641051	0.594765
2761.59	3660.89		660	0.642023	0.595668
2763.5	3661.67		661	0.642996	0.59657
2764.6	3663.3		662	0.643969	0.597473
2769.57	3666.15		663	0.644942	0.598375
2772.59	3667.51		664	0.645914	0.599278
2774.16	3667.53		665	0.646887	0.600181
2779.33	3671.11		666	0.64786	0.601083
2779.9	3671.13		667	0.648833	0.601986
2788.91	3672.85		668	0.649805	0.602888
2789.95	3677.12		669	0.650778	0.603791
2790.01	3683.4		670	0.651751	0.604693
2791.17	3683.73		671	0.652724	0.605596
2791.99	3688.65		672	0.653696	0.606498
2796.53	3689.09		673	0.654669	0.607401
2798.14	3690.72		674	0.655642	0.608303
2798.54	3692.16		675	0.656615	0.609206
2798.72	3694.64		676	0.657588	0.610108
2802.6	3695		677	0.65856	0.611011
2804.03	3695.6		678	0.659533	0.611913
2805.45	3699.98		679	0.660506	0.612816
2805.66	3701.04		680	0.661479	0.613718
2806.17	3704.63		681	0.662451	0.614621
2807.26	3708.03		682	0.663424	0.615523
2812.81	3709.07		683	0.664397	0.616426
2813.6	3712.68		684	0.66537	0.617329
2823.18	3712.78		685	0.666342	0.618231
2826.07	3713.49		686	0.667315	0.619134
2827.62	3714.98		687	0.668288	0.620036
2831.29	3717.92		688	0.669261	0.620939
2833.57	3718.33		689	0.670233	0.621841
2838.12	3720.28		690	0.671206	0.622744
2838.39	3720.9		691	0.672179	0.623646
2842.57	3725.23		692	0.673152	0.624549
2848.64	3725.55		693	0.674125	0.625451
2850.47	3727.33		694	0.675097	0.626354
2850.79	3728.84		695	0.67607	0.627256
2851.29	3745.86		696	0.677043	0.628159
2852.3	3750.43		697	0.678016	0.629061
2853.12	3751.8		698	0.678988	0.629964
2856.69	3760.81		699	0.679961	0.630866
2857.7	3762.92		700	0.680934	0.631769
2857.94	3765.59		701	0.681907	0.632671
2862.07	3770.09		702	0.682879	0.633574
2865.44	3774.15		703	0.683852	0.634477
2866.8	3774.22		704	0.684825	0.635379
2868.17	3779.62		705	0.685798	0.636282
2874.09	3780.21		706	0.68677	0.637184
2875.25	3781.17		707	0.687743	0.638087
2877.52	3782.74		708	0.688716	0.638989
2883.17	3786.89		709	0.689689	0.639892
2884.84	3788.18		710	0.690661	0.640794
2886.05	3789.43		711	0.691634	0.641697
2886.32	3799.41		712	0.692607	0.642599
2886.71	3801.85		713	0.69358	0.643502
2889.54	3804.1		714	0.694553	0.644404
2893.03	3804.38		715	0.695525	0.645307
2893.2	3807.05		716	0.696498	0.646209
2893.39	3807.72		717	0.697471	0.647112
2893.68	3809.43		718	0.698444	0.648014
2900.69	3813.69		719	0.699416	0.648917
2900.8	3819.23		720	0.700389	0.649819
2903.86	3829.97		721	0.701362	0.650722
2905.23	3830.71		722	0.702335	0.651625
2907.3	3830.99		723	0.703307	0.652527
2911.38	3831.92		724	0.70428	0.65343
2918.61	3832.43		725	0.705253	0.654332
2921.08	3832.44		726	0.706226	0.655235
2924.01	3833.54		727	0.707198	0.656137
2928.75	3836.33		728	0.708171	0.65704
2930.9	3838.01		729	0.709144	0.657942
2932.6	3843.55		730	0.710117	0.658845
2933.66	3844.33		731	0.711089	0.659747
2939.4	3844.54		732	0.712062	0.66065
2957.18	3854.63		733	0.713035	0.661552
2960.54	3856.71		734	0.714008	0.662455
2963.61	3857.17		735	0.714981	0.663357
2970.85	3859.26		736	0.715953	0.66426
2979.9	3860.69		737	0.716926	0.665162
2986.21	3861.29		738	0.717899	0.666065
2989.91	3865.02		739	0.718872	0.666968
2994.67	3868.36		740	0.719844	0.66787
2994.92	3870.6		741	0.720817	0.668773
2995.51	3880.69		742	0.72179	0.669675
3012.12	3883.69		743	0.722763	0.670578
3012.64	3887.68		744	0.723735	0.67148
3013.39	3888.3		745	0.724708	0.672383
3023.47	3889.68		746	0.725681	0.673285
3023.89	3890.54		747	0.726654	0.674188
3027.37	3891.34		748	0.727626	0.67509
3029.16	3891.46		749	0.728599	0.675993
3033.32	3896.12		750	0.729572	0.676895
3036.82	3899.21		751	0.730545	0.677798
3038.33	3905.83		752	0.731518	0.6787
3041.16	3906.87		753	0.73249	0.679603
3041.98	3907.16		754	0.733463	0.680505
3046.41	3912.25		755	0.734436	0.681408
3048.26	3912.4		756	0.735409	0.68231
3049.57	3919.75		757	0.736381	0.683213
3056.47	3920.91		758	0.737354	0.684116
3056.53	3921.21		759	0.738327	0.685018
3062.78	3925.89		760	0.7393	0.685921
3075.89	3928.02		761	0.740272	0.686823
3078.17	3928.38		762	0.741245	0.687726
3083.35	3929.08		763	0.742218	0.688628
3086.39	3929.14		764	0.743191	0.689531
3087.15	3929.37		765	0.744163	0.690433
3091.54	3931.65		766	0.745136	0.691336
3092.06	3939.26		767	0.746109	0.692238
3092.1	3939.87		768	0.747082	0.693141
3092.21	3943.98		769	0.748054	0.694043
3095.51	3947.29		770	0.749027	0.694946
3096.7	3948.46		771	0.75	0.695848
3100.15	3949.34		772	0.750973	0.696751
3109.31	3950.63		773	0.751946	0.697653
3111.72	3964.32		774	0.752918	0.698556
3112.79	3964.98		775	0.753891	0.699458
3119.96	3970.09		776	0.754864	0.700361
3123.09	3972.37		777	0.755837	0.701264
3133.42	3980.65		778	0.756809	0.702166
3142.44	3986.3		779	0.757782	0.703069
3148.32	3986.91		780	0.758755	0.703971
3148.99	3989.47		781	0.759728	0.704874
3149.35	3989.61		782	0.7607	0.705776
3153.56	3990.07		783	0.761673	0.706679
3155.64	3998.09		784	0.762646	0.707581
3157.39	3998.57		785	0.763619	0.708484
3164.05	4001.19		786	0.764591	0.709386
3169.29	4001.84		787	0.765564	0.710289
3175.95	4005.01		788	0.766537	0.711191
3191.01	4006.57		789	0.76751	0.712094
3198.79	4006.75		790	0.768482	0.712996
3199.76	4007.2		791	0.769455	0.713899
3201.01	4008.95		792	0.770428	0.714801
3209.1	4012.05		793	0.771401	0.715704
3210.92	4016.5		794	0.772374	0.716606
3214.5	4023.76		795	0.773346	0.717509
3215.05	4027.75		796	0.774319	0.718412
3216.27	4036.26		797	0.775292	0.719314
3218.72	4036.83		798	0.776265	0.720217
3219.29	4040.92		799	0.777237	0.721119
3220.32	4042.2		800	0.77821	0.722022
3227.98	4042.55		801	0.779183	0.722924
3232.05	4042.73		802	0.780156	0.723827
3241.25	4045.17		803	0.781128	0.724729
3243.77	4047.43		804	0.782101	0.725632
3247.63	4049.64		805	0.783074	0.726534
3250.67	4049.8		806	0.784047	0.727437
3254.71	4059.08		807	0.785019	0.728339
3259.62	4060.19		808	0.785992	0.729242
3262.09	4060.3		809	0.786965	0.730144
3269.23	4060.96		810	0.787938	0.731047
3269.83	4064.59		811	0.788911	0.731949
3273.05	4065.27		812	0.789883	0.732852
3284.55	4069.6		813	0.790856	0.733755
3286.32	4071.36		814	0.791829	0.734657
3289.76	4072.39		815	0.792802	0.73556
3294.56	4072.59		816	0.793774	0.736462
3296.92	4073.72		817	0.794747	0.737365
3298.45	4079.26		818	0.79572	0.738267
3301.79	4079.67		819	0.796693	0.73917
3302.82	4080.45		820	0.797665	0.740072
3308.67	4083.18		821	0.798638	0.740975
3319.4	4084.12		822	0.799611	0.741877
3322.95	4086.91		823	0.800584	0.74278
3332.41	4087.85		824	0.801556	0.743682
3333.93	4088.93		825	0.802529	0.744585
3338.72	4091.12		826	0.803502	0.745487
3347.84	4095.48		827	0.804475	0.74639
3379.8	4100.92		828	0.805447	0.747292
3383.62	4102.19		829	0.80642	0.748195
3384.56	4105.44		830	0.807393	0.749097
3389.92	4105.51		831	0.808366	0.75
3390.69	4106.67		832	0.809339	0.750903
3390.87	4108.29		833	0.810311	0.751805
3393.43	4111.24		834	0.811284	0.752708
3395.32	4117.68		835	0.812257	0.75361
3400.83	4122.78		836	0.81323	0.754513
3405.2	4123.11		837	0.814202	0.755415
3410.1	4132.84		838	0.815175	0.756318
3411.79	4138.43		839	0.816148	0.75722
3417.62	4148.64		840	0.817121	0.758123
3429.26	4156.95		841	0.818093	0.759025
3433.87	4158.32		842	0.819066	0.759928
3434.35	4158.66		843	0.820039	0.76083
3442.06	4163.12		844	0.821012	0.761733
3442.07	4169.29		845	0.821984	0.762635
3444.08	4171.74		846	0.822957	0.763538
3444.14	4172.29		847	0.82393	0.76444
3445.98	4174.29		848	0.824903	0.765343
3446.13	4174.59		849	0.825875	0.766245
3448.55	4177.94		850	0.826848	0.767148
3453.25	4178.57		851	0.827821	0.768051
3469.29	4179.53		852	0.828794	0.768953
3473.53	4180.38		853	0.829767	0.769856
3476.02	4180.89		854	0.830739	0.770758
3478.02	4181.76		855	0.831712	0.771661
3486.4	4183.98		856	0.832685	0.772563
3489.72	4185.97		857	0.833658	0.773466
3490.02	4193.9		858	0.83463	0.774368
3496.29	4197.01		859	0.835603	0.775271
3501.36	4197.11		860	0.836576	0.776173
3504.48	4197.94		861	0.837549	0.777076
3511.01	4200.07		862	0.838521	0.777978
3515.25	4212.1		863	0.839494	0.778881
3520.36	4213.99		864	0.840467	0.779783
3534.33	4215.25		865	0.84144	0.780686
3545.37	4221.57		866	0.842412	0.781588
3545.38	4221.68		867	0.843385	0.782491
3548.51	4223.76		868	0.844358	0.783394
3548.78	4227.07		869	0.845331	0.784296
3552.32	4228.72		870	0.846304	0.785199
3553.11	4233.7		871	0.847276	0.786101
3560.62	4234.47		872	0.848249	0.787004
3561.51	4239.55		873	0.849222	0.787906
3565.78	4240.15		874	0.850195	0.788809
3570.69	4246.24		875	0.851167	0.789711
3583.41	4248.34		876	0.85214	0.790614
3586.44	4252.64		877	0.853113	0.791516
3591.38	4259.09		878	0.854086	0.792419
3599.92	4262.09		879	0.855058	0.793321
3604.61	4276.72		880	0.856031	0.794224
3605.93	4284.78		881	0.857004	0.795126
3609.27	4285.04		882	0.857977	0.796029
3610.71	4285.58		883	0.858949	0.796931
3627.68	4288.06		884	0.859922	0.797834
3636.41	4288.34		885	0.860895	0.798736
3638.99	4294.46		886	0.861868	0.799639
3649.36	4294.53		887	0.86284	0.800542
3668.46	4298.69		888	0.863813	0.801444
3668.87	4304.35		889	0.864786	0.802347
3671.7	4305.83		890	0.865759	0.803249
3671.72	4306.82		891	0.866732	0.804152
3673.01	4308.94		892	0.867704	0.805054
3677.57	4312.94		893	0.868677	0.805957
3685.74	4320.04		894	0.86965	0.806859
3705.95	4321.66		895	0.870623	0.807762
3707.46	4327.03		896	0.871595	0.808664
3714.96	4327.96		897	0.872568	0.809567
3738.11	4328.49		898	0.873541	0.810469
3747.12	4332.03		899	0.874514	0.811372
3748.75	4332.32		900	0.875486	0.812274
3750.59	4334.14		901	0.876459	0.813177
3752.43	4335.45		902	0.877432	0.814079
3753.94	4339.3		903	0.878405	0.814982
3755.16	4339.61		904	0.879377	0.815884
3774.88	4344.15		905	0.88035	0.816787
3785.43	4344.26		906	0.881323	0.81769
3794.27	4348.41		907	0.882296	0.818592
3811.36	4351.51		908	0.883268	0.819495
3811.4	4352.34		909	0.884241	0.820397
3813.16	4355.32		910	0.885214	0.8213
3822.27	4366.63		911	0.886187	0.822202
3828.39	4370.19		912	0.88716	0.823105
3858.93	4378.09		913	0.888132	0.824007
3886.16	4381.55		914	0.889105	0.82491
3888.05	4394.51		915	0.890078	0.825812
3891.03	4407.09		916	0.891051	0.826715
3891.2	4414.06		917	0.892023	0.827617
3909.46	4417.84		918	0.892996	0.82852
3915.93	4419.82		919	0.893969	0.829422
3921.15	4423.73		920	0.894942	0.830325
3926.63	4428.76		921	0.895914	0.831227
3943.84	4432.53		922	0.896887	0.83213
3947.62	4433.08		923	0.89786	0.833032
3955.59	4435.6		924	0.898833	0.833935
3987.57	4438.23		925	0.899805	0.834838
3988.87	4440.71		926	0.900778	0.83574
3994.37	4442.57		927	0.901751	0.836643
4003.95	4446.83		928	0.902724	0.837545
4026.79	4449.46		929	0.903696	0.838448
4033.39	4453.93		930	0.904669	0.83935
4036.03	4457.96		931	0.905642	0.840253
4044.5	4471.68		932	0.906615	0.841155
4047.35	4474.73		933	0.907588	0.842058
4058.5	4477.12		934	0.90856	0.84296
4068.17	4480.54		935	0.909533	0.843863
4083.49	4484.33		936	0.910506	0.844765
4088.18	4487.41		937	0.911479	0.845668
4094.5	4490.64		938	0.912451	0.84657
4095.51	4497.93		939	0.913424	0.847473
4098.06	4499.61		940	0.914397	0.848375
4118.89	4511.65		941	0.91537	0.849278
4122.69	4512.07		942	0.916342	0.850181
4124.31	4517.51		943	0.917315	0.851083
4135.94	4517.65		944	0.918288	0.851986
4137.25	4530.19		945	0.919261	0.852888
4160.45	4531.68		946	0.920233	0.853791
4168.87	4532.31		947	0.921206	0.854693
4178.14	4533.86		948	0.922179	0.855596
4191.53	4543.7		949	0.923152	0.856498
4206.61	4546.43		950	0.924125	0.857401
4239.56	4546.64		951	0.925097	0.858303
4239.69	4557.99		952	0.92607	0.859206
4263.51	4558.95		953	0.927043	0.860108
4267.7	4571.66		954	0.928016	0.861011
4288.96	4574.58		955	0.928988	0.861913
4335.52	4574.93		956	0.929961	0.862816
4341.2	4584.98		957	0.930934	0.863718
4354.51	4588.52		958	0.931907	0.864621
4367.26	4591.77		959	0.932879	0.865523
4373.4	4601.67		960	0.933852	0.866426
4380.04	4615.04		961	0.934825	0.867329
4380.44	4616.69		962	0.935798	0.868231
4407.62	4623.94		963	0.93677	0.869134
4420.83	4624.4		964	0.937743	0.870036
4427.81	4630.58		965	0.938716	0.870939
4439.95	4642.49		966	0.939689	0.871841
4455.41	4642.9		967	0.940661	0.872744
4473.89	4663.83		968	0.941634	0.873646
4489.34	4665.04		969	0.942607	0.874549
4507.88	4665.47		970	0.94358	0.875451
4543.27	4670.55		971	0.944553	0.876354
4550.82	4693.36		972	0.945525	0.877256
4578.69	4700.75		973	0.946498	0.878159
4595.25	4700.86		974	0.947471	0.879061
4608.33	4702.16		975	0.948444	0.879964
4632.47	4722.38		976	0.949416	0.880866
4656.31	4728.14		977	0.950389	0.881769
4676.75	4730.41		978	0.951362	0.882671
4713.3	4744.07		979	0.952335	0.883574
4745.56	4754.41		980	0.953307	0.884477
4761.04	4757.73		981	0.95428	0.885379
4774.47	4763.24		982	0.955253	0.886282
4816.71	4767.14		983	0.956226	0.887184
4823.27	4770.8		984	0.957198	0.888087
4854.15	4774.7		985	0.958171	0.888989
4858.1	4778.69		986	0.959144	0.889892
4875.53	4799.61		987	0.960117	0.890794
4890.22	4815.02		988	0.961089	0.891697
4909.65	4828.33		989	0.962062	0.892599
4912.1	4837.34		990	0.963035	0.893502
4930.07	4842.63		991	0.964008	0.894404
4999.01	4851.26		992	0.964981	0.895307
5006.61	4852.64		993	0.965953	0.896209
5009.23	4868.64		994	0.966926	0.897112
5018.46	4879.36		995	0.967899	0.898014
5033.48	4881.2		996	0.968872	0.898917
5085.67	4905.37		997	0.969844	0.899819
5204.89	4947.77		998	0.970817	0.900722
5209.22	4958.27		999	0.97179	0.901625
5241.92	4962.58		1000	0.972763	0.902527
5258.71	4966.37		1001	0.973735	0.90343
5351.15	4970		1002	0.974708	0.904332
5367.95	4974.08		1003	0.975681	0.905235
5387.38	4974.15		1004	0.976654	0.906137
5462.3	4982.98		1005	0.977626	0.90704
5468.5	4986.93		1006	0.978599	0.907942
5523.38	4992.44		1007	0.979572	0.908845
5527.24	5007.74		1008	0.980545	0.909747
5600.63	5009.67		1009	0.981518	0.91065
5624.17	5028.56		1010	0.98249	0.911552
5655.2	5072.56		1011	0.983463	0.912455
5793.28	5083.07		1012	0.984436	0.913357
5872.87	5109.32		1013	0.985409	0.91426
5991.32	5115.62		1014	0.986381	0.915162
6046.56	5117.63		1015	0.987354	0.916065
6190	5123.83		1016	0.988327	0.916968
6202.66	5129.18		1017	0.9893	0.91787
6289	5130.16		1018	0.990272	0.918773
6454.84	5140.89		1019	0.991245	0.919675
6779.63	5143.35		1020	0.992218	0.920578
6963.16	5145.23		1021	0.993191	0.92148
7074.41	5148.59		1022	0.994163	0.922383
7078.39	5150.91		1023	0.995136	0.923285
7470.04	5185.96		1024	0.996109	0.924188
7483.64	5212.52		1025	0.997082	0.92509
7485.39	5213.4		1026	0.998054	0.925993
9293.15	5227.3		1027	0.999027	0.926895
9860.58	5237.01		1028	1	0.927798
	5242.75		1029		0.9287
	5254.48		1030		0.929603
	5254.48		1031		0.930505
	5256.07		1032		0.931408
	5259.45		1033		0.93231
	5275.49		1034		0.933213
	5280.8		1035		0.934116
	5288.78		1036		0.935018
	5289.58		1037		0.935921
	5292.29		1038		0.936823
	5292.54		1039		0.937726
	5293.42		1040		0.938628
	5335.22		1041		0.939531
	5352.1		1042		0.940433
	5370.74		1043		0.941336
	5380.65		1044		0.942238
	5395.12		1045		0.943141
	5410.22		1046		0.944043
	5433.27		1047		0.944946
	5436.99		1048		0.945848
	5452.25		1049		0.946751
	5461.85		1050		0.947653
	5463.86		1051		0.948556
	5483.29		1052		0.949458
	5485.65		1053		0.950361
	5491.4		1054		0.951264
	5497.12		1055		0.952166
	5497.26		1056		0.953069
	5498.16		1057		0.953971
	5505.14		1058		0.954874
	5517.71		1059		0.955776
	5570.37		1060		0.956679
	5581.11		1061		0.957581
	5582.78		1062		0.958484
	5609.03		1063		0.959386
	5611.71		1064		0.960289
	5629.74		1065		0.961191
	5637.98		1066		0.962094
	5661.3		1067		0.962996
	5701.57		1068		0.963899
	5710.44		1069		0.964801
	5715.07		1070		0.965704
	5736.45		1071		0.966606
	5743.96		1072		0.967509
	5748.96		1073		0.968412
	5762.28		1074		0.969314
	5767.59		1075		0.970217
	5769.14		1076		0.971119
	5794.07		1077		0.972022
	5799.17		1078		0.972924
	5821.03		1079		0.973827
	5827.35		1080		0.974729
	5848.65		1081		0.975632
	5929.13		1082		0.976534
	5950.28		1083		0.977437
	5952.93		1084		0.978339
	6021.99		1085		0.979242
	6041.43		1086		0.980144
	6125.44		1087		0.981047
	6276.25		1088		0.981949
	6373.58		1089		0.982852
	6438.05		1090		0.983755
	6460.82		1091		0.984657
	6461.91		1092		0.98556
	6475.03		1093		0.986462
	6499.03		1094		0.987365
	6530.85		1095		0.988267
	6532.62		1096		0.98917
	6542.21		1097		0.990072
	6590.81		1098		0.990975
	6789.89		1099		0.991877
	6799.18		1100		0.99278
	6861.32		1101		0.993682
	6892.12		1102		0.994585
	6912.15		1103		0.995487
	7008.01		1104		0.99639
	7497.65		1105		0.997292
	7738.89		1106		0.998195
	7960.6		1107		0.999097
	8575.3		1108		1

## Sheet: Fig 9E
20	70	20 Control	20 LaCl
30.3054	27.7834	38.6099	32.4125
23.5375	28.0514	29.6385	19.8725
29.4347	31.3707	33.227	27.7596
27.1835	28.7163	32.2237	21.0427
32.6938	28.9546	40.0501	20.5212

## Sheet: Fig 9F
WT	K105EK109E
0.00208428	0.160838
0.00168218	0.250615
0.00111164	0.10096
0.00169086	0.257951
0.000254385	0.221115
7.50185e-05	0.200088
5.74595e-05	0.243011
0.000317811	0.172141
-0.00249464	0.197743
-0.00302283	0.289098
-0.00209245	0.228002
-0.0005344	0.204523
-0.000962207	0.246464
-0.000378754	0.171618
-0.0011722	0.126951
	0.100068
