# Supplementary material for: CO2-dependent opening of connexin 43 hemichannels
Source: eLife. 2026 Jun 3;14:RP105989. doi: 10.7554/eLife.105989 (PMC13233067; doi:10.7554/eLife.105989)
Supplement: Figure 10—source data 1. [file elife-105989-fig10-data1.xlsx]

## Sheet: Fig 10A
fEPSP 20 to 35
Time	AVG	SEM
0	1.10627	0.126478
15	1.13825	0.154009
30	1.06155	0.108424
45	1.03992	0.0941324
60	1.0666	0.0998741
75	1.012	0.0502517
90	1.02282	0.0585376
105	1.00933	0.0332511
120	0.976382	0.0391719
135	0.995848	0.0237576
150	0.937946	0.0566041
165	0.976812	0.0179691
180	0.955955	0.0155755
195	0.971397	0.014446
210	0.977727	0.009347
225	0.996448	0.0151976
240	1.0007	0.0200463
255	0.9958	0.0107704
270	0.983257	0.00854083
285	0.996883	0.0177036
300	0.970275	0.0187776
315	1.00022	0.00450476
330	0.996583	0.00561289
345	1.00721	0.0105157
360	0.998973	0.00530026
375	0.989046	0.00771911
390	0.989396	0.00580706
405	1.00415	0.0130512
420	1.01743	0.0147876
435	1.03723	0.0103967
450	1.00147	0.018927
465	1.01885	0.0134855
480	0.996551	0.00648093
495	1.0001	0.0109368
510	1.00163	0.0168323
525	1.02703	0.0117499
540	1.01266	0.00718792
555	0.998938	0.0041208
570	1.00186	0.0259879
585	0.985403	0.0116234
600	1.03777	0.0169193
615	1.00235	0.0113411
630	1.01515	0.0147568
645	0.9783	0.0278253
660	1.01089	0.0225976
675	1.02502	0.0170608
690	1.02731	0.0145828
705	1.03236	0.0195566
720	1.05345	0.0141945
735	1.01478	0.0138217
750	1.00787	0.0198984
765	1.03799	0.0299335
780	0.99653	0.0298255
795	1.0238	0.035862
810	1.0246	0.0307868
825	1.00742	0.0328735
840	1.01253	0.0322061
855	1.04028	0.0429765
870	1.0205	0.0412762
885	1.05098	0.0369625
900	1.04547	0.0385735
915	1.07328	0.0372024
930	1.06789	0.0410456
945	1.08734	0.0425793
960	1.08424	0.0431132
975	1.09528	0.0314535
990	1.10479	0.0370926
1005	1.10403	0.0379446
1020	1.16048	0.0451004
1035	1.15829	0.0417174
1050	1.16198	0.0353446
1065	1.18253	0.0370312
1080	1.18756	0.0493957
1095	1.20498	0.0401685
1110	1.19486	0.0461711
1125	1.20861	0.0539673
1140	1.21395	0.0471378
1155	1.21867	0.0396768
1170	1.2096	0.0381943
1185	1.23617	0.0476062
1200	1.23299	0.0412432
1215	1.22932	0.041949
1230	1.22424	0.045172
1245	1.22713	0.0338578
1260	1.22789	0.0402256
1275	1.23003	0.0363143
1290	1.2363	0.0457561
1305	1.207	0.0318021
1320	1.20678	0.0350983
1335	1.25261	0.0365525
1350	1.20082	0.0314216
1365	1.24416	0.039463
1380	1.25932	0.0365292
1395	1.26549	0.0318823
1410	1.23701	0.0365552
1425	1.25527	0.0322411
1440	1.26072	0.0388795
1455	1.26784	0.0387572
1470	1.24807	0.0334009
1485	1.2734	0.0413635
1500	1.27728	0.0414015
1515	1.26371	0.0273206
1530	1.26994	0.0331871
1545	1.25492	0.0311392
1560	1.24233	0.0234154
1575	1.26708	0.031642
1590	1.24544	0.0385518
1605	1.26305	0.0500301
1620	1.25822	0.0476349
1635	1.26131	0.033094
1650	1.27296	0.0347892
1665	1.24858	0.0394818
1680	1.2668	0.0590386
1695	1.2824	0.077487
1710	1.25005	0.0494956
1725	1.28501	0.0628972
1740	1.30543	0.0680197
1755	1.31542	0.0851181
1770	1.19519	0.0245491
1785	1.26686	0.0467289
1800	1.24465	0.0376435
1815	1.26426	0.0471627
1830	1.28444	0.0550237
1845	1.26897	0.0462384
1860	1.25349	0.0337742
1875	1.25637	0.0366748
1890	1.22725	0.0446289
1905	1.2146	0.0406593
1920	1.23354	0.0284656
1935	1.2224	0.0341551
1950	1.22818	0.0310423
1965	1.24112	0.0471953
1980	1.22063	0.0394756
1995	1.23887	0.0468288
2010	1.22997	0.0412905
2025	1.21429	0.0346418
2040	1.21387	0.042679
2055	1.16255	0.0220125
2070	1.19793	0.0328052
2085	1.2077	0.0445647
2100	1.20106	0.0361353
2115	1.19141	0.0312641
2130	1.16782	0.0213265
2145	1.14675	0.0187235
2160	1.17917	0.0350523
2175	1.15266	0.0168981
2190	1.15596	0.0244596
2205	1.14436	0.0215487
2220	1.1551	0.0279405
2235	1.14983	0.023404
2250	1.1325	0.0204319
2265	1.1259	0.0220124
2280	1.13381	0.0324856
2295	1.14918	0.0278287
2310	1.12416	0.0250214
2325	1.1112	0.0278964
2340	1.13285	0.0338018
2355	1.11823	0.0224443
2370	1.11176	0.0264315
2385	1.11541	0.0281463
2400	1.10251	0.0174601
2415	1.10478	0.0251368
2430	1.14786	0.0437187
2445	1.10568	0.0306655
2460	1.08474	0.0195927
2475	1.08104	0.0229867
2490	1.07534	0.0180242
2505	1.0668	0.0168735
2520	1.06611	0.0217211
2535	1.08528	0.0253142
2550	1.06324	0.0287789
2565	1.07514	0.0278359
2580	1.07462	0.0401646
2595	1.06639	0.027791
2610	1.0781	0.0293473
2625	1.06186	0.0250651
2640	1.08671	0.0280959
2655	1.06505	0.028438
2670	1.07102	0.028161
2685	1.07409	0.0283978
2700	1.0336	0.0373921
2715	1.05004	0.0248965
2730	1.07595	0.0287301
2745	1.07139	0.0295725
2760	1.07789	0.0323522
2775	1.0575	0.0292615
2790	1.06188	0.0276172
2805	1.05109	0.0208295
2820	1.02167	0.0167427
2835	1.03987	0.0191596
2850	1.05252	0.0227378
2865	1.03398	0.0229522
2880	1.05187	0.0304646
2895	1.03433	0.022587
2910	1.04367	0.020453
2925	1.05233	0.0166701
2940	1.04544	0.0226374
2955	1.06069	0.024888
2970	1.05065	0.0253956
2985	1.06536	0.0287718
3000	1.05438	0.0263083
3015	1.03433	0.022409
3030	1.05824	0.0378657
3045	1.0669	0.0409557
3060	1.03187	0.0398986
3075	1.04449	0.0449817
3090	1.05128	0.0335562
3105	1.04754	0.0442012
3120	1.06248	0.0591074

## Sheet: Fig 10B
Gap26
Time	AVG	SEM
0	1.06094	0.031335
15.0313	1.06074	0.0291968
30.0313	1.04634	0.0174952
45.0313	1.02854	0.0155466
60.0313	1.03051	0.0114224
75.0625	1.00741	0.0115263
90.0781	1.00414	0.0167928
105.047	1.00652	0.0203804
120.078	0.992526	0.0326991
135.094	1.00872	0.0034907
150.109	1.00412	0.0111715
165.125	0.989715	0.0156776
180.125	0.979915	0.0244704
195.125	0.999801	0.00799379
210.141	1.00115	0.012238
225.141	1.01276	0.0127873
240.156	0.975718	0.0184222
255.156	0.987046	0.00856866
270.172	1.00009	0.00831942
285.172	0.994571	0.0105521
300.203	0.987477	0.00998365
315.203	1.00054	0.0254041
330.219	0.981873	0.0189412
345.234	0.997252	0.00987346
360.219	0.991509	0.00636739
375.266	0.980349	0.0070654
390.281	0.978743	0.00821419
405.266	0.978729	0.00877014
420.281	0.995213	0.0150764
435.297	0.979158	0.00789889
450.297	0.982102	0.00860172
465.313	0.990435	0.0154695
480.313	0.983274	0.0153306
495.344	0.972492	0.00949026
510.344	0.98479	0.019239
525.375	0.997058	0.0237838
540.359	0.989801	0.038017
555.359	0.98724	0.0339083
570.375	0.996962	0.0257702
585.406	1.00017	0.0487049
600.406	1.00657	0.0521296
615.422	1.02275	0.0532487
630.438	1.0029	0.0485448
645.438	1.02975	0.0570784
660.438	1.02414	0.0718106
675.438	1.03687	0.0616747
690.453	1.04521	0.0716863
705.469	1.06273	0.0669676
720.484	1.06083	0.0702992
735.516	1.05986	0.0634729
750.516	1.07735	0.0667807
765.516	1.1075	0.089066
780.531	1.1006	0.0786557
795.531	1.11564	0.0736928
810.547	1.12093	0.086615
825.563	1.15703	0.113977
840.547	1.15938	0.0926993
855.578	1.17681	0.110045
870.594	1.19472	0.112416
885.594	1.19786	0.113736
900.609	1.19996	0.116535
915.625	1.2009	0.115542
930.609	1.20493	0.138869
945.625	1.25923	0.162518
960.641	1.24837	0.154382
975.625	1.24741	0.148627
990.656	1.24163	0.147141
1005.67	1.26556	0.158462
1020.67	1.25535	0.154433
1035.67	1.25919	0.152113
1050.7	1.28016	0.174181
1065.69	1.28656	0.167608
1080.73	1.27963	0.161604
1095.72	1.2697	0.157904
1110.75	1.29194	0.163581
1125.77	1.27605	0.161702
1140.77	1.29533	0.168532
1155.77	1.28037	0.180393
1170.78	1.28081	0.177593
1185.78	1.30735	0.179578
1200.8	1.29396	0.189655
1215.8	1.29058	0.186958
1230.83	1.27518	0.175765
1245.81	1.29791	0.179637
1260.84	1.27404	0.169726
1275.84	1.28042	0.182595
1290.84	1.27742	0.180733
1305.86	1.2637	0.177852
1320.88	1.2834	0.1798
1335.88	1.28996	0.174406
1350.89	1.28002	0.183308
1365.91	1.25445	0.174182
1380.91	1.26231	0.168866
1395.94	1.24859	0.180016
1410.94	1.26942	0.179265
1425.95	1.25338	0.162255
1440.95	1.26344	0.17116
1455.98	1.20178	0.170459
1470.97	1.21951	0.149718
1485.98	1.2106	0.155544
1501.02	1.20225	0.140312
1515.98	1.23194	0.155757
1531.03	1.2071	0.148132
1546.03	1.20677	0.145587
1561.05	1.19044	0.151213
1576.06	1.1763	0.133322
1591.08	1.18116	0.137469
1606.09	1.14269	0.137296
1621.09	1.13353	0.136932
1636.09	1.09813	0.124806
1651.11	1.09072	0.120884
1666.13	1.06776	0.109959
1681.13	1.03997	0.102682
1696.11	1.02891	0.0913727
1711.14	1.00093	0.0787751
1726.16	0.981584	0.0787183
1741.16	0.96573	0.0767452
1756.19	0.948325	0.0726609
1771.19	0.949468	0.0740999
1786.19	0.904178	0.0708225
1801.2	0.89471	0.0714781
1816.2	0.870576	0.0725098
1831.2	0.873632	0.0777612
1846.23	0.854777	0.0843476
1861.22	0.82894	0.0800634
1876.27	0.814939	0.0812439
1891.27	0.800562	0.0767755
1906.25	0.807552	0.0720099
1921.3	0.815129	0.0767416
1936.28	0.797687	0.0800982
1951.3	0.780002	0.0785157
1966.31	0.798042	0.0883087
1981.3	0.798295	0.0842261
1996.33	0.792498	0.0808118
2011.33	0.778749	0.0836519
2026.33	0.766033	0.0867671
2041.38	0.78816	0.0863495
2056.36	0.757944	0.0938401
2071.39	0.770079	0.0854666
2086.39	0.76447	0.0999184
2101.41	0.765277	0.0931521
2116.41	0.751407	0.0909943
2131.41	0.757124	0.0880615
2146.42	0.748828	0.0927967
2161.42	0.757875	0.0921894
2176.44	0.736523	0.0925141
2191.45	0.750127	0.0953038
2206.48	0.75612	0.0956703
2221.48	0.74675	0.0959255
2236.5	0.741477	0.0945004
2251.48	0.741682	0.0914669
2266.53	0.739117	0.0927176
2281.53	0.744215	0.0939391
2296.55	0.740372	0.0938508
2311.56	0.752586	0.0961055
2326.56	0.741538	0.0978925
2341.56	0.740709	0.103318
2356.55	0.728464	0.0985788
2371.59	0.744004	0.0956978
2386.58	0.752614	0.101367
2401.59	0.736078	0.104067
2416.61	0.751767	0.0981964
2431.63	0.735966	0.100316
2446.63	0.746084	0.0965602
2461.64	0.749164	0.0950151
2476.64	0.760347	0.0897476
2491.67	0.792827	0.0887586
2506.67	0.793413	0.0852837
2521.67	0.816077	0.0810348
2536.67	0.827424	0.078005
2551.69	0.839303	0.0688354
2566.69	0.860468	0.0607134
2581.72	0.876518	0.0615169
2596.72	0.911311	0.0567231
2611.73	0.945246	0.0689041
2626.77	0.99449	0.0782984
2641.75	1.02382	0.112161
2656.75	1.05406	0.12988
2671.78	1.09639	0.149021
2686.77	1.11072	0.168866
2701.81	1.13433	0.170024
2716.81	1.14674	0.191544
2731.81	1.16121	0.184655
2746.83	1.1687	0.196973
2761.84	1.18834	0.206219
2776.86	1.23192	0.243059
2791.86	1.21899	0.223946
2806.88	1.21141	0.218723
2821.86	1.23204	0.226095
2836.88	1.25271	0.236675
2851.88	1.26014	0.253677
2866.89	1.27359	0.249087
2881.92	1.28285	0.265736
2896.95	1.26897	0.244909
2911.95	1.28199	0.263943
2926.94	1.30546	0.273393
2941.95	1.31453	0.278816
2956.98	1.30597	0.279018
2971.97	1.30759	0.279454
2986.98	1.33412	0.294674
3001.98	1.34086	0.289241
3017.02	1.31562	0.271218
3032.05	1.30648	0.256218
3047.02	1.32961	0.299005
3062.03	1.31296	0.256831
3077.03	1.31103	0.265556
3092.08	1.32875	0.278601
3107.06	1.32862	0.272176
3122.06	1.31019	0.26964
3137.08	1.3313	0.284323
3152.08	1.30322	0.268125
3167.09	1.27102	0.242388
3182.13	1.30228	0.262453
3197.11	1.326	0.275521
3212.14	1.29179	0.249176
3227.16	1.28077	0.247749
3242.17	1.28858	0.251562
3257.19	1.24694	0.205305
3272.17	1.26913	0.229007
3287.19	1.28377	0.248162
3302.2	1.27884	0.239864
3317.22	1.27525	0.223183
3332.23	1.25392	0.204192
3347.22	1.29218	0.239934
3362.25	1.29031	0.239962
3377.23	1.30022	0.265377
3392.25	1.27736	0.233576
3407.28	1.28876	0.25203
3422.27	1.28368	0.241613
3437.3	1.3136	0.274919
3452.3	1.32908	0.304093
3467.3	1.29687	0.2706
3482.33	1.27954	0.254821
3497.34	1.32509	0.29183
3512.36	1.30298	0.289221
3527.33	1.27316	0.259419
3542.36	1.29032	0.26115
3557.38	1.26198	0.247453
3572.36	1.29396	0.281878
3587.38	1.23979	0.232716
3602.38	1.2347	0.22022
3617.41	1.2507	0.252641
3632.42	1.23339	0.236385
3647.41	1.27218	0.264351
3662.45	1.23483	0.246839
3677.45	1.22509	0.234236
3692.45	1.21915	0.243455
3707.45	1.20606	0.235595
3722.47	1.19646	0.21325
3737.47	1.19228	0.227584
3752.48	1.22012	0.239751
3767.52	1.20343	0.236403
3782.52	1.16744	0.207095
3797.53	1.16188	0.216354
3812.55	1.15766	0.202586
3827.55	1.1887	0.228384
3842.56	1.17194	0.232846
3857.56	1.16314	0.226372
3872.56	1.1629	0.224042
3887.59	1.12916	0.201598
3902.59	1.13224	0.198216
3917.63	1.13852	0.212789
3932.61	1.13484	0.19962
3947.61	1.15816	0.224948
3962.64	1.13718	0.201815
3977.67	1.14305	0.204733
3992.64	1.13661	0.214063
4007.69	1.14129	0.204181
4022.67	1.10826	0.18218
4037.7	1.08607	0.166014
4052.7	1.09695	0.18277
4067.7	1.11646	0.1952
4082.73	1.12111	0.186852
4097.75	1.09708	0.176004
4112.72	1.09966	0.183969
4127.73	1.09174	0.180925
4142.78	1.10512	0.179076
4157.77	1.06925	0.153387
4172.8	1.09283	0.182345
4187.8	1.07367	0.16297
4202.8	1.07536	0.16897
4217.83	1.06529	0.181689
4232.81	1.09979	0.189841
4247.84	1.05134	0.159927
4262.84	1.06838	0.160477
4277.83	1.0778	0.172356
4292.86	1.05542	0.147691
4307.84	1.07223	0.164683
4322.89	1.07626	0.180613
4337.88	1.04766	0.152685
4352.89	1.05481	0.14934
4367.92	1.04734	0.148063
4382.92	1.07851	0.160963
4397.92	1.06742	0.155541
4412.95	1.05834	0.152155
4427.94	1.06543	0.163962
4442.94	1.1017	0.199665
4457.97	1.06787	0.161347
4473	1.10045	0.194337
4488	1.05749	0.169404
4502.98	1.09162	0.18694
4518.02	1.0774	0.172741
4533.02	1.06897	0.17255
4548.02	1.06837	0.164383
4563.03	1.11126	0.197113
4578.05	1.03844	0.140712
4593.05	1.0856	0.190831
4608.06	1.08991	0.197016
4623.08	1.14343	0.234215
4638.09	1.09099	0.197022
4653.09	1.07972	0.173882
4668.11	1.10354	0.202795
4683.13	1.12299	0.217575
4698.14	1.10126	0.183053
4713.11	1.10526	0.198372
4728.16	1.07418	0.18679
4743.17	1.08248	0.19213
4758.19	1.09678	0.198994
4773.19	1.08517	0.20712
4788.2	1.09898	0.199735
4803.2	1.07908	0.189292
4818.22	1.0901	0.196164
4833.23	1.09683	0.195244
4848.23	1.07873	0.164116
4863.23	1.06582	0.171994
4878.25	1.07007	0.188613
4893.25	1.07183	0.191494
4908.25	1.05465	0.173951
4923.3	1.08533	0.182814
4938.27	1.10152	0.204144
4953.31	0.938243	0.195036
4968.31	0.942208	0.205181
4983.31	0.950971	0.198555
4998.33	0.782533	0.232711
5013.33	0.796949	0.244623
5028.36	0.785058	0.233942
5043.34	0.659593	0.272241

## Sheet: Fig 10C
Scramble
Time	AVG	SEM
0	0.998518	0.055448
15.0313	0.99709	0.0424472
30.0313	1.01047	0.0282713
45.0313	0.998906	0.0299097
60.0313	0.957115	0.0335826
75.0625	0.99519	0.0395945
90.0781	0.999746	0.0254107
105.047	0.98655	0.0188398
120.078	0.997678	0.0120536
135.094	0.991153	0.00779682
150.109	0.974038	0.00843707
165.125	0.992322	0.00890649
180.125	0.967669	0.0119209
195.125	1.00572	0.0149651
210.141	1.00669	0.0103139
225.141	1.03805	0.0294795
240.156	0.985436	0.0109959
255.156	0.998286	0.0272632
270.172	1.02732	0.0209954
285.172	1.00421	0.0246351
300.203	1.00966	0.00639277
315.203	0.995795	0.0126716
330.219	1.04563	0.0185249
345.234	1.03863	0.019876
360.219	1.06614	0.0301591
375.266	1.04369	0.0244826
390.281	1.02638	0.0131083
405.266	1.05423	0.0294056
420.281	0.998092	0.026361
435.297	1.00399	0.0342203
450.297	1.02299	0.0330737
465.313	1.02936	0.0336993
480.313	1.01036	0.0229577
495.344	1.0202	0.0471776
510.344	1.01109	0.0438193
525.375	1.02162	0.0266118
540.359	1.0281	0.0191198
555.359	1.04165	0.0340366
570.375	1.01976	0.035478
585.406	1.03639	0.0430088
600.406	1.0198	0.0351516
615.422	1.02832	0.0601934
630.438	1.06772	0.0511728
645.438	1.02688	0.0382657
660.438	1.05857	0.0598927
675.438	1.04227	0.0604649
690.453	1.02907	0.0491944
705.469	1.04079	0.040312
720.484	1.05797	0.0616555
735.516	1.04136	0.0498526
750.516	1.05193	0.0511032
765.516	1.05786	0.0548205
780.531	1.06264	0.0568106
795.531	1.07853	0.0628648
810.547	1.07998	0.050426
825.563	1.07227	0.0566624
840.547	1.10307	0.0550978
855.578	1.09852	0.0503717
870.594	1.09334	0.0509195
885.594	1.10843	0.0493229
900.609	1.12097	0.049886
915.625	1.1326	0.0481938
930.609	1.13774	0.0525963
945.625	1.13228	0.0473312
960.641	1.13733	0.0456526
975.625	1.13669	0.0410366
990.656	1.14356	0.0397703
1005.67	1.16676	0.0613257
1020.67	1.19845	0.0678208
1035.67	1.19344	0.0720393
1050.7	1.19937	0.0746951
1065.69	1.21845	0.0994916
1080.73	1.20448	0.0767396
1095.72	1.25217	0.106906
1110.75	1.23367	0.0973302
1125.77	1.24102	0.102684
1140.77	1.21888	0.0843784
1155.77	1.25633	0.100148
1170.78	1.26705	0.107331
1185.78	1.27626	0.132061
1200.8	1.26521	0.111953
1215.8	1.26147	0.0891492
1230.83	1.26678	0.122043
1245.81	1.27425	0.107954
1260.84	1.26657	0.114758
1275.84	1.26206	0.115075
1290.84	1.26501	0.119239
1305.86	1.24051	0.0860699
1320.88	1.23825	0.0937688
1335.88	1.26862	0.123468
1350.89	1.26293	0.115561
1365.91	1.29186	0.127669
1380.91	1.30145	0.141851
1395.94	1.28617	0.122885
1410.94	1.31116	0.140524
1425.95	1.30017	0.148009
1440.95	1.28403	0.118591
1455.98	1.30108	0.131393
1470.97	1.3014	0.131986
1485.98	1.27354	0.118753
1501.02	1.2902	0.124654
1515.98	1.27461	0.114124
1531.03	1.23177	0.081268
1546.03	1.2624	0.106999
1561.05	1.26711	0.112634
1576.06	1.29666	0.137665
1591.08	1.29839	0.141356
1606.09	1.29803	0.139756
1621.09	1.3051	0.150401
1636.09	1.29858	0.139888
1651.11	1.29998	0.148316
1666.13	1.2923	0.145891
1681.13	1.31611	0.158726
1696.11	1.31269	0.171574
1711.14	1.28874	0.141875
1726.16	1.31932	0.169057
1741.16	1.2917	0.138736
1756.19	1.28325	0.149477
1771.19	1.30109	0.153753
1786.19	1.30783	0.159179
1801.2	1.28465	0.13378
1816.2	1.3026	0.152181
1831.2	1.27131	0.133505
1846.23	1.28936	0.132139
1861.22	1.32755	0.170933
1876.27	1.32302	0.152663
1891.27	1.28892	0.146639
1906.25	1.28748	0.138864
1921.3	1.32774	0.174228
1936.28	1.34441	0.195709
1951.3	1.324	0.177012
1966.31	1.31242	0.166474
1981.3	1.33394	0.19116
1996.33	1.3248	0.17435
2011.33	1.314	0.172587
2026.33	1.31534	0.172425
2041.38	1.30579	0.172255
2056.36	1.29568	0.155569
2071.39	1.34435	0.203851
2086.39	1.30235	0.174375
2101.41	1.33627	0.199979
2116.41	1.31066	0.188644
2131.41	1.3273	0.189718
2146.42	1.32359	0.195165
2161.42	1.30454	0.170489
2176.44	1.31987	0.193333
2191.45	1.33127	0.209064
2206.48	1.30951	0.192671
2221.48	1.31312	0.193667
2236.5	1.32785	0.204314
2251.48	1.32041	0.193618
2266.53	1.30672	0.179172
2281.53	1.31991	0.180947
2296.55	1.29696	0.17851
2311.56	1.3283	0.192562
2326.56	1.33685	0.218549
2341.56	1.29113	0.183626
2356.55	1.30911	0.197267
2371.59	1.32845	0.207573
2386.58	1.2851	0.175001
2401.59	1.3134	0.190985
2416.61	1.32242	0.20553
2431.63	1.32811	0.203663
2446.63	1.31861	0.198595
2461.64	1.30325	0.185228
2476.64	1.30094	0.192764
2491.67	1.29717	0.181557
2506.67	1.30924	0.19976
2521.67	1.28178	0.180198
2536.67	1.29971	0.197298
2551.69	1.29284	0.179702
2566.69	1.28774	0.172842
2581.72	1.30309	0.188728
2596.72	1.26881	0.161689
2611.73	1.28382	0.175977
2626.77	1.28295	0.159757
2641.75	1.27509	0.166123
2656.75	1.28354	0.165127
2671.78	1.30974	0.173194
2686.77	1.30349	0.173271
2701.81	1.27877	0.163783
2716.81	1.31185	0.176014
2731.81	1.29427	0.166974
2746.83	1.27825	0.159202
2761.84	1.30432	0.164958
2776.86	1.29133	0.152761
2791.86	1.30815	0.172224
2806.88	1.32522	0.175983
2821.86	1.305	0.164265
2836.88	1.30115	0.164877
2851.88	1.33037	0.175887
2866.89	1.30859	0.160903
2881.92	1.32425	0.162556
2896.95	1.33477	0.173281
2911.95	1.29657	0.145255
2926.94	1.33176	0.173963
2941.95	1.31154	0.160803
2956.98	1.32435	0.161796
2971.97	1.31915	0.156821
2986.98	1.32264	0.156204
3001.98	1.33667	0.159149
3017.02	1.33376	0.160228
3032.05	1.3168	0.161147
3047.02	1.33155	0.152528
3062.03	1.33011	0.151509
3077.03	1.32713	0.163901
3092.08	1.34321	0.165434
3107.06	1.37861	0.197598
3122.06	1.36416	0.175902
3137.08	1.37173	0.186527
3152.08	1.33524	0.150702
3167.09	1.3438	0.16061
3182.13	1.34554	0.16813
3197.11	1.3761	0.19322
3212.14	1.35011	0.174605
3227.16	1.35957	0.187695
3242.17	1.35836	0.172715
3257.19	1.33661	0.15616
3272.17	1.34897	0.171629
3287.19	1.33975	0.158015
3302.2	1.33217	0.1446
3317.22	1.36292	0.194305
3332.23	1.35539	0.171611
3347.22	1.35895	0.175509
3362.25	1.4184	0.181714
3377.23	1.42273	0.181803
3392.25	1.42619	0.1705
3407.28	1.42279	0.199564
3422.27	1.43351	0.206726
3437.3	1.40997	0.187592
3452.3	1.4402	0.224322
3467.3	1.4443	0.235237
3482.33	1.4762	0.247525
3497.34	1.46031	0.259579
3512.36	1.42798	0.235755
3527.33	1.40259	0.208902
3542.36	1.4617	0.243381
3557.38	1.40544	0.212013
3572.36	1.43553	0.213422
3587.38	1.40803	0.214995
3602.38	1.42563	0.236901
3617.41	1.42016	0.221079
3632.42	1.40217	0.206176
3647.41	1.40415	0.194589
3662.45	1.40899	0.216075
3677.45	1.38559	0.190414
3692.45	1.38795	0.201878
3707.45	1.37626	0.204393
3722.47	1.38044	0.208507
3737.47	1.36873	0.17806
3752.48	1.38265	0.174306
3767.52	1.35496	0.176841
3782.52	1.3136	0.180177
3797.53	1.3465	0.170152
3812.55	1.34715	0.170565
3827.55	1.32051	0.152779
3842.56	1.30813	0.147795
3857.56	1.29009	0.149549
3872.56	1.28946	0.135697
3887.59	1.29523	0.12043
3902.59	1.27483	0.151511
3917.63	1.28115	0.13826
3932.61	1.23938	0.102198
3947.61	1.24165	0.100655
3962.64	1.22336	0.0839457
3977.67	1.2569	0.10226
3992.64	1.24326	0.0959147
4007.69	1.2212	0.0984428
4022.67	1.24918	0.0953967
4037.7	1.24834	0.0998755
4052.7	1.23372	0.114255
4067.7	1.22764	0.0889384
4082.73	1.21195	0.093977
4097.75	1.20281	0.0891884
4112.72	1.22423	0.102224
4127.73	1.19314	0.0859615
4142.78	1.20731	0.0851919
4157.77	1.18422	0.108069
4172.8	1.17363	0.0806469
4187.8	1.24537	0.108954
4202.8	1.17915	0.103423
4217.83	1.17326	0.0923381
4232.81	1.20269	0.0964625
4247.84	1.19351	0.093595
4262.84	1.16762	0.108084
4277.83	1.19743	0.0911315
4292.86	1.18601	0.0948301
4307.84	1.22323	0.110604
4322.89	1.20394	0.0885827
4337.88	1.19205	0.105847
4352.89	1.16367	0.0933102
4367.92	1.16037	0.0931546
4382.92	1.14829	0.0885071
4397.92	1.16737	0.104912
4412.95	1.14186	0.0829179
4427.94	1.16114	0.110038
4442.94	1.13841	0.0947036
4457.97	1.13626	0.100983
4473	1.13747	0.0913961
4488	1.12935	0.0826624
4502.98	1.11085	0.0947904
4518.02	1.11169	0.0630473
4533.02	1.11628	0.0881001
4548.02	1.10243	0.080549
4563.03	1.11341	0.0837957
4578.05	1.07852	0.0759553
4593.05	1.08775	0.0701142
4608.06	1.10387	0.0779793
4623.08	1.08993	0.0767978
4638.09	1.0793	0.0770084
4653.09	1.1117	0.0874746
4668.11	1.08312	0.067601
4683.13	1.07429	0.0605531
4698.14	1.05893	0.0676916
4713.11	1.07949	0.0716051
4728.16	1.07492	0.0679791
4743.17	1.06396	0.0552977
4758.19	1.06941	0.0707289
4773.19	1.06354	0.0600445
4788.2	1.08096	0.080921
4803.2	1.05503	0.0635945
4818.22	1.06251	0.0663708
4833.23	1.09301	0.0898373
4848.23	1.04413	0.0599563
4863.23	1.05555	0.0710601
4878.25	1.08546	0.0724918
4893.25	1.05765	0.0647757
4908.25	1.05662	0.0574429
4923.3	1.08935	0.0642931
4938.27	1.06225	0.0562552
4953.31	1.07705	0.0682977
4968.31	1.07584	0.0661225
4983.31	1.10131	0.0798987
4998.33	1.06295	0.0667853
5013.33	1.08813	0.065305
5028.36	1.05754	0.0612545
5043.34	1.07739	0.0757572
	1.11291	0.0545508
	1.07892	0.071953
	0.792726	0.029302
	0.757145	0.0514761
	0.770104	0.06183
	0.789284	0.0733267
	0.771864	0.0734423
	0.75097	0.0438274
	0.782729	0.0665949
	0.824529	0.0924047
	0.797155	0.0804837
	0.791513	0.0644891
	0.788817	0.0722931
	0.769463	0.062522
	0.821035	0.0988725
	0.838566	0.115784
	0.81894	0.100091
	0.790747	0.0821955
	0.821654	0.0910559
	0.805043	0.103378
	0.791857	0.0965723
	0.814988	0.113806
	0.789366	0.0984301
	0.852498	0.136737
	0.560086	0.145277
	0.566321	0.150535
	0.541244	0.112344
	0.55375	0.110003
	0.54146	0.127225
	0.549197	0.106124
	0.547648	0.0874665
	0.578637	0.139414
	0.56492	0.118123
	0.563473	0.153293
	0.572869	0.173869
	0.567866	0.179199
	0.582595	0.160643
	0.546026	0.143361
	0.546362	0.114631
	0.559864	0.11559
	0.571044	0.144808
	0.560412	0.140954
	0.577372	0.138293
	0.552764	0.12997
	0.563163	0.14045
	0.574604	0.169035
	0.2488	#DIV/0!
	0.240205	#DIV/0!
	0.221068	#DIV/0!
	0.242605	#DIV/0!
	0.243451	#DIV/0!
	0.228975	#DIV/0!
	0.231138	#DIV/0!
	0.227244	#DIV/0!
	0.22154	#DIV/0!
	0.226516	#DIV/0!
	0.227067	#DIV/0!
	0.224904	#DIV/0!
	0.231807	#DIV/0!
	0.223999	#DIV/0!
	0.221717	#DIV/0!

## Sheet: Fig 10D
35	35G	Gap26	35G Wash	35S	SCRL	35S Wash
0.323766	0.170477	-0.134206	0.0649963	0.873536	0.954129	0.950687
0.262807	0.135795	-0.0684325	0.0748851	0.254504	0.22567	0.305282
0.4055	0.154707	-0.100897	0.154707	0.340648	0.221936	0.257635
0.168102	0.0698388	-0.566714	-0.0380715	0.182912	0.00597907	0.119267
0.343688	0.228542	-0.280405	0.17174	0.0630218	-0.0150821	-0.0164288
0.206622	1.23345	-0.590347	1.81639
