# Supplementary material for: CO2-dependent opening of connexin 43 hemichannels
Source: eLife. 2026 Jun 3;14:RP105989. doi: 10.7554/eLife.105989 (PMC13233067; doi:10.7554/eLife.105989)
Supplement: Figure 11—source data 1. [file elife-105989-fig11-data1.xlsx]

## Sheet: Fig 11A
L90V
0 Ca	70	20			Cum. Prob. 20	Cum. Prob. 70	Cum. Prob. 0 Ca
857.598	536.8	535.78		1	0.00218341	0.00181488	0.00194932
873.874	552.049	597.426		2	0.00436681	0.00362976	0.00389864
941.202	557.95	603.66		3	0.00655022	0.00544465	0.00584795
984.18	573.171	604.92		4	0.00873362	0.00725953	0.00779727
1039.22	583.003	610.375		5	0.010917	0.00907441	0.00974659
1047.61	612.661	623.994		6	0.0131004	0.0108893	0.0116959
1058.17	617.502	626.671		7	0.0152838	0.0127042	0.0136452
1063.99	625.205	645.764		8	0.0174672	0.0145191	0.0155945
1070.11	629.379	669.34		9	0.0196507	0.0163339	0.0175439
1070.55	658.848	699.469		10	0.0218341	0.0181488	0.0194932
1071.33	686.636	716.908		11	0.0240175	0.0199637	0.0214425
1076.32	704.73	719.58		12	0.0262009	0.0217786	0.0233918
1096.62	719.745	725.045		13	0.0283843	0.0235935	0.0253411
1107.3	723.823	734.507		14	0.0305677	0.0254083	0.0272904
1117.27	727.813	738.076		15	0.0327511	0.0272232	0.0292398
1132.85	729.11	751.018		16	0.0349345	0.0290381	0.0311891
1143.35	730.289	751.018		17	0.0371179	0.030853	0.0331384
1155.66	732.242	761.344		18	0.0393013	0.0326679	0.0350877
1173.94	736.382	765.253		19	0.0414847	0.0344828	0.037037
1180.44	741.941	765.58		20	0.0436681	0.0362976	0.0389864
1180.54	752.813	772.922		21	0.0458515	0.0381125	0.0409357
1182.18	753.801	774.341		22	0.0480349	0.0399274	0.042885
1205.58	764.453	776.606		23	0.0502183	0.0417423	0.0448343
1207.75	765.464	780.587		24	0.0524017	0.0435572	0.0467836
1212.44	775.423	785.379		25	0.0545852	0.0453721	0.0487329
1229.31	776.858	792.834		26	0.0567686	0.0471869	0.0506823
1250.33	786.01	793.682		27	0.058952	0.0490018	0.0526316
1253.93	787.053	798.442		28	0.0611354	0.0508167	0.0545809
1256.35	788.423	801.709		29	0.0633188	0.0526316	0.0565302
1268.86	789.494	801.985		30	0.0655022	0.0544465	0.0584795
1281.56	791.46	808.287		31	0.0676856	0.0562613	0.0604288
1282.6	794.352	809.926		32	0.069869	0.0580762	0.0623782
1283.79	797.087	811.258		33	0.0720524	0.0598911	0.0643275
1285.49	800.855	813.298		34	0.0742358	0.061706	0.0662768
1285.7	802.191	817.251		35	0.0764192	0.0635209	0.0682261
1298.54	804.639	818.172		36	0.0786026	0.0653358	0.0701754
1302.45	805.031	823.72		37	0.080786	0.0671506	0.0721248
1305.25	805.157	826.976		38	0.0829694	0.0689655	0.0740741
1324.2	806.347	833.631		39	0.0851528	0.0707804	0.0760234
1326.53	809.359	839.555		40	0.0873362	0.0725953	0.0779727
1328.91	810.055	845.52		41	0.0895197	0.0744102	0.079922
1334.87	813.08	845.535		42	0.0917031	0.076225	0.0818713
1338.31	817.843	847.992		43	0.0938865	0.0780399	0.0838207
1342.73	819.933	848.894		44	0.0960699	0.0798548	0.08577
1343.65	824.053	850.211		45	0.0982533	0.0816697	0.0877193
1348.29	825.753	854.58		46	0.100437	0.0834846	0.0896686
1357.5	827.408	855.861		47	0.10262	0.0852995	0.0916179
1379.94	834.436	857.512		48	0.104803	0.0871143	0.0935673
1387.67	835.494	860.463		49	0.106987	0.0889292	0.0955166
1390.86	846.41	865.47		50	0.10917	0.0907441	0.0974659
1392.29	849.508	866.084		51	0.111354	0.092559	0.0994152
1401.08	853.606	869.196		52	0.113537	0.0943739	0.101365
1407.82	854.075	870.872		53	0.115721	0.0961887	0.103314
1414.76	854.562	874.816		54	0.117904	0.0980036	0.105263
1420.19	855.953	874.816		55	0.120087	0.0998185	0.107212
1434.35	857.036	874.876		56	0.122271	0.101633	0.109162
1434.95	861.09	878.692		57	0.124454	0.103448	0.111111
1441.08	861.868	879.927		58	0.126638	0.105263	0.11306
1441.74	863.421	883.099		59	0.128821	0.107078	0.11501
1448.71	865.176	883.423		60	0.131004	0.108893	0.116959
1448.88	870.033	887.53		61	0.133188	0.110708	0.118908
1449.9	872.048	893.161		62	0.135371	0.112523	0.120858
1450.37	878.089	901.282		63	0.137555	0.114338	0.122807
1454.05	878.929	901.899		64	0.139738	0.116152	0.124756
1455.16	881.307	912.796		65	0.141921	0.117967	0.126706
1455.53	881.326	913.937		66	0.144105	0.119782	0.128655
1460.95	883.961	914.413		67	0.146288	0.121597	0.130604
1471.74	887.694	931.083		68	0.148472	0.123412	0.132554
1478.5	889.946	931.438		69	0.150655	0.125227	0.134503
1483.15	890.94	934.898		70	0.152838	0.127042	0.136452
1483.53	897.859	943.729		71	0.155022	0.128857	0.138402
1490.27	903.768	946		72	0.157205	0.130672	0.140351
1491.64	911.532	946.4		73	0.159389	0.132486	0.1423
1491.87	913.204	946.826		74	0.161572	0.134301	0.14425
1494.62	913.421	949.445		75	0.163755	0.136116	0.146199
1498.22	918.425	952.837		76	0.165939	0.137931	0.148148
1508.65	919.602	953.01		77	0.168122	0.139746	0.150097
1516.94	926.902	953.439		78	0.170306	0.141561	0.152047
1521.42	927.387	965.316		79	0.172489	0.143376	0.153996
1522.12	932.298	965.977		80	0.174672	0.145191	0.155945
1526.74	934.468	969.788		81	0.176856	0.147005	0.157895
1532.72	935.181	972.239		82	0.179039	0.14882	0.159844
1537.52	935.628	975.888		83	0.181223	0.150635	0.161793
1541.71	936.932	977.846		84	0.183406	0.15245	0.163743
1546.44	937.077	981.935		85	0.18559	0.154265	0.165692
1548.47	939.153	988.467		86	0.187773	0.15608	0.167641
1552.96	940.003	988.467		87	0.189956	0.157895	0.169591
1554.44	940.713	990.412		88	0.19214	0.15971	0.17154
1556.09	941.643	992.441		89	0.194323	0.161525	0.173489
1556.11	942.147	994.206		90	0.196507	0.163339	0.175439
1559.85	943.188	996.657		91	0.19869	0.165154	0.177388
1566.15	943.38	1000.39		92	0.200873	0.166969	0.179337
1574.72	943.605	1001.5		93	0.203057	0.168784	0.181287
1575.14	944.481	1004.08		94	0.20524	0.170599	0.183236
1587.83	945.12	1007.32		95	0.207424	0.172414	0.185185
1590.38	947.534	1017.5		96	0.209607	0.174229	0.187135
1590.68	951.2	1019.58		97	0.21179	0.176044	0.189084
1595.11	951.211	1020.5		98	0.213974	0.177858	0.191033
1595.23	951.879	1022.56		99	0.216157	0.179673	0.192982
1599.34	953.931	1023.34		100	0.218341	0.181488	0.194932
1631.54	964.484	1023.93		101	0.220524	0.183303	0.196881
1635.98	970.173	1027.5		102	0.222707	0.185118	0.19883
1639.65	970.921	1028.96		103	0.224891	0.186933	0.20078
1640.28	971.641	1034.38		104	0.227074	0.188748	0.202729
1642.96	974.057	1035.33		105	0.229258	0.190563	0.204678
1643.47	975.246	1035.78		106	0.231441	0.192377	0.206628
1643.64	976.834	1038.48		107	0.233624	0.194192	0.208577
1646.95	977.729	1040.62		108	0.235808	0.196007	0.210526
1657.48	979.161	1048.04		109	0.237991	0.197822	0.212476
1657.64	979.438	1050.54		110	0.240175	0.199637	0.214425
1669.58	979.486	1051		111	0.242358	0.201452	0.216374
1674.07	981.476	1054.27		112	0.244541	0.203267	0.218324
1674.49	982.214	1056.98		113	0.246725	0.205082	0.220273
1686.51	982.268	1057.89		114	0.248908	0.206897	0.222222
1687.17	984.037	1058.24		115	0.251092	0.208711	0.224172
1692.53	986.113	1059.66		116	0.253275	0.210526	0.226121
1696.6	986.646	1059.78		117	0.255459	0.212341	0.22807
1705.93	988.389	1059.97		118	0.257642	0.214156	0.230019
1710.67	990.831	1060.51		119	0.259825	0.215971	0.231969
1711.27	991.988	1060.86		120	0.262009	0.217786	0.233918
1711.77	993.889	1064.56		121	0.264192	0.219601	0.235867
1721.21	994.835	1065.21		122	0.266376	0.221416	0.237817
1723.63	995.62	1065.33		123	0.268559	0.22323	0.239766
1726.8	996.107	1066.68		124	0.270742	0.225045	0.241715
1730.8	997.701	1072.53		125	0.272926	0.22686	0.243665
1735.86	997.711	1072.53		126	0.275109	0.228675	0.245614
1744.87	1001.25	1073.37		127	0.277293	0.23049	0.247563
1752.01	1005	1073.67		128	0.279476	0.232305	0.249513
1756.18	1005.71	1074.51		129	0.281659	0.23412	0.251462
1758.17	1006.34	1076.38		130	0.283843	0.235935	0.253411
1758.5	1008.97	1076.78		131	0.286026	0.23775	0.255361
1763.92	1010.44	1079.84		132	0.28821	0.239564	0.25731
1766.39	1013.63	1081.74		133	0.290393	0.241379	0.259259
1771.49	1015.84	1081.74		134	0.292576	0.243194	0.261209
1781.35	1029.4	1082.07		135	0.29476	0.245009	0.263158
1784.32	1032.32	1084.6		136	0.296943	0.246824	0.265107
1789.42	1033.67	1086.83		137	0.299127	0.248639	0.267057
1790.09	1035	1087.78		138	0.30131	0.250454	0.269006
1796.64	1035.63	1092.28		139	0.303493	0.252269	0.270955
1797.68	1038.57	1093.28		140	0.305677	0.254083	0.272904
1808.93	1039.27	1096.33		141	0.30786	0.255898	0.274854
1821.99	1043	1099.29		142	0.310044	0.257713	0.276803
1822.78	1045.46	1107		143	0.312227	0.259528	0.278752
1823.68	1047.23	1110.97		144	0.31441	0.261343	0.280702
1824.82	1050.23	1113.8		145	0.316594	0.263158	0.282651
1825.78	1050.58	1114.19		146	0.318777	0.264973	0.2846
1828.17	1050.7	1118.2		147	0.320961	0.266788	0.28655
1832.56	1051.88	1121.01		148	0.323144	0.268603	0.288499
1833.43	1051.96	1122.21		149	0.325328	0.270417	0.290448
1838.1	1054.14	1122.38		150	0.327511	0.272232	0.292398
1841.23	1055.97	1128.83		151	0.329694	0.274047	0.294347
1844.13	1056.34	1128.93		152	0.331878	0.275862	0.296296
1856.63	1056.52	1129.57		153	0.334061	0.277677	0.298246
1858.61	1058.1	1131.17		154	0.336245	0.279492	0.300195
1861.36	1059.41	1132.35		155	0.338428	0.281307	0.302144
1867.16	1065.21	1133.3		156	0.340611	0.283122	0.304094
1868.57	1065.41	1137.78		157	0.342795	0.284936	0.306043
1878.61	1066.32	1141.14		158	0.344978	0.286751	0.307992
1882.47	1067.24	1142.09		159	0.347162	0.288566	0.309942
1884.67	1068.47	1142.31		160	0.349345	0.290381	0.311891
1890.78	1070.01	1142.51		161	0.351528	0.292196	0.31384
1892.61	1071.92	1143.87		162	0.353712	0.294011	0.315789
1893.19	1072.43	1147.83		163	0.355895	0.295826	0.317739
1894.79	1073.11	1148.89		164	0.358079	0.297641	0.319688
1896.09	1075.95	1150.3		165	0.360262	0.299456	0.321637
1896.99	1080.79	1150.55		166	0.362445	0.30127	0.323587
1902.31	1081.54	1150.67		167	0.364629	0.303085	0.325536
1903.34	1083.42	1151.13		168	0.366812	0.3049	0.327485
1906.1	1087.41	1151.14		169	0.368996	0.306715	0.329435
1912.41	1089.03	1152.56		170	0.371179	0.30853	0.331384
1919.76	1089.52	1161.62		171	0.373362	0.310345	0.333333
1926.97	1090.19	1162.8		172	0.375546	0.31216	0.335283
1937.08	1090.21	1165.01		173	0.377729	0.313975	0.337232
1937.32	1093.53	1165.22		174	0.379913	0.315789	0.339181
1939.75	1097.19	1167.72		175	0.382096	0.317604	0.341131
1951.75	1098.26	1168.36		176	0.384279	0.319419	0.34308
1954.45	1099.03	1168.44		177	0.386463	0.321234	0.345029
1962.09	1102.6	1176.51		178	0.388646	0.323049	0.346979
1967.35	1102.86	1180.28		179	0.39083	0.324864	0.348928
1970.76	1105.39	1180.47		180	0.393013	0.326679	0.350877
1979.77	1105.59	1180.83		181	0.395197	0.328494	0.352827
1983.15	1105.68	1180.9		182	0.39738	0.330309	0.354776
1986.55	1107.27	1181.8		183	0.399563	0.332123	0.356725
1988.17	1108.42	1183.35		184	0.401747	0.333938	0.358674
1993.19	1110.35	1184.45		185	0.40393	0.335753	0.360624
1995.14	1115.16	1186.74		186	0.406114	0.337568	0.362573
2004.12	1116.06	1188.42		187	0.408297	0.339383	0.364522
2004.6	1116.36	1193.69		188	0.41048	0.341198	0.366472
2006.61	1116.91	1198.09		189	0.412664	0.343013	0.368421
2011.54	1124.82	1199.53		190	0.414847	0.344828	0.37037
2017.05	1125.25	1201.88		191	0.417031	0.346642	0.37232
2017.95	1127.22	1203.34		192	0.419214	0.348457	0.374269
2020.64	1128.41	1205.59		193	0.421397	0.350272	0.376218
2020.92	1128.8	1206.88		194	0.423581	0.352087	0.378168
2024.05	1129.16	1207.33		195	0.425764	0.353902	0.380117
2025.28	1130.27	1207.99		196	0.427948	0.355717	0.382066
2030.19	1130.3	1211.66		197	0.430131	0.357532	0.384016
2043.77	1131.45	1214.43		198	0.432314	0.359347	0.385965
2048.28	1132.19	1214.57		199	0.434498	0.361162	0.387914
2049.21	1133.54	1215.31		200	0.436681	0.362976	0.389864
2052.11	1133.55	1215.48		201	0.438865	0.364791	0.391813
2052.94	1134.08	1216.25		202	0.441048	0.366606	0.393762
2053.13	1140.62	1217.95		203	0.443231	0.368421	0.395712
2055.3	1146.16	1218.73		204	0.445415	0.370236	0.397661
2056.49	1146.22	1219.08		205	0.447598	0.372051	0.39961
2058.75	1147.48	1222.9		206	0.449782	0.373866	0.401559
2062.49	1150.57	1224.19		207	0.451965	0.375681	0.403509
2065.59	1152	1225.42		208	0.454148	0.377495	0.405458
2067.07	1152.86	1225.42		209	0.456332	0.37931	0.407407
2068.14	1153.94	1227.04		210	0.458515	0.381125	0.409357
2079.53	1153.99	1229.14		211	0.460699	0.38294	0.411306
2079.91	1154.54	1230.08		212	0.462882	0.384755	0.413255
2082.01	1155.66	1232.02		213	0.465066	0.38657	0.415205
2086.01	1156.54	1232.67		214	0.467249	0.388385	0.417154
2087.82	1157.65	1233.25		215	0.469432	0.3902	0.419103
2095.15	1158.41	1234.96		216	0.471616	0.392015	0.421053
2103.58	1158.73	1241.53		217	0.473799	0.393829	0.423002
2104.16	1159.9	1242.83		218	0.475983	0.395644	0.424951
2107.12	1160.77	1244.77		219	0.478166	0.397459	0.426901
2111.67	1162.34	1245.53		220	0.480349	0.399274	0.42885
2114.13	1163.79	1245.8		221	0.482533	0.401089	0.430799
2115.02	1165.42	1248.3		222	0.484716	0.402904	0.432749
2116.44	1166.08	1248.86		223	0.4869	0.404719	0.434698
2124.33	1168.39	1251.51		224	0.489083	0.406534	0.436647
2139.58	1169.89	1251.96		225	0.491266	0.408348	0.438596
2142.82	1171.44	1253.41		226	0.49345	0.410163	0.440546
2145.11	1171.69	1255.43		227	0.495633	0.411978	0.442495
2145.22	1173.92	1257.54		228	0.497817	0.413793	0.444444
2148.43	1175.52	1258.98		229	0.5	0.415608	0.446394
2150.51	1176.41	1261.42		230	0.502183	0.417423	0.448343
2152.48	1184.51	1262.7		231	0.504367	0.419238	0.450292
2162.05	1185.41	1263.42		232	0.50655	0.421053	0.452242
2167.06	1187.88	1267.86		233	0.508734	0.422868	0.454191
2169.26	1189.18	1271.01		234	0.510917	0.424682	0.45614
2172.9	1192.49	1276.27		235	0.5131	0.426497	0.45809
2176.27	1192.75	1278.53		236	0.515284	0.428312	0.460039
2199.74	1193.4	1278.66		237	0.517467	0.430127	0.461988
2200.24	1196.59	1281.32		238	0.519651	0.431942	0.463938
2208.91	1198.52	1284.27		239	0.521834	0.433757	0.465887
2211.62	1198.9	1285.34		240	0.524017	0.435572	0.467836
2215.58	1201.31	1287.15		241	0.526201	0.437387	0.469786
2224.36	1201.47	1289.97		242	0.528384	0.439201	0.471735
2226.05	1202.09	1291.28		243	0.530568	0.441016	0.473684
2231.09	1202.14	1291.32		244	0.532751	0.442831	0.475634
2232.08	1203.29	1293.15		245	0.534934	0.444646	0.477583
2235.07	1203.64	1295.29		246	0.537118	0.446461	0.479532
2237.99	1207.91	1296.33		247	0.539301	0.448276	0.481481
2247.37	1209.06	1296.93		248	0.541485	0.450091	0.483431
2250.03	1210.6	1297.19		249	0.543668	0.451906	0.48538
2258.35	1212.36	1299.92		250	0.545852	0.453721	0.487329
2259.63	1213.37	1302		251	0.548035	0.455535	0.489279
2260.22	1213.91	1302.25		252	0.550218	0.45735	0.491228
2268.95	1214.87	1302.65		253	0.552402	0.459165	0.493177
2272.2	1215.64	1308.37		254	0.554585	0.46098	0.495127
2272.58	1220.53	1309.21		255	0.556769	0.462795	0.497076
2284.96	1221.21	1309.95		256	0.558952	0.46461	0.499025
2286.85	1222.06	1310.49		257	0.561135	0.466425	0.500975
2288.87	1222.99	1312.05		258	0.563319	0.46824	0.502924
2294.67	1223.31	1313.51		259	0.565502	0.470054	0.504873
2301.43	1225.08	1313.85		260	0.567686	0.471869	0.506823
2304.95	1227.07	1318.22		261	0.569869	0.473684	0.508772
2307.84	1227.68	1321.01		262	0.572052	0.475499	0.510721
2311.49	1228.59	1323.61		263	0.574236	0.477314	0.512671
2317.8	1229.74	1326.01		264	0.576419	0.479129	0.51462
2318.87	1232.13	1327.19		265	0.578603	0.480944	0.516569
2329.05	1235.16	1333.2		266	0.580786	0.482759	0.518519
2337.19	1236.49	1334.42		267	0.582969	0.484574	0.520468
2342.22	1236.57	1337.53		268	0.585153	0.486388	0.522417
2352.15	1243.27	1338.75		269	0.587336	0.488203	0.524366
2356.11	1243.41	1339.02		270	0.58952	0.490018	0.526316
2359.17	1243.97	1345.33		271	0.591703	0.491833	0.528265
2360.34	1244.44	1347.81		272	0.593886	0.493648	0.530214
2362.15	1244.94	1348.86		273	0.59607	0.495463	0.532164
2373.66	1246.55	1350.06		274	0.598253	0.497278	0.534113
2377.35	1247.17	1350.9		275	0.600437	0.499093	0.536062
2379.81	1247.62	1356.28		276	0.60262	0.500907	0.538012
2381.59	1249.39	1358.66		277	0.604803	0.502722	0.539961
2385.62	1249.57	1359.58		278	0.606987	0.504537	0.54191
2387.11	1250.58	1361.95		279	0.60917	0.506352	0.54386
2390.83	1251.53	1362.38		280	0.611354	0.508167	0.545809
2397.47	1256.16	1366.24		281	0.613537	0.509982	0.547758
2400.18	1256.56	1373.17		282	0.615721	0.511797	0.549708
2408.5	1257.26	1375.76		283	0.617904	0.513612	0.551657
2409.65	1259.51	1375.84		284	0.620087	0.515426	0.553606
2415.56	1265.04	1381.8		285	0.622271	0.517241	0.555556
2421.64	1265.24	1381.93		286	0.624454	0.519056	0.557505
2423.39	1266.89	1386.14		287	0.626638	0.520871	0.559454
2434.11	1270.08	1386.4		288	0.628821	0.522686	0.561404
2437.69	1270.25	1388.72		289	0.631004	0.524501	0.563353
2439.31	1270.6	1393.86		290	0.633188	0.526316	0.565302
2460.45	1271.34	1395.39		291	0.635371	0.528131	0.567251
2461.46	1273	1395.47		292	0.637555	0.529946	0.569201
2468.15	1273.05	1396.01		293	0.639738	0.53176	0.57115
2469.44	1274.03	1400.92		294	0.641921	0.533575	0.573099
2473.58	1275.91	1401.34		295	0.644105	0.53539	0.575049
2477.06	1278.03	1403.17		296	0.646288	0.537205	0.576998
2482.36	1279.53	1403.39		297	0.648472	0.53902	0.578947
2503.57	1280.93	1406.24		298	0.650655	0.540835	0.580897
2505.31	1282.46	1414.1		299	0.652838	0.54265	0.582846
2506.97	1282.69	1416.73		300	0.655022	0.544465	0.584795
2511.47	1285.91	1421.58		301	0.657205	0.546279	0.586745
2514.32	1287.95	1424.39		302	0.659389	0.548094	0.588694
2517.26	1288.74	1424.48		303	0.661572	0.549909	0.590643
2523.14	1289.13	1425.99		304	0.663755	0.551724	0.592593
2529.3	1290.35	1426.12		305	0.665939	0.553539	0.594542
2530.16	1291.48	1429.61		306	0.668122	0.555354	0.596491
2535.47	1291.92	1429.61		307	0.670306	0.557169	0.598441
2536.11	1294.3	1432.54		308	0.672489	0.558984	0.60039
2541.17	1294.76	1433.3		309	0.674672	0.560799	0.602339
2543.61	1297.31	1434.76		310	0.676856	0.562613	0.604288
2545.04	1297.88	1439.16		311	0.679039	0.564428	0.606238
2545.85	1300.76	1439.97		312	0.681223	0.566243	0.608187
2548.18	1301.35	1441.96		313	0.683406	0.568058	0.610136
2554.15	1303.9	1441.97		314	0.68559	0.569873	0.612086
2554.34	1306.14	1448.79		315	0.687773	0.571688	0.614035
2559.07	1308.53	1449.41		316	0.689956	0.573503	0.615984
2576.57	1314.38	1450.82		317	0.69214	0.575318	0.617934
2582.97	1314.92	1451.22		318	0.694323	0.577132	0.619883
2586.16	1315.19	1452.81		319	0.696507	0.578947	0.621832
2594.95	1315.7	1453.64		320	0.69869	0.580762	0.623782
2604.86	1316.02	1454.65		321	0.700873	0.582577	0.625731
2607.58	1316.5	1456.19		322	0.703057	0.584392	0.62768
2611.25	1320.49	1460.46		323	0.70524	0.586207	0.62963
2612.49	1321.1	1460.51		324	0.707424	0.588022	0.631579
2618.65	1321.97	1462.13		325	0.709607	0.589837	0.633528
2620.83	1322.48	1463.52		326	0.71179	0.591652	0.635478
2627.83	1322.8	1466.12		327	0.713974	0.593466	0.637427
2630.85	1323.05	1467.45		328	0.716157	0.595281	0.639376
2631.77	1326.31	1472.51		329	0.718341	0.597096	0.641326
2631.89	1327.75	1474.19		330	0.720524	0.598911	0.643275
2633.08	1329.69	1475.49		331	0.722707	0.600726	0.645224
2637.51	1331.28	1476.88		332	0.724891	0.602541	0.647173
2638.72	1332.08	1480.13		333	0.727074	0.604356	0.649123
2641.99	1333.2	1482.44		334	0.729258	0.606171	0.651072
2642.76	1333.93	1482.44		335	0.731441	0.607985	0.653021
2653.98	1335.95	1482.75		336	0.733624	0.6098	0.654971
2654.07	1344.39	1483.3		337	0.735808	0.611615	0.65692
2660.39	1346.01	1484.16		338	0.737991	0.61343	0.658869
2668.13	1347.91	1484.55		339	0.740175	0.615245	0.660819
2672.18	1356.89	1485.69		340	0.742358	0.61706	0.662768
2681.49	1358.97	1486.7		341	0.744541	0.618875	0.664717
2682.59	1360.75	1488.74		342	0.746725	0.62069	0.666667
2686.3	1361.86	1489.49		343	0.748908	0.622505	0.668616
2688.67	1363.53	1490.81		344	0.751092	0.624319	0.670565
2693.14	1375.65	1491.16		345	0.753275	0.626134	0.672515
2695.67	1378.59	1493.1		346	0.755459	0.627949	0.674464
2699.33	1381.35	1494.63		347	0.757642	0.629764	0.676413
2700.73	1381.37	1495.85		348	0.759825	0.631579	0.678363
2703.55	1382.73	1497.8		349	0.762009	0.633394	0.680312
2717.22	1390.37	1498.52		350	0.764192	0.635209	0.682261
2718.73	1393.26	1506.02		351	0.766376	0.637024	0.684211
2730.28	1400.06	1510.64		352	0.768559	0.638838	0.68616
2751.93	1401.14	1512.42		353	0.770742	0.640653	0.688109
2759.97	1403.08	1513.13		354	0.772926	0.642468	0.690058
2764.25	1403.51	1514.51		355	0.775109	0.644283	0.692008
2778.21	1404.54	1518.06		356	0.777293	0.646098	0.693957
2781.65	1404.83	1519.1		357	0.779476	0.647913	0.695906
2782.81	1407.28	1519.79		358	0.781659	0.649728	0.697856
2785.08	1408.86	1522.32		359	0.783843	0.651543	0.699805
2790.5	1410.97	1522.83		360	0.786026	0.653358	0.701754
2794.36	1411.84	1525.19		361	0.78821	0.655172	0.703704
2799.36	1412.48	1529.89		362	0.790393	0.656987	0.705653
2799.55	1413.75	1536.27		363	0.792576	0.658802	0.707602
2801.68	1415.11	1536.65		364	0.79476	0.660617	0.709552
2812.33	1415.64	1538.43		365	0.796943	0.662432	0.711501
2822.62	1417.17	1543.32		366	0.799127	0.664247	0.71345
2823.53	1417.99	1544.99		367	0.80131	0.666062	0.7154
2824.49	1418.07	1548.44		368	0.803493	0.667877	0.717349
2829.91	1421.83	1548.53		369	0.805677	0.669691	0.719298
2839.6	1422.16	1550.83		370	0.80786	0.671506	0.721248
2840.16	1425.22	1552.51		371	0.810044	0.673321	0.723197
2849.92	1425.73	1553.6		372	0.812227	0.675136	0.725146
2852.19	1428.33	1553.94		373	0.81441	0.676951	0.727096
2854.75	1430	1555.2		374	0.816594	0.678766	0.729045
2874.78	1431.7	1557.01		375	0.818777	0.680581	0.730994
2876.95	1433.73	1557.47		376	0.820961	0.682396	0.732943
2887.11	1435.37	1559.92		377	0.823144	0.684211	0.734893
2892.23	1436.23	1562.13		378	0.825328	0.686025	0.736842
2903.09	1436.73	1562.42		379	0.827511	0.68784	0.738791
2903.68	1438.02	1564.71		380	0.829694	0.689655	0.740741
2907.8	1440.93	1567.28		381	0.831878	0.69147	0.74269
2912.41	1443.18	1568.15		382	0.834061	0.693285	0.744639
2918.42	1443.74	1569.1		383	0.836245	0.6951	0.746589
2924.14	1444.56	1574.19		384	0.838428	0.696915	0.748538
2929.57	1445.21	1575.8		385	0.840611	0.69873	0.750487
2943.69	1445.36	1576.2		386	0.842795	0.700544	0.752437
2947.27	1446.72	1576.39		387	0.844978	0.702359	0.754386
2951.12	1447.91	1580.9		388	0.847162	0.704174	0.756335
2959.67	1447.94	1581.6		389	0.849345	0.705989	0.758285
2977.79	1449.52	1581.73		390	0.851528	0.707804	0.760234
2982.39	1451.13	1582.41		391	0.853712	0.709619	0.762183
2983.22	1451.29	1582.56		392	0.855895	0.711434	0.764133
2990.26	1452.04	1582.73		393	0.858079	0.713249	0.766082
2995.43	1452.4	1584.74		394	0.860262	0.715064	0.768031
3006.2	1453.56	1593.06		395	0.862445	0.716878	0.769981
3020.24	1468.74	1601.31		396	0.864629	0.718693	0.77193
3050.45	1473.86	1608.62		397	0.866812	0.720508	0.773879
3051.18	1474.65	1614.9		398	0.868996	0.722323	0.775828
3070.65	1477.24	1617.65		399	0.871179	0.724138	0.777778
3078.44	1479.15	1622.32		400	0.873362	0.725953	0.779727
3084.69	1486.07	1625.34		401	0.875546	0.727768	0.781676
3086.38	1489.87	1625.97		402	0.877729	0.729583	0.783626
3103.27	1493.38	1627.96		403	0.879913	0.731397	0.785575
3113.32	1496.43	1631.04		404	0.882096	0.733212	0.787524
3123.14	1497.81	1634.2		405	0.884279	0.735027	0.789474
3127.63	1499.51	1636.75		406	0.886463	0.736842	0.791423
3132.03	1500.13	1639.12		407	0.888646	0.738657	0.793372
3133.48	1504.1	1640.82		408	0.89083	0.740472	0.795322
3144.64	1506.07	1641.32		409	0.893013	0.742287	0.797271
3160.03	1506.12	1641.83		410	0.895197	0.744102	0.79922
3160.63	1507.72	1645.84		411	0.89738	0.745917	0.80117
3164.86	1509.12	1650.62		412	0.899563	0.747731	0.803119
3181.86	1526.54	1653.7		413	0.901747	0.749546	0.805068
3203.86	1527.74	1659.84		414	0.90393	0.751361	0.807018
3218.66	1527.88	1660.12		415	0.906114	0.753176	0.808967
3223.28	1533.17	1663.11		416	0.908297	0.754991	0.810916
3239.55	1536.57	1663.37		417	0.91048	0.756806	0.812865
3267.54	1541.02	1668.43		418	0.912664	0.758621	0.814815
3276.15	1550.65	1668.85		419	0.914847	0.760436	0.816764
3276.37	1555.64	1670.89		420	0.917031	0.76225	0.818713
3281.87	1559.73	1671.95		421	0.919214	0.764065	0.820663
3284.93	1565.22	1673.57		422	0.921397	0.76588	0.822612
3301.66	1565.49	1675.13		423	0.923581	0.767695	0.824561
3304.16	1571.02	1678.37		424	0.925764	0.76951	0.826511
3331.71	1571.25	1678.66		425	0.927948	0.771325	0.82846
3337.21	1573.93	1679.11		426	0.930131	0.77314	0.830409
3342.68	1575.8	1679.17		427	0.932314	0.774955	0.832359
3345	1575.82	1679.93		428	0.934498	0.77677	0.834308
3359.02	1577.56	1684.82		429	0.936681	0.778584	0.836257
3361.01	1578.33	1686.27		430	0.938865	0.780399	0.838207
3388.65	1583.35	1686.43		431	0.941048	0.782214	0.840156
3445.52	1585.3	1688.5		432	0.943231	0.784029	0.842105
3449.73	1586.95	1692.11		433	0.945415	0.785844	0.844055
3471.54	1588.61	1695.22		434	0.947598	0.787659	0.846004
3501.02	1590.07	1695.6		435	0.949782	0.789474	0.847953
3509.97	1592.02	1697.55		436	0.951965	0.791289	0.849903
3512.36	1592.95	1701.38		437	0.954148	0.793103	0.851852
3522.56	1598.46	1710.76		438	0.956332	0.794918	0.853801
3540.34	1600.19	1717.68		439	0.958515	0.796733	0.85575
3612.31	1601.94	1718.04		440	0.960699	0.798548	0.8577
3613.88	1602.7	1720.74		441	0.962882	0.800363	0.859649
3627.61	1604.3	1723.68		442	0.965066	0.802178	0.861598
3646.07	1608.95	1725.83		443	0.967249	0.803993	0.863548
3672.43	1610.63	1734.77		444	0.969432	0.805808	0.865497
3697.8	1617.92	1737.36		445	0.971616	0.807623	0.867446
3717.63	1618.13	1742.21		446	0.973799	0.809437	0.869396
3784.09	1618.99	1753.44		447	0.975983	0.811252	0.871345
3788.43	1621.72	1761.31		448	0.978166	0.813067	0.873294
3826.72	1625.21	1764.83		449	0.980349	0.814882	0.875244
3891.27	1628.13	1765.29		450	0.982533	0.816697	0.877193
3898.9	1633.85	1769.65		451	0.984716	0.818512	0.879142
3952.29	1634.54	1771.78		452	0.9869	0.820327	0.881092
3953.24	1637.86	1774.4		453	0.989083	0.822142	0.883041
4027.43	1640.37	1776.16		454	0.991266	0.823956	0.88499
4147.18	1644.05	1782.17		455	0.99345	0.825771	0.88694
4235.1	1644.65	1784.65		456	0.995633	0.827586	0.888889
4460.05	1645.62	1785.69		457	0.997817	0.829401	0.890838
4466.01	1649.94	1796.33		458	1	0.831216	0.892788
	1651.02	1809.76		459		0.833031	0.894737
	1653.48	1814.96		460		0.834846	0.896686
	1661.24	1820.85		461		0.836661	0.898635
	1662.04	1822.56		462		0.838475	0.900585
	1664.7	1828.08		463		0.84029	0.902534
	1670.15	1828.87		464		0.842105	0.904483
	1673.09	1829.3		465		0.84392	0.906433
	1684.17	1829.99		466		0.845735	0.908382
	1687.52	1836.9		467		0.84755	0.910331
	1688.12	1839.53		468		0.849365	0.912281
	1689.1	1840.83		469		0.85118	0.91423
	1692.94	1841.99		470		0.852995	0.916179
	1696.34	1843.43		471		0.854809	0.918129
	1707.64	1845.33		472		0.856624	0.920078
	1707.99	1853.27		473		0.858439	0.922027
	1713.32	1857.49		474		0.860254	0.923977
	1713.6	1864.67		475		0.862069	0.925926
	1714.76	1865.62		476		0.863884	0.927875
	1728.61	1872.98		477		0.865699	0.929825
	1741.57	1874		478		0.867514	0.931774
	1743.64	1884.23		479		0.869328	0.933723
	1743.77	1886.57		480		0.871143	0.935673
	1747.68	1909.37		481		0.872958	0.937622
	1759.07	1909.62		482		0.874773	0.939571
	1762.66	1911.94		483		0.876588	0.94152
	1765.95	1913.47		484		0.878403	0.94347
	1769.96	1923.96		485		0.880218	0.945419
	1770.7	1943.46		486		0.882033	0.947368
	1772.39	1944.43		487		0.883848	0.949318
	1774.43	1959.4		488		0.885662	0.951267
	1778.33	1962.35		489		0.887477	0.953216
	1782.89	1967.26		490		0.889292	0.955166
	1786.36	1982.15		491		0.891107	0.957115
	1787.84	1992.4		492		0.892922	0.959064
	1788.79	1992.77		493		0.894737	0.961014
	1789.45	2010.02		494		0.896552	0.962963
	1793.09	2070.04		495		0.898367	0.964912
	1794.48	2074.5		496		0.900181	0.966862
	1794.66	2103.88		497		0.901996	0.968811
	1805.23	2138.98		498		0.903811	0.97076
	1823.06	2195.27		499		0.905626	0.97271
	1825.14	2199.26		500		0.907441	0.974659
	1828.57	2212.34		501		0.909256	0.976608
	1832.39	2245.67		502		0.911071	0.978558
	1842.75	2283.75		503		0.912886	0.980507
	1858.07	2288.14		504		0.914701	0.982456
	1861.34	2291.31		505		0.916515	0.984405
	1863.68	2307.95		506		0.91833	0.986355
	1864.85	2312.19		507		0.920145	0.988304
	1866.63	2321.94		508		0.92196	0.990253
	1870.96	2388.5		509		0.923775	0.992203
	1875.48	2400.7		510		0.92559	0.994152
	1885.77	2455.39		511		0.927405	0.996101
	1891.44	2595.72		512		0.92922	0.998051
	1898.23	2834.39		513		0.931034	1
	1899.1			514		0.932849
	1922.08			515		0.934664
	1939.01			516		0.936479
	1946.33			517		0.938294
	1960.87			518		0.940109
	1963.29			519		0.941924
	1975.24			520		0.943739
	1975.9			521		0.945554
	1980.41			522		0.947368
	1998.1			523		0.949183
	2018.8			524		0.950998
	2022.99			525		0.952813
	2023.7			526		0.954628
	2028.78			527		0.956443
	2034.87			528		0.958258
	2039.81			529		0.960073
	2048.08			530		0.961887
	2048.14			531		0.963702
	2050.34			532		0.965517
	2062.64			533		0.967332
	2069.23			534		0.969147
	2083.73			535		0.970962
	2093.59			536		0.972777
	2115.11			537		0.974592
	2117.38			538		0.976407
	2133.56			539		0.978221
	2142.15			540		0.980036
	2180.62			541		0.981851
	2204.24			542		0.983666
	2215.28			543		0.985481
	2229.03			544		0.987296
	2248.28			545		0.989111
	2250.12			546		0.990926
	2276.46			547		0.99274
	2289.98			548		0.994555
	2406.13			549		0.99637
	2450.73			550		0.998185
	2607.02			551		1
				552
				553

## Sheet: Fig 11B
L90V 70	L90V 0 Ca
0.40406	3.83551
0.00152	7.45148
-0.00989	9.63065
-1.14839	12.6376
-0.305135	11.2022

## Sheet: Fig 11E
A44V	L90V
-0.121526	-0.144272
-0.211898	-0.167509
0.0212287	-0.136838
0.00830317	-0.223177
0.161654	-1.26448
0.0800918	-0.997954
0.0857769	-0.600791
0.0409885	-0.731527
0.18677	-0.560588
0.143973	-0.49835
-0.365255	-0.59965
-0.104016	0.0290313
-0.0766121	0.0198411
-0.0899399	0.01182
	0.01887
