# Supplementary material for: CO2-dependent opening of connexin 43 hemichannels
Source: eLife. 2026 Jun 3;14:RP105989. doi: 10.7554/eLife.105989 (PMC13233067; doi:10.7554/eLife.105989)
Supplement: Figure 12—source data 1. [file elife-105989-fig12-data1.xlsx]

## Sheet: Sheet3
Name on tree	Annotated gene name	Accession number	URL
Cx37 Anole	GJA4	XP_060640571.1	https://www.ncbi.nlm.nih.gov/protein/XP_060640571.1
Cx37 Chicken	GJA4	XP_046787873.1	https://www.ncbi.nlm.nih.gov/protein/XP_046787873.1
Cx37 Human	GJA4	P35212.3	https://www.ncbi.nlm.nih.gov/protein/P35212.3
Cx37 Rat	GJA4	NP_067686.1	https://www.ncbi.nlm.nih.gov/protein/NP_067686.1
Cx37 X. laevis	GJA4	NP_001165443.1	https://www.ncbi.nlm.nih.gov/protein/NP_001165443.1
Cx40 Chicken	GJA5	NP_990835.2	https://www.ncbi.nlm.nih.gov/protein/NP_990835.2
Cx40 Human	GJA5	P36382.3	https://www.ncbi.nlm.nih.gov/protein/ P36382.3
Cx40 Platypus	GJA5	XP_028936770	https://www.ncbi.nlm.nih.gov/protein/XP_028936770
Cx40 Rat	GJA5	NP_062153.1	https://www.ncbi.nlm.nih.gov/protein/NP_062153.1
Cx40 Turkey	GJA5	XP_010719811.1	https://www.ncbi.nlm.nih.gov/protein/XP_010719811.1
Cx40 Turtle	GJA5	XP_007060883.1	https://www.ncbi.nlm.nih.gov/protein/XP_007060883.1
Cx43 Chicken	GJA1	XP_046768893.1	https://www.ncbi.nlm.nih.gov/protein/XP_046768893.1
Cx43 Human	GJA1	NP_000156.1	https://www.ncbi.nlm.nih.gov/protein/NP_000156.1
Cx43 Rat	GJA1	XP_032744648.1	https://www.ncbi.nlm.nih.gov/protein/XP_032744648.1
Cx43 Trout	GJA1	ABA54997.1	https://www.ncbi.nlm.nih.gov/protein/ABA54997.1
Cx46 Chicken	GJA3	NP_001035734.1	https://www.ncbi.nlm.nih.gov/protein/NP_001035734.1
Cx46 Human	GJA3	Q9Y6H8.4	https://www.ncbi.nlm.nih.gov/protein/Q9Y6H8.4
Cx46 Lamprey	GJA3	S4RXA6_PETMA	https://www.uniprot.org/uniprotkb/S4RXA6/entry
Cx46 Milkfish	GJA3	XP_030641638.1	https://www.ncbi.nlm.nih.gov/protein/XP_030641638.1
Cx46 Rat	GJA3	NP_077352.2	https://www.ncbi.nlm.nih.gov/protein/NP_077352.2
Cx46 Seahorse	GJA3	XP_019735795.1	https://www.ncbi.nlm.nih.gov/protein/XP_019735795.1
Cx50 Human	GJA8	NP_005258.2	https://www.ncbi.nlm.nih.gov/protein/NP_005258.2
Cx50 Rat	GJA8	NP_703195.2	https://www.ncbi.nlm.nih.gov/protein/NP_703195.2
Cx59 Chicken	GJA9	XP_040545632.1	https://www.ncbi.nlm.nih.gov/protein/XP_040545632.1
Cx59 Dove	GJA9	XP_005509714.2	https://www.ncbi.nlm.nih.gov/protein/XP_005509714.2
Cx59 Human	GJA9	AAG09406.1	https://www.ncbi.nlm.nih.gov/protein/AAG09406.1
Cx59 Anole	GJA10	XP_060611036.1	https://www.ncbi.nlm.nih.gov/protein/XP_060611036.1
Cx57 Mouse	GJA10	Q9WUS4.2	https://www.ncbi.nlm.nih.gov/protein/Q9WUS4.2
Cx62 Bat	GJA10	KC211205.1	https://www.ncbi.nlm.nih.gov/protein/KC211205.1
Cx62 Chicken	GJA10	XP_040524106.1	https://www.ncbi.nlm.nih.gov/protein/XP_040524106.1
Cx62 Human	GJA10	NP_115991.1	https://www.ncbi.nlm.nih.gov/protein/NP_115991.1
Cx62 Rat	GJA10	NP_001398784.1	https://www.ncbi.nlm.nih.gov/protein/NP_001398784.1
